# Supplementary material for: Genetic markers associated with divergent selection against the parasite Marteilia cochillia in common cockle (Cerastoderma edule) using transcriptomics and population genomics data
Source: Frontiers journal article supplement (doi:10.3389/fmars.2023.1057206), 2023-04-04
Supplement: Data_Sheet_1.xlsx [file Data_Sheet_1.xlsx]

## Sheet: Supplementary table 1
Table S1: Genotype matrix of 77 individuals from Ría de Arousa of Cerastoderma edule with 9.154 SNPs. Samples are divided in four sampling sites: SLO19 collected in Lombos de Ulla in 2019 during Martelia cochillia outbreak; SLO18 samples collected in Lombos Ulla in 2018; SLO12 and SSA12 samples collected in 2012 in Lombos de Ulla and Sarrido before the first detection of the parasite
	33_7	141_29	153_11	167_7	248_0	297_11	551_30	581_18	617_9	732_5	782_18	815_35	1044_31	1201_0	1531_16	1682_27	1801_9	1890_20	1891_30	1892_26	1906_29	1911_26	2026_6	2047_25	2408_28	2424_18	2444_1	2445_31	2506_2	2647_2	2651_33	2667_19	2721_27	2790_0	2810_30	2933_1	3063_33	3076_17	3143_18	3148_24	3222_27	3227_28	3255_3	3256_31	3335_31	3457_27	3476_9	3528_20	3534_34
SLO19_S48	100100	MD	120120	110110	100100	110110	120120	110110	120120	100100	130130	120120	120120	110100	120120	100100	110110	100100	100100	130130	120120	120120	130110	110110	130130	110110	120120	100120	100100	100100	130130	120120	130130	100100	MD	110110	130130	120120	MD	130130	120120	120120	130130	110110	MD	120100	120120	MD	100100
SLO19_S41	100100	130130	120120	110110	MD	110110	120120	110110	120120	100100	130130	120120	100120	110100	120120	100100	110110	100120	100100	130130	120120	120120	110110	MD	130130	110110	110120	100120	100100	100100	130130	120120	130130	100100	130130	110110	130130	MD	100100	130130	120120	120120	130130	110110	MD	100100	120100	120120	100100
SLO19_S40	100100	130130	120120	110110	MD	MD	120120	110110	120120	100100	MD	120120	120120	110100	120120	100100	110110	100120	100100	130130	120120	120120	110110	110110	130130	130110	120120	120120	100100	100100	130130	120120	130130	100100	130130	110110	130130	120120	MD	130130	MD	120120	130130	110110	110110	100100	100100	MD	100100
SLO19_S34	100100	130130	120120	MD	MD	MD	120120	110110	120120	100100	MD	120120	MD	110100	120120	MD	110110	100120	100100	130130	120120	MD	110110	110110	130130	130110	120120	120120	100100	120120	MD	120120	130130	MD	MD	110110	130130	MD	MD	130130	120120	120120	130130	110110	MD	100100	100100	MD	100100
SLO19_S68	100100	130130	120120	110110	MD	110110	120120	110110	120120	100100	130130	120120	120120	110100	120120	100100	MD	100100	100100	130130	120120	120120	130110	110110	MD	110110	120120	100100	100100	120100	MD	120120	130130	MD	130130	110110	110130	120120	100100	130130	120120	MD	130130	110110	110110	100100	100100	120120	100100
SLO19_S67	100100	130130	120120	110110	100100	110110	100120	110110	120120	100100	130130	120120	100120	100100	120120	100100	MD	120120	100100	130130	120120	MD	130110	110110	130130	130110	120120	100120	100100	100100	MD	120120	130130	100100	MD	110110	130130	120120	100100	130130	120120	MD	130130	110110	110110	100100	120100	120120	100100
SLO19_S66	100100	130130	120120	110110	100100	110110	120120	110110	120120	100100	130130	120120	120120	110110	120120	100100	110110	100120	100100	130130	120120	120120	110110	MD	130130	110110	120120	100120	100100	100100	130130	120120	130130	MD	130130	110110	130130	MD	MD	130130	120120	MD	130130	110110	110110	100100	120100	120120	100100
SLO19_S65	100100	130130	120120	110110	100100	110110	120120	110110	120120	100100	130130	120120	120120	100100	MD	100100	110110	100100	100100	130130	120120	MD	110110	110110	130130	110110	120120	MD	100100	120100	130130	120120	130130	100100	130130	110110	130130	120120	MD	130130	MD	120120	130130	110110	MD	100100	120100	120120	100100
SLO19_S64	100100	130130	120120	110110	100100	110110	120120	110110	120120	100100	MD	120120	120120	110100	120120	100100	110110	120120	100100	130130	120120	120120	110110	MD	130130	110110	120120	100120	100100	MD	130130	120120	130130	100100	MD	110110	130130	120120	MD	130130	MD	120120	130130	110110	110110	100100	120100	120120	100100
SLO19_S63	100100	130130	120120	110110	100100	MD	120120	110110	120120	100100	130130	120120	120120	100100	120120	100100	MD	100100	100100	130130	120120	120120	110110	MD	130130	130110	MD	100120	100100	100100	MD	120120	130130	MD	MD	110110	130130	120120	100100	130130	MD	120120	130130	110110	MD	100100	120100	MD	MD
SLO19_S59	100100	MD	120120	110110	MD	MD	120120	110110	120120	100100	130130	120120	MD	100100	120120	100100	110110	120120	100100	130130	120120	120120	110110	MD	MD	110110	120120	100120	100100	100100	MD	120120	130130	100100	130130	110110	130130	MD	100100	MD	MD	120120	130130	110110	110110	100100	120120	120120	100100
SLO19_S58	100100	130130	120120	110110	100100	MD	120120	110110	120120	100100	130130	120120	120120	110100	120120	100100	MD	100120	100100	130130	120120	MD	110110	110110	130130	110110	120120	100120	100100	100100	MD	120120	130130	100100	130130	110110	130130	MD	MD	130130	120120	120120	130130	110110	MD	100100	120100	120120	100100
SLO19_S57	100100	130130	120120	110110	MD	110110	120120	110110	120120	MD	130130	120120	120120	100100	120120	100100	110110	100120	100100	130130	120120	120120	130110	110110	130130	110110	120120	100120	100100	100100	MD	120120	130130	100100	130130	110110	130130	MD	MD	130130	MD	120120	130130	110110	110110	100100	120100	120120	100100
SLO19_S55	100100	130130	120120	110110	100100	MD	120120	110110	120120	100100	130130	120120	120120	100100	120120	100100	110110	100100	100100	130130	120120	120120	110110	110110	130130	110110	120120	100120	100100	100100	130130	120120	130130	100100	130130	110110	130130	120120	100100	130130	MD	120120	130130	110110	110110	120100	120100	MD	MD
SLO19_S53	100100	130130	120120	110110	100100	MD	120120	110110	120120	100100	MD	120120	120120	110100	120120	100100	110110	100120	100100	130130	120120	MD	110110	110110	130130	MD	120120	100120	100100	100100	130130	120120	130130	100100	130130	110110	130130	MD	100100	130130	120120	120120	130130	110110	110110	100100	120100	120120	100100
SLO19_S50	100100	130130	120120	110110	100100	110110	120120	110110	120120	MD	130130	120120	120120	110100	120120	100100	110110	120120	100100	130130	120120	120120	110110	110110	130130	110110	MD	120120	100100	100100	130130	120120	130130	MD	130130	110110	130130	120120	MD	130130	120120	100100	130130	110110	110110	100100	MD	120120	100100
SLO19_S49	100100	MD	120120	110110	100100	MD	120120	110110	120120	100100	130130	120120	120120	110100	120120	100100	110110	120120	100100	130130	120120	120120	110110	110110	130130	130110	120120	100120	100100	100100	MD	120120	130130	100100	130130	110110	130130	120120	100100	130130	MD	120120	130130	110110	MD	100100	MD	MD	MD
SLO19_S98	100100	130130	120120	MD	MD	MD	120120	110110	120120	100100	MD	120120	120120	110100	MD	100100	110110	120120	100100	130130	120120	120120	110110	110110	MD	110110	120120	100100	100100	100100	MD	120120	130130	100100	130130	110110	130130	MD	MD	130130	120120	120120	130130	110110	110110	100100	120100	120120	100100
SLO19_S90	100100	130130	120120	110110	100100	110110	120120	110110	120120	100100	MD	120120	120120	110100	120120	100100	110110	100120	100100	130130	120120	MD	MD	110110	130130	110110	120120	100120	100100	100100	130130	120120	130130	100100	130130	110110	130130	120120	100100	130130	MD	120120	130130	110110	110110	100100	120100	MD	100100
SLO19_S85	100100	MD	120120	110110	100100	110110	120120	MD	120120	100100	130130	120120	MD	110100	120120	MD	110110	120120	100100	130130	120120	MD	110110	MD	130130	110110	120120	100120	100100	100100	130130	120120	130130	MD	130130	110110	130130	MD	MD	130130	MD	120120	130130	110110	MD	100100	120100	120120	100100
SLO19_S83	100100	130130	120120	110110	MD	MD	120120	110110	120120	100100	MD	120120	MD	100100	120120	100100	MD	100120	100100	130130	120120	120120	MD	MD	130130	130110	120120	100120	100100	100100	MD	120120	130130	MD	130130	110110	130130	120120	100100	130130	MD	MD	130130	MD	MD	100100	100100	120120	100100
SLO19_S78	100100	MD	120120	110110	100100	110110	120120	110110	120120	100100	130130	120120	120120	110100	120120	100100	110110	120120	100100	130130	120120	MD	110110	MD	MD	110110	120120	100120	100100	100100	MD	120120	130130	100100	130130	110110	130130	120120	100100	130130	120120	120120	130130	110110	MD	120100	120100	120120	100100
SLO19_S77	100100	130130	120120	110110	MD	110110	120120	110110	120120	110110	130130	120120	MD	110100	120120	MD	110110	100100	100100	130130	120120	120120	110110	110110	MD	110110	120120	100100	100100	100100	130130	120120	130130	100100	130130	110110	130130	120120	100100	130130	120120	MD	130130	110110	MD	100100	120100	120120	100100
SLO19_S71	MD	130130	120120	110110	100100	MD	120120	110110	120120	MD	MD	120120	MD	110100	120120	100100	110110	120120	100100	130130	120120	120120	MD	110110	130130	110110	110120	100120	100100	100100	MD	120120	130130	MD	130130	110110	130130	MD	100100	MD	MD	120120	130130	110110	MD	100100	MD	MD	100100
SLO18_S28	100100	130130	120120	110110	100100	MD	120120	110110	120120	100100	130130	120120	120120	MD	120120	100100	110110	100120	100100	130130	120120	120120	110110	110110	130130	110110	120120	100120	100100	MD	130130	120120	130130	MD	130130	110110	130130	120120	100100	130130	MD	120120	130130	110110	110110	100100	100100	120120	MD
SLO18_S27	100100	130130	120120	110110	MD	MD	120120	110110	120120	100100	130130	110120	120120	100100	120120	100100	110110	100100	100100	130130	120120	MD	110110	110110	130130	110110	120120	100120	100100	100100	130130	120120	130130	100100	130130	110110	130130	120120	MD	130130	120120	100120	130130	110110	110110	100100	120100	120120	100100
SLO18_S26	100100	MD	120120	110110	100100	MD	120120	110110	120120	MD	130130	120120	120120	100100	120120	100100	MD	100100	100100	130130	120120	120120	110110	110110	130130	110110	120120	100120	100100	100100	MD	120120	130130	100100	130130	110110	110130	120120	100100	130130	120120	100120	130130	110110	110110	100100	100100	120120	100100
SLO18_S25	MD	130130	120120	110110	MD	110110	120120	110110	120120	100100	MD	120120	120120	100100	120120	100100	110110	100120	100100	130130	120120	120120	110110	MD	MD	110110	120120	MD	100100	MD	130130	MD	130130	MD	130130	110110	130130	MD	100100	130130	120120	MD	130130	110110	110110	120100	120100	MD	100100
SLO18_S24	100100	130130	120120	110110	100100	MD	120120	110110	120120	100100	MD	120120	120120	100100	120120	100100	110110	100120	100100	130130	120120	120120	110110	110110	130130	110110	120120	120120	100100	100100	130130	120120	130130	100100	130130	110110	130130	120120	100100	130130	120120	120120	130130	110110	110110	100100	120100	120120	100100
SLO18_S23	100100	130130	120120	110110	100100	110110	120120	110110	120120	MD	MD	120120	120120	100100	120120	100100	MD	100120	MD	130130	120120	120120	MD	110110	130130	110110	120120	100120	100100	100100	MD	120120	130130	MD	130130	110110	130130	MD	100100	130130	120120	120120	130130	MD	MD	100100	120100	MD	100100
SLO18_S22	120100	MD	120120	110110	MD	110110	120120	110110	120120	100100	130130	120120	120120	100100	120120	100100	MD	100120	MD	130130	120120	120120	MD	MD	130130	110110	120120	100120	100100	MD	MD	MD	130130	100100	130130	110110	130130	MD	100100	130130	120120	120120	130130	MD	110110	MD	MD	MD	100100
SLO18_S21	100100	MD	120120	110110	MD	110110	120120	110110	120120	MD	130130	120120	120120	100100	120120	100100	MD	100120	100100	130130	120120	120120	MD	110110	130130	110110	120120	MD	100100	MD	MD	120120	130130	100100	130130	110110	130130	MD	100100	MD	120120	120120	130130	110110	110110	100100	120100	MD	100100
SLO18_S17	MD	130130	MD	110110	MD	110110	120120	110110	120120	100100	MD	120120	MD	MD	120120	MD	110110	100120	100100	130130	120120	120120	MD	MD	130130	110110	MD	MD	100100	MD	130130	MD	130130	MD	130130	110110	130130	120120	100100	MD	MD	120120	130130	110110	MD	MD	MD	MD	100100
SLO18_S16	100100	130130	120120	MD	MD	110110	120120	110110	120120	100100	MD	120120	MD	110100	120120	100100	MD	MD	100100	130130	120120	120120	MD	MD	130130	110110	120120	MD	100100	100100	130130	120120	130130	100100	130130	110110	130130	120120	MD	130130	MD	MD	130130	110110	110110	MD	MD	120120	100100
SLO18_S13	MD	MD	120120	110110	MD	110110	120120	110110	120120	100100	130130	120120	MD	100100	120120	100100	MD	100120	100100	130130	MD	120120	MD	MD	110130	130110	120120	100120	100100	120120	MD	120120	MD	100100	130130	110110	130130	120120	100100	130130	120120	MD	130130	MD	110110	MD	120120	MD	100100
SLO18_S10	100100	130130	MD	MD	MD	MD	120120	MD	120120	MD	MD	120120	MD	100100	120120	100100	MD	MD	100100	130130	120120	120120	MD	MD	130130	110110	MD	MD	100100	100100	130130	MD	130130	MD	130130	110110	130130	120120	100100	MD	120120	120120	130130	110110	MD	100100	MD	MD	MD
SLO18_S8	100100	MD	120120	110110	100100	110110	120120	110110	120120	100100	130130	120120	120120	110100	120120	100100	110110	100120	100100	130130	120120	120120	MD	110110	130130	MD	120120	100120	110100	MD	130130	120120	130130	100100	130130	110110	130130	MD	100100	130130	MD	120120	130130	110110	110110	MD	MD	120120	100100
SLO18_S6	100100	130130	120120	110110	MD	MD	120120	110110	120120	100100	MD	120120	120120	100100	120120	100100	MD	100120	MD	130130	120120	120120	110110	MD	130130	110110	MD	120120	100100	MD	110130	120120	130130	MD	130130	110110	130130	MD	MD	130130	120120	120120	130130	MD	MD	MD	MD	MD	100100
SLO18_S2	MD	130130	120120	110110	MD	MD	120120	110110	120120	100100	MD	120120	MD	110100	120120	100100	MD	100120	100100	130130	120120	MD	110110	MD	MD	130110	120120	100120	100100	MD	130130	MD	MD	100100	130130	110110	130130	120120	100100	130130	120120	120120	130130	110110	110110	MD	120100	MD	100100
SLO12_S21	100100	130130	120120	110110	100100	110110	120120	110110	120120	100100	MD	120120	120120	110100	120120	100100	110110	100100	100100	130130	120120	120120	110110	MD	130130	130110	120120	120120	100100	100100	130130	120120	130130	100100	MD	110110	130130	120120	MD	130130	120120	120120	130130	110110	110110	100100	120100	120120	100100
SLO12_S22	100100	MD	120120	130110	100100	110110	120120	110110	120120	100100	130130	120120	120120	100100	120120	100100	MD	100100	100100	130130	MD	120120	110110	110110	130130	110110	120120	100120	100100	100100	MD	120120	130130	100100	130130	110110	130130	120120	100100	130130	120120	100120	130130	MD	110110	100100	120100	MD	100100
SLO12_S23	100100	130130	120120	110110	100100	110110	120120	110110	120120	MD	130130	120120	120120	100100	120120	100100	110110	100100	100100	130130	120120	MD	110110	110110	130130	110110	120120	100120	100100	100100	130130	120120	130130	100100	130130	110110	130130	120120	100100	130130	120120	120120	130130	110110	110110	120100	120100	120120	100100
SLO12_S24	100100	130130	120120	110110	100100	MD	120120	110110	120120	100100	130130	120120	120120	110110	120120	100100	110110	120100	110100	130130	120120	120120	110110	MD	130130	110110	120120	MD	100100	100100	130130	120120	130130	100100	130130	110110	130130	MD	100100	130130	120120	120120	130130	110110	MD	100100	120100	120120	100100
SLO12_S25	100100	130130	120120	110110	100100	110110	120120	110110	120120	MD	130130	120120	120120	100100	120120	100100	110110	120100	100100	130130	120120	120120	130110	110110	130130	110110	110120	MD	100100	100100	MD	120120	130130	MD	130130	110110	130130	MD	120100	130130	120120	120120	130130	110110	110110	120100	120100	120120	100100
SLO12_S26	100100	130130	120120	110110	100100	MD	120120	110110	120120	100100	130130	120120	120120	100100	120120	100100	110110	120100	100100	130130	120120	120120	130110	110110	130130	110110	MD	120120	100100	100100	130130	120120	130130	MD	130130	110110	130130	120120	MD	130130	120120	120120	130130	110110	110110	100100	120100	120120	100100
SLO12_S27	100100	130130	120120	110110	100100	110110	120120	110110	120120	100100	MD	120120	100120	100100	120120	100100	110110	100100	100100	130130	120120	120120	110110	110110	MD	110110	120120	100120	100100	100100	MD	120120	130130	100100	130130	110110	130130	120120	MD	130130	120120	120120	130130	110110	MD	100100	120100	120120	100100
SLO12_S28	100100	130130	120120	130110	MD	MD	120120	110110	120120	100100	130130	120120	120120	100100	120120	100100	110110	100100	100100	130130	120120	120120	110110	110110	130130	110110	120120	MD	100100	100100	130130	120120	130130	MD	MD	110110	130130	120120	MD	130130	120120	120120	130130	110110	110110	100100	100100	120120	100100
SLO12_S29	100100	130130	120120	110110	MD	110110	120120	110110	120120	MD	130130	120120	120120	100100	120120	MD	110110	120100	100100	130130	120120	120120	110110	110110	130130	110110	MD	120120	100100	100100	130130	120120	130130	100100	130130	110110	130130	120120	MD	130130	120120	120120	130130	110110	110110	100100	120100	MD	100100
SLO12_S30	100100	130130	120120	130110	100100	110110	100120	110110	120120	100100	130130	110120	120120	110100	120120	MD	MD	120100	100100	130130	120120	120120	110110	110110	130130	110110	120120	120120	100100	100100	MD	120120	130130	100100	130130	110110	130130	120120	MD	130130	120120	120120	130130	110110	110110	100100	120100	120120	100100
SLO12_S31	100100	MD	120120	110110	100100	MD	120120	110110	120120	100100	MD	120120	120120	100100	120120	100100	MD	100100	100100	130130	120120	MD	110110	MD	130130	110110	120120	100120	100100	MD	130130	120120	130130	100100	130130	110110	130130	120120	MD	130130	120120	120120	130130	110110	MD	120100	120100	120120	100100
SLO12_S32	100100	MD	120120	110110	MD	110110	120120	110110	120120	100100	MD	120120	120120	100100	120120	100100	100110	120120	100100	130130	120120	120120	110110	110110	130130	110110	120120	100120	100100	100100	MD	120120	130130	100100	130130	110110	130130	120120	MD	130130	120120	120120	130130	110110	110110	100100	100100	120120	100100
SLO12_S33	100100	MD	120120	110110	MD	110110	120120	110110	120120	MD	MD	120120	120120	110100	120120	100100	MD	120100	100100	130130	120120	120120	110110	MD	130130	110110	120120	100120	100100	100100	130130	120120	130130	MD	130130	110110	130130	MD	100100	130130	120120	120120	130130	110110	110110	100100	120100	120120	100100
SLO12_S34	100100	130130	120120	110110	MD	MD	120120	110110	120120	MD	130130	120120	120120	110100	120120	100100	110110	120120	100100	130130	120120	120120	110110	110110	130130	110110	120120	100120	100100	100100	130130	120120	130130	100100	130130	110110	130130	120120	100100	130130	120120	100120	130130	110110	110110	100100	100100	120120	100100
SLO12_S35	100100	130130	120120	110110	MD	110110	120120	110110	120120	100100	130130	120120	120120	110110	120120	100100	MD	120100	100100	130130	120120	120120	130110	110110	130130	130110	120120	120120	100100	100100	130130	120120	130130	100100	130130	110110	130130	120120	100100	130130	MD	120120	130130	110110	MD	100100	120100	120120	100100
SLO12_S36	100100	130130	120120	110110	100100	MD	120120	110110	120120	100100	110130	120120	120120	100100	MD	100100	100110	100100	100100	130130	120120	120120	110110	110110	130130	110110	120120	MD	100100	100100	MD	120120	130130	MD	130130	110110	130130	120120	100100	130130	MD	120120	130130	110110	110110	100100	100100	120120	100100
SLO12_S37	100100	130130	120120	110110	MD	110110	120120	110110	120120	100100	130130	120120	120120	100100	120120	100100	110110	120100	100100	130130	120120	120120	MD	110110	130130	110110	120120	120120	100100	100100	MD	120120	130130	100100	130130	110110	130130	120120	100100	130130	120120	120120	130130	110110	MD	100100	120100	120120	100100
SLO12_S38	100100	130130	120120	110110	100100	110110	120120	110110	120120	MD	130130	120120	120120	100100	120120	100100	MD	100100	100100	130130	120120	120120	110110	MD	130130	110110	120120	120120	100100	120100	MD	120120	130130	100100	110130	110110	130130	120120	MD	130130	120120	120120	130130	110110	110110	100100	120100	120120	100100
SLO12_S39	100100	130130	120120	130110	100100	MD	120120	110110	120120	100100	130130	120120	120120	100100	110120	100100	MD	120120	100100	130130	120120	120120	110110	110110	130130	110110	120120	100120	100100	100100	130130	120120	130130	100100	130130	110110	130130	120120	100100	130130	120120	MD	130130	110110	110110	100100	120100	120120	100100
SLO12_S40	100100	MD	120120	110110	MD	110110	120120	110110	120120	100100	MD	120120	120120	110100	120120	100100	100100	100100	100100	130130	120120	MD	110110	110110	130130	130110	120120	100120	100100	100100	130130	120120	130130	100100	130130	110110	130130	120120	100100	130130	MD	120120	130130	110110	110110	100100	120100	120120	100100
SSA12_S1	100100	130130	120120	110110	MD	110110	120120	110110	120120	100100	MD	120120	120120	100100	120120	100100	110110	120120	100100	130130	120120	MD	110110	110110	130130	130110	120120	100120	100100	100100	130130	120120	130130	100100	130130	110110	130130	120120	100100	130130	120120	120120	130130	110110	110110	100100	120100	120120	100100
SSA12_S2	100100	130130	120120	110110	100100	110110	120120	110110	120120	MD	130130	120120	120120	100100	120120	100100	MD	120100	100100	130130	120120	120120	110110	110110	130130	110110	120120	100120	100100	100100	130130	120120	130130	100100	130130	110110	130130	120120	100100	130130	MD	120120	130130	110110	110110	120100	120100	120120	100100
SSA12_S3	100100	130130	120120	110110	MD	110110	120120	110110	120120	100100	130130	120120	120120	100100	120120	100100	110110	100100	100100	130130	120120	120120	110110	MD	130130	110110	110120	100120	100100	MD	MD	120120	130130	MD	130130	110110	130130	120120	100100	130130	120120	120120	130130	110110	110110	100100	100100	120120	100100
SSA12_S4	100100	130130	120120	110110	100100	110110	120120	110110	120120	100100	130130	120120	120120	110100	120120	100100	110110	120100	100100	130130	120120	120120	130110	110110	MD	110110	120120	100120	100100	100100	130130	120120	130130	100100	130130	110110	130130	120120	MD	130130	MD	120120	130130	MD	MD	100100	100100	120120	100100
SSA12_S5	100100	130130	120120	110110	100100	MD	120120	110110	120120	100100	130130	120120	120120	110100	120120	100100	110110	100100	100100	130130	120120	MD	110110	110110	130130	130110	MD	120120	100100	100100	130130	120120	130130	MD	130130	110110	130130	120120	100100	130130	MD	120120	130130	110110	110110	100100	100100	120120	100100
SSA12_S6	100100	130130	120120	110110	100100	110110	120120	110110	120120	100100	MD	120120	100120	100100	120120	100100	110110	100100	100100	130130	120120	120120	110110	110110	130130	130110	110120	100120	100100	100100	130130	120120	130130	100100	130130	110110	110130	120120	100100	130130	120120	120120	130130	110110	110110	100100	120100	120120	100100
SSA12_S7	100100	130130	120120	110110	MD	110110	120120	110110	120120	100100	MD	120120	120120	110100	120120	100100	MD	100100	100100	130130	120120	120120	110110	110110	130130	110110	120120	100120	100100	100100	130130	120120	130130	MD	130130	110110	130130	MD	100100	130130	120120	120120	130130	110110	110110	120100	120100	120120	100100
SSA12_S8	100100	130130	120120	110110	100100	110110	120120	110110	120120	100100	130130	120120	120120	100100	120120	100100	110110	120100	100100	130130	120120	120120	110110	110110	MD	110110	MD	120120	100100	100100	130130	120120	130130	100100	130130	110110	130130	MD	100100	130130	MD	120120	130130	110110	110110	100100	100100	120120	100100
SSA12_S9	100100	130130	120120	110110	100100	MD	120120	110110	120120	100100	130130	120120	120120	100100	120120	100100	110110	120120	100100	130130	120120	120120	130110	110110	MD	110110	120120	MD	100100	100100	130130	120120	130130	100100	130130	110110	130130	120120	MD	130130	120120	120120	130130	110110	110110	100100	MD	120120	100100
SSA12_S10	100100	MD	120120	110110	100100	110110	120120	110110	120120	100100	110130	120120	120120	110100	120120	100100	100110	120100	100100	130130	120120	120120	130110	110110	130130	110110	120120	MD	100100	100100	110130	120120	130130	100100	130130	110110	130130	120120	MD	130130	MD	120120	130130	110110	110110	100100	120100	120120	100100
SSA12_S11	100100	130130	120120	110110	MD	110110	120120	110110	120120	MD	130130	120120	120120	110100	120120	100100	MD	120100	100100	130130	120120	120120	MD	110110	130130	110110	120120	100120	100100	100100	130130	120120	130130	100100	130130	110110	130130	MD	100100	130130	MD	120120	130130	110110	110110	100100	120100	120120	100100
SSA12_S12	100100	MD	120120	110110	100100	110110	120120	110110	120120	100100	130130	120120	MD	100100	120120	MD	110110	MD	100100	130130	MD	MD	MD	110110	MD	110110	120120	100120	100100	MD	MD	120120	130130	100100	MD	110110	130130	MD	MD	MD	MD	120120	130130	MD	110110	100100	MD	120120	100100
SSA12_S13	100100	MD	120120	110110	MD	110110	120120	MD	120120	MD	130130	120120	100120	110100	120120	100100	110110	120100	100100	130130	120120	120120	110110	110110	MD	110110	120120	MD	100100	100100	130130	120120	130130	100100	130130	110110	130130	120120	MD	130130	120120	120120	130130	110110	110110	100100	120100	120120	100100
SSA12_S16	MD	MD	120120	110110	100100	MD	120120	110110	120120	100100	MD	120120	MD	100100	120120	MD	MD	MD	MD	MD	110120	120120	MD	MD	MD	110110	MD	MD	MD	MD	MD	MD	MD	MD	130130	110110	130130	120120	MD	MD	MD	MD	130130	MD	MD	100100	MD	MD	MD
SSA12_S17	100100	MD	120120	110110	100100	MD	120120	110110	120120	100100	130130	120120	120120	100100	120120	100100	MD	100100	100100	130130	120120	120120	110110	110110	130130	110110	120120	100120	100100	120120	130130	120120	130130	MD	130130	110110	130130	120120	120100	130130	120120	MD	130130	110110	110110	100100	MD	120120	100100
SSA12_S18	120100	130130	120120	110110	MD	110110	120120	110110	120120	100100	130130	120120	120120	110100	120120	120120	110110	120120	100100	130130	120120	120120	130130	110110	130130	110110	120120	100120	100100	120100	130130	120120	130130	MD	130130	110110	130130	120120	100100	130130	120120	120120	130130	110110	110110	100100	100100	120120	100100
SSA12_S19	100100	130130	120120	110110	100100	110110	120120	110110	120120	100100	130130	120120	120120	100100	120120	100100	110110	120100	100100	130130	120120	120120	110110	110110	130130	130110	120120	100120	100100	100100	130130	120120	130130	100100	130130	110110	130130	MD	100100	130130	120120	120120	130130	110110	110110	100100	120100	120120	100100
SSA12_S20	100100	130130	120120	110110	100100	110110	120120	110110	120120	100100	130130	120120	120120	100100	120120	100100	110110	100100	100100	130130	120120	120120	110110	110110	130130	110110	120120	100120	100100	100100	130130	120120	130130	100100	130130	110110	130130	120120	MD	MD	120120	120120	130130	110110	MD	100100	100100	120120	100100
[truncated: 5,000 more columns]

## Sheet: Supplementary table 2
Table S2: Outlier SNPs for divergent selection detected in Cerastoderma edule in response to Marteilia cochillia with the F-DIST method implemented in ARLEQUIN 3.5 in the temporal (naïve (2012) vs affected (2018-2019)) and exposure scenarios, respectively. Non exposed (SSA12, SLO12, SLO18), exposed (SLO19) samples.
Temporal SNP_ID	Chr	Position (bp)		Exposure SNP_ID	Chr	Position (bp)		Shared
156290_4	1	302749		164345_7	1	3171969		88118_16
27424_24	1	11091618		245433_30	1	4092832		30364_7
152630_16	1	21765580		220432_34	1	4677978		244689_11
300124_3	1	36963849		256979_4	1	26665237		215174_5
152461_17	1	37437611		277767_2	1	36175473		268319_32
109996_19	1	50033999		81194_27	1	42553301		245986_32
172379_8	2	7331175		134501_17	1	47981769		166194_34
297210_2	2	14220375		109595_3	1	50991963		40205_7
270375_0	2	32784443		85214_26	2	1512288		256794_35
42856_5	2	50514453		163778_3	2	5165780		233444_3
43595_6	2	52374200		188380_3	2	8211430		191522_7
121465_32	3	18148873		96907_26	2	9710928		126933_19
109333_4	3	20403026		67285_19	2	16282032		263498_8
63615_0	3	30894343		77466_0	2	30939756		221361_4
185992_6	3	52822008		277226_18	2	32038099		238043_27
159561_9	3	55934794		239919_19	2	32220984		283727_2
1801_9	4	12109901		240779_29	2	38933736		32590_17
30364_7	4	25401411		240764_18	2	39016301
221361_4	4	29246635		209886_33	2	53376997
194167_0	4	32590437		173598_25	3	854775
256533_0	4	38129652		65083_35	3	1998611
238043_27	4	41694192		181317_18	3	5325144
135968_15	4	50936177		209292_33	3	10407569
191522_7	5	6722360		209311_11	3	10539463
182698_17	5	7332544		90362_1	3	13410301
39442_34	5	23254047		118937_15	3	18728398
40205_7	5	24916092		118815_35	3	19006613
222185_33	5	25489700		118718_26	3	19248002
166822_3	5	34008325		118430_34	3	19925455
270079_29	5	35790787		63308_9	3	30132139
88559_25	5	36827791		41466_30	3	36703620
44202_32	5	42090317		294631_17	3	38109787
259542_9	6	8587257		266237_7	3	42221723
206963_8	6	9943132		113630_19	3	50080228
179487_19	6	15847998		277046_33	4	19520
23751_0	6	38614332		286992_29	4	17725506
269486_0	7	21910000		119963_19	4	18776456
180690_0	7	29321354		30364_7	4	25401411
225944_35	8	11723893		221361_4	4	29246635
217999_31	8	14445172		19806_17	4	30868560
136636_15	8	21903346		29000_27	4	33936846
285008_5	8	23212049		29525_26	4	35216775
166340_28	8	24842182		257814_31	4	39787687
208130_0	8	30666905		238043_27	4	41694192
256794_35	10	14344258		105825_35	5	2810827
233444_3	10	15677896		191522_7	5	6722360
142051_2	10	18330041		117309_4	5	16875429
142010_20	10	18474986		64453_30	5	19503756
255888_35	10	19786344		40205_7	5	24916092
84100_31	10	20829424		199883_10	5	29772446
234122_25	10	37058575		281532_17	5	30772847
32590_17	11	5177924		268859_27	5	32371449
244689_11	12	11540083		286645_5	5	35551315
215174_5	12	18315989		88641_20	5	36588953
126933_19	12	28518329		278835_34	5	39289315
171912_27	12	32483728		44413_9	5	42607468
268319_32	13	8706747		19288_27	5	47294897
149069_19	14	4017350		186932_25	5	50588397
291260_18	14	10814960		65481_3	6	7757020
166194_34	15	5002997		189036_24	6	10765797
88118_16	15	13199057		290242_28	6	16543942
60573_4	15	18250825		288158_4	6	23630415
245986_32	15	19221254		68801_17	6	34251609
138239_30	15	25598713		127038_2	7	964487
314040_9	15	27669397		184559_32	7	2881173
283727_2	16	4495504		203379_2	7	23126826
181856_18	16	16597810		135110_9	7	24287325
45581_8	17	1657437		195063_3	7	26840348
294497_25	17	4573773		52912_17	8	833937
263423_32	18	16930883		136710_10	8	21731386
263498_8	18	17284544		136533_0	8	22273380
190597_27	19	17084228		248257_1	8	28249364
83241_35	19	19121785		38051_24	8	32289884
85763_9	HiC_scaffold_57	43426		13580_33	9	12460482
				55112_10	9	28346375
				133759_15	9	30724664
				177021_0	9	37681033
				37532_4	10	85175
				37391_9	10	573280
				262598_29	10	10960478
				256794_35	10	14344258
				233444_3	10	15677896
				233383_3	10	15803021
				300835_27	10	27375161
				46695_20	10	31555910
				91812_4	10	33570000
				91435_9	10	34378298
				310078_26	11	786470
				236221_31	11	1179792
				32590_17	11	5177924
				247331_33	11	20861799
				110873_1	11	31038823
				244689_11	12	11540083
				215174_5	12	18315989
				41967_1	12	18947011
				252899_33	12	23937987
				126739_1	12	27853864
				126878_4	12	28340576
				126933_19	12	28518329
				93813_7	12	29907116
				94393_31	12	31455769
				73715_8	13	2122489
				268319_32	13	8706747
				223753_4	13	11945836
				150043_35	13	12489700
				70511_15	13	19500764
				289930_16	13	22164728
				159542_18	13	24820164
				250433_2	13	26740944
				151683_1	13	27651097
				151694_31	13	27681526
				280145_29	14	2391163
				247954_35	14	18017264
				189805_32	14	20522861
				189681_20	14	20796540
				286203_16	14	23238435
				146461_31	14	24563619
				146665_1	14	25340423
				100113_11	14	27061080
				166194_34	15	5002997
				131240_20	15	6617947
				130904_2	15	7410237
				11815_0	15	7834040
				87402_31	15	11439763
				88118_16	15	13199057
				224501_24	15	14390860
				60797_28	15	17599837
				245986_32	15	19221254
				72282_10	15	20484212
				314043_24	15	27660909
				216642_7	15	31089089
				231952_8	16	3785839
				283727_2	16	4495504
				298282_4	16	7526941
				174455_5	16	22681685
				248576_10	16	29425192
				130781_35	16	31379392
				45662_19	17	1828461
				46267_18	17	4021950
				46277_27	17	4022581
				238552_6	17	8867038
				222610_17	17	9772844
				307940_1	17	12570967
				85707_24	18	4658761
				295938_15	18	6879734
				185610_1	18	15244382
				314839_11	18	17054167
				263498_8	18	17284544
				258399_24	18	17697950
				310228_17	18	18930345
				3763_4	19	5088500
				138862_2	19	14285868
				293683_6	19	19296724
				45367_29	HiC_scaffold_60	79935
				254511_20	HiC_scaffold_65	74977
				293388_19	HiC_scaffold_801	5664

## Sheet: Supplementary table 3
Table S3: 9,046 Cerastoderma edule genes from cockle's transcriptome (Pardo et al., 2022), along with the SNPs from 2b-RADseq from the population genomics analysis. Highlighted with regard to their response or association with Marteilia cochillia exposure from the population genomics and transcriptomic approaches: GRAY (767 differentially expressed genes (DEG) from Pardo et al., 2022); PURPLE (12…
Chr	Gene_start / SNP posistion	Gene end / SNP ID	E-value / FST	FST p-value	Annotation
1	646	1945	5e-47		LOW QUALITY PROTEIN: P2X purinoceptor 7-like n=1 Tax=Pecten maximus TaxID=6579 RepID=UPI001458F5B0
1	95663	101036	1e-16		hemicentin-2-like n=1 Tax=Mizuhopecten yessoensis TaxID=6573 RepID=UPI000B45BD06
1	102831	105536	9e-147		nephrin-like n=1 Tax=Pecten maximus TaxID=6579 RepID=UPI0014586D9B
1	125413	156324_19
1	125570	156323_33
1	191667	156315_32
1	195695	156313_3
1	196989	156312_19
1	197413	156311_27
1	301457	156291_8
1	302734	156289_29
1	302749	156290_4	0.0968477	0.00621282
1	307581	347806	0		C-1-tetrahydrofolate synthase, cytoplasmic n=2 Tax=Crassostrea TaxID=6564 RepID=UPI00148A8B97
1	351067	358752	0		enhancer of rudimentary homolog n=2 Tax=Crassostrea TaxID=6564 RepID=UPI0005C3C55F
1	380424	385810	8e-137		Sperm protein (Fragment) n=1 Tax=Haliotis fulgens TaxID=6456 RepID=M9WF07_HALFU
1	382850	156278_33
1	438726	480400	5e-19		E3 ubiquitin-protein ligase HECTD1-like isoform X5 n=1 Tax=Pecten maximus TaxID=6579 RepID=UPI001458F7DF
1	452438	156269_28
1	555709	156241_25
1	557250	588472	3e-80		FERM domain-containing protein 6 n=2 Tax=Pectinidae TaxID=6566 RepID=A0A210QYK1_MIZYE
1	588538	654322	5e-143		thyroid adenoma-associated protein homolog isoform X1 n=4 Tax=Pecten maximus TaxID=6579 RepID=UPI001457FE98
1	656627	683804	2e-58		RNA-binding protein lark-like isoform X4 n=1 Tax=Mizuhopecten yessoensis TaxID=6573 RepID=UPI000B45F8C3
1	657118	156232_34
1	693735	156226_27
1	716289	156223_30
1	716425	156222_5
1	723261	156221_18
1	753527	156215_10
1	754377	156212_30
1	754386	156211_31
1	786455	810452	0		Protein transport protein SEC23 n=8 Tax=Pectinidae TaxID=6566 RepID=A0A210PM60_MIZYE
1	810438	156201_11
1	814637	156197_1
1	852451	886728	1e-180		WD repeat-containing protein 64-like n=1 Tax=Lingula unguis TaxID=7574 RepID=A0A1S3HIW5_LINUN
1	912511	933359	8e-64		Threonine aspartase 1 n=3 Tax=Mizuhopecten yessoensis TaxID=6573 RepID=A0A210PM77_MIZYE
1	922871	239027_15
1	954553	1003350	5e-102		WD repeat-containing protein 64-like n=1 Tax=Lingula unguis TaxID=7574 RepID=A0A1S3HIW5_LINUN
1	1066558	239010_3
1	1129394	239006_4
1	1195696	1216118	2e-13		kelch domain-containing protein 2-like n=1 Tax=Lingula unguis TaxID=7574 RepID=A0A1S3JY85_LINUN
1	1262441	1344698	0		Non-specific serine/threonine protein kinase n=13 Tax=Pectinidae TaxID=6566 RepID=A0A210Q4P3_MIZYE
1	1332751	238974_20
1	1353575	238968_4
1	1356484	1399978	0		PALP domain-containing protein n=1 Tax=Lottia gigantea TaxID=225164 RepID=V3ZFN0_LOTGI
1	1403140	1425633	2e-50		Neuronal PAS domain-containing protein 4 n=2 Tax=Mizuhopecten yessoensis TaxID=6573 RepID=A0A210R459_MIZYE
1	1439520	238952_6
1	1439701	238950_27
1	1451653	1550511	0		Exonuclease 1 n=2 Tax=Mizuhopecten yessoensis TaxID=6573 RepID=A0A210Q4T9_MIZYE
1	1454813	238939_28
1	1471421	238929_34
1	1522262	238916_6
1	1542333	238914_20
1	1605012	1606834	0		XK-related protein n=1 Tax=Branchiostoma floridae TaxID=7739 RepID=C3Z9D9_BRAFL
1	1631224	1680900	0		Protein YIPF n=2 Tax=Crassostrea gigas TaxID=29159 RepID=K1RBB7_CRAGI
1	1638865	262703_10
1	1644014	262708_11
1	1722789	1740152	7e-44		kelch-like protein diablo n=1 Tax=Crassostrea virginica TaxID=6565 RepID=UPI000BB02E72
1	1785175	262728_29
1	1785334	262729_6
1	1785984	262734_9
1	1786186	262736_17
1	1793022	262763_4
1	1793522	262765_34
1	1853936	1931545	0		Cyclin-dependent kinase-like 1 n=4 Tax=Crassostrea TaxID=6564 RepID=K1PMP9_CRAGI
1	1887423	262773_27
1	1887608	262774_0
1	1887613	262775_1
1	1890312	262776_18
1	2055446	294174_28
1	2120836	2121536	3e-23		Reverse transcriptase domain-containing protein (Fragment) n=1 Tax=Thiothrix sp. TaxID=1032 RepID=A0A432UXB6_9GAMM
1	2147820	315005_8
1	2152890	315003_24
1	2162007	315002_6
1	2162056	2162793	3e-17		Exodeoxyribonuclease III n=2 Tax=Bathymodiolus brooksi thiotrophic gill symbiont TaxID=1052209 RepID=A0A482YMS4_9BACT
1	2163256	2164569	2e-87		Exodeoxyribonuclease III n=1 Tax=Bathymodiolus brooksi thiotrophic gill symbiont TaxID=1052209 RepID=A0A482YUR2_9BACT
1	2181678	314998_31
1	2185556	314996_29
1	2196413	241524_25
1	2204813	2205664	0		DUF4817 domain-containing protein n=1 Tax=invertebrate metagenome TaxID=1711999 RepID=A0A2H9T2F8_9ZZZZ
1	2207004	241525_17
1	2245967	2250483	0		Ubiquitin conjugation factor E4 B n=3 Tax=Pectinidae TaxID=6566 RepID=A0A210R349_MIZYE
1	2297691	2309170	5e-78		ATP-dependent DNA helicase PIF1 n=1 Tax=Exaiptasia pallida TaxID=1720309 RepID=UPI00109B83B9
1	2302247	184771_26
1	2379178	184778_1
1	2520455	164464_24
1	2561463	164455_33
1	2580251	164452_16
1	2627138	164444_26
1	2640061	164439_31
1	2663856	2727357	9e-103		EGF-like domain-containing protein n=1 Tax=Polysphondylium pallidum (strain ATCC 26659 / Pp 5 / PN500) TaxID=670386 RepID=D3BG27_POLPP
1	2664536	164435_29
1	2744148	164424_24
1	2754790	164422_6
1	2768180	2780441	1e-177		Netrin receptor UNC5B n=2 Tax=Mizuhopecten yessoensis TaxID=6573 RepID=A0A210QXR1_MIZYE
1	2794568	2803023	0		C-terminal peptide n=3 Tax=Mizuhopecten yessoensis TaxID=6573 RepID=A0A210PM66_MIZYE
1	2804212	164416_3
1	2806819	2835391	0		protein-cysteine N-palmitoyltransferase HHAT-like n=1 Tax=Pecten maximus TaxID=6579 RepID=UPI001458A7CF
1	2828006	164409_33
1	2845836	2894698	9e-66		Potassium voltage-gated channel protein eag n=3 Tax=Pectinidae TaxID=6566 RepID=A0A210PIZ4_MIZYE
1	2926820	164394_3
1	2940204	164393_28
1	2940444	164392_28
1	2950381	2954981	6e-128		interferon-inducible GTPase 5-like n=1 Tax=Chrysemys picta bellii TaxID=8478 RepID=UPI000388DB23
1	2967535	2981806	6e-107		Potassium channel subfamily K member 2 n=2 Tax=Mizuhopecten yessoensis TaxID=6573 RepID=A0A210QRV6_MIZYE
1	3099248	164368_1
1	3100765	164367_11
1	3149072	3172249	0		aftiphilin-like isoform X1 n=11 Tax=Pecten maximus TaxID=6579 RepID=UPI001458061B
1	3149604	164353_5
1	3171969	164345_7	0.0857811	0.00471564
1	3197168	3220674	3e-49		REST corepressor 3 isoform X1 n=7 Tax=Crassostrea TaxID=6564 RepID=UPI0005C38195
1	3220729	3238794	0		AAA domain-containing protein n=13 Tax=Mollusca TaxID=6447 RepID=A0A2C9JT21_BIOGL
1	3259734	3260044	0		2OG-Fe(II) oxygenase n=8 Tax=Xanthomonas oryzae TaxID=347 RepID=UPI0012D2FFB5
1	3281775	164325_9
1	3284814	3314411	1e-100		Integrator complex subunit 7 n=3 Tax=Pectinidae TaxID=6566 RepID=A0A210R012_MIZYE
1	3316656	3341297	2e-89		Metastasis-associated protein MTA1 n=4 Tax=Crassostrea TaxID=6564 RepID=K1P5F7_CRAGI
1	3320063	164321_28
1	3325193	164320_16
1	3349206	164314_3
1	3449779	164286_28
1	3456050	3457146	0		transmembrane emp24 domain-containing protein 7-like n=1 Tax=Crassostrea gigas TaxID=29159 RepID=UPI00148A8CCF
1	3460260	164283_20
1	3460598	3476131	6e-80		G patch domain-containing protein 2 n=5 Tax=Pectinidae TaxID=6566 RepID=A0A210PU76_MIZYE
1	3477748	164279_5
1	3481988	3510828	0		protein UXT-like n=1 Tax=Crassostrea virginica TaxID=6565 RepID=UPI000BB0BA01
1	3483019	164277_35
1	3492064	164275_4
1	3521948	3526450	2e-108		BTB domain-containing protein (Fragment) n=1 Tax=Capitella teleta TaxID=283909 RepID=R7UFG5_CAPTE
1	3559121	3651204	6e-84		kinesin light chain isoform X7 n=4 Tax=Crassostrea TaxID=6564 RepID=UPI0005C35BCA
1	3613667	164263_35
1	3622498	164260_19
1	3637073	164255_30
1	3648749	164252_2
1	3650147	164251_3
1	3696793	164241_17
1	3697356	164240_27
1	3725031	164233_29
1	3725032	164234_18
1	3761663	164221_31
1	3802619	164208_8
1	3802786	164207_26
1	3803634	164206_3
1	3833560	245515_19
1	3857160	245512_4
1	3904522	245498_17
1	3915690	3916292	2e-162		LOW QUALITY PROTEIN: putative uncharacterized protein FLJ37770 n=1 Tax=Meriones unguiculatus TaxID=10047 RepID=UPI000B4FC34F
1	3928661	4050084	6e-37		centrosomal protein of 170 kDa-like isoform X1 n=20 Tax=Crassostrea virginica TaxID=6565 RepID=UPI000BB093C3
1	3940149	245488_0
1	4065312	245443_2
1	4083976	4094179	0		Rho-related GTP-binding protein RhoQ n=2 Tax=Pectinidae TaxID=6566 RepID=A0A210Q9Q6_MIZYE
1	4089258	245435_0
1	4091071	245434_31
1	4092832	245433_30	0.0829238	0.00671213
1	4113965	4119467	0		Tripartite motif-containing protein 56 n=2 Tax=Crassostrea TaxID=6564 RepID=K1QPP1_CRAGI
1	4116008	220619_29
1	4144666	4161719	9e-21		Solute carrier family 22 member 5 n=1 Tax=Mizuhopecten yessoensis TaxID=6573 RepID=A0A210QE60_MIZYE
1	4174630	220598_34
1	4211143	4212506	0		Tripartite motif-containing protein 56 n=2 Tax=Crassostrea TaxID=6564 RepID=K1QPP1_CRAGI
1	4234496	4241750	3e-103		Calmodulin n=1 Tax=Serendipita indica (strain DSM 11827) TaxID=1109443 RepID=G4TIQ3_SERID
1	4254066	4307318	2e-78		Transmembrane protein C1orf95-like n=2 Tax=Pectinidae TaxID=6566 RepID=A0A210Q6Q2_MIZYE
1	4318858	220545_34
1	4378882	220525_27
1	4419317	220512_6
1	4431590	220505_17
1	4437970	220503_27
1	4438311	220496_29
1	4438375	220495_8
1	4447915	4463472	0		SNW domain-containing protein 1 n=2 Tax=Pectinidae TaxID=6566 RepID=A0A210QU95_MIZYE
1	4546701	4567218	2e-11		Stress-induced-phosphoprotein 1 n=5 Tax=Crassostrea gigas TaxID=29159 RepID=K1PBB1_CRAGI
1	4572553	220470_5
1	4632659	4651263	4e-53		LOW QUALITY PROTEIN: steryl-sulfatase-like n=1 Tax=Pecten maximus TaxID=6579 RepID=UPI001458F17B
1	4677978	220432_34	0.0902873	0.00636893
1	4774114	220363_3
1	4829281	4840645	5e-65		thiosulfate sulfurtransferase-like n=2 Tax=Crassostrea virginica TaxID=6565 RepID=UPI000BAEA4CD
1	4856203	4867629	0		Calmodulin (Fragment) n=1 Tax=Trichinella pseudospiralis TaxID=6337 RepID=A0A0V0XXP7_TRIPS
1	4905438	220599_5
1	4913154	4916635	0		perlucin-like isoform X2 n=1 Tax=Mizuhopecten yessoensis TaxID=6573 RepID=UPI000B45A347
1	4925154	4966531	0		TPR_REGION domain-containing protein n=1 Tax=Mizuhopecten yessoensis TaxID=6573 RepID=A0A210QFF3_MIZYE
1	5021066	5030053	3e-127		LOW QUALITY PROTEIN: ectonucleoside triphosphate diphosphohydrolase 5-like n=1 Tax=Crassostrea virginica TaxID=6565 RepID=UPI000BAF6AA9
1	5058294	5061632	1e-99		palmitoyltransferase ZDHHC22-like isoform X1 n=1 Tax=Mizuhopecten yessoensis TaxID=6573 RepID=UPI000B45B6C4
1	5062886	129874_28
1	5072794	129869_11
1	5102957	5189117	7e-115		Kinesin-related protein 1 n=8 Tax=Crassostrea gigas TaxID=29159 RepID=K1RQU8_CRAGI
1	5190602	5194317	4e-162		Neuropeptide FF receptor 1 n=2 Tax=Mizuhopecten yessoensis TaxID=6573 RepID=A0A210QLF1_MIZYE
1	5355515	5374906	4e-155		receptor-type tyrosine-protein phosphatase mu-like n=1 Tax=Crassostrea gigas TaxID=29159 RepID=UPI0005C3C92C
1	5378754	5379485	5e-23		multiple epidermal growth factor-like domains protein 10 n=1 Tax=Crassostrea virginica TaxID=6565 RepID=UPI000BAF2768
1	5411618	129670_35
1	5522667	129604_18
1	5567717	129594_30
1	5568621	5604126	2e-84		Tripartite motif-containing protein 56 n=2 Tax=Crassostrea TaxID=6564 RepID=K1QPP1_CRAGI
1	5576850	129590_25
1	5643997	5655278	3e-86		E3 ubiquitin-protein ligase TRIM68-like n=1 Tax=Pecten maximus TaxID=6579 RepID=UPI001458FA2B
1	5664570	5680641	6e-118		Methyltranfer_dom domain-containing protein n=2 Tax=Mizuhopecten yessoensis TaxID=6573 RepID=A0A210PU56_MIZYE
1	5687245	5732039	1e-58		protein DEFECTIVE IN EXINE FORMATION 1-like isoform X1 n=3 Tax=Crassostrea virginica TaxID=6565 RepID=UPI000BAFE8DF
1	5828259	5902919	0		Patatin-like phospholipase domain-containing protein 7 n=11 Tax=Pectinidae TaxID=6566 RepID=A0A210Q533_MIZYE
1	5868630	309099_31
1	5920349	5923296	1e-07		HECT domain-containing protein n=1 Tax=Biomphalaria glabrata TaxID=6526 RepID=A0A2C9M731_BIOGL
1	5993658	6049348	5e-102		tubulin-specific chaperone E-like n=1 Tax=Crassostrea virginica TaxID=6565 RepID=UPI000BAF192E
1	6012563	309163_19
1	6041914	309181_16
1	6101055	6150006	1e-53		Tripartite motif-containing protein 56 n=2 Tax=Crassostrea TaxID=6564 RepID=K1QPP1_CRAGI
1	6212112	148336_17
1	6258838	148314_19
1	6266198	148311_2
1	6278380	148302_35
1	6308928	6366918	6e-169		dnaJ homolog subfamily C member 5B-like n=1 Tax=Crassostrea virginica TaxID=6565 RepID=UPI000BAFA456
1	6333165	148286_15
1	6437033	6479414	0		Multidrug resistance-associated protein 1 n=2 Tax=Mizuhopecten yessoensis TaxID=6573 RepID=A0A210QXH6_MIZYE
1	6544165	6599830	0		E3 ubiquitin-protein ligase n=3 Tax=Pectinidae TaxID=6566 RepID=A0A210R025_MIZYE
1	6601552	6614301	1e-180		disintegrin and metalloproteinase domain-containing protein 10 n=1 Tax=Lingula unguis TaxID=7574 RepID=A0A1S3H064_LINUN
1	6611865	148154_16
1	6686022	6712037	0		ML domain-containing protein n=1 Tax=Biomphalaria glabrata TaxID=6526 RepID=A0A2C9K6Y1_BIOGL
1	6737245	6864128	0		Protein sprint n=4 Tax=Mizuhopecten yessoensis TaxID=6573 RepID=A0A210QEN6_MIZYE
1	6908920	6916404	7e-87		palmitoyltransferase ZDHHC22-like n=2 Tax=Pecten maximus TaxID=6579 RepID=UPI00145868CB
1	6916447	6933584	0		UBX domain-containing protein 1-like n=1 Tax=Crassostrea virginica TaxID=6565 RepID=UPI000BAF1D8D
1	6963543	6997001	0		sphingosine-1-phosphate phosphatase 2-like n=1 Tax=Pecten maximus TaxID=6579 RepID=UPI0014580625
1	7012343	7082159	6e-37		T-complex protein 1 subunit delta n=2 Tax=Pectinidae TaxID=6566 RepID=A0A210PXL7_MIZYE
1	7059322	17705_29
1	7176816	7181144	0		Reverse transcriptase domain-containing protein n=3 Tax=Paroedura picta TaxID=143630 RepID=A0A402EGP3_9SAUR
1	7205404	7236230	1e-175		Carb-bd_dom_fam9 domain-containing protein n=1 Tax=Mizuhopecten yessoensis TaxID=6573 RepID=A0A210QNS7_MIZYE
1	7237066	7262980	0		Carb-bd_dom_fam9 domain-containing protein n=1 Tax=Lottia gigantea TaxID=225164 RepID=V3ZFT0_LOTGI
1	7292870	7334344	2e-58		Probable methylmalonate-semialdehyde dehydrogenase [acylating], mitochondrial n=1 Tax=Daphnia magna TaxID=35525 RepID=A0A0P5L3D6_9CRUS
1	7310880	235685_31
1	7528659	7559145	4e-47		dimethylaniline monooxygenase [N-oxide-forming] 2-like n=1 Tax=Pecten maximus TaxID=6579 RepID=UPI0014583BD8
1	7616615	235526_20
1	7661516	235496_24
1	7691505	235485_34
1	7719963	7737095	7e-143		Copper chaperone for superoxide dismutase n=1 Tax=Mizuhopecten yessoensis TaxID=6573 RepID=A0A210Q9P1_MIZYE
1	7746744	235465_2
1	7815111	296267_7
1	7829534	7836470	7e-165		Dymeclin n=1 Tax=Crassostrea gigas TaxID=29159 RepID=K1PRE0_CRAGI
1	7988660	8027521	2e-39		dehydrogenase/reductase SDR family member 7-like n=1 Tax=Crassostrea virginica TaxID=6565 RepID=UPI000BAF65BA
1	8043451	8065337	0		acid phosphatase type 7-like n=2 Tax=Crassostrea virginica TaxID=6565 RepID=UPI000BAEF820
1	8124954	8215075	0		serine/threonine-protein phosphatase 2A 56 kDa regulatory subunit epsilon isoform-like isoform X2 n=1 Tax=Pomacea canaliculata TaxID=400727 RepID=UPI000D729D0F
1	8219277	8245413	0		ATP-binding cassette sub-family D member 4 n=4 Tax=Mizuhopecten yessoensis TaxID=6573 RepID=A0A210QYD9_MIZYE
1	8261976	8362732	3e-26		Ependymin related protein-1 n=1 Tax=Ruditapes philippinarum TaxID=129788 RepID=A0A3G2CKI1_RUDPH
1	8305341	192837_25
1	8362562	192876_18
1	8380525	8390105	3e-28		Ependymin related protein-1 n=1 Tax=Ruditapes philippinarum TaxID=129788 RepID=A0A3G2CKJ1_RUDPH
1	8441175	192928_7
1	8467505	8553737	0		MAP/microtubule affinity-regulating kinase 3-like isoform X1 n=23 Tax=Pectinidae TaxID=6566 RepID=UPI0014586EFF
1	8607040	8615616	0		Suppressor of cytokine signaling 5 n=4 Tax=Pectinidae TaxID=6566 RepID=A0A210QW34_MIZYE
1	8615720	8622475	2e-38		Translin-associated protein X n=2 Tax=Mizuhopecten yessoensis TaxID=6573 RepID=A0A210QW61_MIZYE
1	8672828	8695147	2e-30		DAN,Cystine-knot cytokine n=1 Tax=Cinara cedri TaxID=506608 RepID=A0A5E4MJ59_9HEMI
1	8788171	265250_0
1	8794754	8834221	2e-175		thyrostimulin beta-5 subunit-like n=1 Tax=Crassostrea virginica TaxID=6565 RepID=UPI000BB01494
1	9009178	9013253	9e-69		Diaminopimelate decarboxylase 2, chloroplastic n=2 Tax=Mizuhopecten yessoensis TaxID=6573 RepID=A0A210PZC5_MIZYE
1	9102228	28357_4
1	9157897	9162940	0		AP complex subunit sigma n=3 Tax=Anura TaxID=8342 RepID=Q28GN6_XENTR
1	9262603	9378973	3e-35		Reverse transcriptase domain-containing protein n=1 Tax=invertebrate metagenome TaxID=1711999 RepID=A0A2H9T309_9ZZZZ
1	9398737	28275_8
1	9403090	9403812	4e-60		Reverse transcriptase domain-containing protein n=1 Tax=invertebrate metagenome TaxID=1711999 RepID=A0A2H9T4I5_9ZZZZ
1	9429139	9434083	0		queuosine salvage protein-like n=1 Tax=Pecten maximus TaxID=6579 RepID=UPI00145878BE
1	9433583	28266_20
1	9434489	9452240	5e-56		Mediator complex subunit 14 n=1 Tax=Equus caballus TaxID=9796 RepID=F6ZW47_HORSE
1	9453035	9464889	1e-81		queuosine salvage protein-like n=1 Tax=Pecten maximus TaxID=6579 RepID=UPI00145878BE
1	9470259	28249_7
1	9570005	9603708	5e-74		Vam6/Vps39-like protein n=3 Tax=Pectinidae TaxID=6566 RepID=A0A210QC15_MIZYE
1	9660403	9719835	3e-170		Synaptosomal-associated protein n=1 Tax=Elysia chlorotica TaxID=188477 RepID=A0A433T9L3_ELYCH
1	9672216	28147_1
1	9769227	28092_4
1	10031201	10048403	2e-159		sterile alpha motif domain-containing protein 15-like n=1 Tax=Crassostrea gigas TaxID=29159 RepID=UPI00148A3B79
1	10041629	27934_25
1	10088036	10089749	5e-11		codanin-1-like isoform X2 n=1 Tax=Pecten maximus TaxID=6579 RepID=UPI001457FC26
1	10093501	10108086	0		Signal recognition particle 54 kDa protein n=2 Tax=Crassostrea TaxID=6564 RepID=K1S2S8_CRAGI
1	10145318	10165852	0		acid phosphatase type 7 n=1 Tax=Crassostrea gigas TaxID=29159 RepID=UPI00148A6C32
1	10168718	10181975	2e-166		Actophorin n=2 Tax=Crassostrea TaxID=6564 RepID=K1R749_CRAGI
1	10220088	27835_9
1	10268102	27819_17
1	10281763	10326893	3e-19		opioid-binding protein/cell adhesion molecule homolog n=1 Tax=Aplysia californica TaxID=6500 RepID=UPI00065B96AC
1	10352868	27769_5
1	10361712	27763_10
1	10396890	10433274	6e-06		Symplekin n=2 Tax=Pectinidae TaxID=6566 RepID=A0A210PW07_MIZYE
1	10433481	10452748	0		putative tRNA pseudouridine synthase Pus10 isoform X1 n=2 Tax=Pecten maximus TaxID=6579 RepID=UPI001458F765
1	10444050	27724_10
1	10446424	27723_27
1	10454242	10475697	0		BTB/POZ domain-containing protein KCTD3-like isoform X1 n=1 Tax=Pecten maximus TaxID=6579 RepID=UPI001458F15D
1	10455015	27714_32
1	10460827	27710_6
1	10489768	27699_19
1	10504148	10509438	4e-13		RYamide receptor-like n=1 Tax=Pecten maximus TaxID=6579 RepID=UPI001457EA8C
1	10528551	27692_27
1	10532512	10573501	1e-125		sodium-dependent phosphate transport protein 2B-like n=1 Tax=Octopus vulgaris TaxID=6645 RepID=UPI001140C183
1	10576075	10600339	7e-63		Sodium-dependent phosphate transport protein 2B n=2 Tax=Crassostrea gigas TaxID=29159 RepID=K1R6C4_CRAGI
1	10603096	27654_30
1	10603683	10608753	0		G2/mitotic-specific cyclin-B-like isoform X1 n=2 Tax=Crassostrea virginica TaxID=6565 RepID=UPI000BAF559F
1	10610091	10616465	1e-140		G2/mitotic-specific cyclin-B n=4 Tax=Crassostrea gigas TaxID=29159 RepID=K1PD78_CRAGI
1	10621528	10636602	0		transmembrane protein 179B-like n=1 Tax=Pecten maximus TaxID=6579 RepID=UPI0014590DFE
1	10637256	10663068	6e-94		Serine/threonine-protein phosphatase 2A regulatory subunit B'' subunit gamma n=2 Tax=Pectinidae TaxID=6566 RepID=A0A210QFC2_MIZYE
1	10650128	27633_26
1	10668699	10702444	2e-58		ERO1-like protein beta n=6 Tax=Crassostrea TaxID=6564 RepID=K1QN22_CRAGI
1	10750877	10787211	0		CLK4-associating serine/arginine rich protein-like n=1 Tax=Crassostrea virginica TaxID=6565 RepID=UPI000BAF16E6
1	10810456	27571_27
1	10854383	27544_34
1	10871668	27538_19
1	11080212	27432_17
1	11091618	27424_24	0.0862417	0.00313695
1	11098299	11131435	5e-95		polyribonucleotide nucleotidyltransferase 1, mitochondrial n=1 Tax=Nylanderia fulva TaxID=613905 RepID=UPI0010FBA21F
1	11131725	11229006	0		Kinetochore-associated protein 1 n=2 Tax=Pectinidae TaxID=6566 RepID=A0A210Q537_MIZYE
1	11190149	27374_19
1	11240310	11299557	1e-145		short-chain collagen C4-like n=1 Tax=Branchiostoma belcheri TaxID=7741 RepID=UPI000948157E
1	11316111	11327281	8e-86		arrestin domain-containing protein 3-like n=1 Tax=Crassostrea virginica TaxID=6565 RepID=UPI000BAF4030
1	11318387	27328_7
1	11343809	11370913	2e-24		Exportin-1 n=2 Tax=Pectinidae TaxID=6566 RepID=A0A210QAE5_MIZYE
1	11367085	27307_6
1	11376723	11386772	9e-15		Retinol dehydrogenase 13 n=1 Tax=Mizuhopecten yessoensis TaxID=6573 RepID=A0A210QNT6_MIZYE
1	11386856	11410199	0		Tyrosyl-DNA phosphodiesterase 1 n=2 Tax=Mizuhopecten yessoensis TaxID=6573 RepID=A0A210PW15_MIZYE
1	11391029	27295_16
1	11403492	27289_2
1	11405978	27283_7
1	11422276	11436318	5e-102		S1 RNA-binding domain-containing protein 1-like n=1 Tax=Pecten maximus TaxID=6579 RepID=UPI00145838A1
1	11481661	27251_9
1	11481759	11490319	2e-18		Peptidase inhibitor 16 n=3 Tax=Crassostrea gigas TaxID=29159 RepID=K1QLA2_CRAGI
1	11487175	27245_35
1	11591822	11611254	1e-48		ubiquinone biosynthesis monooxygenase COQ6, mitochondrial-like n=1 Tax=Pecten maximus TaxID=6579 RepID=UPI00145892AA
1	11611449	11656824	6e-60		protein FAM161B-like n=1 Tax=Pecten maximus TaxID=6579 RepID=UPI001458FBCB
1	11671510	27157_27
1	11691735	11733878	0		cell division control protein 42 homolog n=1 Tax=Pomacea canaliculata TaxID=400727 RepID=UPI000D733F31
1	11793838	11794875	1e-30		lysosomal-trafficking regulator isoform X7 n=1 Tax=Crassostrea gigas TaxID=29159 RepID=UPI0005C39B83
1	11802084	11832057	6e-84		Lysosomal-trafficking regulator n=2 Tax=Mizuhopecten yessoensis TaxID=6573 RepID=A0A210PMB4_MIZYE
1	11826336	27059_31
1	11827950	1_11827950	0.1275	0.003192
1	11835220	11861286	4e-133		U4/U6.U5 tri-snRNP-associated protein 1 n=3 Tax=Mizuhopecten yessoensis TaxID=6573 RepID=A0A210QHC5_MIZYE
1	11873056	11918885	1e-178		Glutamyl-tRNA synthetase n=5 Tax=Crassostrea gigas TaxID=29159 RepID=K1QNW9_CRAGI
1	12018642	12069372	3e-173		Calmodulin n=2 Tax=Pectinidae TaxID=6566 RepID=A0A068EXU7_9BIVA
1	12088462	12096919	1e-86		calmodulin n=2 Tax=Crassostrea TaxID=6564 RepID=UPI0005C38384
1	12101820	12109800	1e-169		Calmodulin n=3 Tax=Nicotiana TaxID=4085 RepID=A0A1S4BYL3_TOBAC
1	12113208	12122698	0		Calmodulin n=1 Tax=Hondaea fermentalgiana TaxID=2315210 RepID=A0A2R5GGL6_9STRA
1	12129428	12143019	0		Calmodulin n=10 Tax=Mesangiospermae TaxID=1437183 RepID=A0A2U1PWD3_ARTAN
1	12143105	12154814	6e-166		Calmodulin n=3 Tax=Magnoliopsida TaxID=3398 RepID=A0A371F8D5_MUCPR
1	12162178	12173938	0		Calmodulin n=1 Tax=Monosiga brevicollis TaxID=81824 RepID=A9V8J8_MONBE
1	12181649	12224639	1e-14		Aldose 1-epimerase n=1 Tax=Biomphalaria glabrata TaxID=6526 RepID=A0A2C9JK14_BIOGL
1	12258100	266850_19
1	12336367	12439748	0		E3 ubiquitin-protein ligase TRIM33 n=1 Tax=Mizuhopecten yessoensis TaxID=6573 RepID=A0A210Q629_MIZYE
1	12471114	266923_2
1	12595982	261189_1
1	12749346	12752662	0		N-acetyltransferase domain-containing protein (Fragment) n=1 Tax=Mytilus galloprovincialis TaxID=29158 RepID=A0A409V6V7_MYTGA
1	12909436	261010_4
1	13200373	221193_27
1	13222737	221180_10
1	13243622	13280484	2e-118		kinesin-like protein KIF6 isoform X1 n=4 Tax=Crassostrea TaxID=6564 RepID=UPI00148A491B
1	13259967	221177_35
1	13276861	221169_11
1	13284691	221163_2
1	13308598	13499551	0		1-phosphatidylinositol 4,5-bisphosphate phosphodiesterase beta-1 isoform X1 n=4 Tax=Nematostella vectensis TaxID=45351 RepID=UPI00138FE72E
1	13504844	13606656	1e-08		synaptotagmin-14-like isoform X2 n=4 Tax=Pectinidae TaxID=6566 RepID=UPI000B45A774
1	13606766	13631131	1e-43		optic atrophy 3 protein homolog n=1 Tax=Saccoglossus kowalevskii TaxID=10224 RepID=UPI0001CBABCC
1	13650499	220955_4
1	13699353	13722864	0		Gremlin-1 n=1 Tax=Mizuhopecten yessoensis TaxID=6573 RepID=A0A210Q0Y3_MIZYE
1	13833889	13839170	2e-45		E3 ubiquitin-protein ligase TRIM71 n=2 Tax=Pectinidae TaxID=6566 RepID=A0A210QJQ5_MIZYE
1	13870330	13873942	1e-11		probable D-tyrosyl-tRNA(Tyr) deacylase 2 n=1 Tax=Crassostrea virginica TaxID=6565 RepID=UPI000BB00FEC
1	13875003	13890513	2e-67		RNA polymerase II-associated factor 1 homolog n=2 Tax=Pectinidae TaxID=6566 RepID=A0A210QU97_MIZYE
1	13883171	160300_8
1	13941766	13953568	2e-151		cyclin-K-like n=1 Tax=Pecten maximus TaxID=6579 RepID=UPI001458292C
1	13949392	160259_20
1	13968246	13988247	0		RNA-binding protein 4 n=5 Tax=Crassostrea TaxID=6564 RepID=K1RD19_CRAGI
1	13991177	14000646	3e-32		28S ribosomal protein S10, mitochondrial n=6 Tax=Euarchontoglires TaxID=314146 RepID=A0A2K6GA47_PROCO
1	14022667	14041063	1e-86		S5 DRBM domain-containing protein n=1 Tax=Strigamia maritima TaxID=126957 RepID=T1IPT9_STRMM
1	14136695	14158823	7e-30		isoaspartyl peptidase/L-asparaginase-like n=1 Tax=Pecten maximus TaxID=6579 RepID=UPI001458F6B3
1	14178379	14193856	1e-88		WD repeat-containing protein 26 n=2 Tax=Crassostrea TaxID=6564 RepID=K1PAZ3_CRAGI
1	14226694	14261044	2e-12		Atlastin-2 n=3 Tax=Pectinidae TaxID=6566 RepID=A0A210PFC7_MIZYE
1	14263076	14276848	2e-145		GTP 3',8-cyclase, mitochondrial-like isoform X3 n=1 Tax=Mizuhopecten yessoensis TaxID=6573 RepID=UPI000B45D3C8
1	14276938	14321847	1e-110		Death domain-containing protein n=3 Tax=Crassostrea TaxID=6564 RepID=K1QWW5_CRAGI
1	14325739	14335536	4e-66		E3 ubiquitin-protein ligase UBR7 n=1 Tax=Mizuhopecten yessoensis TaxID=6573 RepID=A0A210R2X6_MIZYE
1	14354525	14404584	7e-17		Ultraviolet-B receptor UVR8 n=2 Tax=Pectinidae TaxID=6566 RepID=A0A210PZT6_MIZYE
1	14408373	14435342	0		Leukemia inhibitory factor receptor n=1 Tax=Mizuhopecten yessoensis TaxID=6573 RepID=A0A210PNU4_MIZYE
1	14772146	14791292	2e-55		CUE domain-containing protein n=2 Tax=Crassostrea gigas TaxID=29159 RepID=K1PA20_CRAGI
1	14829444	14876463	3e-76		ATP-dependent RNA helicase TDRD9-like n=1 Tax=Pecten maximus TaxID=6579 RepID=UPI0014584045
1	15018326	15018807	4e-07		Exodeoxyribonuclease III n=1 Tax=Bathymodiolus brooksi thiotrophic gill symbiont TaxID=1052209 RepID=A0A482YV96_9BACT
1	15038741	15048905	0		Calmodulin n=1 Tax=Mizuhopecten yessoensis TaxID=6573 RepID=A0A210PL38_MIZYE
1	15127937	171109_35
1	15128388	15131637	0		dopamine N-acetyltransferase n=1 Tax=Frankliniella occidentalis TaxID=133901 RepID=UPI000E579073
1	15133162	15242443	0		N-acetyltransferase domain-containing protein (Fragment) n=1 Tax=Mytilus galloprovincialis TaxID=29158 RepID=A0A409V6V7_MYTGA
1	15148166	171112_2
1	15168818	171114_25
1	15178618	171117_11
1	15178896	171118_33
1	15245282	15253568	0		C-type lectin 2 n=1 Tax=Ruditapes philippinarum TaxID=129788 RepID=A0A451ET87_RUDPH
1	15438512	15447002	0		TALPID3 protein-like isoform X1 n=4 Tax=Crassostrea virginica TaxID=6565 RepID=UPI000BAF77C8
1	15449836	15470218	7e-158		microtubule-associated proteins 1A/1B light chain 3C-like n=2 Tax=Pectinidae TaxID=6566 RepID=UPI001459067C
1	15473836	15508738	0		spermatogenesis-associated protein 17-like isoform X1 n=2 Tax=Pecten maximus TaxID=6579 RepID=UPI00145913C9
1	15532674	15577380	4e-59		protein dispatched homolog 1-like n=1 Tax=Crassostrea virginica TaxID=6565 RepID=UPI000BAF29D2
1	15568217	171320_17
1	15592340	171337_10
1	15626234	171358_11
1	15661328	171367_35
1	15706346	15708993	7e-08		E3 ubiquitin-protein ligase TRIM33 n=2 Tax=Crassostrea gigas TaxID=29159 RepID=K1QNG4_CRAGI
1	15722815	15783533	2e-26		UTP--glucose-1-phosphate uridylyltransferase-like isoform X1 n=3 Tax=Pecten maximus TaxID=6579 RepID=UPI001458F5E6
1	15755926	171395_9
1	15756933	171397_15
1	15785415	15845880	9e-11		Phosphofurin acidic cluster sorting protein 2 n=7 Tax=Pectinidae TaxID=6566 RepID=A0A210QCI5_MIZYE
1	15806269	171416_24
1	15850528	15860936	4e-75		Peroxiredoxin-5 n=1 Tax=Mizuhopecten yessoensis TaxID=6573 RepID=A0A210QNW2_MIZYE
1	15948641	15979216	2e-21		N-acetyltransferase domain-containing protein (Fragment) n=1 Tax=Mytilus galloprovincialis TaxID=29158 RepID=A0A409V6V7_MYTGA
1	15950942	171506_1
1	15995395	16001762	3e-12		N-acetyltransferase domain-containing protein (Fragment) n=1 Tax=Mytilus galloprovincialis TaxID=29158 RepID=A0A409V6V7_MYTGA
1	16034691	16073441	0		Tripartite motif-containing protein 56 n=2 Tax=Crassostrea TaxID=6564 RepID=K1QPP1_CRAGI
1	16083627	16118719	4e-98		Polypeptide N-acetylgalactosaminyltransferase n=2 Tax=Biomphalaria glabrata TaxID=6526 RepID=S5S833_BIOGL
1	16095876	171545_32
1	16176021	16201331	0		Galactosylgalactosylxylosylprotein 3-beta-glucuronosyltransferase n=1 Tax=Biomphalaria glabrata TaxID=6526 RepID=A0A2C9JPE6_BIOGL
1	16262410	271942_0
1	16353941	16356365	0		G_PROTEIN_RECEP_F1_2 domain-containing protein n=3 Tax=Pomacea canaliculata TaxID=400727 RepID=A0A2T7PWL6_POMCA
1	16364880	16368633	2e-113		G_PROTEIN_RECEP_F1_2 domain-containing protein n=3 Tax=Pomacea canaliculata TaxID=400727 RepID=A0A2T7PWL6_POMCA
1	16414320	271869_18
1	16417700	16423844	1e-140		Cyclic GMP-AMP synthase n=1 Tax=Mizuhopecten yessoensis TaxID=6573 RepID=A0A210PNC3_MIZYE
1	16448890	271858_0
1	16567142	16658133	0		Regulator of G-protein signaling 22 n=18 Tax=Pectinidae TaxID=6566 RepID=A0A210QCF5_MIZYE
1	16693372	16727090	0		ADP-ribosylation factor 1-like n=1 Tax=Crassostrea gigas TaxID=29159 RepID=UPI00148A7CFC
1	16751433	142441_16
1	16751802	142442_16
1	16762704	16816473	8e-82		protein numb-like isoform X1 n=15 Tax=Crassostrea TaxID=6564 RepID=UPI00148A2DF0
1	16799149	142462_31
1	16826690	16852290	2e-111		N-acetylated-alpha-linked acidic dipeptidase 2-like n=2 Tax=Crassostrea virginica TaxID=6565 RepID=UPI000BB0A57B
1	16869489	16888092	1e-170		Beta-lactamase domain-containing protein n=1 Tax=Lottia gigantea TaxID=225164 RepID=V4AX94_LOTGI
1	16901460	16953767	3e-66		LOW QUALITY PROTEIN: zinc finger FYVE domain-containing protein 26-like n=1 Tax=Pecten maximus TaxID=6579 RepID=UPI00145879DB
1	16967087	16968835	5e-119		LOW QUALITY PROTEIN: zinc finger FYVE domain-containing protein 26-like n=1 Tax=Pecten maximus TaxID=6579 RepID=UPI00145879DB
1	16984936	17003765	4e-92		serine/threonine-protein kinase Nek2-like isoform X1 n=2 Tax=Pecten maximus TaxID=6579 RepID=UPI0014591A6C
1	17011086	17036222	0		protein arginine methyltransferase NDUFAF7, mitochondrial-like isoform X1 n=2 Tax=Pomacea canaliculata TaxID=400727 RepID=UPI000D7265B6
1	17061772	142560_1
1	17153182	17178179	6e-28		MOSC domain-containing protein n=1 Tax=Elysia chlorotica TaxID=188477 RepID=A0A3S1BRH3_ELYCH
1	17183614	17193918	5e-157		Zinc finger protein 410-like n=1 Tax=Labeo rohita TaxID=84645 RepID=A0A498NSR4_LABRO
1	17220738	17226990	0		Insoluble matrix shell protein 1 (Fragment) n=1 Tax=Ruditapes philippinarum TaxID=129788 RepID=IMSP1_RUDPH
1	17337080	142648_18
1	17553508	17614436	1e-06		HEAT repeat-containing protein 5B n=9 Tax=Pectinidae TaxID=6566 RepID=A0A210PI49_MIZYE
1	17604206	142713_25
1	17759489	17766579	5e-170		leucine-rich repeat-containing protein 15-like n=1 Tax=Pecten maximus TaxID=6579 RepID=UPI0014580572
1	17761949	142811_32
1	17772896	17784297	2e-105		leucine-rich repeat-containing G-protein coupled receptor 4-like n=1 Tax=Crassostrea virginica TaxID=6565 RepID=UPI000BAFEBEA
1	17897627	17910814	1e-102		Calmodulin n=1 Tax=Nilaparvata lugens TaxID=108931 RepID=A0A1I9WLC8_NILLU
1	18042865	250044_30
1	18059248	18107779	3e-154		Rho GTPase n=3 Tax=Pectinidae TaxID=6566 RepID=A0A0N9HK02_MIZYE
1	18190283	18213416	0		BTB/POZ domain-containing protein 3 n=2 Tax=Crassostrea gigas TaxID=29159 RepID=K1R7N4_CRAGI
1	18218995	250142_6
1	18280467	18301301	0		NADH dehydrogenase (ubiquinone) complex I, assembly factor 6-like n=1 Tax=Aplysia californica TaxID=6500 RepID=UPI00035A1DEB
1	18343645	18345540	2e-178		Ribonuclease P protein subunit p20 n=1 Tax=Pomacea canaliculata TaxID=400727 RepID=A0A2T7NX54_POMCA
1	18352032	18395697	7e-59		CCAAT/enhancer-binding protein zeta-like n=2 Tax=Crassostrea virginica TaxID=6565 RepID=UPI000BAF2C8D
1	18396495	18408035	1e-10		dr1-associated corepressor-like n=2 Tax=Lingula unguis TaxID=7574 RepID=A0A1S3HTY9_LINUN
1	18447017	18460207	2e-28		DDB1- and CUL4-associated factor 5 n=1 Tax=Crassostrea gigas TaxID=29159 RepID=UPI00148A7560
1	18528020	309297_3
1	18528737	18539988	0		Arginase n=2 Tax=Hyriopsis cumingii TaxID=165450 RepID=D2KN89_HYRCU
1	18547403	18551065	0		Sulfotransferase-like protein (Fragment) n=1 Tax=Meretrix meretrix TaxID=291251 RepID=E0AF00_MERMT
1	18565150	18575227	1e-142		Toll-like receptor 4 n=1 Tax=Cyclina sinensis TaxID=120566 RepID=A0A1P7Z7T9_CYCSN
1	18590519	192023_33
1	18614537	18639063	5e-31		39S ribosomal protein L4, mitochondrial-like n=1 Tax=Mizuhopecten yessoensis TaxID=6573 RepID=UPI000B45EAE6
1	18641075	18645012	1e-35		inositol phosphoceramide mannosyltransferase 2-like n=1 Tax=Aplysia californica TaxID=6500 RepID=UPI00035A29A4
1	18814948	18831282	4e-114		nuclear nucleic acid-binding protein C1D-like n=2 Tax=Crassostrea gigas TaxID=29159 RepID=UPI00097514CB
1	18856777	18928380	4e-124		Non-specific serine/threonine protein kinase n=12 Tax=Pectinidae TaxID=6566 RepID=A0A210PKW9_MIZYE
1	18864338	191880_20
1	18896550	191866_34
1	18935991	18952738	0		LOW QUALITY PROTEIN: cilia- and flagella-associated protein 36-like n=1 Tax=Crassostrea virginica TaxID=6565 RepID=UPI000BB0BBF8
1	18937895	191849_29
1	18952741	18976288	0		2-arachidonoylglycerol hydrolase ABHD12 n=1 Tax=Mizuhopecten yessoensis TaxID=6573 RepID=A0A210QYK8_MIZYE
1	18978316	19012363	1e-65		cyclic nucleotide-binding domain-containing protein 2-like n=1 Tax=Pecten maximus TaxID=6579 RepID=UPI001458D427
1	18985767	1_18985767	0.078	0.030748
1	19029955	191810_34
1	19047923	19074459	2e-135		Steryl-sulfatase n=1 Tax=Mizuhopecten yessoensis TaxID=6573 RepID=A0A210Q0B6_MIZYE
1	19082419	19098752	5e-150		hillarin n=1 Tax=Crassostrea gigas TaxID=29159 RepID=UPI00148A2C7B
1	19116238	19121158	6e-52		GMC_OxRdtase_N domain-containing protein n=1 Tax=Biomphalaria glabrata TaxID=6526 RepID=A0A2C9K9I8_BIOGL
1	19180601	19181384	1e-61		putative nuclease HARBI1 isoform X2 n=1 Tax=Cyprinus carpio TaxID=7962 RepID=UPI0008FA93D4
1	19261245	19264296	1e-47		Death-inducer obliterator 1 n=1 Tax=Channa argus TaxID=215402 RepID=A0A6G1Q412_9TELE
1	19382445	191721_34
1	19386893	19429914	9e-58		Multiple coagulation factor deficiency protein 2-like n=3 Tax=Mizuhopecten yessoensis TaxID=6573 RepID=A0A210R5S2_MIZYE
1	19468600	232597_28
1	19485102	19542885	8e-78		Serine/threonine protein phosphatase 2A regulatory subunit n=40 Tax=Crassostrea TaxID=6564 RepID=K1R4M7_CRAGI
1	19554710	19568896	8e-99		putative deoxyribonuclease TATDN3 n=1 Tax=Pecten maximus TaxID=6579 RepID=UPI001457FE04
1	19569028	19621064	4e-50		Proteasome activator complex subunit 4 n=3 Tax=Pectinidae TaxID=6566 RepID=A0A210QNW9_MIZYE
1	19684045	19750142	9e-71		Mitochondrial 2-oxodicarboxylate carrier n=2 Tax=Pectinidae TaxID=6566 RepID=A0A210PGZ0_MIZYE
1	19707586	232729_6
1	19736184	232736_1
1	19764459	232747_9
1	19795980	19798443	9e-89		Acid trehalase-like protein 1 n=1 Tax=Mizuhopecten yessoensis TaxID=6573 RepID=A0A210PKW2_MIZYE
1	19805039	19811033	4e-09		Glyco_hydro_65m domain-containing protein n=1 Tax=Biomphalaria glabrata TaxID=6526 RepID=A0A2C9KZV5_BIOGL
1	19813729	19816058	8e-58		piggyBac transposable element-derived protein 4-like n=1 Tax=Lingula unguis TaxID=7574 RepID=A0A1S3J244_LINUN
1	19826618	232760_2
1	19891043	19905140	0		peroxiredoxin-5, mitochondrial-like n=1 Tax=Pomacea canaliculata TaxID=400727 RepID=UPI000D7267F8
1	19929988	232809_34
1	20053067	232871_1
1	20070718	232877_28
1	20088261	232888_1
1	20224953	20228625	4e-16		Actin, nonmuscle n=1 Tax=Mizuhopecten yessoensis TaxID=6573 RepID=A0A210QJ56_MIZYE
1	20232014	20235634	2e-152		Actin, nonmuscle n=1 Tax=Mizuhopecten yessoensis TaxID=6573 RepID=A0A210QJ56_MIZYE
1	20298508	20307644	0		E3 ubiquitin-protein ligase TRIM33 n=1 Tax=Mizuhopecten yessoensis TaxID=6573 RepID=A0A210Q629_MIZYE
1	20357625	20359975	9e-66		girdin-like n=1 Tax=Pecten maximus TaxID=6579 RepID=UPI0014585D14
1	20456880	20467538	2e-135		selenoprotein N-like n=1 Tax=Branchiostoma belcheri TaxID=7741 RepID=UPI0009481D4D
1	20465546	210436_1
1	20521741	20638876	4e-68		Endothelial PAS domain-containing protein 1 n=2 Tax=Mizuhopecten yessoensis TaxID=6573 RepID=A0A210QUB1_MIZYE
1	20640466	20650065	4e-137		Monocarboxylate transporter 9 n=3 Tax=Mizuhopecten yessoensis TaxID=6573 RepID=A0A210R681_MIZYE
1	20706538	20713144	2e-116		Calmodulin n=1 Tax=Rosa chinensis TaxID=74649 RepID=A0A2P6SJV0_ROSCH
1	20714413	20738418	7e-121		DNA_mis_repair domain-containing protein (Fragment) n=1 Tax=Branchiostoma floridae TaxID=7739 RepID=C3XR93_BRAFL
1	20738736	20749622	4e-28		zinc finger C2HC domain-containing protein 1C-like n=1 Tax=Crassostrea virginica TaxID=6565 RepID=UPI000BAFE4A9
1	20964006	21005575	2e-101		AB hydrolase superfamily protein C1039.03 isoform X3 n=11 Tax=Crassostrea TaxID=6564 RepID=UPI0005C38F69
1	21015587	21018566	1e-180		regucalcin-like n=1 Tax=Pecten maximus TaxID=6579 RepID=UPI0014590C32
1	21028850	21088587	6e-151		AB hydrolase superfamily protein C1039.03-like isoform X1 n=2 Tax=Pecten maximus TaxID=6579 RepID=UPI001458A0B3
1	21085960	278085_29
1	21147821	21163503	3e-104		carboxypeptidase O n=1 Tax=Crassostrea gigas TaxID=29159 RepID=UPI0005C3A293
1	21150662	275724_31
1	21189044	21194258	0		Transcriptional-regulating factor 1 n=6 Tax=Pectinidae TaxID=6566 RepID=A0A210PFE1_MIZYE
1	21190712	275707_33
1	21202744	21206925	0		Transcriptional-regulating factor 1 n=6 Tax=Pectinidae TaxID=6566 RepID=A0A210PFE1_MIZYE
1	21273710	21391809	0		Baculoviral IAP repeat-containing protein 6 n=7 Tax=Pectinidae TaxID=6566 RepID=A0A210QAD8_MIZYE
1	21349893	272490_25
1	21354423	272493_10
1	21371653	272505_11
1	21401355	21414674	0		tubulin-folding cofactor B-like n=1 Tax=Pecten maximus TaxID=6579 RepID=UPI0014580A6F
1	21418289	272528_4
1	21421187	21443538	2e-142		dehydrogenase/reductase SDR family member 1-like n=1 Tax=Crassostrea virginica TaxID=6565 RepID=UPI000BAFED4B
1	21421896	272531_8
1	21445616	21457042	2e-15		AN1-type zinc finger protein 3 n=2 Tax=Pectinidae TaxID=6566 RepID=A0A210R6Z3_MIZYE
1	21496048	21562042	1e-56		cryptochrome DASH-like n=1 Tax=Pecten maximus TaxID=6579 RepID=UPI0014587955
1	21564677	21574826	0		probable protein S-acyltransferase 6 isoform X1 n=4 Tax=Pecten maximus TaxID=6579 RepID=UPI00145850ED
1	21616877	21644987	2e-37		Calmodulin n=1 Tax=Serendipita indica (strain DSM 11827) TaxID=1109443 RepID=G4TIQ3_SERID
1	21733448	152615_5
1	21765580	152630_16	0.106247	0.00277812
1	21789796	152632_26
1	21818979	152637_17
1	21827113	152644_19
1	21896044	152664_19
1	21926292	152683_29
1	21927456	152684_27
1	21975585	152705_15
1	21979539	152707_31
1	21995557	22028293	1e-16		dnaJ homolog subfamily C member 17-like n=1 Tax=Pecten maximus TaxID=6579 RepID=UPI0014590219
1	22036414	152723_35
1	22048015	152726_31
1	22048650	152730_8
1	22059072	152735_8
1	22105695	152742_17
1	22136500	152750_1
1	22170751	152766_7
1	22173559	152768_5
1	22230235	22257718	4e-56		Bardet-Biedl syndrome 1 protein n=7 Tax=Crassostrea TaxID=6564 RepID=K1RU52_CRAGI
1	22263908	294968_18
1	22394393	257467_25
1	22472538	257430_19
1	22472642	257429_6
1	22521170	257402_11
1	22537572	257399_30
1	22625977	257368_28
1	22633670	257365_11
1	22656560	22684540	9e-157		BTB/POZ domain-containing protein 6 n=2 Tax=Mizuhopecten yessoensis TaxID=6573 RepID=A0A210QE33_MIZYE
1	22725132	22881924	0		serine/threonine-protein phosphatase 4 regulatory subunit 4-like isoform X1 n=14 Tax=Pectinidae TaxID=6566 RepID=UPI0014585193
1	22802219	254817_29
1	22810178	254813_30
1	22910757	22971597	5e-12		ribosome-binding protein 1-like isoform X1 n=16 Tax=Crassostrea virginica TaxID=6565 RepID=UPI000BAFBB7E
1	22948074	254781_6
1	22961340	254775_32
1	22971616	22978132	0		DNA-directed RNA polymerase subunit n=1 Tax=Mizuhopecten yessoensis TaxID=6573 RepID=A0A210PPK7_MIZYE
1	22978133	22993461	9e-73		Sacchrp_dh_NADP domain-containing protein n=1 Tax=Lottia gigantea TaxID=225164 RepID=V4B7C8_LOTGI
1	22999820	23033811	4e-76		HHIP-like protein 2 isoform X1 n=2 Tax=Crassostrea virginica TaxID=6565 RepID=UPI000BAFBAB2
1	23022025	254744_25
1	23030906	254740_32
1	23048639	23115131	2e-31		Tubulin polyglutamylase ttll-4 n=2 Tax=Pectinidae TaxID=6566 RepID=A0A210PYX8_MIZYE
1	23173297	147231_26
1	23258977	23269745	3e-06		Neuroendocrine convertase 2 n=3 Tax=Crassostrea TaxID=6564 RepID=K1Q5P9_CRAGI
1	23370410	23378471	5e-20		Gamma-glutamylcyclotransferase n=1 Tax=Mizuhopecten yessoensis TaxID=6573 RepID=A0A210PPI8_MIZYE
1	23379358	147139_6
1	23382476	23398847	0		N-alpha-acetyltransferase 80-like n=1 Tax=Pecten maximus TaxID=6579 RepID=UPI0014589EC2
1	23399888	23424675	0		damage-control phosphatase ARMT1-like n=1 Tax=Pecten maximus TaxID=6579 RepID=UPI001457F528
1	23443410	23443713	5e-10		Pol-like protein n=1 Tax=Biomphalaria glabrata TaxID=6526 RepID=A3FMR3_BIOGL
1	23448912	147113_32
1	23470905	147100_11
1	23471626	23493574	0		RBR-type E3 ubiquitin transferase n=3 Tax=Crassostrea gigas TaxID=29159 RepID=K1Q5J3_CRAGI
1	23519281	23559102	0		Homeobox protein Nkx-2.2a n=2 Tax=Pectinidae TaxID=6566 RepID=A0A210PHP1_MIZYE
1	23524282	147084_33
1	23594954	147048_11
1	23654926	147020_11
1	23675979	23742687	0		5'-3' exoribonuclease n=2 Tax=Crassostrea gigas TaxID=29159 RepID=K1QTP4_CRAGI
1	23714279	146991_26
1	23731591	146984_9
1	23747683	146980_32
1	23830212	23844324	9e-51		Homeodomain protein NK2.1 n=1 Tax=Leptochiton asellus TaxID=211853 RepID=A0A0Y0HYM7_9MOLL
1	23853017	146939_25
1	23891504	146919_5
1	23905893	23956824	0		sacsin-like isoform X1 n=1 Tax=Orbicella faveolata TaxID=48498 RepID=UPI0009E5F524
1	23906973	146912_27
1	23921829	146908_30
1	23961891	146904_31
1	23964590	146902_6
1	24035934	24089169	3e-34		WD repeat-containing protein 92 n=3 Tax=Pectinidae TaxID=6566 RepID=A0A210PMA1_MIZYE
1	24117822	146863_27
1	24132987	24142045	5e-112		Protein FAM89B n=2 Tax=Pectinidae TaxID=6566 RepID=A0A210PPK2_MIZYE
1	24143901	24167555	1e-35		ribonuclease H2 subunit C-like n=1 Tax=Pecten maximus TaxID=6579 RepID=UPI001458045B
1	24176880	24186462	6e-176		Riboflavin transporter 2 n=1 Tax=Mizuhopecten yessoensis TaxID=6573 RepID=A0A210PNF4_MIZYE
1	24219906	146836_3
1	24258632	24322482	9e-157		LOW QUALITY PROTEIN: uncharacterized protein LOC117323234 n=1 Tax=Pecten maximus TaxID=6579 RepID=UPI0014580643
1	24346152	146798_3
1	24353682	146793_6
1	24367886	146787_2
1	24368893	146786_35
1	24399192	146768_16
1	24437565	24455857	0		Protein-L-isoaspartate O-methyltransferase n=1 Tax=Biomphalaria glabrata TaxID=6526 RepID=A0A2C9K536_BIOGL
1	24485473	24603507	1e-61		cap-specific mRNA (nucleoside-2'-O-)-methyltransferase 1-like n=1 Tax=Pecten maximus TaxID=6579 RepID=UPI001458A933
1	24542031	115234_33
1	24543483	115236_4
1	24544504	115237_4
1	24579690	115246_35
1	24612594	24626574	2e-43		PH domain-containing protein n=1 Tax=Capitella teleta TaxID=283909 RepID=R7UAM5_CAPTE
1	24645396	24654810	1e-77		Membrane progestin receptor gamma-B n=1 Tax=Mizuhopecten yessoensis TaxID=6573 RepID=A0A210Q7Z7_MIZYE
1	24658307	115257_11
1	24658365	24700553	0		ANK_REP_REGION domain-containing protein n=1 Tax=Lottia gigantea TaxID=225164 RepID=V4CHK7_LOTGI
1	24702002	24723493	5e-42		RNA helicase n=1 Tax=Mizuhopecten yessoensis TaxID=6573 RepID=A0A210PMN9_MIZYE
1	24739521	115280_24
1	24739774	115281_24
1	24798233	115292_2
1	24820738	115298_16
1	24845652	115305_33
1	24878852	115315_34
1	24927222	24932851	0		SpoU_methylase domain-containing protein n=2 Tax=Pomacea canaliculata TaxID=400727 RepID=A0A2T7NYM8_POMCA
1	24932885	115327_10
1	24938993	115331_28
1	24945922	24954043	4e-168		SpoU_methylase domain-containing protein n=1 Tax=Biomphalaria glabrata TaxID=6526 RepID=A0A2C9JQH1_BIOGL
1	24951424	1_24951424	0.1274	0.00612
1	24968420	24979852	7e-115		Cell division control protein 42-like protein n=1 Tax=Crassostrea gigas TaxID=29159 RepID=K1QTB7_CRAGI
1	24989610	25009147	0		Zinc transporter ZIP9-B n=4 Tax=Pectinidae TaxID=6566 RepID=A0A210QE30_MIZYE
1	25013708	25028638	2e-174		Inhibitor of nuclear factor-kappaB n=1 Tax=Meretrix meretrix TaxID=291251 RepID=E2IH96_MERMT
1	25037643	25038711	5e-169		Reverse transcriptase domain-containing protein n=1 Tax=invertebrate metagenome TaxID=1711999 RepID=A0A2H9T4I8_9ZZZZ
1	25118233	115388_35
1	25173468	25186721	1e-138		SERTA domain-containing protein 4 n=2 Tax=Pectinidae TaxID=6566 RepID=A0A210QJ88_MIZYE
1	25302320	115462_0
1	25380631	115504_19
1	25496572	25599526	0		Kazal-like domain-containing protein n=1 Tax=Arion vulgaris TaxID=1028688 RepID=A0A0B7AQU4_9EUPU
1	25594873	1_25594873	0.1214	0.005922
1	25634726	25672355	9e-169		carnitine O-palmitoyltransferase 1, liver isoform-like n=1 Tax=Crassostrea virginica TaxID=6565 RepID=UPI000BB05809
1	25673856	25690606	3e-33		Histone acetyltransferase n=5 Tax=Crassostrea TaxID=6564 RepID=K1RUZ0_CRAGI
1	25690758	25744726	0		ARID domain-containing protein n=1 Tax=Octopus bimaculoides TaxID=37653 RepID=A0A0L8GVL4_OCTBM
1	25796237	25799407	7e-108		THUMP domain-containing protein 2 isoform X1 n=2 Tax=Monopterus albus TaxID=43700 RepID=UPI0009B3D6AC
1	25863736	115739_1
1	25882700	115742_18
1	25892761	25930258	1e-173		Helicase-like transcription factor n=3 Tax=Crassostrea gigas TaxID=29159 RepID=K1RDA8_CRAGI
1	25940678	25977177	8e-110		helicase-like transcription factor isoform X1 n=3 Tax=Amblyraja radiata TaxID=386614 RepID=UPI001403294C
1	25992488	26011932	0		E3 ubiquitin-protein ligase RNF8-like n=1 Tax=Pecten maximus TaxID=6579 RepID=UPI001458B9D5
1	26013531	26024571	0		40S ribosomal protein S30 n=1 Tax=Pinctada fucata TaxID=50426 RepID=A0A194AN95_PINFU
1	26025445	26034235	0		Membrane progestin receptor alpha-B n=2 Tax=Mizuhopecten yessoensis TaxID=6573 RepID=A0A210Q5L1_MIZYE
1	26046885	26064755	1e-123		DUF4477 domain-containing protein n=1 Tax=Mizuhopecten yessoensis TaxID=6573 RepID=A0A210PQ98_MIZYE
1	26065076	26137410	4e-107		Inositol-tetrakisphosphate 1-kinase n=1 Tax=Lottia gigantea TaxID=225164 RepID=V3Z9P8_LOTGI
1	26081489	115801_10
1	26120490	115810_2
1	26243258	26292465	0		low-density lipoprotein receptor-related protein 4-like isoform X1 n=3 Tax=Centruroides sculpturatus TaxID=218467 RepID=UPI000C6DA00E
1	26293873	26310617	0		Calmodulin n=1 Tax=Nilaparvata lugens TaxID=108931 RepID=A0A1I9WLC8_NILLU
1	26299799	115889_5
1	26301234	115890_2
1	26301630	115891_5
1	26311742	115894_7
1	26314237	26350509	2e-102		Alpha-amylase n=1 Tax=Corbicula fluminea TaxID=45949 RepID=Q8I9P8_9BIVA
1	26358969	115914_3
1	26363775	115917_17
1	26405912	26435919	0		SHSP domain-containing protein n=1 Tax=Pomacea canaliculata TaxID=400727 RepID=A0A2T7P6R8_POMCA
1	26442483	26450095	8e-51		galactosylceramide sulfotransferase-like isoform X2 n=3 Tax=Crassostrea gigas TaxID=29159 RepID=UPI00097512F0
1	26446036	115936_3
1	26540884	26553583	5e-98		TRAF3 n=1 Tax=Sinanodonta woodiana TaxID=1069815 RepID=A0A291RBW5_SINWO
1	26548431	256919_5
1	26572898	26592677	8e-71		protein farnesyltransferase subunit beta-like n=1 Tax=Pecten maximus TaxID=6579 RepID=UPI00145807DB
1	26594334	26603933	0		Protein max n=6 Tax=Crassostrea TaxID=6564 RepID=K1PW70_CRAGI
1	26602768	256937_1
1	26604799	256942_3
1	26608004	26632746	0		Splicing factor 3B subunit 2 n=2 Tax=Pectinidae TaxID=6566 RepID=A0A210PME1_MIZYE
1	26609326	256965_1
1	26634638	256972_17
1	26660079	26694143	0		monoacylglycerol lipase ABHD2 isoform X1 n=2 Tax=Lingula unguis TaxID=7574 RepID=A0A1S3IDL4_LINUN
1	26665237	256979_4	0.104927	0.00344777
1	26709670	256992_34
1	26729835	26741767	2e-89		Maleylacetoacetate isomerase n=1 Tax=Capitella teleta TaxID=283909 RepID=R7UCZ0_CAPTE
1	26730362	256998_18
1	26741842	26772369	8e-136		Dolichyl-phosphate-mannose--protein mannosyltransferase n=1 Tax=Lottia gigantea TaxID=225164 RepID=V3Z5T1_LOTGI
1	26815333	26843662	2e-136		DNA polymerase epsilon subunit 2 n=4 Tax=Crassostrea TaxID=6564 RepID=UPI00148A7AAB
1	26849099	26866172	0		acidic fibroblast growth factor intracellular-binding protein-like isoform X1 n=2 Tax=Crassostrea virginica TaxID=6565 RepID=UPI000BAE7CFE
1	26945892	26978899	0		Prospero n=1 Tax=Doryteuthis pealeii TaxID=1051067 RepID=A0A1B3Q5W2_DORPE
1	26968649	276227_18
1	27001128	276240_9
1	27005113	276243_30
1	27034938	276257_19
1	27046779	27051196	3e-108		Receptor protein-tyrosine kinase n=1 Tax=Mizuhopecten yessoensis TaxID=6573 RepID=A0A210QRD4_MIZYE
1	27092083	27098463	5e-15		retinol dehydrogenase 13-like n=1 Tax=Pecten maximus TaxID=6579 RepID=UPI001458291E
1	27108025	27228382	1e-71		putative nuclease HARBI1 n=4 Tax=Pecten maximus TaxID=6579 RepID=UPI001458761E
1	27124908	187843_25
1	27163411	187828_19
1	27237729	187814_15
1	27239180	27268402	9e-179		Transmembrane prolyl 4-hydroxylase n=1 Tax=Stylophora pistillata TaxID=50429 RepID=A0A2B4SS66_STYPI
1	27244229	187812_8
1	27253145	187806_20
1	27380802	27392610	3e-132		GOLD domain-containing protein n=1 Tax=Lottia gigantea TaxID=225164 RepID=V4AC86_LOTGI
1	27402778	27520667	0		extended synaptotagmin-1-like isoform X1 n=3 Tax=Pecten maximus TaxID=6579 RepID=UPI0014585863
1	27464097	187539_18
1	27499068	187558_25
1	27517410	187571_7
1	27534010	187585_8
1	27535853	27546599	3e-72		ADP-ribosylation factor 6 isoform X1 n=1 Tax=Crassostrea gigas TaxID=29159 RepID=UPI00148AB9BC
1	27548249	27580692	0		centrosomal protein kizuna-like isoform X1 n=4 Tax=Pecten maximus TaxID=6579 RepID=UPI0014583235
1	27580728	27594745	1e-27		TYR_PHOSPHATASE_2 domain-containing protein n=1 Tax=Lottia gigantea TaxID=225164 RepID=V4C3P3_LOTGI
1	27733775	187673_15
1	27760795	187685_9
1	27823124	27848352	9e-92		tubulin epsilon and delta complex protein 1-like n=1 Tax=Pecten maximus TaxID=6579 RepID=UPI001458E8F3
1	27849517	27861655	0		Malate dehydrogenase n=1 Tax=Symphyocladia latiuscula TaxID=396806 RepID=A0A097IUN4_9FLOR
1	27878983	27925984	1e-124		Son of sevenless-like 2 n=2 Tax=Pectinidae TaxID=6566 RepID=A0A210R5V1_MIZYE
1	27909132	187728_5
1	27930563	27954894	0		aldose 1-epimerase-like n=1 Tax=Crassostrea virginica TaxID=6565 RepID=UPI000BAF1FEE
1	27968927	27982089	0		D-beta-hydroxybutyrate dehydrogenase, mitochondrial-like n=2 Tax=Crassostrea virginica TaxID=6565 RepID=UPI000BAEB978
1	28035250	187764_0
1	28035298	187765_31
1	28036467	28084046	1e-63		T-cell-specific guanine nucleotide triphosphate-binding protein 1-like n=1 Tax=Dendronephthya gigantea TaxID=151771 RepID=UPI001069B09E
1	28095708	28103142	6e-159		WD repeat-containing protein 25 n=1 Tax=Crassostrea gigas TaxID=29159 RepID=K1Q018_CRAGI
1	28137389	28153354	4e-114		Calmodulin n=3 Tax=Pneumocystis TaxID=4753 RepID=CALM_PNECA
1	28162399	28182537	1e-28		Calmodulin n=4 Tax=Protostomia TaxID=33317 RepID=K1PYA6_CRAGI
1	28192048	28194554	3e-35		RNA pseudouridylate synthase domain-containing protein 4 n=2 Tax=Mizuhopecten yessoensis TaxID=6573 RepID=A0A210QD54_MIZYE
1	28223052	234952_33
1	28241723	28288832	0		BRCA1-A complex subunit BRE n=2 Tax=Pectinidae TaxID=6566 RepID=A0A210Q3P7_MIZYE
1	28274870	234925_24
1	28289238	28325352	4e-38		Striatin-3 n=12 Tax=Pectinidae TaxID=6566 RepID=A0A210PGY3_MIZYE
1	28327430	234907_2
1	28327437	234906_9
1	28342699	234896_34
1	28433186	28469958	4e-86		zf-Sec23_Sec24 domain-containing protein n=1 Tax=Pomacea canaliculata TaxID=400727 RepID=A0A2T7PFW0_POMCA
1	28440790	234879_30
1	28505495	28523365	0		Carboxypeptidase Q n=1 Tax=Lottia gigantea TaxID=225164 RepID=V4AAI9_LOTGI
1	28543321	28554732	0		Tr-type G domain-containing protein n=1 Tax=Pomacea canaliculata TaxID=400727 RepID=A0A2T7NXZ3_POMCA
1	28569037	28672808	0		zf-Sec23_Sec24 domain-containing protein n=1 Tax=Pomacea canaliculata TaxID=400727 RepID=A0A2T7PFW0_POMCA
1	28580488	234853_0
1	28586013	234850_27
1	28634873	234837_11
1	28671444	234829_29
1	28681634	234826_27
1	28715152	234812_4
1	28920712	28931774	6e-36		ATP-dependent DNA helicase Q-like 3 isoform X1 n=2 Tax=Crassostrea virginica TaxID=6565 RepID=UPI000BAFC2F6
1	28931635	212719_9
1	28944381	28954204	0		3 beta-hydroxysteroid dehydrogenase/Delta 5-->4-isomerase type 4-like n=1 Tax=Pecten maximus TaxID=6579 RepID=UPI00145883B9
1	28951403	212709_18
1	28953853	212706_9
1	28981058	28998393	1e-68		Complement C1Q-like protein n=1 Tax=Hyriopsis cumingii TaxID=165450 RepID=A0A1L2FYM6_HYRCU
1	29005976	29010660	0		Complement C1Q-like protein n=1 Tax=Hyriopsis cumingii TaxID=165450 RepID=A0A1L2FYM6_HYRCU
1	29078539	29092875	0		Calmodulin (Fragment) n=1 Tax=Frankliniella cephalica TaxID=407008 RepID=A0A481SX09_9NEOP
1	29081345	212654_1
1	29127706	29139647	0		MARVEL domain-containing protein n=2 Tax=Pectinidae TaxID=6566 RepID=A0A210QCZ7_MIZYE
1	29173207	29189518	0		WD repeat-containing protein 20 n=3 Tax=Pectinidae TaxID=6566 RepID=A0A210Q470_MIZYE
1	29191664	29251858	2e-124		protein phosphatase 1 regulatory subunit 21 isoform X1 n=4 Tax=Crassostrea TaxID=6564 RepID=UPI00148A5BD6
1	29197828	212577_33
1	29245907	212556_6
1	29269726	212540_27
1	29290056	29354140	0		Tripartite motif-containing protein 45 n=2 Tax=Crassostrea gigas TaxID=29159 RepID=K1RGM9_CRAGI
1	29352591	212491_9
1	29354863	212489_11
1	29435358	29436821	4e-51		RNA-directed DNA polymerase from mobile element jockey-like n=1 Tax=Priapulus caudatus TaxID=37621 RepID=UPI000719D5F0
1	29444773	29466513	0		Vasohibin-2 n=4 Tax=Pectinidae TaxID=6566 RepID=A0A210QXP3_MIZYE
1	29595378	212358_24
1	29680862	29696442	0		pinin-like n=1 Tax=Pecten maximus TaxID=6579 RepID=UPI0014584B37
1	29716597	29736532	1e-86		isoleucine--tRNA ligase, mitochondrial-like n=1 Tax=Pomacea canaliculata TaxID=400727 RepID=UPI000D73BD16
1	29748166	29756542	1e-45		DNA repair protein XRCC3 n=3 Tax=Pectinidae TaxID=6566 RepID=A0A210PP54_MIZYE
1	29752142	246271_5
1	29813843	29904911	6e-106		T-cell-specific guanine nucleotide triphosphate-binding protein 1-like n=1 Tax=Dendronephthya gigantea TaxID=151771 RepID=UPI001069B09E
1	29862103	246241_0
1	29913286	246231_5
1	29928764	29938095	5e-48		Cysteine-rich PDZ-binding protein n=1 Tax=Octopus bimaculoides TaxID=37653 RepID=A0A0L8GZK2_OCTBM
1	29939522	29972537	2e-125		RNA polymerase II-associated protein 1-like n=1 Tax=Pecten maximus TaxID=6579 RepID=UPI001458530D
1	29973587	29991058	0		T-complex-associated testis-expressed protein 1 n=2 Tax=Pectinidae TaxID=6566 RepID=A0A210R5Q9_MIZYE
1	29993233	30005052	0		Putative establishment of meiotic spindle orientation (Fragment) n=2 Tax=Nyssorhynchus TaxID=44543 RepID=T1EAD2_ANOAQ
1	30029106	246188_33
1	30035693	30039822	0		Complement C1Q-like protein n=1 Tax=Hyriopsis cumingii TaxID=165450 RepID=A0A1L2FYM6_HYRCU
1	30098945	30129139	2e-127		Poly [ADP-ribose] polymerase n=2 Tax=Crassostrea gigas TaxID=29159 RepID=K1QLU6_CRAGI
1	30132965	30142217	0		CARD domain-containing protein n=2 Tax=Crassostrea TaxID=6564 RepID=K1RK16_CRAGI
1	30139995	246127_8
1	30160315	246115_31
1	30273441	148564_10
1	30336752	148592_2
1	30350043	30355200	2e-135		Hemocyte defensin Cg-Defh1 (Fragment) n=7 Tax=Crassostrea gigas TaxID=29159 RepID=DEFH1_CRAGI
1	30399412	30410401	0		Orexin receptor type 2 n=1 Tax=Mizuhopecten yessoensis TaxID=6573 RepID=A0A210QCI2_MIZYE
1	30401803	148618_33
1	30425612	30440772	7e-108		mediator of RNA polymerase II transcription subunit 34-like n=1 Tax=Pecten maximus TaxID=6579 RepID=UPI0014586CC1
1	30514309	30540680	5e-26		Lysocardiolipin acyltransferase 1 n=3 Tax=Pectinidae TaxID=6566 RepID=A0A210QAB5_MIZYE
1	30515909	117520_35
1	30556722	30561645	2e-21		tetratricopeptide repeat protein 9C n=2 Tax=Lingula unguis TaxID=7574 RepID=A0A1S3JBH5_LINUN
1	30562938	30605483	5e-18		Ral GTPase-activating protein subunit alpha-2 n=11 Tax=Pectinidae TaxID=6566 RepID=A0A210QRS6_MIZYE
1	30581958	117541_2
1	30661439	30663566	2e-39		Rap-GAP domain-containing protein n=7 Tax=Biomphalaria glabrata TaxID=6526 RepID=A0A2C9JJ68_BIOGL
1	30664571	30697271	1e-106		two pore calcium channel protein 1-like n=1 Tax=Crassostrea virginica TaxID=6565 RepID=UPI000BAFB13C
1	30724064	30724936	1e-29		Reverse transcriptase domain-containing protein (Fragment) n=1 Tax=Thiothrix sp. TaxID=1032 RepID=A0A432UTE6_9GAMM
1	30773454	117627_27
1	30843714	117672_0
1	30895408	30902220	5e-81		DUF4430 domain-containing protein n=1 Tax=Biomphalaria glabrata TaxID=6526 RepID=A0A2C9JEK0_BIOGL
1	30912970	30943095	9e-42		probable G-protein coupled receptor 75 n=1 Tax=Pecten maximus TaxID=6579 RepID=UPI001458B351
1	30949894	30980779	3e-166		methyltransferase-like protein 24 n=1 Tax=Pecten maximus TaxID=6579 RepID=UPI001458F665
1	30982773	31046132	7e-180		flocculation protein FLO11-like n=1 Tax=Pecten maximus TaxID=6579 RepID=UPI0014583898
1	31012917	117739_27
1	31127506	117805_7
1	31152733	31155593	0		TD and POZ domain-containing protein 1 n=1 Tax=Mizuhopecten yessoensis TaxID=6573 RepID=A0A210QRH9_MIZYE
1	31162558	117825_7
1	31232462	117865_20
1	31285932	31338362	0		Mediator of RNA polymerase II transcription subunit 6 n=2 Tax=Pectinidae TaxID=6566 RepID=A0A210Q453_MIZYE
1	31292642	1_31292642	0.0561	0.046458
1	31302595	117891_10
1	31346524	31353403	5e-95		nuclear receptor ROR-beta-like n=1 Tax=Pecten maximus TaxID=6579 RepID=UPI0014584C20
1	31352913	117902_3
1	31443538	31459798	0		Gastric intrinsic factor-like protein 1 n=1 Tax=Hyriopsis cumingii TaxID=165450 RepID=A0A0P0M6C9_HYRCU
1	31518533	31547765	3e-172		NPC intracellular cholesterol transporter 2 n=5 Tax=Canidae TaxID=9608 RepID=NPC2_CANLF
1	31518751	117972_5
1	31544745	117985_33
1	31573886	31576110	1e-24		leucine-rich repeat-containing protein 74B-like n=1 Tax=Aplysia californica TaxID=6500 RepID=UPI00065BACCC
1	31577669	31601129	0		Inner centromere protein n=3 Tax=Crassostrea gigas TaxID=29159 RepID=K1QVE4_CRAGI
1	31609169	31622975	0		Peptide-O-fucosyltransferase n=2 Tax=Lingula unguis TaxID=7574 RepID=A0A1S3ICK0_LINUN
1	31638100	31644051	7e-18		G_PROTEIN_RECEP_F1_2 domain-containing protein n=1 Tax=Lottia gigantea TaxID=225164 RepID=V4CKA4_LOTGI
1	31693833	118052_0
1	31718611	31719278	2e-15		Endo/exonuclease/phosphatase domain-containing protein n=1 Tax=Lottia gigantea TaxID=225164 RepID=V3ZTJ7_LOTGI
1	31719399	31721193	7e-07		sporulation-specific protein 15-like n=1 Tax=Saccoglossus kowalevskii TaxID=10224 RepID=UPI0003F0B873
1	31788811	31891029	3e-36		Homeobox protein six1b n=7 Tax=Pectinidae TaxID=6566 RepID=A0A210Q488_MIZYE
1	31907514	118167_1
1	31992167	118204_1
1	32053604	32109583	0		RNA-binding protein Nova-1 n=12 Tax=Pectinidae TaxID=6566 RepID=A0A210R485_MIZYE
1	32097905	118232_9
1	32105419	118238_1
1	32113659	32126435	0		Proteasome subunit alpha type n=4 Tax=Pectinidae TaxID=6566 RepID=A0A210PJ89_MIZYE
1	32143462	32153276	8e-58		Vacuolar protein sorting-associated protein 53 homolog n=1 Tax=Trichuris muris TaxID=70415 RepID=A0A5S6QT54_TRIMR
1	32164401	32225867	3e-24		N-terminal kinase-like protein isoform X1 n=2 Tax=Pecten maximus TaxID=6579 RepID=UPI0014590023
1	32177141	118281_35
1	32259773	32270203	0		RBR-type E3 ubiquitin transferase n=3 Tax=Crassostrea gigas TaxID=29159 RepID=K1Q5J3_CRAGI
1	32334304	32352857	6e-54		proto-oncogene c-Fos-like isoform X1 n=8 Tax=Crassostrea virginica TaxID=6565 RepID=UPI000BAE6B5C
1	32345990	118350_2
1	32354875	205034_8
1	32369380	205026_9
1	32369947	32397162	0		serum factor response D-like n=4 Tax=Pectinidae TaxID=6566 RepID=UPI000B45CF3D
1	32372918	205022_29
1	32676381	204878_1
1	32814400	32898275	0		TOG array regulator of axonemal microtubules protein 1-like n=1 Tax=Crassostrea gigas TaxID=29159 RepID=UPI00148A34F4
1	32824120	204826_15
1	32938424	33010944	5e-164		pyridoxal kinase-like n=2 Tax=Crassostrea virginica TaxID=6565 RepID=UPI000BAF3A43
1	33013783	204734_7
1	33031360	33057824	3e-43		Alpha-(1,6)-fucosyltransferase n=3 Tax=Crassostrea gigas TaxID=29159 RepID=K1RWV4_CRAGI
1	33170588	33174331	0		Cyclic nucleotide-gated channel rod photoreceptor subunit alpha n=2 Tax=Mizuhopecten yessoensis TaxID=6573 RepID=A0A210PQ56_MIZYE
1	33180770	33202857	3e-32		Pre-mRNA-processing factor 39 n=2 Tax=Pectinidae TaxID=6566 RepID=A0A210QNR7_MIZYE
1	33210842	33229114	5e-65		transmembrane protein 179-like n=1 Tax=Pecten maximus TaxID=6579 RepID=UPI0014583B95
1	33250747	33254588	4e-133		alkaline ceramidase 3-like n=1 Tax=Pecten maximus TaxID=6579 RepID=UPI0014590DE1
1	33255664	33271570	7e-46		alkaline ceramidase 3-like n=1 Tax=Octopus vulgaris TaxID=6645 RepID=UPI001140DAA7
1	33281062	33314832	0		Leucine rich repeat only protein 10 n=1 Tax=Argopecten irradians TaxID=31199 RepID=A0A2R3SK04_ARGIR
1	33314747	310545_26
1	33400013	310524_17
1	33414445	231918_26
1	33420351	33427181	8e-179		transcription factor CP2-like protein 1 n=1 Tax=Rhincodon typus TaxID=259920 RepID=UPI0009A26617
1	33895306	231887_24
1	33919002	231879_3
1	33932680	231876_15
1	33986395	231856_3
1	34084896	231816_9
1	34098723	231811_1
1	34182268	34196883	2e-40		ras-related protein Rab-32B-like n=2 Tax=Crassostrea TaxID=6564 RepID=UPI00148AB602
1	34213532	231784_4
1	34324436	231747_2
1	34336261	34503757	2e-116		sushi, von Willebrand factor type A, EGF and pentraxin domain-containing protein 1-like n=1 Tax=Crassostrea virginica TaxID=6565 RepID=UPI000BAF6A1E
1	34451769	231712_11
1	34491156	233498_15
1	34512287	233503_18
1	34514454	233507_11
1	34546359	233522_32
1	34589758	233542_28
1	34625041	34650200	5e-42		BTB/POZ domain-containing protein 9 n=2 Tax=Pectinidae TaxID=6566 RepID=A0A210QUD8_MIZYE
1	34658376	34684550	2e-98		Equilibrative nucleoside transporter 3 n=1 Tax=Mizuhopecten yessoensis TaxID=6573 RepID=A0A210PZD0_MIZYE
1	34708561	34720499	0		Nose resistant to fluoxetine protein 6 n=2 Tax=Mizuhopecten yessoensis TaxID=6573 RepID=A0A210PUX8_MIZYE
1	34730714	34745245	5e-19		histone-lysine N-methyltransferase setd3-like n=2 Tax=Crassostrea gigas TaxID=29159 RepID=UPI0005C354A4
1	34748396	34756802	2e-141		Beta,beta-carotene 15,15'-monooxygenase n=1 Tax=Mizuhopecten yessoensis TaxID=6573 RepID=A0A210PVJ3_MIZYE
1	34759150	34782181	0		ATP-dependent Clp protease ATP-binding subunit clpX-like, mitochondrial n=2 Tax=Oncorhynchus TaxID=8016 RepID=UPI001131665A
1	34784905	34788018	3e-175		Tripartite motif-containing protein 56 n=2 Tax=Crassostrea TaxID=6564 RepID=K1QPP1_CRAGI
1	34792476	34820011	0		Coiled-coil domain-containing protein lobo-like n=3 Tax=Pectinidae TaxID=6566 RepID=A0A210R0D1_MIZYE
1	34868653	34889279	1e-40		acyl-CoA:lysophosphatidylglycerol acyltransferase 1-like n=1 Tax=Pecten maximus TaxID=6579 RepID=UPI001458DCFD
1	34885250	233647_34
1	34891280	34903600	2e-47		multiple coagulation factor deficiency protein 2 homolog n=1 Tax=Pecten maximus TaxID=6579 RepID=UPI001458B55C
1	34897512	233654_2
1	35300246	233687_0
1	35363713	266395_7
1	35507759	270640_10
1	35815691	262195_19
1	35815700	262196_5
1	35822106	35886663	2e-65		Gq n=4 Tax=Lophotrochozoa TaxID=1206795 RepID=L7S051_PLADU
1	35920591	262182_16
1	35938966	262176_19
1	35940532	262175_6
1	35942849	35995512	0		LOW QUALITY PROTEIN: sodium-coupled monocarboxylate transporter 1-like n=1 Tax=Pecten maximus TaxID=6579 RepID=UPI001458C97F
1	35950655	262173_31
1	35996513	36041831	9e-114		Exodeoxyribonuclease III n=2 Tax=Bathymodiolus brooksi thiotrophic gill symbiont TaxID=1052209 RepID=A0A482YQ74_9BACT
1	36175019	277766_28
1	36175473	277767_2	0.100153	0.00331368
1	36231937	36298461	2e-81		Nidogen-1 n=2 Tax=Mizuhopecten yessoensis TaxID=6573 RepID=A0A210QIZ4_MIZYE
1	36301090	36333475	9e-92		N-acetylated-alpha-linked acidic dipeptidase 2-like n=1 Tax=Pecten maximus TaxID=6579 RepID=UPI00145877A8
1	36348151	36368285	4e-83		Transmembrane protein 229A n=2 Tax=Pectinidae TaxID=6566 RepID=A0A210Q0Q2_MIZYE
1	36369106	36387177	0		TAF6-like RNA polymerase II p300/CBP-associated factor-associated factor 65 kDa subunit 6L n=2 Tax=Pectinidae TaxID=6566 RepID=UPI000B45C3D4
1	36392333	36425159	0		Pyruvate carboxylase n=15 Tax=Crassostrea TaxID=6564 RepID=K1QHI5_CRAGI
1	36422096	299849_33
1	36455326	299865_18
1	36535000	36583028	0		exportin-5-like n=1 Tax=Pecten maximus TaxID=6579 RepID=UPI0014584AE0
1	36561770	299916_16
1	36585810	36614238	8e-86		tetratricopeptide repeat protein 13-like n=2 Tax=Pecten maximus TaxID=6579 RepID=UPI001458D8E0
1	36614283	36624037	9e-129		peripherin-2-like n=1 Tax=Pecten maximus TaxID=6579 RepID=UPI001457F7EB
1	36701474	36736407	0		YLP motif-containing protein 1 isoform X1 n=6 Tax=Crassostrea gigas TaxID=29159 RepID=UPI00148A21E4
1	36803195	300039_9
1	36887101	36891470	2e-92		Reverse transcriptase domain-containing protein n=12 Tax=Pelodiscus sinensis TaxID=13735 RepID=K7F1H9_PELSI
1	36960132	36963999	1e-20		39S ribosomal protein S18a, mitochondrial-like n=1 Tax=Pecten maximus TaxID=6579 RepID=UPI0014584C57
1	36963849	300124_3	0.107692	0.00220947
1	36966707	36983880	0		Coiled-coil domain-containing protein 61 n=4 Tax=Pectinidae TaxID=6566 RepID=A0A210QJF8_MIZYE
1	36969847	300127_32
1	36983018	300131_2
1	36983985	300132_10
1	36994532	37018190	2e-93		Dorsal protein n=1 Tax=Pinctada fucata TaxID=50426 RepID=A0A513Q626_PINFU
1	37016490	300139_8
1	37019778	37075853	6e-157		nephrocystin-1-like n=1 Tax=Crassostrea virginica TaxID=6565 RepID=UPI000BB0B0B0
1	37075926	37090763	6e-28		DNA-directed RNA polymerases I and III subunit RPAC1 n=2 Tax=Pectinidae TaxID=6566 RepID=A0A210R2I6_MIZYE
1	37153292	152317_5
1	37173067	152330_3
1	37200464	152342_25
1	37200829	152343_32
1	37219233	152354_16
1	37260678	152380_5
1	37260692	152381_9
1	37280378	152394_0
1	37315472	152414_6
1	37327824	37403493	5e-62		F-box only protein 11 n=3 Tax=Crassostrea TaxID=6564 RepID=K1QL91_CRAGI
1	37377364	152436_7
1	37408149	37421200	0		26S protease regulatory subunit 4 n=2 Tax=Crassostrea TaxID=6564 RepID=K1QLT5_CRAGI
1	37424204	37435676	0		Enolase-phosphatase E1 n=2 Tax=Crassostrea TaxID=6564 RepID=K1PQI4_CRAGI
1	37437611	152461_17	0.0835289	0.00505428
1	37439417	37456005	7e-155		serine/threonine-protein kinase VRK1 n=1 Tax=Crassostrea gigas TaxID=29159 RepID=UPI00148AAFD4
1	37456146	37462261	0		BCS1-like protein (Fragment) n=1 Tax=Lottia gigantea TaxID=225164 RepID=V4AYT0_LOTGI
1	37462276	37521584	2e-101		Leucine-rich repeat-containing protein 9 n=14 Tax=Pectinidae TaxID=6566 RepID=A0A210QFD0_MIZYE
1	37484595	152486_32
1	37541017	37587648	5e-23		Polypeptide N-acetylgalactosaminyltransferase n=3 Tax=Pectinidae TaxID=6566 RepID=A0A210QRG7_MIZYE
1	37588039	37597566	8e-78		sarcoplasmic reticulum histidine-rich calcium-binding protein-like n=1 Tax=Aplysia californica TaxID=6500 RepID=UPI00065B8428
1	37602122	37613355	1e-157		Aldose 1-epimerase n=2 Tax=Mizuhopecten yessoensis TaxID=6573 RepID=A0A210QQ41_MIZYE
1	37614755	152532_0
1	37695272	37787678	0		cytoplasmic dynein 1 heavy chain 1-like isoform X1 n=4 Tax=Pecten maximus TaxID=6579 RepID=UPI001458D8AE
1	37746216	265011_32
1	37790098	37818484	3e-27		actin-related protein 10-like n=1 Tax=Crassostrea gigas TaxID=29159 RepID=UPI00148AE11D
1	37804360	265032_28
1	37852857	265044_20
1	37874028	37944916	4e-32		probable maltase n=1 Tax=Pecten maximus TaxID=6579 RepID=UPI0014585B0E
1	37913887	265054_5
1	37958592	37987700	1e-36		2'-phosphotransferase n=3 Tax=Lingula unguis TaxID=7574 RepID=A0A1S3J927_LINUN
1	38039415	38059019	2e-122		leucine-rich repeat-containing protein 74B-like n=1 Tax=Crassostrea virginica TaxID=6565 RepID=UPI000BAF8702
1	38079813	38106809	0		SUMO-activating enzyme subunit 1 n=3 Tax=Pectinidae TaxID=6566 RepID=A0A210R2U4_MIZYE
1	38106839	38116828	5e-60		signal recognition particle 14 kDa protein n=2 Tax=Crassostrea TaxID=6564 RepID=UPI0005C37FAE
1	38113860	1_38113860	0.0662	0.035664
1	38118680	38134204	0		Mediator complex subunit 29 n=2 Tax=Pectinidae TaxID=6566 RepID=A0A210QNV5_MIZYE
1	38128704	156158_33
1	38181971	156147_7
1	38258155	156126_3
1	38262037	156123_35
1	38262376	156122_9
1	38267195	156120_3
1	38290290	38297245	5e-46		microtubule-associated protein 10-like n=1 Tax=Pecten maximus TaxID=6579 RepID=UPI0014589989
1	38347128	38356487	1e-170		Guanylate cyclase n=3 Tax=Pectinidae TaxID=6566 RepID=A0A210QCM5_MIZYE
1	38359072	156085_30
1	38475898	38491503	6e-143		Integral membrane protein GPR137B n=2 Tax=Pectinidae TaxID=6566 RepID=A0A210QE18_MIZYE
1	38491620	38500235	9e-76		fucolectin-1-like n=1 Tax=Crassostrea gigas TaxID=29159 RepID=UPI00148A783B
1	38494433	156006_4
1	38500936	155998_25
1	38505764	38555142	0		Sorting nexin n=3 Tax=Crassostrea TaxID=6564 RepID=K1PEW1_CRAGI
1	38510571	155996_15
1	38556114	38619505	6e-35		coiled-coil domain-containing protein 175-like isoform X1 n=2 Tax=Pecten maximus TaxID=6579 RepID=UPI001458FBC6
1	38594118	155964_34
1	38620621	38637902	0		Solute carrier family 46 member 3 n=1 Tax=Mizuhopecten yessoensis TaxID=6573 RepID=A0A210QE36_MIZYE
1	38639030	38644963	1e-12		Small nuclear ribonucleoprotein Sm D2 n=13 Tax=Eumetazoa TaxID=6072 RepID=C3XTF6_BRAFL
1	38658133	38734114	1e-94		protein enabled homolog n=1 Tax=Aplysia californica TaxID=6500 RepID=UPI00065B7878
1	38687851	155934_18
1	38697629	155930_7
1	38723660	155916_3
1	38737800	155905_27
1	38762612	38775712	0		Protein MEMO1 n=2 Tax=Pectinidae TaxID=6566 RepID=A0A210QNT9_MIZYE
1	38768947	155894_19
1	38777369	155889_32
1	38778771	38797846	0		LOW QUALITY PROTEIN: protein STPG4-like n=1 Tax=Pecten maximus TaxID=6579 RepID=UPI0014584AF0
1	38802951	38812647	1e-46		egl nine homolog 1-like isoform X1 n=2 Tax=Pecten maximus TaxID=6579 RepID=UPI001458ABFF
1	38963790	38969414	0		Hepatopancreas kazal-type proteinase inhibitor n=1 Tax=Penaeus monodon TaxID=6687 RepID=Q6WVJ6_PENMO
1	39071997	39166951	2e-145		melatonin receptor type 1A-like n=2 Tax=Pectinidae TaxID=6566 RepID=UPI000B4583C5
1	39161613	155686_34
1	39168237	155683_34
1	39198674	39232883	1e-78		D-beta-hydroxybutyrate dehydrogenase, mitochondrial-like n=1 Tax=Pecten maximus TaxID=6579 RepID=UPI001458228E
1	39243556	39287986	0		Sphingolipid 4-desaturase n=1 Tax=Lottia gigantea TaxID=225164 RepID=V4ARV4_LOTGI
1	39256481	155632_19
1	39308574	39330531	0		Calmodulin n=1 Tax=Nilaparvata lugens TaxID=108931 RepID=A0A1I9WLC8_NILLU
1	39333716	39336602	3e-12		Acyl_transf_3 domain-containing protein (Fragment) n=1 Tax=Elysia chlorotica TaxID=188477 RepID=A0A433U4T2_ELYCH
1	39334158	314600_33
1	39350013	39430373	2e-147		LOW QUALITY PROTEIN: von Willebrand factor D and EGF domain-containing protein n=1 Tax=Vombatus ursinus TaxID=29139 RepID=UPI000FFD8A91
1	39368771	202019_15
1	39368904	202018_18
1	39403605	202007_1
1	39443193	201996_0
1	39464915	39476889	0		Calmodulin n=2 Tax=Tentaculata TaxID=140493 RepID=K9LM65_MNELE
1	39485925	39532718	4e-25		2-aminoethylphosphonate--pyruvate transaminase n=1 Tax=Mizuhopecten yessoensis TaxID=6573 RepID=A0A210Q0A6_MIZYE
1	39526950	1_39526950	0.1374	0.001298
1	39528547	1_39528547	0.0788	0.01381
1	39583475	39594391	0		CARD domain-containing protein n=2 Tax=Crassostrea TaxID=6564 RepID=K1RK16_CRAGI
1	39589195	201908_18
1	39598603	39600661	2e-30		BHLH domain-containing protein n=16 Tax=Ecdysozoa TaxID=1206794 RepID=A0A0K0ENM6_STRER
1	39609296	201897_33
1	39615808	39657961	3e-41		RRM domain-containing protein n=1 Tax=Strigamia maritima TaxID=126957 RepID=T1IPR9_STRMM
1	39626955	201889_31
1	39721130	39729140	5e-130		tRNA (guanine(37)-N1)-methyltransferase n=1 Tax=Lingula unguis TaxID=7574 RepID=A0A1S3IL28_LINUN
1	39820994	39822767	6e-37		MoCF_biosynth domain-containing protein n=1 Tax=Lottia gigantea TaxID=225164 RepID=V4AGS7_LOTGI
1	39885985	39893955	4e-22		D-beta-hydroxybutyrate dehydrogenase, mitochondrial-like n=2 Tax=Mizuhopecten yessoensis TaxID=6573 RepID=UPI000B45E077
1	40004472	40014939	4e-41		RNA helicase n=1 Tax=Sinocyclocheilus anshuiensis TaxID=1608454 RepID=A0A671MQG7_9TELE
1	40021060	40022592	4e-30		F-box only protein 2-like n=1 Tax=Pantherophis guttatus TaxID=94885 RepID=UPI0014858D54
1	40037399	40044247	9e-75		F-box only protein 6 n=1 Tax=Anabarilius grahami TaxID=495550 RepID=A0A3N0Z5J8_ANAGA
1	40082921	201646_20
1	40083948	201645_2
1	40126624	40142416	7e-176		Calmodulin n=1 Tax=Papilio xuthus TaxID=66420 RepID=A0A194PR47_PAPXU
1	40183318	141142_0
1	40208948	40231632	7e-44		Ribosomal_S10 domain-containing protein n=1 Tax=Capitella teleta TaxID=283909 RepID=R7TXF9_CAPTE
1	40246971	141125_7
1	40267712	141116_9
1	40280237	141108_7
1	40320038	40345777	6e-29		polypeptide N-acetylgalactosaminyltransferase 16-like n=3 Tax=Pectinidae TaxID=6566 RepID=UPI000B459233
1	40395033	141064_25
1	40399038	40414296	0		heparan sulfate glucosamine 3-O-sulfotransferase 5-like isoform X3 n=1 Tax=Crassostrea virginica TaxID=6565 RepID=UPI000BB07E73
1	40585327	40605413	2e-176		AP-5 complex subunit mu-1 n=1 Tax=Crassostrea gigas TaxID=29159 RepID=UPI00148AABBB
1	40749736	40752827	5e-45		mRNA decay activator protein ZFP36L1 n=1 Tax=Lingula unguis TaxID=7574 RepID=A0A1S3HJJ7_LINUN
1	40801083	246558_16
1	41200964	41217896	3e-162		BRO1 domain-containing protein BROX n=2 Tax=Crassostrea TaxID=6564 RepID=UPI00148AA1A8
1	41201107	288468_2
1	41209079	288463_32
1	41306438	41370564	2e-20		transmembrane protein 87A-like n=1 Tax=Pecten maximus TaxID=6579 RepID=UPI0014589039
1	41351681	288378_2
1	41361891	288372_1
1	41363113	288370_24
1	41482972	81797_16
1	41492946	41503961	4e-56		Fumarate hydratase n=1 Tax=Tribolium castaneum TaxID=7070 RepID=D6WJB5_TRICA
1	41524617	41588345	1e-120		nuclear export mediator factor Nemf-like n=1 Tax=Aplysia californica TaxID=6500 RepID=UPI0003597612
1	41638357	41666010	4e-66		Apple domain-containing protein (Fragment) n=1 Tax=Lottia gigantea TaxID=225164 RepID=V4CL71_LOTGI
1	41661161	81728_8
1	41662085	81724_2
1	41715334	81701_15
1	41855798	81620_34
1	41986757	81546_10
1	42063175	81485_24
1	42114499	42123844	8e-133		Calmodulin n=2 Tax=Eukaryota TaxID=2759 RepID=L1JGV1_GUITC
1	42125207	42148286	0		Dihydroxyacetone phosphate acyltransferase n=2 Tax=Pectinidae TaxID=6566 RepID=A0A210QCY9_MIZYE
1	42132790	1_42132790	0.0612	0.039722
1	42149355	42155305	6e-102		Calmodulin n=1 Tax=Tremella mesenterica (strain ATCC 24925 / CBS 8224 / DSM 1558 / NBRC 9311 / NRRL Y-6157/ RJB 2259-6) TaxID=578456 RepID=R7SC24_TREMS
1	42158017	42170307	1e-34		Calmodulin n=3 Tax=Basidiobolus meristosporus CBS 931.73 TaxID=1314790 RepID=A0A1Y1XTK2_9FUNG
1	42183697	42194118	0		Calmodulin n=2 Tax=Malassezia TaxID=55193 RepID=A0A1M8A3P9_MALS4
1	42193915	81425_32
1	42208903	42214997	1e-60		calmodulin-like n=1 Tax=Saccoglossus kowalevskii TaxID=10224 RepID=UPI0001CBA3D1
1	42221009	42234585	5e-20		Calmodulin n=3 Tax=Bilateria TaxID=33213 RepID=A0A194ALV4_PINFU
1	42295498	42300867	2e-177		Ceh-10 homeodomain-containing homolog n=1 Tax=Lottia gigantea TaxID=225164 RepID=V4ABE0_LOTGI
1	42318652	81342_7
1	42328131	42337181	0		McKusick-Kaufman/Bardet-Biedl syndromes putative chaperonin n=2 Tax=Mizuhopecten yessoensis TaxID=6573 RepID=A0A210QE10_MIZYE
1	42370738	42380345	1e-62		Solute carrier family 25 member 45 n=3 Tax=Crassostrea gigas TaxID=29159 RepID=K1PKE2_CRAGI
1	42409299	81299_18
1	42418942	42425078	2e-86		Hepatocyte nuclear factor 3-beta n=2 Tax=Pectinidae TaxID=6566 RepID=A0A210QCG1_MIZYE
1	42553301	81194_27	0.0804252	0.0076404
1	42577557	81180_5
1	42594114	42601866	9e-22		Malate dehydrogenase n=2 Tax=Oikopleura dioica TaxID=34765 RepID=E4WX88_OIKDI
1	42602082	81172_33
1	42606594	42663239	4e-32		poly [ADP-ribose] polymerase tankyrase-like n=1 Tax=Pecten maximus TaxID=6579 RepID=UPI0014588B37
1	42686896	42694733	9e-163		GTP-binding protein YPTC1 n=3 Tax=core chlorophytes TaxID=2692248 RepID=I0YS06_COCSC
1	42706173	42724973	8e-24		NUC153 domain-containing protein n=1 Tax=Lottia gigantea TaxID=225164 RepID=V4BAF6_LOTGI
1	42746299	81100_29
1	42762494	81088_27
1	42772275	81082_4
1	42839960	81053_34
1	42840602	81052_2
1	42880844	81037_19
1	42885287	42980873	0		Homeobox protein Meis2 n=2 Tax=Pectinidae TaxID=6566 RepID=A0A210QXA1_MIZYE
1	42910970	81006_5
1	42933121	80989_31
1	43090050	80887_33
1	43090087	80886_6
1	43147843	80842_31
1	43159250	43181130	4e-33		Calmodulin n=1 Tax=Allomyces macrogynus (strain ATCC 38327) TaxID=578462 RepID=A0A0L0RZJ7_ALLM3
1	43289910	43300953	9e-17		ATP-binding cassette sub-family G member 5 n=2 Tax=Pectinidae TaxID=6566 RepID=A0A210Q7Z0_MIZYE
1	43306904	43321521	0		ATP-binding cassette sub-family G member 5 n=2 Tax=Crassostrea gigas TaxID=29159 RepID=K1R5C9_CRAGI
1	43325447	43364365	4e-15		ATP-binding cassette sub-family G member 5 n=2 Tax=Pectinidae TaxID=6566 RepID=A0A210Q7Z0_MIZYE
1	43331114	1_43331114	0.1147	0.008894
1	43368396	43399933	0		ATP-binding cassette sub-family G member 8 n=3 Tax=Pectinidae TaxID=6566 RepID=A0A210Q801_MIZYE
1	43369804	80738_9
1	43412411	80713_25
1	43416228	80712_33
1	43442495	80704_11
1	43452592	80696_6
1	43457103	43507937	1e-144		Forkhead box protein N3 n=3 Tax=Crassostrea TaxID=6564 RepID=K1PIM9_CRAGI
1	43473951	80683_19
1	43524972	43547374	0		ectonucleoside triphosphate diphosphohydrolase 3-like isoform X1 n=2 Tax=Pecten maximus TaxID=6579 RepID=UPI001457F166
1	43571351	80636_20
1	43628918	80626_5
1	43638590	80621_34
1	43712993	43735581	0		START domain-containing protein n=1 Tax=Lottia gigantea TaxID=225164 RepID=V3Z9V0_LOTGI
1	43736849	43885024	2e-179		cleavage and polyadenylation specificity factor subunit 2-like n=3 Tax=Crassostrea TaxID=6564 RepID=UPI0009753606
1	43829324	282361_0
1	43888433	43903650	1e-44		eIF-2-alpha kinase GCN2-like n=2 Tax=Crassostrea gigas TaxID=29159 RepID=UPI0005C3C47A
1	43921557	43923935	2e-44		Non-specific serine/threonine protein kinase n=2 Tax=Pomacea canaliculata TaxID=400727 RepID=A0A2T7NZ57_POMCA
1	43925331	43930395	8e-17		Non-specific serine/threonine protein kinase n=2 Tax=Lingula unguis TaxID=7574 RepID=A0A1S3HKR1_LINUN
1	44027413	44036377	0		dehydrogenase/reductase SDR family member 7-like isoform X1 n=3 Tax=Crassostrea virginica TaxID=6565 RepID=UPI000BAFBAEB
1	44047278	44081246	0		TFIIH basal transcription factor complex helicase XPD subunit-like n=2 Tax=Pectinidae TaxID=6566 RepID=UPI000B45BA9C
1	44126423	44130802	2e-72		G_PROTEIN_RECEP_F1_2 domain-containing protein n=1 Tax=Biomphalaria glabrata TaxID=6526 RepID=A0A2C9JYM3_BIOGL
1	44133448	44140813	3e-80		KIF-binding protein n=1 Tax=Lingula unguis TaxID=7574 RepID=A0A1S3IDL7_LINUN
1	44142307	44163360	0		glutamate receptor 3-like n=1 Tax=Pecten maximus TaxID=6579 RepID=UPI00145902DA
1	44246494	44258511	0		CAAX prenyl protease 2-like n=2 Tax=Crassostrea virginica TaxID=6565 RepID=UPI000BAEEB30
1	44289440	282118_11
1	44327659	44331228	3e-70		myosin-I heavy chain-like isoform X1 n=6 Tax=Pectinidae TaxID=6566 RepID=UPI0014582757
1	44342404	282090_10
1	44389631	44426227	0		myosin-I heavy chain-like isoform X1 n=6 Tax=Pectinidae TaxID=6566 RepID=UPI0014582757
1	44391558	282061_34
1	44627962	281940_28
1	44634531	44644428	1e-89		solute carrier family 46 member 3-like n=1 Tax=Pecten maximus TaxID=6579 RepID=UPI00145917CB
1	44699767	281902_33
1	44807250	44831068	0		Coiled-coil domain-containing protein C6orf97 n=6 Tax=Crassostrea TaxID=6564 RepID=K1Q8J9_CRAGI
1	44834449	44856016	8e-09		Serine/threonine-protein phosphatase 4 regulatory subunit 3A n=6 Tax=Pectinidae TaxID=6566 RepID=A0A210PML1_MIZYE
1	44843480	82062_20
1	44859141	44884693	0		RNA helicase n=2 Tax=Octopus TaxID=6643 RepID=A0A0L8GN93_OCTBM
1	44889442	45053538	2e-13		spectrin beta chain, non-erythrocytic 5 isoform X1 n=27 Tax=Crassostrea TaxID=6564 RepID=UPI00148AD34B
1	44904622	82081_9
1	44958101	82100_0
1	45013096	82128_9
1	45056728	45060488	0		LOW QUALITY PROTEIN: uncharacterized protein LOC111111130 n=1 Tax=Crassostrea virginica TaxID=6565 RepID=UPI000BAE8DD1
1	45064116	45087913	0		CB1 cannabinoid receptor-interacting protein 1 n=2 Tax=Pectinidae TaxID=6566 RepID=A0A210PGQ0_MIZYE
1	45113534	82173_27
1	45151897	45166396	0		bifunctional D-cysteine desulfhydrase/1-aminocyclopropane-1-carboxylate deaminase, mitochondrial-like n=1 Tax=Pomacea canaliculata TaxID=400727 RepID=UPI000D739548
1	45230856	82224_8
1	45277727	45279039	2e-06		ryanodine receptor-like isoform X1 n=4 Tax=Crassostrea gigas TaxID=29159 RepID=UPI0005C3CA00
1	45301544	45358002	8e-79		glia maturation factor gamma isoform X1 n=1 Tax=Lingula unguis TaxID=7574 RepID=A0A1S3I3D4_LINUN
1	45353965	82289_33
1	45374788	45389144	4e-112		zinc finger protein-like 1 n=1 Tax=Pecten maximus TaxID=6579 RepID=UPI0014582543
1	45479498	45507124	0		lysoplasmalogenase-like protein TMEM86A n=2 Tax=Crassostrea virginica TaxID=6565 RepID=UPI000BAEC71A
1	45581681	45587298	2e-94		Testis-specific serine/threonine kinase (Fragment) n=1 Tax=Ruditapes philippinarum TaxID=129788 RepID=A0A3Q8AYT5_RUDPH
1	45592322	45627169	4e-108		Protein lap4 n=1 Tax=Mizuhopecten yessoensis TaxID=6573 RepID=A0A210PQ59_MIZYE
1	45652659	45689227	5e-50		glutaminyl-peptide cyclotransferase-like n=1 Tax=Crassostrea virginica TaxID=6565 RepID=UPI000BAF62BB
1	45704385	45708828	0		tRNA (adenine(58)-N(1))-methyltransferase catalytic subunit TRMT61A n=2 Tax=Mizuhopecten yessoensis TaxID=6573 RepID=A0A210PQB3_MIZYE
1	45783036	82466_28
1	45795653	82473_35
1	45809014	82482_3
1	45809768	82483_2
1	45845498	82504_26
1	45876581	45916809	5e-12		Bone morphogenetic protein 2 n=1 Tax=Sinonovacula constricta TaxID=98310 RepID=A0A5J6SGX7_SINCO
1	45880343	82531_17
1	45882498	82533_26
1	45952830	46053812	0		ephrin type-A receptor 3-like n=1 Tax=Pecten maximus TaxID=6579 RepID=UPI0014586170
1	45956613	82577_25
1	46070240	82628_19
1	46090622	46178212	2e-129		apoptosis-stimulating of p53 protein 2-like n=1 Tax=Mizuhopecten yessoensis TaxID=6573 RepID=UPI000B458542
1	46179377	46189795	0		Epididymal secretory protein E1 16.5 kDa secretory protein n=1 Tax=Channa argus TaxID=215402 RepID=A0A6G1QFD5_9TELE
1	46181361	1_46181361	0.0804	0.026012
1	46191410	46222093	5e-57		Fasciculation and elongation protein zeta-2 n=2 Tax=Pectinidae TaxID=6566 RepID=A0A210QRT8_MIZYE
1	46256619	46276491	2e-58		Transmembrane protein 63B n=4 Tax=Mizuhopecten yessoensis TaxID=6573 RepID=A0A210PXJ4_MIZYE
1	46277109	46302062	0		spermatogenesis-associated protein 7-like n=1 Tax=Pecten maximus TaxID=6579 RepID=UPI0014580C68
1	46302196	46313658	1e-63		Thioredoxin domain-containing protein 16 n=2 Tax=Crassostrea gigas TaxID=29159 RepID=K1PYH4_CRAGI
1	46412364	82782_34
1	46413073	82785_11
1	46440666	46459210	0		HHIP-like protein 1 n=1 Tax=Mizuhopecten yessoensis TaxID=6573 RepID=A0A210R1B6_MIZYE
1	46499159	46504354	0		Zinc finger protein 26 n=1 Tax=Mizuhopecten yessoensis TaxID=6573 RepID=A0A210Q433_MIZYE
1	46518273	46546521	0		FERM domain-containing protein n=1 Tax=Pomacea canaliculata TaxID=400727 RepID=A0A2T7PI32_POMCA
1	46549894	46561796	0		Toll-like receptor e n=1 Tax=Mytilus galloprovincialis TaxID=29158 RepID=M1R4V7_MYTGA
1	46563713	82852_34
1	46612918	82869_33
1	46746195	46753877	5e-103		anaphase-promoting complex subunit 1-like n=1 Tax=Mizuhopecten yessoensis TaxID=6573 RepID=UPI000B45F8CA
1	46788310	46790940	8e-127		anaphase-promoting complex subunit 1-like n=2 Tax=Mizuhopecten yessoensis TaxID=6573 RepID=UPI000B459075
1	46809089	46878936	2e-124		elongation factor 1-gamma-like n=2 Tax=Crassostrea virginica TaxID=6565 RepID=UPI000BAF93CB
1	46813225	82954_33
1	46820344	82957_26
1	46851091	82970_17
1	47015757	83051_7
1	47106335	47139043	3e-125		Tetratricopeptide repeat protein 7B n=3 Tax=Pectinidae TaxID=6566 RepID=A0A210QNP6_MIZYE
1	47240644	47311472	7e-82		interferon-induced protein 44-like n=1 Tax=Pecten maximus TaxID=6579 RepID=UPI001457EB6D
1	47341732	47376391	3e-109		tctex1 domain-containing protein 1-like n=2 Tax=Crassostrea virginica TaxID=6565 RepID=UPI000BB07998
1	47391752	47437986	0		interferon-induced protein 44-like n=3 Tax=Crassostrea virginica TaxID=6565 RepID=UPI000BAFFC05
1	47395525	134228_19
1	47446400	134233_19
1	47454356	47468275	0		Calmodulin n=2 Tax=Crassostrea gigas TaxID=29159 RepID=K1PKM8_CRAGI
1	47473177	134242_11
1	47476673	47476974	1e-111		DUF4817 domain-containing protein n=1 Tax=invertebrate metagenome TaxID=1711999 RepID=A0A2H9T2F8_9ZZZZ
1	47478816	134246_8
1	47502407	47503037	7e-160		52 kDa repressor of the inhibitor of the protein kinase-like n=1 Tax=Pecten maximus TaxID=6579 RepID=UPI0014591166
1	47532205	47551034	0		Calmodulin n=1 Tax=Chelonia mydas TaxID=8469 RepID=M7B115_CHEMY
1	47552232	47577061	0		translation initiation factor IF-2, mitochondrial-like isoform X1 n=2 Tax=Pomacea canaliculata TaxID=400727 RepID=UPI000D72BFF4
1	47557986	134286_31
1	47567377	134293_0
1	47585129	47604940	6e-178		ras-related protein Rab-10-like n=1 Tax=Crassostrea virginica TaxID=6565 RepID=UPI000BB0C22A
1	47620383	47623847	0		Kunitz-type serine protease inhibitor LmKTT-1a n=3 Tax=Lychas mucronatus TaxID=172552 RepID=VKT21_LYCMC
1	47652255	134324_29
1	47674674	134338_27
1	47690714	47708704	0		RING-type E3 ubiquitin transferase n=2 Tax=Pectinidae TaxID=6566 RepID=A0A210Q9S7_MIZYE
1	47709794	47716931	0		Dpy-30-like protein n=2 Tax=Crassostrea TaxID=6564 RepID=K1Q648_CRAGI
1	47719166	47730725	2e-82		Ubiquitinyl hydrolase 1 n=1 Tax=Biomphalaria glabrata TaxID=6526 RepID=A0A2C9JZ15_BIOGL
1	47734615	134371_0
1	47779233	47810461	1e-62		Cell division control protein 42-like n=3 Tax=Pectinidae TaxID=6566 RepID=A0A0N9HJP0_MIZYE
1	47981769	134501_17	0.107745	0.00211678
1	47987663	134506_5
1	48002004	134515_27
1	48002469	134516_1
1	48034116	48036679	2e-34		keratin-associated protein 10-11 isoform X2 n=1 Tax=Microcebus murinus TaxID=30608 RepID=UPI000989BD19
1	48038230	48082394	4e-54		Mab-21 domain-containing protein n=1 Tax=Mizuhopecten yessoensis TaxID=6573 RepID=A0A210QYE7_MIZYE
1	48115479	48135054	7e-25		Transcription factor fos-like protein n=1 Tax=Anadara broughtonii TaxID=148819 RepID=A0A2P1E2J0_ANABR
1	48174041	134580_8
1	48211374	134596_31
1	48257227	134611_7
1	48268304	48272676	7e-131		Gamma-glutamylcyclotransferase n=2 Tax=Octopus TaxID=6643 RepID=A0A0L8GNC1_OCTBM
1	48395965	134698_1
1	48456478	48678156	3e-96		Delta-like protein n=2 Tax=Pectinidae TaxID=6566 RepID=A0A210PXJ1_MIZYE
1	48661686	134857_9
1	48705355	48720080	1e-61		mitochondrial import inner membrane translocase subunit TIM50-like n=1 Tax=Pomacea canaliculata TaxID=400727 RepID=UPI000D72AD95
1	48723642	134888_8
1	48750698	48758143	0		F-box only protein 28-like n=1 Tax=Pecten maximus TaxID=6579 RepID=UPI0014585FCF
1	48810400	48817832	0		iron-sulfur cluster assembly 2 homolog, mitochondrial n=1 Tax=Crassostrea gigas TaxID=29159 RepID=UPI00148A2D71
1	48825639	307238_16
1	48853388	48882570	3e-178		LOW QUALITY PROTEIN: protein bark beetle-like n=1 Tax=Pecten maximus TaxID=6579 RepID=UPI001459079C
1	48876149	307219_28
1	48897289	48913735	6e-93		Phospholipase DDHD1 n=5 Tax=Pectinidae TaxID=6566 RepID=A0A210PM95_MIZYE
1	48916998	48919807	2e-54		vitamin D(3) 25-hydroxylase-like n=1 Tax=Pecten maximus TaxID=6579 RepID=UPI0014584BD9
1	48940261	49053427	0		Spectrin beta chain n=13 Tax=Crassostrea TaxID=6564 RepID=K1QFR9_CRAGI
1	48974261	307177_10
1	48974554	307176_7
1	48986317	307168_3
1	48998031	307164_20
1	49064295	49104265	0		Chromatin-remodeling ATPase INO80 n=2 Tax=Pectinidae TaxID=6566 RepID=A0A210QRR9_MIZYE
1	49083049	307116_31
1	49108670	278400_29
1	49138637	49142034	1e-41		ADP-ribosylation factor 1 n=5 Tax=Crassostrea gigas TaxID=29159 RepID=K1R0D0_CRAGI
1	49185791	49265070	0		probable inactive tRNA-specific adenosine deaminase-like protein 3 n=1 Tax=Aplysia californica TaxID=6500 RepID=UPI000359E53C
1	49269497	49293082	1e-156		hydrolethalus syndrome protein 1 homolog n=2 Tax=Crassostrea gigas TaxID=29159 RepID=UPI0005C37CBA
1	49359683	49414504	2e-89		Coiled-coil domain-containing protein 9 n=6 Tax=Crassostrea gigas TaxID=29159 RepID=K1RRC3_CRAGI
1	49426698	110316_34
1	49474843	110292_31
1	49475182	110291_32
1	49624913	49640661	7e-156		Gluconolactonase n=3 Tax=Crassostrea TaxID=6564 RepID=K1QCP2_CRAGI
1	49655183	49672947	6e-87		DNA helicase n=2 Tax=Pectinidae TaxID=6566 RepID=A0A210Q0K1_MIZYE
1	49658616	110209_18
1	49691344	49713920	5e-159		Transmembrane protein 260 n=1 Tax=Mizuhopecten yessoensis TaxID=6573 RepID=A0A210QA36_MIZYE
1	49707096	110185_26
1	49715078	49756028	1e-95		Neutral alpha-glucosidase AB n=2 Tax=Mizuhopecten yessoensis TaxID=6573 RepID=A0A210PMP9_MIZYE
1	49874334	49881467	0		lactadherin-like n=1 Tax=Anneissia japonica TaxID=1529436 RepID=UPI001425AAA9
1	49886266	49902490	0		Alpha-2Da adrenergic receptor n=2 Tax=Crassostrea gigas TaxID=29159 RepID=K1PQN2_CRAGI
1	49903820	49912415	1e-79		Epididymal secretory protein E1 n=1 Tax=Mizuhopecten yessoensis TaxID=6573 RepID=A0A210PIR5_MIZYE
1	49914425	49918202	0		epididymal secretory protein E1-like n=1 Tax=Crassostrea virginica TaxID=6565 RepID=UPI000BB08DFE
1	49949337	49992606	0		Alpha-mannosidase n=4 Tax=Mizuhopecten yessoensis TaxID=6573 RepID=A0A210QP56_MIZYE
1	50018360	50035346	5e-162		leucine-rich repeat-containing protein 74B-like n=1 Tax=Pecten maximus TaxID=6579 RepID=UPI0014589A56
1	50033999	109996_19	0.160661	4.35107e-05
1	50091796	50119558	1e-62		Homeobox protein SIX6 n=2 Tax=Pectinidae TaxID=6566 RepID=A0A210Q479_MIZYE
1	50146632	109933_1
1	50217790	50242676	1e-97		ERCC4 domain-containing protein n=1 Tax=Lottia gigantea TaxID=225164 RepID=V4C4L0_LOTGI
1	50256662	50265440	0		Carbohydrate sulfotransferase n=4 Tax=Crassostrea gigas TaxID=29159 RepID=K1PVC1_CRAGI
1	50269001	50282571	0		thioredoxin-related transmembrane protein 1-like n=1 Tax=Pecten maximus TaxID=6579 RepID=UPI001457F183
1	50391376	109830_8
1	50449175	109806_27
1	50473692	50480266	6e-17		selenoprotein W n=3 Tax=Passeriformes TaxID=9126 RepID=UPI000FE24656
1	50483155	50506215	0		2-oxoglutarate dehydrogenase E1 component DHKTD1, mitochondrial n=3 Tax=Pectinidae TaxID=6566 RepID=A0A210QCZ1_MIZYE
1	50493306	109787_29
1	50510219	50598149	0		Fermitin family-like 2 n=3 Tax=Pectinidae TaxID=6566 RepID=A0A210QCY4_MIZYE
1	50518771	109775_27
1	50579590	109757_5
1	50604916	50660664	1e-159		Tetratricopeptide repeat protein 8 n=4 Tax=Pteriomorphia TaxID=6545 RepID=K1P4M1_CRAGI
1	50675099	50677184	6e-17		LOW QUALITY PROTEIN: uncharacterized protein LOC107333394 n=1 Tax=Acropora digitifera TaxID=70779 RepID=UPI00077AC669
1	50679958	50698044	4e-59		ATP-binding cassette sub-family B member 10, mitochondrial-like n=1 Tax=Pecten maximus TaxID=6579 RepID=UPI001458566C
1	50691711	109708_29
1	50741320	50772600	0		Acetyl-coenzyme A synthetase n=2 Tax=Mizuhopecten yessoensis TaxID=6573 RepID=A0A210QYB8_MIZYE
1	50822262	50845444	3e-38		protein kintoun-like n=1 Tax=Aplysia californica TaxID=6500 RepID=UPI00065BDD23
1	50880021	50899334	7e-64		Pecanex-like protein 1 n=2 Tax=Pectinidae TaxID=6566 RepID=A0A210PPH9_MIZYE
1	50901175	109635_7
1	50915657	50922245	4e-41		Pecanex_C domain-containing protein n=4 Tax=Biomphalaria glabrata TaxID=6526 RepID=A0A2C9KA90_BIOGL
1	50929115	50951835	0		Rho GTPase-activating protein 11A n=2 Tax=Mizuhopecten yessoensis TaxID=6573 RepID=A0A210R2F9_MIZYE
1	50939020	109622_19
1	50965890	109614_4
1	50970879	109611_30
1	50980493	50997162	7e-17		phospholipase D3-like n=1 Tax=Pecten maximus TaxID=6579 RepID=UPI001458D51A
1	50991963	109595_3	0.0804252	0.0076404
1	51012899	51061010	2e-22		consortin-like n=1 Tax=Crassostrea virginica TaxID=6565 RepID=UPI000BB005D2
1	51045601	109581_7
1	51137032	51142937	3e-168		C1q domain-containing protein DC17 (Fragment) n=3 Tax=Archivesica packardana TaxID=1299447 RepID=A0A4P8NI35_9BIVA
1	51140652	109537_3
1	51154477	109527_35
1	51214875	51224498	3e-124		Protein kinase domain-containing protein, cytoplasmic n=2 Tax=Pectinidae TaxID=6566 RepID=A0A210PGT6_MIZYE
1	51231103	51272896	2e-132		F-box/WD repeat-containing protein 7 n=2 Tax=Pectinidae TaxID=6566 RepID=A0A210PGM0_MIZYE
1	51331641	299122_35
1	51355084	299126_18
1	51356722	51392031	4e-48		zinc finger FYVE domain-containing protein 1 n=2 Tax=Crassostrea TaxID=6564 RepID=UPI00148A8AD1
1	51414462	51463832	2e-48		pleckstrin homology domain-containing family D member 1 isoform X1 n=5 Tax=Crassostrea gigas TaxID=29159 RepID=UPI00148A40C5
1	51465435	51471250	2e-25		tripartite motif-containing protein 2-like n=1 Tax=Crassostrea virginica TaxID=6565 RepID=UPI000BB0A45A
1	51474062	299162_33
1	51575257	51588763	0		lamin-B receptor-like n=1 Tax=Crassostrea virginica TaxID=6565 RepID=UPI000BAEA62C
1	51590472	299215_4
1	51601013	299221_2
1	51655320	299232_15
1	51671673	51672826	5e-16		THAP-type domain-containing protein n=2 Tax=Fundulus heteroclitus TaxID=8078 RepID=A0A3Q2QEP7_FUNHE
1	51698070	51723988	1e-67		F-box/LRR-repeat protein 14 n=1 Tax=Mizuhopecten yessoensis TaxID=6573 RepID=A0A210QC40_MIZYE
1	51728154	51738167	3e-58		2-aminoethylphosphonate--pyruvate transaminase-like n=1 Tax=Pecten maximus TaxID=6579 RepID=UPI0014588D65
1	51740398	51750529	4e-152		Proteasome subunit alpha type n=4 Tax=Pteriomorphia TaxID=6545 RepID=K1R008_CRAGI
1	51845638	51849798	0		STAS domain-containing protein (Fragment) n=1 Tax=Lottia gigantea TaxID=225164 RepID=V4AE01_LOTGI
1	51859477	51887262	3e-148		protein dispatched homolog 1-like n=1 Tax=Crassostrea virginica TaxID=6565 RepID=UPI000BAF29D2
1	51890185	299358_16
1	51924686	51955776	0		Reticulon-like protein n=1 Tax=Lottia gigantea TaxID=225164 RepID=V4B5R8_LOTGI
1	51956980	51974497	1e-77		3-hydroxyanthranilate 3,4-dioxygenase n=2 Tax=Crassostrea gigas TaxID=29159 RepID=K1PFM8_CRAGI
1	51975018	51980514	6e-80		transmembrane protein 229B-like n=2 Tax=Crassostrea virginica TaxID=6565 RepID=UPI000BB08649
1	52067611	52098266	1e-55		protein NRDE2 homolog n=1 Tax=Aplysia californica TaxID=6500 RepID=UPI000359BEA6
1	52104122	52129101	0		bromodomain adjacent to zinc finger domain protein 1A-like n=1 Tax=Crassostrea virginica TaxID=6565 RepID=UPI000BAE6ED1
1	52166164	52178501	1e-108		protein lin-52 homolog isoform X1 n=2 Tax=Lingula unguis TaxID=7574 RepID=A0A1S3HS93_LINUN
1	52189707	52199581	3e-107		TNFR-Cys domain-containing protein n=1 Tax=Pomacea canaliculata TaxID=400727 RepID=A0A2T7PK54_POMCA
1	52202688	52208067	5e-46		Sulfotransfer_1 domain-containing protein (Fragment) n=1 Tax=Capitella teleta TaxID=283909 RepID=R7T9E2_CAPTE
1	52210593	52236120	5e-43		WD repeat-containing protein 27 n=3 Tax=Pectinidae TaxID=6566 RepID=A0A210PP53_MIZYE
1	52212160	1_52212160	0.066	0.04546
1	52236886	185329_28
1	52243573	52277754	0		WD repeat-containing protein 43-like n=2 Tax=Lingula unguis TaxID=7574 RepID=A0A1S3HV08_LINUN
1	52292921	52298248	2e-158		protein lin-52 homolog isoform X1 n=2 Tax=Lingula unguis TaxID=7574 RepID=A0A1S3HS93_LINUN
1	52299348	52322055	0		probable serine/threonine-protein kinase yakA n=1 Tax=Pecten maximus TaxID=6579 RepID=UPI001458F10B
1	52331992	185357_16
1	52442215	185417_15
1	52541156	185463_11
1	52637086	185473_26
1	52647279	52657916	3e-35		ATP-dependent Clp protease ATP-binding subunit clpX-like, mitochondrial n=1 Tax=Ctenocephalides felis TaxID=7515 RepID=UPI000E6E3DC6
1	52653265	185479_29
1	52661405	52667718	1e-82		Sulfotransfer_1 domain-containing protein (Fragment) n=1 Tax=Capitella teleta TaxID=283909 RepID=R7T9E2_CAPTE
1	52672642	185484_20
1	52674475	52679098	7e-84		Glutathione peroxidase n=1 Tax=Ruditapes philippinarum TaxID=129788 RepID=A0A2R4RN88_RUDPH
1	52690248	52711505	2e-22		Ankyrin repeat and EF-hand domain-containing protein 1 n=6 Tax=Pectinidae TaxID=6566 RepID=A0A210QF97_MIZYE
1	52691777	185496_10
1	52703963	185502_6
1	52846367	52846777	0		reverse transcriptase family protein n=1 Tax=Bathymodiolus brooksi thiotrophic gill symbiont TaxID=1052209 RepID=UPI00111773E8
1	52849765	52874139	0		hemicentin-1 isoform X1 n=1 Tax=Amyelois transitella TaxID=680683 RepID=UPI00067AB710
1	52899055	185524_28
1	52933985	185545_26
1	52947091	52967589	6e-141		ABC1 domain-containing protein n=1 Tax=Elysia chlorotica TaxID=188477 RepID=A0A433T9K0_ELYCH
1	52984076	53036760	7e-69		hypoxia-inducible factor 1-alpha-like isoform X1 n=2 Tax=Pecten maximus TaxID=6579 RepID=UPI0014587E91
1	53119542	53119772	2e-41		Exodeoxyribonuclease III n=2 Tax=Bathymodiolus brooksi thiotrophic gill symbiont TaxID=1052209 RepID=A0A482YVF6_9BACT
1	53173917	313674_24
1	53253839	53264617	3e-26		multiple epidermal growth factor-like domains protein 10 n=1 Tax=Crassostrea gigas TaxID=29159 RepID=UPI00148A93A8
1	53323514	261232_7
1	53496215	261256_3
1	53656955	53664338	4e-25		LOW QUALITY PROTEIN: receptor-type tyrosine-protein phosphatase T-like n=1 Tax=Cyprinus carpio TaxID=7962 RepID=UPI0008FA3939
1	53694049	53696714	0		putative nuclease HARBI1 n=1 Tax=Crassostrea gigas TaxID=29159 RepID=UPI0009752326
1	53700788	314217_27
1	53752256	53755182	5e-66		Protein-tyrosine-phosphatase n=3 Tax=Amphimedon queenslandica TaxID=400682 RepID=A0A1X7U9D0_AMPQE
1	53797489	53819074	0		myotubularin-related protein 9-like n=1 Tax=Aplysia californica TaxID=6500 RepID=UPI00065B70ED
1	53877391	53881945	0		multiple epidermal growth factor-like domains protein 10 isoform X1 n=12 Tax=Pomacea canaliculata TaxID=400727 RepID=UPI000D73AABA
1	53878742	128333_29
1	53907990	128306_16
1	53920329	128300_19
1	54013897	54039983	1e-65		Leucine-rich repeat-containing protein 8A n=2 Tax=Pectinidae TaxID=6566 RepID=A0A210PQ28_MIZYE
1	54045710	54097793	7e-103		protein dispatched homolog 1-like n=1 Tax=Crassostrea virginica TaxID=6565 RepID=UPI000BAF29D2
1	54132662	54149174	4e-152		15-oxoprostaglandin 13-reductase n=2 Tax=Lingula unguis TaxID=7574 RepID=A0A1S3HU86_LINUN
1	54153714	54170202	0		Galectin n=1 Tax=Sinonovacula constricta TaxID=98310 RepID=A0A3R5VPR7_SINCO
1	54161661	128205_29
1	54170635	54194706	2e-158		WD repeat-containing protein 81 n=5 Tax=Mizuhopecten yessoensis TaxID=6573 RepID=A0A210PM91_MIZYE
1	54232150	54254118	4e-108		Protein phosphatase 1B n=1 Tax=Crassostrea gigas TaxID=29159 RepID=K1QL55_CRAGI
1	54255096	128160_10
1	54269853	54287017	5e-95		DUF862 domain-containing protein (Fragment) n=1 Tax=Elysia chlorotica TaxID=188477 RepID=A0A3S1BLJ9_ELYCH
1	54320542	54325914	0		E3 ubiquitin-protein ligase TRIM33 n=1 Tax=Mizuhopecten yessoensis TaxID=6573 RepID=A0A210Q629_MIZYE
1	54344744	54369937	5e-26		Protein toll n=3 Tax=Crassostrea gigas TaxID=29159 RepID=K1QRT1_CRAGI
1	54580166	54581108	3e-11		Ribosomal protein S6 kinase delta-1 n=5 Tax=Crassostrea gigas TaxID=29159 RepID=K1RBC5_CRAGI
1	54581311	54582946	6e-33		Ribosomal protein S6 kinase delta-1 n=2 Tax=Mizuhopecten yessoensis TaxID=6573 RepID=A0A210Q458_MIZYE
1	54588551	54604382	6e-128		ADP-ribosylation factor-like protein 2 n=4 Tax=Pteriomorphia TaxID=6545 RepID=K1RUY4_CRAGI
1	54620615	54669915	1e-92		Transcriptional adapter n=3 Tax=Crassostrea TaxID=6564 RepID=K1QUD9_CRAGI
1	54675202	54684806	1e-96		DUF4200 domain-containing protein n=1 Tax=Pomacea canaliculata TaxID=400727 RepID=A0A2T7PFU7_POMCA
1	54685528	54712585	4e-151		radial spoke head protein 4 homolog A-like isoform X1 n=4 Tax=Asteroidea TaxID=7588 RepID=UPI0014551553
1	54934609	54951357	1e-94		L-2-hydroxyglutarate dehydrogenase, mitochondrial n=2 Tax=Crassostrea gigas TaxID=29159 RepID=K1R224_CRAGI
1	54955178	54975383	0		cysteine sulfinic acid decarboxylase-like isoform X1 n=2 Tax=Mizuhopecten yessoensis TaxID=6573 RepID=UPI000B45D674
1	55001264	127822_1
1	55004213	127820_11
1	55030840	55050062	3e-08		Kelch-like protein 13 n=2 Tax=Pectinidae TaxID=6566 RepID=A0A210PPF0_MIZYE
1	55050401	55084112	0		kinetochore scaffold 1-like n=1 Tax=Actinia tenebrosa TaxID=6105 RepID=UPI0012B65B92
1	55094063	127786_10
1	55134420	55175171	2e-57		serine palmitoyltransferase 2-like n=1 Tax=Aplysia californica TaxID=6500 RepID=UPI00065BA0B3
1	55175471	55253735	0		Aminotran_1_2 domain-containing protein n=1 Tax=Elysia chlorotica TaxID=188477 RepID=A0A3S1A1V8_ELYCH
1	55257693	55276599	0		LOW QUALITY PROTEIN: endoribonuclease Dicer-like n=1 Tax=Pecten maximus TaxID=6579 RepID=UPI0014590098
1	55279617	55282768	4e-116		DICER n=1 Tax=Mytilus galloprovincialis TaxID=29158 RepID=A0A140H129_MYTGA
1	55298152	55329714	3e-55		N-alpha-acetyltransferase 30-like n=1 Tax=Crassostrea virginica TaxID=6565 RepID=UPI000BAF9588
1	55352797	55430373	1e-48		MAGUK p55 subfamily member 5-like isoform X1 n=3 Tax=Pectinidae TaxID=6566 RepID=UPI001458FD5C
1	55358002	127692_24
1	55433024	55450427	0		Syntaxin-5 n=2 Tax=Pectinidae TaxID=6566 RepID=A0A210PW01_MIZYE
1	55450752	127652_4
1	55547304	55589485	4e-58		Dysferlin-interacting protein 1 n=3 Tax=Crassostrea TaxID=6564 RepID=K1PQ73_CRAGI
1	55623849	69284_25
1	55654484	273541_20
1	55668637	273535_7
1	55684816	273522_27
1	55699730	273505_9
1	55716661	273494_28
1	55800295	225006_19
1	55803014	55843252	2e-126		Vacuolar protein sorting-associated protein 54 n=3 Tax=Pectinidae TaxID=6566 RepID=A0A210PHC0_MIZYE
1	55856828	55873941	4e-18		Egl nine-like protein 1 n=3 Tax=Crassostrea gigas TaxID=29159 RepID=K1QIC1_CRAGI
1	55864031	224984_28
1	55884432	55889034	4e-124		Beta-N-acetylhexosaminidase n=1 Tax=Crassostrea gigas TaxID=29159 RepID=K1QTN0_CRAGI
1	55899885	55932482	3e-55		PH domain-containing protein n=3 Tax=Crassostrea gigas TaxID=29159 RepID=K1QZW8_CRAGI
1	55982107	55994191	0		Hemagglutinin/amebocyte aggregation factor n=4 Tax=Crassostrea gigas TaxID=29159 RepID=K1QT99_CRAGI
1	56024974	56067555	9e-175		Cytoplasmic dynein 2 light intermediate chain 1 n=1 Tax=Lottia gigantea TaxID=225164 RepID=V3ZG18_LOTGI
1	56055791	224915_8
1	56068775	56089464	2e-79		ABC transporter F family member 4-like isoform X1 n=4 Tax=Mizuhopecten yessoensis TaxID=6573 RepID=UPI000B457400
1	56091725	56105113	0		JNK1/MAPK8-associated membrane protein-like n=1 Tax=Anadara broughtonii TaxID=148819 RepID=A0A2P1E2K5_ANABR
1	56105173	56127780	9e-103		transmembrane protein 62-like n=1 Tax=Pecten maximus TaxID=6579 RepID=UPI0014584715
1	56130182	56213491	2e-30		Signal-induced proliferation-associated 1-like protein 2 n=5 Tax=Pectinidae TaxID=6566 RepID=A0A210PPX7_MIZYE
1	56213964	56224152	2e-135		CDK-activating kinase assembly factor MAT1-like n=1 Tax=Pecten maximus TaxID=6579 RepID=UPI0014584742
1	56383020	224743_25
1	56483593	56496742	0		seipin-like n=1 Tax=Pecten maximus TaxID=6579 RepID=UPI0014582B8E
1	56498897	56527728	4e-18		HHIP-like protein 1 n=3 Tax=Crassostrea gigas TaxID=29159 RepID=K1RK62_CRAGI
1	56571681	56585963	3e-143		Peroxisome assembly factor 2 n=2 Tax=Pectinidae TaxID=6566 RepID=A0A210PPN8_MIZYE
1	56580817	189627_31
1	56593968	189622_26
1	56594029	56623832	8e-158		N-alpha-acetyltransferase 40 n=1 Tax=Lingula unguis TaxID=7574 RepID=A0A1S3J8M6_LINUN
1	56772330	56780930	1e-177		Leucine-rich repeat protein 1 n=2 Tax=Pectinidae TaxID=6566 RepID=A0A210PQC1_MIZYE
1	56773351	189539_18
1	56796102	189531_28
1	56799756	56824368	0		serine/threonine/tyrosine-interacting protein A-like n=1 Tax=Centruroides sculpturatus TaxID=218467 RepID=UPI000C6D8BCD
1	56800615	189524_27
1	56824474	56827982	0		UPF0669 protein v1g209471-like n=1 Tax=Crassostrea virginica TaxID=6565 RepID=UPI000BAF880E
1	56829115	56839832	8e-14		TATA-box-binding protein-like n=1 Tax=Crassostrea gigas TaxID=29159 RepID=UPI0005C3A19D
1	56839965	56850514	0		MAP3K12-binding inhibitory protein 1 n=1 Tax=Mizuhopecten yessoensis TaxID=6573 RepID=A0A210PFA1_MIZYE
1	56852695	56874812	0		Sulfide:quinone oxidoreductase n=1 Tax=Sinonovacula constricta TaxID=98310 RepID=A0A6B9CM12_SINCO
1	56881962	56886304	0		RBR-type E3 ubiquitin transferase n=3 Tax=Crassostrea gigas TaxID=29159 RepID=K1Q5J3_CRAGI
1	56943456	56988821	0		Mitochondrial import receptor subunit TOM20 n=2 Tax=Eukaryota TaxID=2759 RepID=A0A1D1ZAI4_9ARAE
1	56951111	189442_0
1	56962481	189439_33
1	56985558	189424_29
1	56995421	57132401	0		A1pp-domain-containing protein n=1 Tax=Piromyces finnis TaxID=1754191 RepID=A0A1Y1VIK5_9FUNG
1	57023632	189416_17
1	57042867	189415_35
1	57048551	189410_32
1	57059950	189404_15
1	57091169	189395_17
1	57121521	189391_3
1	57154352	57182048	1e-07		Tau-tubulin kinase 1 n=3 Tax=Pectinidae TaxID=6566 RepID=A0A210QVG5_MIZYE
1	57193509	189355_33
1	57195047	189354_0
1	57336121	57341286	9e-69		nesprin-1-like isoform X1 n=4 Tax=Pectinidae TaxID=6566 RepID=UPI000B45C5EC
1	57338942	189280_18
1	57403575	189251_7
1	57414147	57436862	0		nesprin-1-like isoform X8 n=1 Tax=Crassostrea virginica TaxID=6565 RepID=UPI000BB08427
1	57419800	189245_3
1	57424320	189239_19
1	57437702	57488753	0		Nesprin-1 n=1 Tax=Mizuhopecten yessoensis TaxID=6573 RepID=A0A210QXB7_MIZYE
1	57446484	189223_15
1	57446943	189222_11
1	57507695	57511919	6e-115		Nesprin-1 n=1 Tax=Mizuhopecten yessoensis TaxID=6573 RepID=A0A210QXB7_MIZYE
1	57533466	189179_32
1	57565622	57620674	0		nesprin-1-like isoform X1 n=4 Tax=Pectinidae TaxID=6566 RepID=UPI000B45C5EC
1	57606500	189135_20
1	57630330	57638732	3e-158		Coiled-coil domain-containing protein 85C n=1 Tax=Crassostrea gigas TaxID=29159 RepID=K1R8E7_CRAGI
1	57637914	189108_0
1	57739510	250286_3
1	57781589	57792489	1e-45		Zinc finger and BTB domain-containing protein 14 n=3 Tax=Pectinidae TaxID=6566 RepID=A0A210QNP7_MIZYE
1	57803644	58115834	2e-174		EH domain-binding protein 1 isoform X1 n=10 Tax=Crassostrea gigas TaxID=29159 RepID=UPI00148A5154
1	57828443	250310_30
1	57902742	250345_4
1	57977526	250384_25
1	58034858	281327_30
1	58062908	281335_24
1	58116453	58125190	7e-22		BTB/POZ domain-containing protein 17 n=2 Tax=Crassostrea gigas TaxID=29159 RepID=K1R817_CRAGI
1	58135193	58135754	0		Exodeoxyribonuclease III n=2 Tax=Bathymodiolus brooksi thiotrophic gill symbiont TaxID=1052209 RepID=A0A482YPZ5_9BACT
1	58212875	281393_1
1	58219927	58232189	0		centriole, cilia and spindle-associated protein-like n=1 Tax=Pecten maximus TaxID=6579 RepID=UPI0014583DBE
1	58233627	58246998	2e-174		Adenylyltransferase and sulfurtransferase MOCS3 homolog n=1 Tax=Mizuhopecten yessoensis TaxID=6573 RepID=A0A210PXI6_MIZYE
1	58251186	281411_25
1	58394240	281428_6
1	58481179	58667018	1e-44		Complement component C3 n=1 Tax=Ruditapes decussatus TaxID=104385 RepID=C0JPJ2_9BIVA
1	58552061	281446_35
1	58552912	281447_17
1	58557157	281449_19
1	58572203	281451_10
1	58667633	281463_2
1	58667718	281464_2
1	58687829	281469_7
1	58699848	281475_9
1	58699977	281476_19
1	58702970	281477_34
1	58703165	281478_11
1	58710452	281481_20
1	58763023	281497_1
1	58791760	281501_9
1	58919450	281514_2
1	59097428	294763_25
1	59117889	294768_17
1	59118051	294769_6
1	59130955	294772_16
1	59170035	294779_25
1	59221066	182363_17
1	59245404	182353_16
1	59245502	182352_6
1	59250068	59583556	0		Complement component C3 n=1 Tax=Ruditapes decussatus TaxID=104385 RepID=C0JPJ2_9BIVA
1	59274635	182341_19
1	59385527	182333_34
1	59394475	182332_18
1	59403322	182330_35
1	59502405	182309_29
1	59506576	182307_26
1	59581341	182293_7
1	59587687	182291_0
1	59600280	59677691	0		steroid 17-alpha-hydroxylase/17,20 lyase-like n=2 Tax=Pecten maximus TaxID=6579 RepID=UPI001457FAE6
1	59606844	182289_32
1	59665846	182281_27
1	59685891	182275_35
1	59747319	59779742	0		Adenylosuccinate synthetase n=2 Tax=Crassostrea gigas TaxID=29159 RepID=K1R984_CRAGI
1	59782339	59799862	3e-160		dihydrolipoyllysine-residue succinyltransferase component of 2-oxoglutarate dehydrogenase complex,mitochondrial-like n=1 Tax=Aplysia californica TaxID=6500 RepID=UPI00065C0F2D
1	59792761	182248_9
1	59822465	59903609	4e-90		Alpha-actinin, sarcomeric n=4 Tax=Crassostrea TaxID=6564 RepID=K1RH58_CRAGI
1	59824510	182242_2
1	59858328	182232_9
1	59935940	59969430	1e-139		Exocyst complex component 5 n=3 Tax=Crassostrea TaxID=6564 RepID=K1Q2T9_CRAGI
1	59979011	182175_5
1	60011253	60056776	6e-42		serrate RNA effector molecule homolog n=1 Tax=Pecten maximus TaxID=6579 RepID=UPI0014591873
1	60043193	182149_2
1	60058203	60069599	0		phosphatidylinositol N-acetylglucosaminyltransferase subunit H-like isoform X2 n=1 Tax=Aplysia californica TaxID=6500 RepID=UPI000359E1ED
1	60120003	60125702	1e-161		speedy protein A-like n=2 Tax=Pecten maximus TaxID=6579 RepID=UPI001458CE7D
1	60129688	60157487	2e-180		retinol dehydrogenase 14-like n=1 Tax=Aplysia californica TaxID=6500 RepID=UPI000359DDC5
1	60157780	60173960	3e-171		NAD-dependent protein deacetylase sirtuin-2-like isoform X1 n=2 Tax=Pecten maximus TaxID=6579 RepID=UPI0014586B1E
1	60215018	182098_18
1	60223842	182095_30
1	60232784	60252444	2e-82		Cystatin n=1 Tax=Argopecten irradians TaxID=31199 RepID=A0A2R3SJZ3_ARGIR
1	60234304	182089_25
1	60248908	182083_27
1	60266644	60274097	0		Sulfotransfer_1 domain-containing protein (Fragment) n=1 Tax=Capitella teleta TaxID=283909 RepID=R7T9E2_CAPTE
1	60277791	60310472	0		Alpha-1,4 glucan phosphorylase n=1 Tax=Diplodon chilensis TaxID=149536 RepID=A0A2P1H678_9BIVA
1	60323932	182056_11
1	60325674	182054_18
1	60340555	60359345	6e-43		Cleft lip and palate transmembrane protein 1-like n=2 Tax=Mizuhopecten yessoensis TaxID=6573 RepID=A0A210QRV1_MIZYE
1	60350123	182045_26
1	60458456	60466378	0		C-type lectin n=1 Tax=Ruditapes philippinarum TaxID=129788 RepID=C8CBL6_RUDPH
1	60473804	186510_16
1	60477819	186507_26
1	60492816	60495210	0		dynein light chain 1, cytoplasmic isoform X1 n=1 Tax=Sitophilus oryzae TaxID=7048 RepID=UPI00122FC7E5
1	60499139	60509816	2e-100		MOSC domain-containing protein n=1 Tax=Pomacea canaliculata TaxID=400727 RepID=A0A2T7NWL9_POMCA
1	60535109	186479_11
1	60556551	60563952	2e-96		zinc finger protein 862-like n=1 Tax=Crassostrea virginica TaxID=6565 RepID=UPI000BB01DB2
1	60558114	186467_27
1	60558123	186468_4
1	60559587	186464_5
1	60666948	60733329	0		Rap-GAP domain-containing protein n=1 Tax=Lottia gigantea TaxID=225164 RepID=V4BMK8_LOTGI
1	60747694	60813827	0		Ubiquitin carboxyl-terminal hydrolase 34 n=6 Tax=Mizuhopecten yessoensis TaxID=6573 RepID=A0A210PML0_MIZYE
1	60822031	60824608	6e-70		Ubiquitin carboxyl-terminal hydrolase 34 n=6 Tax=Mizuhopecten yessoensis TaxID=6573 RepID=A0A210PML0_MIZYE
1	60855910	60858504	0		Exodeoxyribonuclease III n=2 Tax=Bathymodiolus brooksi thiotrophic gill symbiont TaxID=1052209 RepID=A0A482YN63_9BACT
1	60865036	60869515	2e-141		Serine protease inhibitor dipetalogastin n=1 Tax=Orchesella cincta TaxID=48709 RepID=A0A1D2MIZ2_ORCCI
1	60898228	225340_19
1	61061663	225250_5
1	61094420	225236_4
1	61144818	225223_6
1	61169111	61187266	5e-27		LOW QUALITY PROTEIN: denticleless protein homolog n=1 Tax=Pecten maximus TaxID=6579 RepID=UPI00145823AA
1	61188569	61217913	0		Cell division control protein 42-like n=2 Tax=Pectinidae TaxID=6566 RepID=A0A210QIY9_MIZYE
1	61232730	61267188	1e-89		cdc42 homolog n=1 Tax=Lingula unguis TaxID=7574 RepID=A0A1S3IWC2_LINUN
1	61280842	61323742	0		Presenilin n=1 Tax=Mizuhopecten yessoensis TaxID=6573 RepID=A0A210QTX2_MIZYE
1	61361844	61420686	7e-133		xanthine dehydrogenase/oxidase-like isoform X1 n=4 Tax=Crassostrea virginica TaxID=6565 RepID=UPI000BAF34C2
1	61474263	225070_8
1	61541753	61627198	1e-112		Probable calcium-binding protein CML10 n=8 Tax=Oryza TaxID=4527 RepID=CML10_ORYSJ
1	61630388	61641981	1e-57		Calmodulin (Fragment) n=1 Tax=Frankliniella cephalica TaxID=407008 RepID=A0A481SX09_9NEOP
1	61646124	61655418	4e-154		Calmodulin (Fragment) n=1 Tax=Frankliniella cephalica TaxID=407008 RepID=A0A481SX09_9NEOP
1	61655877	78130_8
1	61669840	61690415	4e-51		Putative establishment of meiotic spindle orientation (Fragment) n=2 Tax=Nyssorhynchus TaxID=44543 RepID=T1EAD2_ANOAQ
1	61676238	78120_27
1	61688773	1_61688773	0.1051	0.013006
1	61721159	61736507	1e-14		Kal-1 n=2 Tax=Pristionchus pacificus TaxID=54126 RepID=H3EXT0_PRIPA
1	61739071	78091_11
1	61790683	78063_17
1	61984005	62028556	0		Dipeptidyl peptidase 3 n=1 Tax=Lottia gigantea TaxID=225164 RepID=V3ZM90_LOTGI
1	62064114	62083301	2.54e-06		NPC intracellular cholesterol transporter 2
1	62268373	62287988	2e-96		Leucine-rich repeat-containing protein 14 n=1 Tax=Crassostrea gigas TaxID=29159 RepID=K1S1P1_CRAGI
1	62281313	77832_7
1	62286292	77829_5
1	62288527	62300777	3e-48		RRM domain-containing protein n=2 Tax=Percomorphaceae TaxID=1489872 RepID=A0A3B4Z7G3_9TELE
1	62309242	62324539	2e-24		G2/mitotic-specific cyclin-B n=4 Tax=Crassostrea gigas TaxID=29159 RepID=K1PD78_CRAGI
1	62320643	77820_6
1	62327367	77817_3
1	62330297	62338982	1e-28		RRM domain-containing protein n=7 Tax=Apocrita TaxID=7400 RepID=A0A088A1R1_APIME
1	62343276	62380177	0		Crooked neck-like protein 1 n=3 Tax=Crassostrea TaxID=6564 RepID=K1QCP3_CRAGI
1	62444043	77783_30
1	62513500	77767_5
1	62546318	77757_24
1	62581021	77745_18
1	62609998	77734_0
1	62652752	62661939	4e-86		RING-type domain-containing protein n=3 Tax=Octopus TaxID=6643 RepID=A0A0L8FY40_OCTBM
1	62655851	245314_19
1	62661568	245318_6
1	62687586	62689494	7e-07		serine/threonine-protein kinase Nek9-like n=1 Tax=Crassostrea gigas TaxID=29159 RepID=UPI0009750E0A
1	62754035	62758014	2e-154		ATP-dependent RNA helicase DHX57 n=2 Tax=Mizuhopecten yessoensis TaxID=6573 RepID=A0A210PU63_MIZYE
1	62757818	245345_31
1	62800156	245377_29
1	62874132	245410_32
1	62886859	62902703	2e-86		zinc transporter 6-A-like n=4 Tax=Crassostrea TaxID=6564 RepID=UPI0009750927
1	62909965	245426_10
1	62988530	313534_3
1	63015609	313516_1
1	63036634	63053710	0		multiple epidermal growth factor-like domains protein 10 isoform X1 n=19 Tax=Crassostrea gigas TaxID=29159 RepID=UPI00148A8AA5
1	63155351	63165453	0		hypothetical protein n=1 Tax=Aphanizomenon sp. UHCC 0183 TaxID=2590028 RepID=UPI001445F14C
1	63191481	63216946	0		tip elongation aberrant protein 1-like n=1 Tax=Pecten maximus TaxID=6579 RepID=UPI001458E2D7
1	63243057	63261185	3e-90		kynurenine 3-monooxygenase-like n=1 Tax=Aplysia californica TaxID=6500 RepID=UPI00065B5E97
1	63247379	278536_17
1	63275394	143513_15
1	63315599	63350741	0		zinc finger CCCH domain-containing protein 14-like n=1 Tax=Mizuhopecten yessoensis TaxID=6573 RepID=UPI000B459449
1	63371447	63393417	5e-56		Mediator of RNA polymerase II transcription subunit 17 n=2 Tax=Octopus TaxID=6643 RepID=A0A0L8GZN5_OCTBM
1	63372679	274985_28
1	63385146	274987_8
1	63385174	274988_26
1	63419583	275003_2
1	63464782	275014_6
1	63467783	63473151	0		Polyamine oxidase 4 n=1 Tax=Mizuhopecten yessoensis TaxID=6573 RepID=A0A210Q7H9_MIZYE
1	63473950	63561592	0		Component of oligomeric Golgi complex 2 n=4 Tax=Pectinidae TaxID=6566 RepID=A0A210R646_MIZYE
1	63547715	247995_35
1	63570235	247998_25
1	63687653	248017_4
1	63696563	63727744	2e-84		E3 ubiquitin/ISG15 ligase TRIM25-like n=1 Tax=Crassostrea gigas TaxID=29159 RepID=UPI00148A6604
1	63720514	248026_26
1	63733444	63750332	6e-49		BUD13 homolog n=1 Tax=Pecten maximus TaxID=6579 RepID=UPI001457EB79
1	63751320	248046_11
1	63799804	248056_17
1	63836556	248065_6
1	63892209	63917017	4e-09		prolow-density lipoprotein receptor-related protein 1-like n=1 Tax=Pecten maximus TaxID=6579 RepID=UPI001458D3E2
1	63892517	248083_2
1	63981914	64024496	0		Peroxidase n=1 Tax=Hadrurus spadix TaxID=141984 RepID=A0A1W7R9Z5_9SCOR
1	64150779	265673_20
1	64163225	265669_18
1	64192454	64192813	1e-164		Integrase catalytic domain-containing protein n=1 Tax=Scylla olivacea TaxID=85551 RepID=A0A0P4WIE8_9EUCA
1	64220428	64237814	7e-18		mucin-5AC-like n=1 Tax=Mizuhopecten yessoensis TaxID=6573 RepID=UPI000B45B53D
1	64315807	265585_28
2	24370	169762_2
2	161736	169692_20
2	183130	169676_25
2	187939	281485	1e-106		Neuronal calcium sensor 2 n=2 Tax=Pectinidae TaxID=6566 RepID=A0A210R5U1_MIZYE
2	284670	300368	6e-107		F-box only protein 32 n=2 Tax=Pectinidae TaxID=6566 RepID=A0A210QF04_MIZYE
2	394136	415183	4e-102		Pre-mRNA-splicing factor 38 n=2 Tax=Pectinidae TaxID=6566 RepID=A0A210Q089_MIZYE
2	419030	422171	4e-20		Complement C1q-like protein 2 n=1 Tax=Ruditapes philippinarum TaxID=129788 RepID=A0A0U3AA90_RUDPH
2	435426	440357	6e-71		PseudoU_synth_2 domain-containing protein n=2 Tax=Octopus TaxID=6643 RepID=A0A0L8IDN0_OCTBM
2	487080	169519_1
2	652237	169447_8
2	656630	669409	3e-147		coiled-coil domain-containing protein 130 homolog n=1 Tax=Pecten maximus TaxID=6579 RepID=UPI00145823A9
2	659419	169444_15
2	718525	169426_9
2	767803	814294	9e-177		Annexin n=3 Tax=Pomacea canaliculata TaxID=400727 RepID=A0A2T7NCJ9_POMCA
2	838248	839539	0		Arylsulfatase B n=2 Tax=Mizuhopecten yessoensis TaxID=6573 RepID=A0A210QUB6_MIZYE
2	854006	857912	0		arylsulfatase B-like n=2 Tax=Crassostrea virginica TaxID=6565 RepID=UPI000BB094B1
2	961218	1042443	8e-85		tetraspanin-18-like isoform X4 n=2 Tax=Pecten maximus TaxID=6579 RepID=UPI0014588052
2	985176	169319_0
2	1067367	1116920	3e-76		Tetraspanin n=4 Tax=Pectinidae TaxID=6566 RepID=A0A210PUN1_MIZYE
2	1183612	169216_2
2	1230109	169202_10
2	1247318	1248441	3e-32		Reverse transcriptase domain-containing protein n=1 Tax=invertebrate metagenome TaxID=1711999 RepID=A0A2H9T4I8_9ZZZZ
2	1255247	169199_8
2	1323772	85131_20
2	1344159	1358257	3e-71		SAM domain-containing protein n=1 Tax=Lottia gigantea TaxID=225164 RepID=V4B2Q0_LOTGI
2	1360823	85144_33
2	1364454	1392366	0		Inositol phosphoceramide mannosyltransferase 3 n=1 Tax=Mizuhopecten yessoensis TaxID=6573 RepID=A0A210QM63_MIZYE
2	1366753	85147_29
2	1370784	85150_24
2	1375062	85153_34
2	1440836	1459400	5e-34		ceramide kinase-like n=1 Tax=Pecten maximus TaxID=6579 RepID=UPI0014581C85
2	1462254	85194_27
2	1474295	1484916	0		LOW QUALITY PROTEIN: alkaline phosphatase-like n=1 Tax=Crassostrea virginica TaxID=6565 RepID=UPI000BAF795B
2	1506873	1517377	0		Peptidylprolyl isomerase n=2 Tax=Harpellales TaxID=61421 RepID=A0A2U1J4U8_9FUNG
2	1512288	85214_26	0.0841408	0.0051221
2	1520280	1644583	0		WD repeat-containing protein 78 n=9 Tax=Pectinidae TaxID=6566 RepID=A0A210QJC3_MIZYE
2	1650017	1664367	3e-146		fibulin-1-like n=1 Tax=Lingula unguis TaxID=7574 RepID=A0A1S3JWA6_LINUN
2	1690542	85285_26
2	1696140	85288_32
2	1706419	1725752	3e-162		LOW QUALITY PROTEIN: uncharacterized protein LOC117341442 n=1 Tax=Pecten maximus TaxID=6579 RepID=UPI00145851BE
2	1726046	85298_2
2	1747741	85304_16
2	1792167	85322_25
2	1834568	1834978	3e-21		Endo/exonuclease/phosphatase domain-containing protein n=1 Tax=Lottia gigantea TaxID=225164 RepID=V4BDH6_LOTGI
2	1883564	1892684	0		fibulin-1-like n=1 Tax=Lingula unguis TaxID=7574 RepID=A0A1S3JWA6_LINUN
2	1931034	85375_20
2	1987124	2019745	0		Ornithine decarboxylase 1 n=2 Tax=Pectinidae TaxID=6566 RepID=A0A210PQ12_MIZYE
2	2053484	2199671	0		Non-specific serine/threonine protein kinase n=2 Tax=Mizuhopecten yessoensis TaxID=6573 RepID=A0A210QBI0_MIZYE
2	2176492	85467_16
2	2213332	85487_32
2	2214323	2228097	4e-118		Vacuolar protein sorting-associated protein 28 homolog n=1 Tax=Pomacea canaliculata TaxID=400727 RepID=A0A2T7NQC1_POMCA
2	2229688	2309363	0		Reverse transcriptase domain-containing protein n=2 Tax=Bathymodiolus brooksi thiotrophic gill symbiont TaxID=1052209 RepID=A0A482YR30_9BACT
2	2256415	85496_10
2	2349410	2352281	3e-96		profilin-2-like isoform X1 n=1 Tax=Pecten maximus TaxID=6579 RepID=UPI0014590840
2	2358943	2390040	0		Serine/threonine-protein kinase NIM1 n=4 Tax=Crassostrea TaxID=6564 RepID=K1PJE4_CRAGI
2	2379944	85529_24
2	2410667	85545_18
2	2414273	2435238	0		Proteasome subunit beta n=2 Tax=Crassostrea TaxID=6564 RepID=K1PDC6_CRAGI
2	2424591	85551_8
2	2429794	85553_5
2	2436332	2451007	0		protein zyg-11 homolog B n=3 Tax=Crassostrea TaxID=6564 RepID=UPI00148A5610
2	2453342	2466744	6e-114		KH domain-containing, RNA-binding, signal transduction-associated protein 1-like n=1 Tax=Pomacea canaliculata TaxID=400727 RepID=UPI000D73FE50
2	2466911	2480506	1e-169		putative hydroxypyruvate isomerase n=1 Tax=Pomacea canaliculata TaxID=400727 RepID=UPI000D73DE07
2	2482885	2514356	0		delta(24)-sterol reductase-like isoform X1 n=3 Tax=Crassostrea virginica TaxID=6565 RepID=UPI000BB0764D
2	2515425	2536755	0		RING-type E3 ubiquitin transferase n=4 Tax=Crassostrea TaxID=6564 RepID=K1RAS4_CRAGI
2	2601844	85603_5
2	2683139	85635_3
2	2743007	85653_32
2	2764642	2818317	3e-61		Lysine histidine transporter 1 n=3 Tax=Crassostrea gigas TaxID=29159 RepID=K1RT88_CRAGI
2	2911913	2913031	1e-31		Reverse transcriptase domain-containing protein n=2 Tax=Bacteria TaxID=2 RepID=A0A482YTI8_9BACT
2	2928205	261405_33
2	2930354	261407_4
2	2950231	261415_3
2	2950558	261416_24
2	2960719	2975409	3e-61		ATP synthase mitochondrial F1 complex assembly factor 1 n=1 Tax=Crassostrea gigas TaxID=29159 RepID=UPI0005C379D5
2	2962907	261422_18
2	2968928	261425_24
2	3059797	261471_1
2	3064801	3185403	5e-18		collagen alpha-1(I) chain isoform X1 n=4 Tax=Lingula unguis TaxID=7574 RepID=A0A1S3IXT3_LINUN
2	3142836	261525_2
2	3151502	261530_35
2	3165661	261541_16
2	3186617	3255747	5e-18		collagen alpha-1(IX) chain-like isoform X1 n=3 Tax=Pecten maximus TaxID=6579 RepID=UPI0014580641
2	3259404	3281942	2e-114		Steroid 17-alpha-hydroxylase/17,20 lyase n=2 Tax=Mizuhopecten yessoensis TaxID=6573 RepID=A0A210QDD1_MIZYE
2	3285791	3320101	0		Serine/threonine-protein kinase MAK n=4 Tax=Crassostrea TaxID=6564 RepID=K1QV86_CRAGI
2	3299867	261621_34
2	3331580	290953_20
2	3358984	3381336	0		Amidase n=1 Tax=Mizuhopecten yessoensis TaxID=6573 RepID=A0A210PI07_MIZYE
2	3381878	3419916	0		LOW QUALITY PROTEIN: DNA (cytosine-5)-methyltransferase PliMCI-like n=1 Tax=Pecten maximus TaxID=6579 RepID=UPI001458131A
2	3396547	290925_35
2	3423811	3560438	0		Sodium bicarbonate transporter-like protein 11 n=12 Tax=Crassostrea gigas TaxID=29159 RepID=K1RBJ4_CRAGI
2	3627645	3660419	2e-17		Elongation of very long chain fatty acids protein n=1 Tax=Capitella teleta TaxID=283909 RepID=X1ZD62_CAPTE
2	3654314	201620_26
2	3699504	3712043	0		cGMP-dependent protein kinase, isozyme 1-like n=1 Tax=Megachile rotundata TaxID=143995 RepID=UPI000258D96A
2	3766350	201578_25
2	3812938	201561_26
2	3857411	3884110	5e-23		AAA domain-containing protein n=2 Tax=Pectinidae TaxID=6566 RepID=A0A210QJ82_MIZYE
2	3864441	201533_7
2	3965343	201462_30
2	3983528	201447_19
2	4065513	201396_0
2	4108933	4121182	1e-135		mediator of DNA damage checkpoint protein 1-like n=1 Tax=Crassostrea gigas TaxID=29159 RepID=UPI0005C3660A
2	4141150	4141530	0		LOW QUALITY PROTEIN: fat-like cadherin-related tumor suppressor homolog n=1 Tax=Exaiptasia pallida TaxID=1720309 RepID=UPI000A2A7BB7
2	4203589	4211818	0		Malignant fibrous histiocytoma-amplified sequence 1-like n=1 Tax=Mizuhopecten yessoensis TaxID=6573 RepID=A0A210PPZ1_MIZYE
2	4270255	201316_34
2	4283618	201314_32
2	4466115	4493816	0		DNA repair endonuclease XPF n=2 Tax=Pectinidae TaxID=6566 RepID=A0A210R1E3_MIZYE
2	4528806	201146_34
2	4546558	201139_5
2	4571004	4626714	7e-147		Pancreatic lipase-related protein 2 n=2 Tax=Crassostrea gigas TaxID=29159 RepID=K1PH19_CRAGI
2	4657867	4684479	0		choline transporter-like protein 1 n=2 Tax=Crassostrea virginica TaxID=6565 RepID=UPI000BAECE19
2	4671817	163544_17
2	4684639	4726316	0		Tudor domain-containing protein 1 n=4 Tax=Mizuhopecten yessoensis TaxID=6573 RepID=A0A210QTI1_MIZYE
2	4699433	163556_10
2	4757069	4793269	1e-75		Lethal(3)malignant brain tumor-like protein 1 n=2 Tax=Mizuhopecten yessoensis TaxID=6573 RepID=A0A210QAH4_MIZYE
2	4799794	163596_27
2	4826937	4838182	0		myelin transcription factor 1 isoform X2 n=2 Tax=Urocitellus parryii TaxID=9999 RepID=UPI000E55E891
2	4841037	4873350	0		trafficking protein particle complex subunit 12-like n=1 Tax=Pecten maximus TaxID=6579 RepID=UPI0014587FF3
2	4976551	4993962	0		PDZ domain-containing protein n=2 Tax=Pomacea canaliculata TaxID=400727 RepID=A0A2T7NPH3_POMCA
2	5043035	5074460	4e-67		Solute carrier organic anion transporter family member n=5 Tax=Crassostrea gigas TaxID=29159 RepID=K1QB38_CRAGI
2	5074655	5110329	7e-142		Elongation of very long chain fatty acids protein n=1 Tax=Sinonovacula constricta TaxID=98310 RepID=A0A4Y5JSY5_SINCO
2	5116111	163762_26
2	5117086	5132444	7e-105		LOW QUALITY PROTEIN: uncharacterized protein LOC117324964 n=1 Tax=Pecten maximus TaxID=6579 RepID=UPI00145822BD
2	5134207	5151429	1e-141		BSD domain-containing protein 1-like n=1 Tax=Crassostrea virginica TaxID=6565 RepID=UPI000BAEC033
2	5165672	163777_33
2	5165780	163778_3	0.0816777	0.00716434
2	5178755	163802_17
2	5330079	5335415	0		BZIP domain-containing protein (Fragment) n=1 Tax=Mytilus galloprovincialis TaxID=29158 RepID=A0A409V751_MYTGA
2	5356542	5380315	0		BHLH domain-containing protein (Fragment) n=1 Tax=Lottia gigantea TaxID=225164 RepID=V4A932_LOTGI
2	5389416	5498215	1e-36		regulator of telomere elongation helicase 1-like n=2 Tax=Crassostrea gigas TaxID=29159 RepID=UPI00148A716F
2	5462275	163960_7
2	5490213	163973_1
2	5534113	5573445	1e-85		E3 ubiquitin-protein ligase TRIM56 n=2 Tax=Pectinidae TaxID=6566 RepID=A0A210PH75_MIZYE
2	5575867	5583520	4e-156		cholesterol 25-hydroxylase-like n=1 Tax=Crassostrea gigas TaxID=29159 RepID=UPI00148ABB1D
2	5593451	5637698	4e-156		Glucose dehydrogenase [acceptor] n=1 Tax=Mizuhopecten yessoensis TaxID=6573 RepID=A0A210PMB7_MIZYE
2	5618347	164010_4
2	5800250	164109_19
2	5818901	5835800	4e-45		peptidase inhibitor R3HDML-like n=1 Tax=Pecten maximus TaxID=6579 RepID=UPI001458E900
2	5820446	164119_0
2	5843762	164132_7
2	5885451	164167_35
2	5918328	5918691	1e-07		Reverse transcriptase domain-containing protein n=1 Tax=invertebrate metagenome TaxID=1711999 RepID=A0A2H9T4I8_9ZZZZ
2	6016811	293889_35
2	6026539	293882_10
2	6041690	293876_5
2	6070857	293852_1
2	6179430	6196669	2e-21		sulfotransferase family cytosolic 1B member 1-like isoform X1 n=2 Tax=Pecten maximus TaxID=6579 RepID=UPI00145810F4
2	6209637	129538_19
2	6216796	129531_8
2	6231614	129528_34
2	6298680	6308038	5e-169		E3 ubiquitin-protein ligase RNF170 n=1 Tax=Crassostrea gigas TaxID=29159 RepID=K1QDR4_CRAGI
2	6342246	6357097	5e-169		Nucleoredoxin-like protein 2 n=2 Tax=Mizuhopecten yessoensis TaxID=6573 RepID=A0A210R0A9_MIZYE
2	6354702	129465_35
2	6382998	6403130	0		non-specific lipid-transfer protein-like n=1 Tax=Priapulus caudatus TaxID=37621 RepID=UPI000719AD4E
2	6383856	2_6383856	0.116	0.016744
2	6395011	129447_34
2	6420149	129439_16
2	6442367	6457633	0		Nipped-B protein n=1 Tax=Biomphalaria glabrata TaxID=6526 RepID=A0A2C9MAH1_BIOGL
2	6536534	6537836	0		Putative deddh 3'-5' exonuclease domain of rna exonuclease 1 (Fragment) n=4 Tax=Ixodes ricinus TaxID=34613 RepID=A0A6B0VFY4_IXORI
2	6558749	6568758	2e-53		Exonuclease domain-containing protein (Fragment) n=1 Tax=Lottia gigantea TaxID=225164 RepID=V4AB80_LOTGI
2	6603504	6605908	0		RNA exonuclease 1 homolog isoform X1 n=3 Tax=Crassostrea virginica TaxID=6565 RepID=UPI000BB0B181
2	6613023	6664384	0		terminal uridylyltransferase 7-like isoform X1 n=2 Tax=Pecten maximus TaxID=6579 RepID=UPI001458F7D7
2	6655781	129374_20
2	6666524	6791578	3e-102		DUF1394 domain-containing protein n=1 Tax=Lottia gigantea TaxID=225164 RepID=V3ZV52_LOTGI
2	6767374	172154_11
2	6811987	172171_6
2	6929934	7081667	1e-125		COP9 signalosome complex subunit 5 n=3 Tax=Pteriomorphia TaxID=6545 RepID=UPI000B458BDD
2	6947271	172239_26
2	6950007	172241_32
2	7009099	172261_19
2	7014261	172264_3
2	7042732	172277_20
2	7085830	7109213	0		Palmitoyl-protein hydrolase 1 n=1 Tax=Biomphalaria glabrata TaxID=6526 RepID=A0A2C9JHT0_BIOGL
2	7111144	7151314	1e-47		transmembrane protein 65-like n=1 Tax=Pecten maximus TaxID=6579 RepID=UPI001458A874
2	7194640	7223572	1e-154		Transcription factor SOXF (Fragment) n=1 Tax=Corbicula fluminea TaxID=45949 RepID=A0A4D6UZ70_9BIVA
2	7204787	172327_28
2	7210705	172329_31
2	7235308	172337_18
2	7247513	7263613	3e-66		phospholipid phosphatase 1-like n=1 Tax=Pecten maximus TaxID=6579 RepID=UPI001458F25C
2	7263905	7287475	4e-93		Centromere protein C 1 n=4 Tax=Crassostrea gigas TaxID=29159 RepID=K1PHT3_CRAGI
2	7288496	7306152	0		Predicted protein n=1 Tax=Nematostella vectensis TaxID=45351 RepID=A7STK4_NEMVE
2	7302844	172366_19
2	7306876	172368_15
2	7309916	7327341	0		Membralin n=2 Tax=Mizuhopecten yessoensis TaxID=6573 RepID=A0A210PNX6_MIZYE
2	7313360	172373_29
2	7314279	172374_34
2	7328671	7337830	9e-90		BRISC and BRCA1-A complex member 1 n=3 Tax=Crassostrea TaxID=6564 RepID=UPI0005C392FE
2	7331175	172379_8	0.0864805	0.00958094
2	7335164	172383_5
2	7338624	7351661	0		Leptin receptor overlapping transcript-like 1 n=2 Tax=Mizuhopecten yessoensis TaxID=6573 RepID=A0A210PNU1_MIZYE
2	7351777	7374772	0		transitional endoplasmic reticulum ATPase isoform X2 n=1 Tax=Mizuhopecten yessoensis TaxID=6573 RepID=UPI000B45E659
2	7432604	172415_15
2	7568307	172453_20
2	7611984	7624724	0		Intraflagellar transport protein 52-like n=4 Tax=Pectinidae TaxID=6566 RepID=A0A210QCF4_MIZYE
2	7625349	7651384	5e-77		Ankyrin repeat domain-containing protein 13C n=3 Tax=Pectinidae TaxID=6566 RepID=A0A210QMN3_MIZYE
2	7654124	7677207	2e-150		beta-1,3-galactosyltransferase 5 n=1 Tax=Crassostrea gigas TaxID=29159 RepID=UPI00148A4429
2	7691240	7779769	0		Beta-N-acetylhexosaminidase n=1 Tax=Crassostrea gigas TaxID=29159 RepID=K1QTN0_CRAGI
2	7705490	172479_28
2	7716225	172490_9
2	7732076	172498_4
2	7734244	172500_26
2	7787063	7829003	0		FGGY carbohydrate kinase domain-containing protein n=1 Tax=Mizuhopecten yessoensis TaxID=6573 RepID=A0A210PEK8_MIZYE
2	7829367	7904177	0		dual specificity protein phosphatase CDC14A isoform X1 n=11 Tax=Crassostrea TaxID=6564 RepID=UPI0005C36F68
2	7887993	172537_7
2	7904350	7911488	3e-146		solute carrier family 66 member 3-like n=1 Tax=Crassostrea gigas TaxID=29159 RepID=UPI00148AD97A
2	7910639	172543_33
2	7944662	8143001	0		Eyes absent homolog n=14 Tax=Lingula unguis TaxID=7574 RepID=A0A1S3K7A3_LINUN
2	7971000	188268_33
2	8062236	188309_5
2	8095394	188327_30
2	8115584	188338_18
2	8152440	8184953	0		C2 domain-containing protein n=1 Tax=Biomphalaria glabrata TaxID=6526 RepID=A0A2C9KCA6_BIOGL
2	8211430	188380_3	0.122628	0.00163722
2	8355099	188435_29
2	8400745	188451_4
2	8420024	8427987	0		E3 ubiquitin-protein ligase Midline-1-like n=2 Tax=Mizuhopecten yessoensis TaxID=6573 RepID=UPI000B45F511
2	8464976	188480_26
2	8475162	188481_25
2	8478309	188482_7
2	8496528	8503736	1e-26		translation initiation factor IF-2 isoform X7 n=7 Tax=Lingula unguis TaxID=7574 RepID=A0A1S3J7C6_LINUN
2	8504856	8514084	1e-26		SOSS complex subunit C n=2 Tax=Pectinidae TaxID=6566 RepID=A0A210QAL6_MIZYE
2	8506742	188497_30
2	8539287	188517_35
2	8557119	188525_7
2	8608752	8614931	1e-29		Protein-tyrosine-phosphatase n=18 Tax=Pectinidae TaxID=6566 RepID=A0A210R5D4_MIZYE
2	8617570	8628138	3e-114		Protein-tyrosine-phosphatase n=9 Tax=Gastropoda TaxID=6448 RepID=A0A2T7NQE6_POMCA
2	8672729	8705776	0		Lipid phosphate phosphatase-related protein type 5 n=2 Tax=Pectinidae TaxID=6566 RepID=A0A210QFK6_MIZYE
2	8726604	8770064	3e-06		Sperm flagellar protein 2 n=21 Tax=Crassostrea TaxID=6564 RepID=K1P929_CRAGI
2	8771924	8782310	4e-121		contactin-associated protein-like 5 isoform X1 n=11 Tax=Crassostrea gigas TaxID=29159 RepID=UPI0005C3D1CD
2	8943532	96534_30
2	9000939	9055546	0		CD109 antigen isoform X1 n=6 Tax=Crassostrea gigas TaxID=29159 RepID=UPI00148A41FD
2	9179855	9227839	0		LOW QUALITY PROTEIN: protein Hook homolog 3-like n=4 Tax=Pectinidae TaxID=6566 RepID=UPI00145903AD
2	9232538	9240476	2e-74		D-aspartate oxidase-like isoform X1 n=6 Tax=Crassostrea virginica TaxID=6565 RepID=UPI000BAF9853
2	9304088	96714_4
2	9348561	9392431	3e-90		BHLH domain-containing protein n=16 Tax=Ecdysozoa TaxID=1206794 RepID=A0A0K0ENM6_STRER
2	9390160	96749_17
2	9404117	96757_5
2	9421932	9430408	5e-160		Copper transporter n=2 Tax=Crassostrea gigas TaxID=29159 RepID=K1QJB8_CRAGI
2	9495525	96808_17
2	9514751	96821_6
2	9519699	96823_2
2	9531790	96835_7
2	9607674	9655114	4e-70		V-type proton ATPase 21 kDa proteolipid subunit n=2 Tax=Pectinidae TaxID=6566 RepID=A0A210PL68_MIZYE
2	9610851	96870_25
2	9655985	9660338	4e-159		RING-type domain-containing protein n=1 Tax=Hypsibius dujardini TaxID=232323 RepID=A0A1W0WWZ9_HYPDU
2	9710928	96907_26	0.105882	0.00326727
2	9711397	96909_2
2	9754560	96932_8
2	9789536	9804728	1e-135		Myosin regulatory light chain sqh n=4 Tax=Pteriomorphia TaxID=6545 RepID=K1Q122_CRAGI
2	10046073	10053389	0		CS domain-containing protein n=2 Tax=Pectinidae TaxID=6566 RepID=A0A210QAH6_MIZYE
2	10080799	97007_8
2	10120837	97029_34
2	10135911	97039_6
2	10153425	10281854	0		LOW QUALITY PROTEIN: choline transporter-like protein 1 n=1 Tax=Pecten maximus TaxID=6579 RepID=UPI001458467C
2	10252766	97074_3
2	10268854	97080_33
2	10286173	10304013	1e-17		multiple epidermal growth factor-like domains protein 6 isoform X1 n=3 Tax=Crassostrea virginica TaxID=6565 RepID=UPI000BAFD2E9
2	10309462	10312914	2e-173		tyrosine kinase receptor Cad96Ca-like n=1 Tax=Anneissia japonica TaxID=1529436 RepID=UPI001425AC7A
2	10322116	10343222	6e-130		Minor histocompatibility antigen H13 n=2 Tax=Pectinidae TaxID=6566 RepID=A0A210R0I4_MIZYE
2	10337014	97106_31
2	10344880	10360913	0		spindle and centriole-associated protein 1-like isoform X1 n=2 Tax=Crassostrea virginica TaxID=6565 RepID=UPI000BB0B4E8
2	10405398	10444352	8e-143		hypothetical protein n=1 Tax=Bathymodiolus brooksi thiotrophic gill symbiont TaxID=1052209 RepID=UPI001115DC19
2	10408952	97129_1
2	10575172	257896_33
2	10721387	97268_25
2	10776746	10784780	4e-59		ankyrin repeat domain-containing protein 66-like n=1 Tax=Aplysia californica TaxID=6500 RepID=UPI00065B783E
2	10800086	10807912	8e-113		DUF1768 domain-containing protein n=1 Tax=Mizuhopecten yessoensis TaxID=6573 RepID=A0A210Q493_MIZYE
2	10808707	10821725	8e-113		Protein YIPF n=3 Tax=Crassostrea gigas TaxID=29159 RepID=K1QJM2_CRAGI
2	10860736	97323_1
2	10962329	97359_0
2	10979263	10980426	1e-74		zinc finger protein 862-like n=1 Tax=Crassostrea gigas TaxID=29159 RepID=UPI00148A8BE0
2	11039974	11068409	1e-74		Nuclear pore complex protein Nup153 n=2 Tax=Mizuhopecten yessoensis TaxID=6573 RepID=A0A210PI61_MIZYE
2	11052280	97387_19
2	11064664	97392_19
2	11072158	11077067	2e-20		Mitochondrial ATP synthase delta chain n=1 Tax=Haliotis discus discus TaxID=91233 RepID=B6RB42_HALDI
2	11125907	11146610	0		WD_REPEATS_REGION domain-containing protein n=2 Tax=Pomacea canaliculata TaxID=400727 RepID=A0A2T7NP12_POMCA
2	11150974	11159652	3e-34		Thioredoxin n=1 Tax=Crassostrea ariakensis TaxID=94323 RepID=H9LTI4_CRAAR
2	11163590	11171797	7e-64		Thioredoxin n=1 Tax=Channa striata TaxID=64152 RepID=W0USM4_CHASR
2	11175720	11178896	7e-20		membrane progestin receptor beta-like n=2 Tax=Crassostrea virginica TaxID=6565 RepID=UPI000BAF81A8
2	11203247	11209792	0		C1q domain-containing protein DC34 (Fragment) n=1 Tax=Archivesica packardana TaxID=1299447 RepID=A0A4P8NK04_9BIVA
2	11211347	294319_17
2	11217270	11267481	0		A disintegrin and metalloproteinase with thrombospondin motifs 7 n=1 Tax=Mizuhopecten yessoensis TaxID=6573 RepID=A0A210PVW9_MIZYE
2	11246397	294331_7
2	11319996	294364_16
2	11413815	11415630	3e-24		Complex I-B14 n=1 Tax=Leptotrombidium deliense TaxID=299467 RepID=A0A443SAN5_9ACAR
2	11429725	11437417	7e-30		selenoprotein Pb-like n=1 Tax=Lingula unguis TaxID=7574 RepID=A0A1S3JI53_LINUN
2	11460713	276763_28
2	11487904	308164_34
2	11511605	308152_10
2	11652611	11660616	9e-55		Methyltransferase-like protein 4 n=2 Tax=Mizuhopecten yessoensis TaxID=6573 RepID=A0A210QJH6_MIZYE
2	11661068	11706270	4e-91		Fizzy-related protein-like n=3 Tax=Pectinidae TaxID=6566 RepID=A0A210R388_MIZYE
2	11713296	11731647	3e-68		serum paraoxonase/arylesterase 1-like n=2 Tax=Pecten maximus TaxID=6579 RepID=UPI001458E9DD
2	11769213	11802017	3e-111		CST complex subunit STN1 n=1 Tax=Mizuhopecten yessoensis TaxID=6573 RepID=A0A210Q9E5_MIZYE
2	11778234	308013_32
2	11779489	308010_27
2	11829405	11841952	0		N-acetyltransferase ESCO1 n=2 Tax=Mizuhopecten yessoensis TaxID=6573 RepID=A0A210PNM2_MIZYE
2	11843945	11863792	0		Leucine-rich repeat-containing protein 40 n=2 Tax=Crassostrea gigas TaxID=29159 RepID=K1QH70_CRAGI
2	11871843	11881362	4e-62		octopine dehydrogenase-like n=1 Tax=Pecten maximus TaxID=6579 RepID=UPI00145831AC
2	11874754	144621_16
2	11888738	11905315	9e-71		steroid 17-alpha-hydroxylase/17,20 lyase-like n=2 Tax=Pecten maximus TaxID=6579 RepID=UPI001457FAE6
2	11968401	12036511	1e-175		phosphatase and actin regulator 1-like isoform X1 n=4 Tax=Pecten maximus TaxID=6579 RepID=UPI0014589FE4
2	12039467	12072079	1e-174		L-threonine 3-dehydrogenase, mitochondrial n=3 Tax=Crassostrea TaxID=6564 RepID=K1QLV1_CRAGI
2	12098457	12101779	2e-35		Sulfotransfer_1 domain-containing protein n=1 Tax=Capitella teleta TaxID=283909 RepID=R7TNX6_CAPTE
2	12112824	12122949	0		E3 ubiquitin-protein ligase TRIM56 n=64 Tax=Boreoeutheria TaxID=1437010 RepID=TRI56_BOVIN
2	12118494	144525_31
2	12176180	12242238	0		LOW QUALITY PROTEIN: transcription initiation factor TFIID subunit 2-like n=1 Tax=Pomacea canaliculata TaxID=400727 RepID=UPI000D7277B9
2	12247719	12288343	2e-147		uncharacterized peptidase C1-like protein F26E4.3 isoform X2 n=2 Tax=Mizuhopecten yessoensis TaxID=6573 RepID=UPI000B457A48
2	12302185	12364392	0		Elav n=1 Tax=Nucula tumidula TaxID=437803 RepID=A0A3G2LMK0_9BIVA
2	12317893	144451_8
2	12333371	144446_30
2	12362169	144429_7
2	12364948	12433398	0		Cytosolic carboxypeptidase 6 n=2 Tax=Pectinidae TaxID=6566 RepID=A0A210PVY6_MIZYE
2	12435188	12442291	3e-76		NHP2-like protein 1 n=2 Tax=Clupeocephala TaxID=186625 RepID=UPI000F50BC35
2	12447839	12467958	3e-145		E3 ubiquitin-protein ligase MARCH1 n=5 Tax=Crassostrea TaxID=6564 RepID=K1PM39_CRAGI
2	12469945	12490214	0		LOW QUALITY PROTEIN: adenosine 3'-phospho 5'-phosphosulfate transporter 2-like n=1 Tax=Pecten maximus TaxID=6579 RepID=UPI001458C44C
2	12491682	12503236	3e-17		Kinase-like protein n=1 Tax=Rozella allomycis (strain CSF55) TaxID=988480 RepID=A0A075ASB3_ROZAC
2	12505798	144361_3
2	12554643	12579665	3e-17		Glucosidase 2 subunit beta n=2 Tax=Pomacea canaliculata TaxID=400727 RepID=A0A2T7NPL7_POMCA
2	12617825	12711416	5e-138		L-xylulose reductase n=2 Tax=Pectinidae TaxID=6566 RepID=A0A210QX80_MIZYE
2	12662499	144276_11
2	12688892	144267_9
2	12726783	12774294	7e-138		GDP-fucose protein O-fucosyltransferase 1 n=2 Tax=Crassostrea gigas TaxID=29159 RepID=K1PJD7_CRAGI
2	12779825	12804494	3e-93		Ferric-chelate reductase 1 n=2 Tax=Mizuhopecten yessoensis TaxID=6573 RepID=A0A210QC97_MIZYE
2	12800003	144200_10
2	12806186	12807501	2e-19		Putative ferric-chelate reductase 1 n=4 Tax=Crassostrea gigas TaxID=29159 RepID=K1RP14_CRAGI
2	12829242	12834104	4e-26		LOW QUALITY PROTEIN: ferric-chelate reductase 1-like n=1 Tax=Crassostrea virginica TaxID=6565 RepID=UPI000BAF839B
2	12837411	12847434	4e-26		LOW QUALITY PROTEIN: neurocalcin-delta-like n=1 Tax=Crassostrea virginica TaxID=6565 RepID=UPI000BAF3885
2	12855637	12894330	0		Enoyl-CoA hydratase n=1 Tax=Arion vulgaris TaxID=1028688 RepID=A0A0B7B943_9EUPU
2	12929365	13023046	2e-130		protein 4.1 isoform X23 n=2 Tax=Lingula unguis TaxID=7574 RepID=A0A1S3IZY6_LINUN
2	12975802	296518_5
2	13025089	13028209	0		glutathione S-transferase DHAR2-like n=1 Tax=Aplysia californica TaxID=6500 RepID=UPI00065B8243
2	13030496	13112386	6e-63		Protein RIC1 homolog n=2 Tax=Pectinidae TaxID=6566 RepID=A0A210QAN5_MIZYE
2	13123054	13141659	0		tctex1 domain-containing protein 1-B-like isoform X2 n=1 Tax=Branchiostoma belcheri TaxID=7741 RepID=UPI000947B63C
2	13142495	13169736	0		Sorting nexin-30 n=2 Tax=Pectinidae TaxID=6566 RepID=A0A210QAL1_MIZYE
2	13144413	296598_27
2	13238027	296652_8
2	13476683	296794_5
2	13523442	13565844	0		epidermal growth factor receptor substrate 15-like 1 n=5 Tax=Crassostrea gigas TaxID=29159 RepID=UPI00097522DB
2	13656461	13658437	1e-101		Reverse transcriptase domain-containing protein n=1 Tax=Bathymodiolus brooksi thiotrophic gill symbiont TaxID=1052209 RepID=A0A482YR97_9BACT
2	13721213	13727453	4e-30		Zinc finger and BTB domain-containing protein 40 n=1 Tax=Mizuhopecten yessoensis TaxID=6573 RepID=A0A210QCT5_MIZYE
2	13726044	296967_7
2	13729582	296970_32
2	13794300	297001_32
2	13800365	297003_34
2	13853759	297027_6
2	13962344	297086_33
2	13986033	14032596	7e-49		ATPase family AAA domain-containing protein 2 n=1 Tax=Lingula unguis TaxID=7574 RepID=A0A1S3JS91_LINUN
2	14008181	297103_32
2	14040269	14050256	0		Methyltransferase-like protein 7A n=2 Tax=Crassostrea gigas TaxID=29159 RepID=K1PBS8_CRAGI
2	14189540	297199_6
2	14206468	14230614	0		voltage-dependent calcium channel subunit alpha-2/delta-2-like n=1 Tax=Pecten maximus TaxID=6579 RepID=UPI001458ED9A
2	14220375	297210_2	0.0737913	0.00672835
2	14232278	14245817	0		Tctex1 domain-containing protein 1 n=3 Tax=Crassostrea TaxID=6564 RepID=K1RI39_CRAGI
2	14460059	14494936	0		Hippocampus abundant transcript 1 protein n=3 Tax=Pectinidae TaxID=6566 RepID=A0A210QAI2_MIZYE
2	14702476	14745816	5e-69		Prostanoid TP receptor n=2 Tax=Mizuhopecten yessoensis TaxID=6573 RepID=A0A210PE98_MIZYE
2	14773457	14774664	4e-21		Reverse transcriptase domain-containing protein n=2 Tax=Bathymodiolus brooksi thiotrophic gill symbiont TaxID=1052209 RepID=A0A482YRV1_9BACT
2	14790409	14804386	0		TLC domain-containing protein 4-B-like n=1 Tax=Crassostrea gigas TaxID=29159 RepID=UPI0005C3847A
2	14829205	271577_4
2	14959619	14968767	4e-19		Ribosomal_L7Ae domain-containing protein n=1 Tax=Capitella teleta TaxID=283909 RepID=R7TW42_CAPTE
2	15084369	15088453	5e-19		Ribosomal_L7Ae domain-containing protein n=1 Tax=Lottia gigantea TaxID=225164 RepID=V3ZV96_LOTGI
2	15131235	15134932	2e-162		growth arrest and DNA damage-inducible protein GADD45 beta-like n=1 Tax=Crassostrea virginica TaxID=6565 RepID=UPI000BB06B7A
2	15310977	15329905	0		GRIP domain-containing protein n=1 Tax=Lottia gigantea TaxID=225164 RepID=V4AYZ5_LOTGI
2	15352280	15354888	0		major facilitator superfamily domain-containing protein 1-like n=1 Tax=Sinocyclocheilus rhinocerous TaxID=307959 RepID=UPI0007B90DEA
2	15356510	15369131	0		xylose isomerase-like n=2 Tax=Crassostrea TaxID=6564 RepID=UPI00148AD6F7
2	15401044	15409152	3e-176		alpha-ketoglutarate-dependent 2,4-dichlorophenoxyacetate dioxygenase n=1 Tax=Crassostrea gigas TaxID=29159 RepID=UPI00148A5338
2	15430762	15456508	7e-89		cytochrome c oxidase assembly factor 7 homolog n=1 Tax=Centruroides sculpturatus TaxID=218467 RepID=UPI000C6D532A
2	15457546	15470824	9e-153		UMP-CMP kinase-like n=3 Tax=Crassostrea TaxID=6564 RepID=UPI0005C37F22
2	15474439	15491934	0		SCL-interrupting locus protein n=1 Tax=Mizuhopecten yessoensis TaxID=6573 RepID=A0A210QBV6_MIZYE
2	15514019	15521860	0		Lipase maturation factor n=2 Tax=Crassostrea gigas TaxID=29159 RepID=K1QJR5_CRAGI
2	15522102	15524021	4e-176		Lipase maturation factor n=2 Tax=Crassostrea gigas TaxID=29159 RepID=K1QJR5_CRAGI
2	15546299	15562028	3e-96		LOW QUALITY PROTEIN: mediator of RNA polymerase II transcription subunit 26-like n=1 Tax=Pecten maximus TaxID=6579 RepID=UPI001458CBBE
2	15555311	67647_31
2	15562157	15606411	2e-31		p21-activated protein kinase-interacting protein 1-like n=1 Tax=Pecten maximus TaxID=6579 RepID=UPI0014582845
2	15623114	15640447	6e-155		Transmembrane protein 214A n=2 Tax=Pectinidae TaxID=6566 RepID=A0A210PGD7_MIZYE
2	15643140	15655301	0		Deoxyribonuclease TATDN1 n=1 Tax=Mizuhopecten yessoensis TaxID=6573 RepID=A0A210PE91_MIZYE
2	15668307	67597_33
2	15676493	15718834	0		Importin N-terminal domain-containing protein n=2 Tax=Octopus bimaculoides TaxID=37653 RepID=A0A0L8HH33_OCTBM
2	15714585	67573_17
2	15732071	15735897	0		OTU domain-containing protein n=1 Tax=invertebrate metagenome TaxID=1711999 RepID=A0A2H9T3C2_9ZZZZ
2	15737954	15746577	1e-136		RING finger and CHY zinc finger domain-containing protein 1-like isoform X1 n=2 Tax=Crassostrea gigas TaxID=29159 RepID=UPI00148A2372
2	15753276	15828944	1e-136		LOW QUALITY PROTEIN: KN motif and ankyrin repeat domain-containing protein 1-like n=1 Tax=Pecten maximus TaxID=6579 RepID=UPI001458A83F
2	15763212	67551_24
2	15777179	67548_31
2	15830900	15855331	0		Tyrosine-protein kinase n=2 Tax=Crassostrea TaxID=6564 RepID=K1Q9U0_CRAGI
2	15862911	15926285	0		sushi, von Willebrand factor type A, EGF and pentraxin domain-containing protein 1-like n=1 Tax=Pecten maximus TaxID=6579 RepID=UPI00145817B5
2	15866741	67509_10
2	15904671	67502_1
2	16086038	16101172	0		elongation of very long chain fatty acids protein 4-like n=1 Tax=Anneissia japonica TaxID=1529436 RepID=UPI0014256113
2	16101949	16154819	0		LOW QUALITY PROTEIN: uncharacterized protein LOC117326485 n=1 Tax=Pecten maximus TaxID=6579 RepID=UPI0014583CEE
2	16193688	16194691	3e-112		Exodeoxyribonuclease III n=1 Tax=Bathymodiolus brooksi thiotrophic gill symbiont TaxID=1052209 RepID=A0A482YV96_9BACT
2	16202139	16302786	3e-69		transient receptor potential cation channel subfamily A member 1-like isoform X1 n=4 Tax=Pecten maximus TaxID=6579 RepID=UPI001458B0F1
2	16270435	67291_19
2	16282032	67285_19	0.0627945	0.00904058
2	16303984	16312301	5e-174		Elongin-C n=2 Tax=Mizuhopecten yessoensis TaxID=6573 RepID=A0A210QBT3_MIZYE
2	16314294	16349264	3e-123		COBW domain-containing protein 1 n=2 Tax=Pectinidae TaxID=6566 RepID=A0A210PNU3_MIZYE
2	16371357	16383152	1e-139		Ankyrin repeat domain-containing protein 63 n=6 Tax=Pectinidae TaxID=6566 RepID=A0A210R0E6_MIZYE
2	16489875	67174_1
2	16490179	16495836	2e-19		NADH dehydrogenase [ubiquinone] 1 beta subcomplex subunit 7 n=1 Tax=Arion vulgaris TaxID=1028688 RepID=A0A0B7A071_9EUPU
2	16497996	16500165	2e-139		Reverse transcriptase domain-containing protein n=1 Tax=Elysia chlorotica TaxID=188477 RepID=A0A3S1BL65_ELYCH
2	16503462	67163_24
2	16515994	67156_19
2	16541241	16563329	3e-156		ethanolaminephosphotransferase 1-like n=1 Tax=Aplysia californica TaxID=6500 RepID=UPI00065B5398
[truncated: 16,250 more rows]
[truncated: 5 more columns]

## Sheet: Supplementary Table 4
Table S4: List of 1,418 SNPs associated to the 768 differentially expressed genes (DEG) detected in Cerastoderma edule after exposition to Marteilia cochillia.(Pardo et al., 2022). Coordinates for each DEG in the cockle genome (Chr: chromosome; start and end of the gene in bp) and its annotation along with the position of each SNP and its genetic diversity estimators in the whole population data …
Chr	Start gene/ SNP Position	End gene	DEG annotation / SNP_ID	Missing data	He	MAF	FST	p-value
1	1356484	1399978	PALP domain-containing protein n=1 Tax=Lottia gigantea TaxID=225164 RepID=V3ZFN0_LOTGI
1	1397498		1_1397498	0.02	0.492503	0.438776	0.0048	0.551214
1	1397533		1_1397533	0.04	0.494575	0.447917	0.0354	0.191702
1	1403140	1425633	Neuronal PAS domain-containing protein 4 n=2 Tax=Mizuhopecten yessoensis TaxID=6573 RepID=A0A210R459_MIZYE
1	2163256	2164569	Exodeoxyribonuclease III n=1 Tax=Bathymodiolus brooksi thiotrophic gill symbiont TaxID=1052209 RepID=A0A482YUR2_9BACT
1	4546701	4567218	Stress-induced-phosphoprotein 1 n=5 Tax=Crassostrea gigas TaxID=29159 RepID=K1PBB1_CRAGI
1	4563549		1_4563549	0	0.4758	0.39	-0.0159	0.755588
1	4565947		1_4565947	0.02	0.479175	0.397959	-0.013	0.631546
1	5993658	6049348	Tubulin-specific chaperone E-like n=1 Tax=Crassostrea virginica TaxID=6565 RepID=UPI000BAF192E
1	5997739		1_5997739	0	0.495	0.45	-0.0141	0.52126
1	5997754		1_5997754	0	0.4872	0.42	-0.0242	0.869966
1	7012343	7082159	T-complex protein 1 subunit delta n=2 Tax=Pectinidae TaxID=6566 RepID=A0A210PXL7_MIZYE
1	7013935		1_7013935	0	0.4488	0.34	-0.0105	0.614858
1	7015079		1_7015079	0	0.4982	0.47	0.0329	0.129296
1	8380525	8390105	Ependymin related protein-1 n=1 Tax=Ruditapes philippinarum TaxID=129788 RepID=A0A3G2CKJ1_RUDPH
1	8381137		1_8381137	0.24	0.347299	0.223684	-0.0156	0.47506
1	8388322		1_8388322	0.14	0.33099	0.209302	-0.0258	0.339822
1	10532512	10573501	Sodium-dependent phosphate transport protein 2B-like n=1 Tax=Octopus vulgaris TaxID=6645 RepID=UPI001140C183
1	10568668		1_10568668	0	0.4992	0.48	-0.0095	0.384312
1	10572599		1_10572599	0	0.4032	0.28	-0.0033	0.308964
1	11691735	11733878	Cell division control protein 42 homolog n=1 Tax=Pomacea canaliculata TaxID=400727 RepID=UPI000D733F31
1	11692610		1_11692610	0	0.4998	0.49	-0.0155	0.610452
1	11692742		1_11692742	0	0.5	0.5	-0.0331	0.966156
1	11802084	11832057	Lysosomal-trafficking regulator n=2 Tax=Mizuhopecten yessoensis TaxID=6573 RepID=A0A210PMB4_MIZYE
1	11815226		1_11815226	0	0.4352	0.32	-0.0019	0.377384
1	11827950		1_11827950	0.04	0.486111	0.416667	0.1275	0.003192
1	16364880	16368633	G_PROTEIN_RECEP_F1_2 domain-containing protein n=3 Tax=Pomacea canaliculata TaxID=400727 RepID=A0A2T7PWL6_POMCA
1	16368065		1_16368065	0.28	0.496528	0.458333	-0.0594	1
1	16368143		1_16368143	0.28	0.345679	0.222222	-0.0619	1
1	16762704	16816473	Protein numb-like isoform X1 n=15 Tax=Crassostrea TaxID=6564 RepID=UPI00148A2DF0
1	16762917		1_16762917	0	0.4992	0.48	-0.0212	0.668624
1	16763973		1_16763973	0	0.4872	0.42	-0.0289	0.65869
1	18059248	18107779	Rho GTPase n=3 Tax=Pectinidae TaxID=6566 RepID=A0A0N9HK02_MIZYE
1	18100989		1_18100989	0	0.4712	0.38	-0.0151	0.606544
1	18102511		1_18102511	0	0.4902	0.43	0.0143	0.255492
1	18978316	19012363	Cyclic nucleotide-binding domain-containing protein 2-like n=1 Tax=Pecten maximus TaxID=6579 RepID=UPI001458D427
1	18980226		1_18980226	0.14	0.48675	0.418605	-0.0389	0.824174
1	18985767		1_18985767	0.12	0.483471	0.409091	0.078	0.030748
1	21421187	21443538	Dehydrogenase/reductase SDR family member 1-like n=1 Tax=Crassostrea virginica TaxID=6565 RepID=UPI000BAFED4B
1	21421762		1_21421762	0	0.4838	0.41	0.028	0.124042
1	21441252		1_21441252	0	0.5	0.5	-0.0294	0.740556
1	21616877	21644987	Calmodulin n=1 Tax=Serendipita indica (strain DSM 11827) TaxID=1109443 RepID=G4TIQ3_SERID
1	21629173		1_21629173	0.1	0.493827	0.444444	-0.0299	0.522592
1	22910757	22971597	Ribosome-binding protein 1-like isoform X1 n=16 Tax=Crassostrea virginica TaxID=6565 RepID=UPI000BAFBB7E
1	22911560		1_22911560	0	0.4998	0.49	-0.0011	0.376386
1	22934113		1_22934113	0	0.4992	0.48	0.0135	0.331454
1	23471626	23493574	RBR-type E3 ubiquitin transferase n=3 Tax=Crassostrea gigas TaxID=29159 RepID=K1Q5J3_CRAGI
1	24945922	24954043	SpoU_methylase domain-containing protein n=1 Tax=Biomphalaria glabrata TaxID=6526 RepID=A0A2C9JQH1_BIOGL
1	24947223		1_24947223	0	0.4712	0.38	-0.0234	0.605954
1	24951424		1_24951424	0	0.2952	0.18	0.1274	0.00612
1	25496572	25599526	Kazal-like domain-containing protein n=1 Tax=Arion vulgaris TaxID=1028688 RepID=A0A0B7AQU4_9EUPU
1	25594873		1_25594873	0	0.4998	0.49	0.1214	0.005922
1	25595599		1_25595599	0	0.495	0.45	0.0145	0.270698
1	26243258	26292465	Low-density lipoprotein receptor-related protein 4-like isoform X1 n=3 Tax=Centruroides sculpturatus TaxID=218467 RepID=UPI000C6DA00E
1	26276928		1_26276928	0	0.4998	0.49	-0.0451	1
1	26279635		1_26279635	0	0.4608	0.36	-0.0052	0.52023
1	27092083	27098463	Retinol dehydrogenase 13-like n=1 Tax=Pecten maximus TaxID=6579 RepID=UPI001458291E
1	27108025	27228382	Putative nuclease HARBI1 n=4 Tax=Pecten maximus TaxID=6579 RepID=UPI001458761E
1	27217236		1_27217236	0.16	0.481859	0.404762	-0.0175	0.48749
1	27217414		1_27217414	0.22	0.498685	0.474359	-0.0023	0.279386
1	27380802	27392610	GOLD domain-containing protein n=1 Tax=Lottia gigantea TaxID=225164 RepID=V4AC86_LOTGI
1	27381716		1_27381716	0	0.4992	0.48	-0.0304	1
1	27382745		1_27382745	0	0.4992	0.48	0.0031	0.337606
1	28433186	28469958	Zf-Sec23_Sec24 domain-containing protein n=1 Tax=Pomacea canaliculata TaxID=400727 RepID=A0A2T7PFW0_POMCA
1	28944381	28954204	3 Beta-hydroxysteroid dehydrogenase/Delta 5-->4-isomerase type 4-like n=1 Tax=Pecten maximus TaxID=6579 RepID=UPI00145883B9
1	28951827		1_28951827	0.12	0.44938	0.340909	-0.0291	0.526668
1	28951946		1_28951946	0.12	0.474174	0.386364	-0.0314	0.62252
1	29191664	29251858	Protein phosphatase 1 regulatory subunit 21 isoform X1 n=4 Tax=Crassostrea TaxID=6564 RepID=UPI00148A5BD6
1	29208731		1_29208731	0	0.4982	0.47	-0.0135	0.616188
1	29217592		1_29217592	0	0.48	0.4	0.0045	0.222304
1	29290056	29354140	Tripartite motif-containing protein 45 n=2 Tax=Crassostrea gigas TaxID=29159 RepID=K1RGM9_CRAGI
1	29350831		1_29350831	0	0.4712	0.38	-0.0067	0.456112
1	29351158		1_29351158	0	0.48	0.4	0.018	0.235462
1	31285932	31338362	Mediator of RNA polymerase II transcription subunit 6 n=2 Tax=Pectinidae TaxID=6566 RepID=A0A210Q453_MIZYE
1	31286613		1_31286613	0	0.4872	0.42	-0.0349	0.87108
1	31292642		1_31292642	0	0.48	0.4	0.0561	0.046458
1	32259773	32270203	RBR-type E3 ubiquitin transferase n=3 Tax=Crassostrea gigas TaxID=29159 RepID=K1Q5J3_CRAGI
1	32266063		1_32266063	0	0.4982	0.47	0.0223	0.168364
1	32266185		1_32266185	0	0.4902	0.43	-0.0032	0.34213
1	32334304	32352857	Proto-oncogene c-Fos-like isoform X1 n=8 Tax=Crassostrea virginica TaxID=6565 RepID=UPI000BAE6B5C
1	32334566		1_32334566	0	0.4928	0.44	0.0119	0.324888
1	32334849		1_32334849	0	0.3648	0.24	0.037	0.108982
1	33210842	33229114	Transmembrane protein 179-like n=1 Tax=Pecten maximus TaxID=6579 RepID=UPI0014583B95
1	33213105		1_33213105	0	0.4992	0.48	-0.0308	0.902922
1	33213130		1_33213130	0	0.495	0.45	-0.0294	0.871452
1	38106839	38116828	Signal recognition particle 14 kDa protein n=2 Tax=Crassostrea TaxID=6564 RepID=UPI0005C37FAE
1	38113479		1_38113479	0	0.4608	0.36	0.0271	0.164952
1	38113860		1_38113860	0	0.4982	0.47	0.0662	0.035664
1	39243556	39287986	Sphingolipid 4-desaturase n=1 Tax=Lottia gigantea TaxID=225164 RepID=V4ARV4_LOTGI
1	39244948		1_39244948	0	0.32	0.2	-0.003	0.406104
1	39245825		1_39245825	0	0.48	0.4	0.0049	0.326108
1	39485925	39532718	2-aminoethylphosphonate--pyruvate transaminase n=1 Tax=Mizuhopecten yessoensis TaxID=6573 RepID=A0A210Q0A6_MIZYE
1	39526950		1_39526950	0	0.1638	0.09	0.1374	0.001298
1	39528547		1_39528547	0	0.4838	0.41	0.0788	0.01381
1	42125207	42148286	Dihydroxyacetone phosphate acyltransferase n=2 Tax=Pectinidae TaxID=6566 RepID=A0A210QCY9_MIZYE
1	42132790		1_42132790	0	0.4902	0.43	0.0612	0.039722
1	42133967		1_42133967	0	0.4998	0.49	-0.0011	0.375302
1	42594114	42601866	Malate dehydrogenase n=2 Tax=Oikopleura dioica TaxID=34765 RepID=E4WX88_OIKDI
1	42595939		1_42595939	0	0.255	0.15	0.0154	0.165756
1	42600116		1_42600116	0	0.495	0.45	-0.0192	0.664292
1	42686896	42694733	GTP-binding protein YPTC1 n=3 Tax=core chlorophytes TaxID=2692248 RepID=I0YS06_COCSC
1	42692934		1_42692934	0.2	0.199687	0.1125	0.0463	0.053426
1	42694349		1_42694349	0.22	0.483892	0.410256	-0.024	0.698112
1	42706173	42724973	NUC153 domain-containing protein n=1 Tax=Lottia gigantea TaxID=225164 RepID=V4BAF6_LOTGI
1	42714374		1_42714374	0	0.4608	0.36	-0.0031	0.400902
1	42715008		1_42715008	0	0.4992	0.48	-0.0178	0.713148
1	43306904	43321521	ATP-binding cassette sub-family G member 5 n=2 Tax=Crassostrea gigas TaxID=29159 RepID=K1R5C9_CRAGI
1	43312343		1_43312343	0	0.455	0.35	0.0291	0.154364
1	43319699		1_43319699	0	0.4968	0.46	-0.0138	0.604296
1	43325447	43364365	ATP-binding cassette sub-family G member 5 n=2 Tax=Pectinidae TaxID=6566 RepID=A0A210Q7Z0_MIZYE
1	43326534		1_43326534	0	0.4982	0.47	-0.0174	0.787978
1	43331114		1_43331114	0	0.4902	0.43	0.1147	0.008894
1	45952830	46053812	Ephrin type-A receptor 3-like n=1 Tax=Pecten maximus TaxID=6579 RepID=UPI0014586170
1	45954020		1_45954020	0	0.4928	0.44	-0.0029	0.367372
1	46008880		1_46008880	0	0.4998	0.49	0.027	0.177906
1	46179377	46189795	Epididymal secretory protein E1 16.5 kDa secretory protein n=1 Tax=Channa argus TaxID=215402 RepID=A0A6G1QFD5_9TELE
1	46181361		1_46181361	0	0.4488	0.34	0.0804	0.026012
1	46181847		1_46181847	0	0.48	0.4	0.0078	0.330124
1	49624913	49640661	Gluconolactonase n=3 Tax=Crassostrea TaxID=6564 RepID=K1QCP2_CRAGI
1	49630729		1_49630729	0	0.4352	0.32	0.0041	0.537878
1	49630730		1_49630730	0	0.4488	0.34	-0.0033	0.687076
1	49715078	49756028	Neutral alpha-glucosidase AB n=2 Tax=Mizuhopecten yessoensis TaxID=6573 RepID=A0A210PMP9_MIZYE
1	49731880		1_49731880	0	0.4998	0.49	-0.0221	0.90406
1	49737316		1_49737316	0	0.4928	0.44	0.0129	0.209634
1	49914425	49918202	Epididymal secretory protein E1-like n=1 Tax=Crassostrea virginica TaxID=6565 RepID=UPI000BB08DFE
1	49916420		1_49916420	0.12	0.479081	0.397727	0.0418	0.087628
1	49949337	49992606	Alpha-mannosidase n=4 Tax=Mizuhopecten yessoensis TaxID=6573 RepID=A0A210QP56_MIZYE
1	49978467		1_49978467	0	0.4998	0.49	-0.0165	0.665976
1	49978512		1_49978512	0	0.4998	0.49	-0.009	0.526428
1	51137032	51142937	C1q domain-containing protein DC17 (Fragment) n=3 Tax=Archivesica packardana TaxID=1299447 RepID=A0A4P8NI35_9BIVA
1	51140149		1_51140149	0.22	0.163379	0.0897436	0.0523	0.14008
1	51140407		1_51140407	0.16	0.465703	0.369048	-0.0351	0.7554
1	52210593	52236120	WD repeat-containing protein 27 n=3 Tax=Pectinidae TaxID=6566 RepID=A0A210PP53_MIZYE
1	52212160		1_52212160	0	0.495	0.45	0.066	0.04546
1	52212185		1_52212185	0	0.3648	0.24	-0.0077	0.478456
1	52243573	52277754	WD repeat-containing protein 43-like n=2 Tax=Lingula unguis TaxID=7574 RepID=A0A1S3HV08_LINUN
1	52247633		1_52247633	0	0.4758	0.39	0.0059	0.411704
1	52273481		1_52273481	0	0.48	0.4	-0.0349	1
1	54588551	54604382	ADP-ribosylation factor-like protein 2 n=4 Tax=Pteriomorphia TaxID=6545 RepID=K1RUY4_CRAGI
1	54601283		1_54601283	0	0.4662	0.37	0.0096	0.280514
1	54601285		1_54601285	0	0.4902	0.43	0.0617	0.059506
1	54934609	54951357	L-2-hydroxyglutarate dehydrogenase, mitochondrial n=2 Tax=Crassostrea gigas TaxID=29159 RepID=K1R224_CRAGI
1	54940322		1_54940322	0	0.4902	0.43	-0.0235	0.688914
1	54940325		1_54940325	0	0.4872	0.42	-0.018	0.535052
1	54955178	54975383	Cysteine sulfinic acid decarboxylase-like isoform X1 n=2 Tax=Mizuhopecten yessoensis TaxID=6573 RepID=UPI000B45D674
1	54965604		1_54965604	0	0.4992	0.48	-0.0235	0.642802
1	54967756		1_54967756	0	0.4422	0.33	-0.0166	0.655376
1	55134420	55175171	serine palmitoyltransferase 2-like n=1 Tax=Aplysia californica TaxID=6500 RepID=UPI00065BA0B3
1	55150685		1_55150685	0	0.4422	0.33	-0.0189	0.631216
1	55154677		1_55154677	0	0.5	0.5	0.0022	0.307888
1	60340555	60359345	Cleft lip and palate transmembrane protein 1-like n=2 Tax=Mizuhopecten yessoensis TaxID=6573 RepID=A0A210QRV1_MIZYE
1	60353461		1_60353461	0	0.4902	0.43	-0.0048	0.394658
1	60357064		1_60357064	0	0.2822	0.17	-0.0134	0.388176
1	61669840	61690415	Putative establishment of meiotic spindle orientation (Fragment) n=2 Tax=Nyssorhynchus TaxID=44543 RepID=T1EAD2_ANOAQ
1	61684106		1_61684106	0	0.4662	0.37	-0.0309	0.807916
1	61688773		1_61688773	0	0.4662	0.37	0.1051	0.013006
1	61721159	61736507	Kal-1 n=2 Tax=Pristionchus pacificus TaxID=54126 RepID=H3EXT0_PRIPA
1	61732771		1_61732771	0.26	0.482104	0.405405	-0.0045	0.27324
1	61732868		1_61732868	0.26	0.368152	0.243243	-0.0213	0.483282
1	63155351	63165453	hypothetical protein n=1 Tax=Aphanizomenon sp. UHCC 0183 TaxID=2590028 RepID=UPI001445F14C
1	63155732		1_63155732	0.3	0.156735	0.0857143	0.0284	0.10417
2	838248	839539	Arylsulfatase B n=2 Tax=Mizuhopecten yessoensis TaxID=6573 RepID=A0A210QUB6_MIZYE
2	1474295	1484916	LOW QUALITY PROTEIN: alkaline phosphatase-like n=1 Tax=Crassostrea virginica TaxID=6565 RepID=UPI000BAF795B
2	2764642	2818317	Lysine histidine transporter 1 n=3 Tax=Crassostrea gigas TaxID=29159 RepID=K1RT88_CRAGI
2	2783528		2_2783528	0.06	0.497963	0.468085	-0.0087	0.34803
2	2795446		2_2795446	0.08	0.272921	0.163043	-0.0338	0.877446
2	4841037	4873350	trafficking protein particle complex subunit 12-like n=1 Tax=Pecten maximus TaxID=6579 RepID=UPI0014587FF3
2	4841804		2_4841804	0	0.495	0.45	-0.0218	0.656818
2	4842196		2_4842196	0	0.4838	0.41	-0.0367	1
2	4976551	4993962	PDZ domain-containing protein n=2 Tax=Pomacea canaliculata TaxID=400727 RepID=A0A2T7NPH3_POMCA
2	4990148		2_4990148	0	0.3648	0.24	-0.0325	1
2	4991103		2_4991103	0	0.4982	0.47	0.0171	0.198218
2	5074655	5110329	Elongation of very long chain fatty acids protein n=1 Tax=Sinonovacula constricta TaxID=98310 RepID=A0A4Y5JSY5_SINCO
2	5077536		2_5077536	0	0.5	0.5	-0.0305	0.966972
2	5077537		2_5077537	0	0.5	0.5	-0.0305	0.966266
2	5575867	5583520	cholesterol 25-hydroxylase-like n=1 Tax=Crassostrea gigas TaxID=29159 RepID=UPI00148ABB1D
2	5582531		2_5582531	0.16	0.489796	0.428571	0.0541	0.051834
2	5583147		2_5583147	0.24	0.483033	0.407895	-0.0114	0.272762
2	6382998	6403130	non-specific lipid-transfer protein-like n=1 Tax=Priapulus caudatus TaxID=37621 RepID=UPI000719AD4E
2	6383856		2_6383856	0.16	0.459184	0.357143	0.116	0.016744
2	6389004		2_6389004	0	0.4998	0.49	0.0211	0.164612
2	7194640	7223572	Transcription factor SOXF (Fragment) n=1 Tax=Corbicula fluminea TaxID=45949 RepID=A0A4D6UZ70_9BIVA
2	7197875		2_7197875	0.04	0.498047	0.46875	0	0.727742
2	7197893		2_7197893	0.1	0.5	0.5	-0.0022	0.961986
2	7351777	7374772	transitional endoplasmic reticulum ATPase isoform X2 n=1 Tax=Mizuhopecten yessoensis TaxID=6573 RepID=UPI000B45E659
2	7359970		2_7359970	0	0.4278	0.31	-0.0329	0.85461
2	7363512		2_7363512	0	0.4968	0.46	0.0231	0.169812
2	11203247	11209792	C1q domain-containing protein DC34 (Fragment) n=1 Tax=Archivesica packardana TaxID=1299447 RepID=A0A4P8NK04_9BIVA
2	11204277		2_11204277	0.02	0.299875	0.183673	0.0342	0.081954
2	11208965		2_11208965	0.06	0.426664	0.308511	-0.0172	0.39399
2	11713296	11731647	serum paraoxonase/arylesterase 1-like n=2 Tax=Pecten maximus TaxID=6579 RepID=UPI001458E9DD
2	11722010		2_11722010	0.08	0.431711	0.315217	-0.0285	0.780264
2	11722022		2_11722022	0.08	0.439509	0.326087	-0.01	0.43906
2	12247719	12288343	uncharacterized peptidase C1-like protein F26E4.3 isoform X2 n=2 Tax=Mizuhopecten yessoensis TaxID=6573 RepID=UPI000B457A48
2	12255185		2_12255185	0	0.4928	0.44	0.021	0.155018
2	12255844		2_12255844	0	0.4872	0.42	-0.0155	0.664512
2	12554643	12579665	Glucosidase 2 subunit beta n=2 Tax=Pomacea canaliculata TaxID=400727 RepID=A0A2T7NPL7_POMCA
2	12565010		2_12565010	0	0.32	0.2	-0.0247	0.948524
2	12565016		2_12565016	0	0.5	0.5	0.0284	0.13412
2	14790409	14804386	TLC domain-containing protein 4-B-like n=1 Tax=Crassostrea gigas TaxID=29159 RepID=UPI0005C3847A
2	14795384		2_14795384	0	0.4278	0.31	-0.0166	0.491184
2	14795502		2_14795502	0	0.48	0.4	0.0161	0.13466
2	15623114	15640447	Transmembrane protein 214A n=2 Tax=Pectinidae TaxID=6566 RepID=A0A210PGD7_MIZYE
2	15626009		2_15626009	0	0.4992	0.48	0.0342	0.127062
2	15626046		2_15626046	0	0.4992	0.48	0.0321	0.119544
2	15862911	15926285	sushi, von Willebrand factor type A, EGF and pentraxin domain-containing protein 1-like n=1 Tax=Pecten maximus TaxID=6579 RepID=UPI00145817B5
2	15890328		2_15890328	0	0.4118	0.29	0.0265	0.203832
2	15890363		2_15890363	0	0.4032	0.28	0.0337	0.162804
2	16832049	16835878	short-chain collagen C4-like n=1 Tax=Branchiostoma belcheri TaxID=7741 RepID=UPI000947B2C8
2	17543625	17576535	acetyl-coenzyme A synthetase n=1 Tax=Crassostrea gigas TaxID=29159 RepID=UPI00148A9237
2	17544124		2_17544124	0	0.4968	0.46	-0.0417	0.71564
2	17546283		2_17546283	0	0.4998	0.49	-0.0011	0.31486
2	19208006	19213554	perlucin-like protein n=1 Tax=Pecten maximus TaxID=6579 RepID=UPI0014584EB6
2	19209251		2_19209251	0.02	0.273219	0.163265	0.0163	0.129222
2	19212417		2_19212417	0	0.255	0.15	-0.042	0.77341
2	20930909	20934934	Profilin n=2 Tax=Crassostrea TaxID=6564 RepID=K1R8B8_CRAGI
2	20933371		2_20933371	0.16	0.492914	0.440476	-0.0396	0.790758
2	20933896		2_20933896	0.18	0.414039	0.292683	0.0106	0.157698
2	20980281	21006814	Heat shock 70 kDa protein n=2 Tax=Mizuhopecten yessoensis TaxID=6573 RepID=A0A1C9U318_MIZYE
2	20986299		2_20986299	0	0.4968	0.46	-0.0031	0.270348
2	20987959		2_20987959	0	0.3078	0.19	0.0291	0.144052
2	21547772	21566977	S-methyl-5-thioadenosine phosphorylase-like n=1 Tax=Mizuhopecten yessoensis TaxID=6573 RepID=UPI000B45DF7F
2	21549035		2_21549035	0	0.495	0.45	-0.0294	0.871398
2	21553108		2_21553108	0	0.4992	0.48	0.052	0.059372
2	22015395	22040660	ATP-binding cassette sub-family D member 3 n=4 Tax=Crassostrea TaxID=6564 RepID=K1Q8P4_CRAGI
2	22023925		2_22023925	0	0.495	0.45	-0.0012	0.367484
2	22030119		2_22030119	0	0.48	0.4	-0.0082	0.569862
2	22637126	22662514	Tctex1 domain-containing protein 1 n=3 Tax=Pectinidae TaxID=6566 RepID=A0A210PWG5_MIZYE
2	22660924		2_22660924	0	0.4902	0.43	-0.0339	0.902254
2	22661315		2_22661315	0	0.4758	0.39	-0.0349	0.80954
2	24788938	24808460	Serine palmitoyltransferase-1 n=2 Tax=Crassostrea TaxID=6564 RepID=S4SCW4_CRAGI
2	24806853		2_24806853	0	0.4928	0.44	0.137	0.00388
2	24808250		2_24808250	0	0.4968	0.46	-0.0151	0.688184
2	25766303	25772544	Peroxin-13 n=3 Tax=Crassostrea gigas TaxID=29159 RepID=K1PNM8_CRAGI
2	25768068		2_25768068	0	0.4998	0.49	-0.022	0.714424
2	25768101		2_25768101	0	0.4968	0.46	-0.0333	0.935216
2	26019143	26077765	WD repeat-containing protein 63 n=8 Tax=Crassostrea TaxID=6564 RepID=K1QAU3_CRAGI
2	26040754		2_26040754	0	0.4032	0.28	0.0534	0.056484
2	26041128		2_26041128	0	0.4902	0.43	0.0114	0.215846
2	26589617	26599785	Methylthioribose-1-phosphate isomerase n=1 Tax=Mizuhopecten yessoensis TaxID=6573 RepID=A0A210PEH8_MIZYE
2	26593430		2_26593430	0	0.4488	0.34	-0.0126	0.407468
2	26596734		2_26596734	0	0.3648	0.24	-0.0361	1
2	26942856	26943558	RNA-directed DNA polymerase from mobile element jockey (Fragment) n=1 Tax=Lygus hesperus TaxID=30085 RepID=A0A0A9Z814_LYGHE
2	27576914	27584289	DNA polymerase III polC-type n=2 Tax=Crassostrea gigas TaxID=29159 RepID=K1Q962_CRAGI
2	27578030		2_27578030	0	0.4032	0.28	0.0009	0.21851
2	27578034		2_27578034	0	0.4998	0.49	0.0158	0.184542
2	28248315	28264406	Zinc transporter 7 n=2 Tax=Pectinidae TaxID=6566 RepID=A0A210R0B6_MIZYE
2	28249864		2_28249864	0	0.4712	0.38	-0.0136	0.485928
2	28260362		2_28260362	0	0.48	0.4	-0.025	0.727558
2	30065790	30085886	Putative low-density lipoprotein receptor (Fragment) n=5 Tax=Parasteatoda tepidariorum TaxID=114398 RepID=A0A2L2XZZ0_PARTP
2	30066551		2_30066551	0	0.4968	0.46	-0.0124	0.788014
2	30076635		2_30076635	0	0.4488	0.34	-0.0091	0.546394
2	30200247	30213504	Kyphoscoliosis peptidase n=15 Tax=Crassostrea TaxID=6564 RepID=K1PD13_CRAGI
2	30202079		2_30202079	0	0.4278	0.31	-0.0105	0.553462
2	30202427		2_30202427	0	0.4712	0.38	0.1063	0.010972
2	31815632	31897235	LOW QUALITY PROTEIN: uncharacterized protein LOC111119482 n=1 Tax=Crassostrea virginica TaxID=6565 RepID=UPI000BAF9E52
2	31819132		2_31819132	0	0.4758	0.39	0.1166	0.00458
2	31820629		2_31820629	0	0.4982	0.47	0.157	0.001498
2	32401317	32474381	Protein phosphatase 1 regulatory subunit 42 n=16 Tax=Pectinidae TaxID=6566 RepID=A0A210R0A2_MIZYE
2	32409907		2_32409907	0	0.5	0.5	-0.0183	0.78697
2	32414550		2_32414550	0	0.2952	0.18	-0.0078	0.407576
2	32849223	32874773	serine/threonine-protein kinase WNK-like n=1 Tax=Acropora millepora TaxID=45264 RepID=UPI0010FC95CC
2	32856679		2_32856679	0.04	0.451172	0.34375	-0.0311	0.858488
2	32861432		2_32861432	0.02	0.499792	0.489796	-0.0262	0.733418
2	34767384	34789969	Type I protein arginine methyltransferase n=5 Tax=Crassostrea TaxID=6564 RepID=K1PNU2_CRAGI
2	34775931		2_34775931	0	0.4968	0.46	-0.0192	0.904014
2	34778737		2_34778737	0	0.4998	0.49	0.0237	0.226108
2	34913680	34928668	Poly endoribonuclease-c-like-specific (Fragment) n=2 Tax=Mytilus galloprovincialis TaxID=29158 RepID=A0A3L5TTA2_MYTGA
2	34923219		2_34923219	0	0.3078	0.19	0.004	0.292866
2	34924809		2_34924809	0	0.4902	0.43	0.0168	0.246822
2	35678399	35698233	RING finger protein 11 n=2 Tax=Pectinidae TaxID=6566 RepID=A0A210PHF0_MIZYE
2	35696275		2_35696275	0.02	0.424823	0.306122	0.0074	0.20628
2	35697249		2_35697249	0.06	0.491852	0.43617	0.009	0.233156
2	36753594	36776246	LOW QUALITY PROTEIN: inositol phosphoceramide mannosyltransferase 2-like n=1 Tax=Pomacea canaliculata TaxID=400727 RepID=UPI000D737F14
2	36754167		2_36754167	0.18	0.232302	0.134146	-0.0019	0.499316
2	38281687	38305838	7-dehydrocholesterol reductase-like n=1 Tax=Crassostrea virginica TaxID=6565 RepID=UPI000BAEC26F
2	38283214		2_38283214	0	0.4992	0.48	-0.022	0.46088
2	38283487		2_38283487	0	0.4902	0.43	0.0205	0.111088
2	38522665	38535621	Regulator of chromosome condensation n=2 Tax=Pectinidae TaxID=6566 RepID=A0A210PHE8_MIZYE
2	38523669		2_38523669	0	0.1302	0.07	0.0215	0.179902
2	38523750		2_38523750	0	0.4992	0.48	0.0758	0.031206
2	40037905	40071507	non-specific lipid-transfer protein-like n=1 Tax=Pecten maximus TaxID=6579 RepID=UPI001458E02A
2	40039593		2_40039593	0.04	0.5	0.5	0.0725	0.029122
2	40071070		2_40071070	0	0.3542	0.23	0.0798	0.037458
2	40662196	40676685	zinc finger protein 260-like n=1 Tax=Xiphophorus maculatus TaxID=8083 RepID=UPI000C6D0672
2	40664796		2_40664796	0	0.4992	0.48	-0.0124	0.398016
2	40670405		2_40670405	0	0.4422	0.33	0.0194	0.13763
2	42474763	42498604	Eukaryotic translation initiation factor 2D n=6 Tax=Crassostrea gigas TaxID=29159 RepID=K1QFD1_CRAGI
2	42483062		2_42483062	0	0.4902	0.43	-0.0265	0.966148
2	42488258		2_42488258	0	0.455	0.35	0.0056	0.328
2	44320180	44347313	Thimet oligopeptidase n=2 Tax=Mizuhopecten yessoensis TaxID=6573 RepID=A0A210PNW1_MIZYE
2	44323669		2_44323669	0.22	0.435569	0.320513	0.1363	0.002956
2	44332011		2_44332011	0	0.4352	0.32	0.0493	0.057528
2	45477194	45563780	Apolipophorin n=4 Tax=Mizuhopecten yessoensis TaxID=6573 RepID=A0A210PJU9_MIZYE
2	45553560		2_45553560	0.06	0.488909	0.425532	-0.0181	0.836058
2	45554352		2_45554352	0	0.3542	0.23	-0.0144	0.422994
2	45858350	45869782	cell division cycle protein 20 homolog n=1 Tax=Lingula unguis TaxID=7574 RepID=A0A1S3JGW5_LINUN
2	45859342		2_45859342	0	0.4982	0.47	-0.0117	0.454578
2	45859660		2_45859660	0	0.4758	0.39	-0.017	0.608766
2	46976543	46996783	Cytochrome P450 10 n=3 Tax=Pectinidae TaxID=6566 RepID=A0A210R1U6_MIZYE
2	46978800		2_46978800	0.06	0.481666	0.404255	-0.0016	0.227822
2	46993000		2_46993000	0.04	0.437283	0.322917	-0.0362	1
2	47770150	47781872	Cytochrome c heme lyase n=2 Tax=Crassostrea gigas TaxID=29159 RepID=K1PBV7_CRAGI
2	47781060		2_47781060	0	0.4662	0.37	-0.0355	1
2	47781355		2_47781355	0	0.4662	0.37	-0.0224	0.80275
2	48661517	48702724	Glycine cleavage system P protein n=3 Tax=Pectinidae TaxID=6566 RepID=A0A210QF92_MIZYE
2	48679074		2_48679074	0	0.4662	0.37	-0.0236	0.898848
2	48680620		2_48680620	0	0.4872	0.42	-0.0319	0.90177
2	49196636	49216049	nucleolar GTP-binding protein 2-like n=1 Tax=Pecten maximus TaxID=6579 RepID=UPI0014585848
2	49202093		2_49202093	0	0.32	0.2	-0.0269	0.858064
2	49204772		2_49204772	0	0.4998	0.49	0.0067	0.3169
2	50014141	50036346	Protein DEK n=1 Tax=Araneus ventricosus TaxID=182803 RepID=A0A4Y2LRE2_ARAVE
2	50014931		2_50014931	0	0.4422	0.33	-0.0197	0.92547
2	50015023		2_50015023	0	0.4902	0.43	-0.0054	0.505192
2	50304009	50333451	Vasculin n=4 Tax=Pectinidae TaxID=6566 RepID=A0A210R0B8_MIZYE
2	50304458		2_50304458	0	0.3542	0.23	0.0216	0.16451
2	50326537		2_50326537	0	0.4608	0.36	0.0231	0.189056
2	53108546	53136856	Hydroxysteroid dehydrogenase-like protein 2 n=2 Tax=Pectinidae TaxID=6566 RepID=A0A210PNN3_MIZYE
2	53110542		2_53110542	0	0.4902	0.43	0.0513	0.062262
2	53112725		2_53112725	0	0.4998	0.49	-0.0168	0.5259
2	55244911	55260746	prolyl 3-hydroxylase OGFOD1-like n=1 Tax=Aplysia californica TaxID=6500 RepID=UPI000359E007
2	55252142		2_55252142	0	0.2688	0.16	-0.0251	0.834712
2	55257516		2_55257516	0	0.2408	0.14	0.0283	0.155446
2	56047169	56057340	pancreatic triacylglycerol lipase-like n=1 Tax=Crassostrea virginica TaxID=6565 RepID=UPI000BAFB217
2	56050499		2_56050499	0.08	0.488422	0.423913	-0.0038	0.299954
2	56051941		2_56051941	0.08	0.499764	0.48913	0.1351	0.004706
3	827298	835052	betaine--homocysteine S-methyltransferase 1-like isoform X2 n=2 Tax=Crassostrea virginica TaxID=6565 RepID=UPI000BAF2C18
3	827694		3_827694	0	0.455	0.35	-0.0265	0.8626
3	830623		3_830623	0	0.4902	0.43	0.008	0.273132
3	1032734	1075179	Beta-N-acetylhexosaminidase n=1 Tax=Mizuhopecten yessoensis TaxID=6573 RepID=A0A210PW89_MIZYE
3	1052428		3_1052428	0	0.4758	0.39	-0.0017	0.33383
3	1056103		3_1056103	0	0.4662	0.37	0.0217	0.21392
3	1525588	1531364	methylated-DNA--protein-cysteine methyltransferase-like n=1 Tax=Crassostrea virginica TaxID=6565 RepID=UPI000BAE7AA2
3	1527552		3_1527552	0	0.1638	0.09	-0.0366	0.751782
3	1529289		3_1529289	0	0.2112	0.12	-0.0245	0.792428
3	4313430	4328527	Eukaryotic peptide chain release factor GTP-binding subunit ERF3B n=3 Tax=Crassostrea TaxID=6564 RepID=K1RCY7_CRAGI
3	4325497		3_4325497	0	0.4998	0.49	-0.0303	0.790742
3	4328109		3_4328109	0	0.5	0.5	0.2005	0.000132
3	5321406	5329197	Sorbitol dehydrogenase n=2 Tax=Mizuhopecten yessoensis TaxID=6573 RepID=A0A210PEV5_MIZYE
3	5325617		3_5325617	0.06	0.119511	0.0638298	-0.0231	0.568566
3	5328795		3_5328795	0.06	0.34699	0.223404	-0.0093	0.659012
3	9746494	9759792	lysosomal acid lipase/cholesteryl ester hydrolase-like n=1 Tax=Pecten maximus TaxID=6579 RepID=UPI001458DA67
3	9750988		3_9750988	0	0.4982	0.47	-0.0206	0.738246
3	9753119		3_9753119	0	0.3942	0.27	0.0601	0.056802
3	10336682	10386459	3-phosphoadenosine-5-phosphosulfate synthase n=11 Tax=Crassostrea TaxID=6564 RepID=K1R185_CRAGI
3	10384001		3_10384001	0	0.4968	0.46	-0.0154	0.711922
3	10384040		3_10384040	0	0.4968	0.46	-0.0154	0.710096
3	12277224	12292944	Solute carrier family 22 member 21 n=4 Tax=Crassostrea gigas TaxID=29159 RepID=K1Q014_CRAGI
3	12292738		3_12292738	0.02	0.199292	0.112245	-0.0211	0.781046
3	12495388	12526137	lysosomal alpha-glucosidase-like n=1 Tax=Octopus vulgaris TaxID=6645 RepID=UPI00114107BB
3	12498899		3_12498899	0	0.3542	0.23	0.0211	0.196666
3	12504155		3_12504155	0	0.4872	0.42	0.1313	0.006022
3	13644631	13693325	receptor-type tyrosine-protein phosphatase mu-like n=1 Tax=Crassostrea gigas TaxID=29159 RepID=UPI00148A3653
3	13645787		3_13645787	0	0.4998	0.49	-0.0198	0.431102
3	13685002		3_13685002	0.08	0.15879	0.0869565	-0.0167	0.523286
3	13958037	13963507	C1q-related factor n=3 Tax=Mizuhopecten yessoensis TaxID=6573 RepID=A0A210Q8I7_MIZYE
3	13960779		3_13960779	0	0.4982	0.47	0.2622	1e-05
3	13960905		3_13960905	0.04	0.46875	0.375	0.0298	0.0962
3	14221672	14234789	putative gamma-glutamylcyclotransferase CG2811 isoform X1 n=2 Tax=Penaeus vannamei TaxID=6689 RepID=UPI000F660E42
3	14224737		3_14224737	0	0.4712	0.38	-0.0184	0.511358
3	14228016		3_14228016	0	0.4998	0.49	-0.0313	0.967142
3	16778243	16796660	Helicase C-terminal domain-containing protein n=1 Tax=Arion vulgaris TaxID=1028688 RepID=A0A0B6ZWL7_9EUPU
3	16794957		3_16794957	0	0.2822	0.17	-0.0023	0.436198
3	16796200		3_16796200	0	0.4928	0.44	-0.0216	0.598332
3	16996454	17018486	Elongation of very long chain fatty acids protein n=1 Tax=Mizuhopecten yessoensis TaxID=6573 RepID=A0A210PDK9_MIZYE
3	17014357		3_17014357	0	0.3942	0.27	-0.0166	0.601968
3	17016506		3_17016506	0	0.3318	0.21	-0.0574	0.952714
3	17599103	17604491	L-xylulose reductase-like n=1 Tax=Pecten maximus TaxID=6579 RepID=UPI0014583CE6
3	17642119	17688117	LOW QUALITY PROTEIN: DC-STAMP domain-containing protein 2-like n=1 Tax=Crassostrea virginica TaxID=6565 RepID=UPI000BAFD80A
3	17650016		3_17650016	0	0.4982	0.47	-0.0377	1
3	17650020		3_17650020	0	0.4968	0.46	-0.0364	1
3	17798953	17833059	cytochrome P450 2B4-like n=1 Tax=Pomacea canaliculata TaxID=400727 RepID=UPI000D72AA42
3	17799314		3_17799314	0	0.495	0.45	-0.0361	0.764826
3	17799337		3_17799337	0	0.4928	0.44	0.0103	0.217256
3	18549449	18562333	serine/threonine-protein kinase 19-like n=1 Tax=Pecten maximus TaxID=6579 RepID=UPI0014585411
3	18550686		3_18550686	0	0.4712	0.38	-0.0264	0.930988
3	18556108		3_18556108	0	0.3432	0.22	-0.0245	0.863888
3	19052747	19066484	Serine-enriched protein n=1 Tax=Mizuhopecten yessoensis TaxID=6573 RepID=A0A210QAG2_MIZYE
3	19061729		3_19061729	0	0.4902	0.43	-0.0335	0.872396
3	19061757		3_19061757	0	0.5	0.5	-0.0209	0.60117
3	20116117	20161112	coiled-coil domain-containing protein 33-like isoform X1 n=2 Tax=Pecten maximus TaxID=6579 RepID=UPI001458B741
3	20116645		3_20116645	0	0.3432	0.22	-0.0294	0.954174
3	20116728		3_20116728	0	0.4992	0.48	0.0396	0.087542
3	20898750	20924434	Interferon regulatory factor 2 n=1 Tax=Hyriopsis cumingii TaxID=165450 RepID=F6LQK2_HYRCU
3	20899704		3_20899704	0	0.495	0.45	-0.037	1
3	20901439		3_20901439	0	0.4488	0.34	-0.0333	0.963046
3	21348308	21369919	RING finger protein unkempt homolog isoform X1 n=13 Tax=Crassostrea TaxID=6564 RepID=UPI000BAF2C04
3	21348554		3_21348554	0	0.4968	0.46	-0.0285	0.846108
3	21351133		3_21351133	0	0.5	0.5	-0.0222	0.648362
3	22390927	22454646	WD repeat domain phosphoinositide-interacting protein 2 n=1 Tax=Lottia gigantea TaxID=225164 RepID=V4AIJ2_LOTGI
3	22403787		3_22403787	0	0.455	0.35	0.019	0.173494
3	22415296		3_22415296	0	0.3432	0.22	0.0384	0.1109
3	23664067	23690940	glutamyl aminopeptidase-like n=1 Tax=Crassostrea virginica TaxID=6565 RepID=UPI000BAF7D39
3	23679317		3_23679317	0.12	0.493543	0.443182	-0.0066	0.285218
3	23681913		3_23681913	0.12	0.493543	0.443182	0.0296	0.122988
3	24166010	24237234	peroxisomal 2,4-dienoyl-CoA reductase n=1 Tax=Crassostrea gigas TaxID=29159 RepID=UPI0005C36E44
3	24175134		3_24175134	0	0.3648	0.24	0.0304	0.155034
3	24176399		3_24176399	0	0.495	0.45	0.0355	0.17349
3	24300781	24305441	C1q n=1 Tax=Sinonovacula constricta TaxID=98310 RepID=A0A4P8DYJ0_SINCO
3	24303262		3_24303262	0.2	0.43875	0.325	0.0688	0.052168
3	24305231		3_24305231	0	0.4838	0.41	-0.0081	0.535622
3	24307750	24313861	NAD-dependent protein deacetylase Sirt6-like n=2 Tax=Lingula unguis TaxID=7574 RepID=A0A1S3H3K6_LINUN
3	24310347		3_24310347	0	0.4872	0.42	-0.0268	0.73189
3	24313048		3_24313048	0	0.5	0.5	-0.0241	0.736686
3	24331432	24343704	Ovochymase-1 n=2 Tax=Mizuhopecten yessoensis TaxID=6573 RepID=A0A210QS89_MIZYE
3	24341167		3_24341167	0.28	0.486111	0.416667	-0.0472	0.948866
3	24342216		3_24342216	0.3	0.382041	0.257143	0.0619	0.147128
3	26160831	26190509	Putative zyg-1-like serine/threonine protein kinase (Fragment) n=3 Tax=Ornithodoros TaxID=6937 RepID=A0A2R5L7Q3_9ACAR
3	26176643		3_26176643	0	0.4902	0.43	-0.0222	0.621258
3	26188137		3_26188137	0	0.4872	0.42	0.0812	0.019122
3	26863176	26879576	FA_desaturase domain-containing protein n=1 Tax=Pomacea canaliculata TaxID=400727 RepID=A0A2T7PYW6_POMCA
3	26873342		3_26873342	0	0.18	0.1	0.1377	0.001202
3	26879035		3_26879035	0	0.5	0.5	-0.007	0.379192
3	27805240	27815583	phosphomannomutase n=1 Tax=Crassostrea gigas TaxID=29159 RepID=UPI0005C36952
3	27805604		3_27805604	0	0.495	0.45	-0.0259	0.90255
3	28408808	28453521	probable E3 ubiquitin-protein ligase HERC4 n=1 Tax=Crassostrea virginica TaxID=6565 RepID=UPI000BAEB843
3	28409793		3_28409793	0	0.455	0.35	0.0876	0.016572
3	28415984		3_28415984	0	0.4488	0.34	0.1264	0.004296
3	29093970	29172201	Metalloendopeptidase n=2 Tax=Pectinidae TaxID=6566 RepID=A0A210QJ12_MIZYE
3	29103787		3_29103787	0	0.4968	0.46	-0.0177	0.69067
3	29103798		3_29103798	0	0.4968	0.46	-0.0177	0.689606
3	30445209	30499554	Solute carrier family 15 member 4 n=1 Tax=Mizuhopecten yessoensis TaxID=6573 RepID=A0A210PV75_MIZYE
3	30445732		3_30445732	0	0.4872	0.42	-0.0025	0.3765
3	30445907		3_30445907	0	0.48	0.4	0.0229	0.156034
3	33563403	33578800	RNA helicase n=2 Tax=Takifugu TaxID=31032 RepID=A0A5C6NSB5_9TELE
3	33568023		3_33568023	0	0.4118	0.29	0.0886	0.0137
3	33575900		3_33575900	0	0.4928	0.44	-0.0185	0.683698
3	33950841	33970485	thymidine kinase 2, mitochondrial-like n=1 Tax=Crassostrea virginica TaxID=6565 RepID=UPI000BB05A0F
3	33951973		3_33951973	0	0.1638	0.09	0.0087	0.300804
3	33959748		3_33959748	0.02	0.496668	0.459184	0.0503	0.089474
3	34550315	34566977	Signal recognition particle subunit SRP68 n=1 Tax=Biomphalaria glabrata TaxID=6526 RepID=A0A2C9JFV8_BIOGL
3	34554316		3_34554316	0	0.4982	0.47	0.0456	0.070428
3	34554322		3_34554322	0	0.4902	0.43	0.0106	0.272382
3	34569686	34577213	LOW QUALITY PROTEIN: pyrimidine-specific ribonucleoside hydrolase RihA-like n=1 Tax=Pecten maximus TaxID=6579 RepID=UPI001458C2BE
3	34571386		3_34571386	0	0.3942	0.27	0.0389	0.106636
3	34572013		3_34572013	0	0.42	0.3	-0.0181	0.547566
3	34831097	34866065	Glutamate-rich WD repeat-containing protein 1 n=2 Tax=Mizuhopecten yessoensis TaxID=6573 RepID=A0A210QGC0_MIZYE
3	34850555		3_34850555	0	0.4872	0.42	-0.0159	0.600886
3	34850629		3_34850629	0	0.495	0.45	-0.0386	0.934836
3	34869727	34885557	caspase-3-like isoform X1 n=2 Tax=Pomacea canaliculata TaxID=400727 RepID=UPI000D7313B2
3	34869951		3_34869951	0	0.5	0.5	-0.0183	0.788444
3	34870085		3_34870085	0	0.4998	0.49	-0.0362	0.935182
3	36060751	36083124	mitochondrial import inner membrane translocase subunit Tim23-like n=1 Tax=Strongylocentrotus purpuratus TaxID=7668 RepID=UPI0010C72EDE
3	36061958		3_36061958	0	0.4992	0.48	-0.0123	0.564992
3	36061980		3_36061980	0	0.4982	0.47	-0.0152	0.695116
3	37415267	37425737	Serine protease n=1 Tax=Hyriopsis cumingii TaxID=165450 RepID=D2KKK2_HYRCU
3	37421886		3_37421886	0	0.48	0.4	0.0022	0.322082
3	37423401		3_37423401	0	0.48	0.4	0.0862	0.017412
3	37527208	37538530	enoyl-CoA hydratase, mitochondrial-like n=1 Tax=Pecten maximus TaxID=6579 RepID=UPI001458EB0F
3	37541250	37570505	Serine/threonine-protein kinase pats1 n=2 Tax=Mizuhopecten yessoensis TaxID=6573 RepID=A0A210PZ49_MIZYE
3	37544151		3_37544151	0	0.4278	0.31	0.0311	0.159234
3	37545994		3_37545994	0.04	0.473741	0.385417	0.0352	0.102562
3	39555588	39571421	Uromodulin n=1 Tax=Crassostrea gigas TaxID=29159 RepID=K1PD19_CRAGI
3	41162009	41196877	3-hydroxyacyl-[acyl-carrier-protein] dehydratase n=3 Tax=Lingula unguis TaxID=7574 RepID=A0A1S3JDA3_LINUN
3	41163591		3_41163591	0.04	0.482422	0.40625	0.0192	0.183816
3	41173601		3_41173601	0.04	0.473741	0.385417	-0.0331	0.962252
3	42898853	42994812	Hexosyltransferase n=1 Tax=Lottia gigantea TaxID=225164 RepID=V4AYB7_LOTGI
3	42901711		3_42901711	0	0.4992	0.48	-0.0152	0.71268
3	42902557		3_42902557	0	0.48	0.4	0.0051	0.29268
3	43207694	43237412	sodium/calcium exchanger 3-like isoform X1 n=2 Tax=Pecten maximus TaxID=6579 RepID=UPI00145911A9
3	43234310		3_43234310	0	0.3078	0.19	-0.0158	0.519958
3	43234313		3_43234313	0	0.3078	0.19	-0.0158	0.523198
3	43411224	43463880	AN1-type zinc finger protein 4 n=2 Tax=Pectinidae TaxID=6566 RepID=A0A210PN22_MIZYE
3	43413429		3_43413429	0	0.4278	0.31	-0.0299	1
3	43413466		3_43413466	0	0.42	0.3	0.1381	0.001234
3	46613145	46650241	chitotriosidase-1 n=1 Tax=Lingula unguis TaxID=7574 RepID=A0A1S3IXN4_LINUN
3	47010294	47017346	methyltransferase-like protein 27 n=1 Tax=Pecten maximus TaxID=6579 RepID=UPI001458574E
3	47010889		3_47010889	0	0.32	0.2	-0.0115	0.434522
3	47011140		3_47011140	0	0.4872	0.42	-0.014	0.502184
3	47961861	47968043	ER lumen protein-retaining receptor n=1 Tax=Lingula unguis TaxID=7574 RepID=A0A1S3IFQ6_LINUN
3	47962474		3_47962474	0	0.4968	0.46	-0.0111	0.60057
3	47963270		3_47963270	0	0.4872	0.42	-0.0194	0.640524
3	48680099	48687692	VWFA domain-containing protein n=1 Tax=Arion vulgaris TaxID=1028688 RepID=A0A0B7A309_9EUPU
3	48684240		3_48684240	0.12	0.46875	0.375	-0.0543	0.959228
3	48684324		3_48684324	0.1	0.470123	0.377778	-0.0198	0.508018
3	49244359	49257245	eukaryotic translation initiation factor 4E-like isoform X1 n=2 Tax=Crassostrea virginica TaxID=6565 RepID=UPI000BAF8BE8
3	49245259		3_49245259	0	0.455	0.35	-0.0199	0.660898
3	49245260		3_49245260	0	0.455	0.35	-0.0199	0.668694
3	51036435	51046182	Aquaporin 8 n=1 Tax=Sinonovacula constricta TaxID=98310 RepID=A0A6G6CZ46_SINCO
3	51039677		3_51039677	0	0.4032	0.28	-0.0316	0.960346
3	51039684		3_51039684	0	0.4608	0.36	-0.0244	0.750294
3	52896881	52915334	Cellular nucleic acid-binding protein n=1 Tax=Hydra vulgaris TaxID=6087 RepID=T2MEN6_HYDVU
3	52907490		3_52907490	0	0.32	0.2	-0.0082	0.596386
3	52908816		3_52908816	0	0.4608	0.36	0.0027	0.356274
3	52946165	52978875	ATP-binding cassette sub-family G member 2 n=6 Tax=Crassostrea gigas TaxID=29159 RepID=K1PDP9_CRAGI
3	52946464		3_52946464	0	0.4998	0.49	-0.0079	0.44113
3	52962806		3_52962806	0	0.48	0.4	-0.0197	0.636874
3	54280071	54289619	zinc finger CCHC domain-containing protein 7 n=1 Tax=Calidris pugnax TaxID=198806 RepID=UPI00071C3849
3	54288769		3_54288769	0	0.4982	0.47	-0.0112	0.668514
3	54288810		3_54288810	0	0.4872	0.42	-0.0082	0.47879
3	54293751	54349545	D-beta-hydroxybutyrate dehydrogenase, mitochondrial n=1 Tax=Crassostrea gigas TaxID=29159 RepID=UPI0005C374E6
3	54318177		3_54318177	0	0.4278	0.31	0.013	0.234478
3	54318245		3_54318245	0	0.4968	0.46	-0.0233	0.76109
4	403335	442644	ATP-dependent RNA helicase HAS1-like isoform X1 n=2 Tax=Pecten maximus TaxID=6579 RepID=UPI0014587088
4	405137		4_405137	0	0.4662	0.37	0.0074	0.313502
4	405146		4_405146	0	0.4872	0.42	0.0029	0.394304
4	855405	869945	Ankyrin repeat domain-containing protein 50 n=1 Tax=Mizuhopecten yessoensis TaxID=6573 RepID=A0A210Q002_MIZYE
4	861237		4_861237	0	0.4712	0.38	-0.0328	0.866888
4	867793		4_867793	0	0.3318	0.21	-0.0048	0.463862
4	2248614	2259143	Thioredoxin domain-containing protein n=5 Tax=Octopodidae TaxID=6647 RepID=A0A0L8G3T7_OCTBM
4	2250541		4_2250541	0	0.4968	0.46	-0.0031	0.46791
4	2251384		4_2251384	0	0.4968	0.46	0.0585	0.048042
4	2340558	2350898	Interleukin-1 receptor-associated kinase 1-binding protein 1 n=2 Tax=Pectinidae TaxID=6566 RepID=A0A210Q587_MIZYE
4	2345739		4_2345739	0	0.4422	0.33	-0.0088	0.48498
4	2346401		4_2346401	0	0.4928	0.44	-0.0037	0.413104
4	2797104	2850913	Poly [ADP-ribose] polymerase n=2 Tax=Crassostrea gigas TaxID=29159 RepID=K1Q831_CRAGI
4	2808110		4_2808110	0.06	0.494341	0.446809	0.0389	0.06988
4	2808166		4_2808166	0.04	0.353299	0.229167	-0.0057	0.298936
4	8815484	8844485	Catalase n=1 Tax=Mactra quadrangularis TaxID=120570 RepID=A0A3S8TII7_9BIVA
4	8818485		4_8818485	0	0.48	0.4	-0.0064	0.497752
4	8827819		4_8827819	0	0.3318	0.21	-0.0105	0.538922
4	10546417	10561365	SRP40_C domain-containing protein (Fragment) n=1 Tax=Clastoptera arizonana TaxID=38151 RepID=A0A1B6CK23_9HEMI
4	10547063		4_10547063	0	0.4902	0.43	-0.0177	0.663808
4	10548842		4_10548842	0	0.4982	0.47	-0.0085	0.445896
4	16429754	16449660	CTP synthase n=5 Tax=Crassostrea TaxID=6564 RepID=K1R0P8_CRAGI
4	16449356		4_16449356	0.24	0.387812	0.263158	-0.0148	0.423344
4	16449360		4_16449360	0.26	0.394449	0.27027	-0.0227	0.628664
4	18183882	18192895	sn1-specific diacylglycerol lipase alpha-like isoform X1 n=5 Tax=Pectinidae TaxID=6566 RepID=UPI000B458983
4	19909309	19932559	betaine--homocysteine S-methyltransferase 1-like isoform X1 n=4 Tax=Pecten maximus TaxID=6579 RepID=UPI001458D184
4	19923010		4_19923010	0.08	0.446834	0.336957	-0.0042	0.38381
4	19924495		4_19924495	0.12	0.456353	0.352273	-0.0042	0.446514
4	21511226	21515528	Glucose dehydrogenase [acceptor] n=1 Tax=Mizuhopecten yessoensis TaxID=6573 RepID=A0A210Q8G7_MIZYE
4	21512809		4_21512809	0.1	0.32	0.2	-0.0329	0.88601
4	21512999		4_21512999	0.08	0.340265	0.217391	-0.0234	0.759996
4	24576631	24580851	serine protease inhibitor dipetalogastin-like isoform X1 n=2 Tax=Aphantopus hyperantus TaxID=111886 RepID=UPI0015696067
4	24686227	24697309	Methylosome protein 50 n=1 Tax=Mizuhopecten yessoensis TaxID=6573 RepID=A0A210Q8G3_MIZYE
4	24688662		4_24688662	0	0.4352	0.32	0.018	0.179452
4	24689272		4_24689272	0	0.4838	0.41	-0.0165	0.59342
4	24833073	24842835	Carboxylic ester hydrolase n=2 Tax=Mizuhopecten yessoensis TaxID=6573 RepID=A0A210R503_MIZYE
4	24841248		4_24841248	0	0.4422	0.33	-0.0386	0.711756
4	24842648		4_24842648	0	0.4488	0.34	-0.0048	0.321718
4	24844063	24855955	neuroligin-4, X-linked-like n=1 Tax=Pecten maximus TaxID=6579 RepID=UPI001458BFD9
4	24845133		4_24845133	0	0.4872	0.42	0.0113	0.235504
4	24845149		4_24845149	0	0.48	0.4	-0.0001	0.35018
4	24931567	24935637	Glucose dehydrogenase [acceptor] n=1 Tax=Mizuhopecten yessoensis TaxID=6573 RepID=A0A210Q8G7_MIZYE
4	24933043		4_24933043	0.2	0.18	0.1	-0.0167	0.28016
4	24934770		4_24934770	0.14	0.42185	0.302326	-0.0542	1
4	27020333	27041793	BTB domain-containing protein n=4 Tax=Pomacea canaliculata TaxID=400727 RepID=A0A2T7P555_POMCA
4	27024967		4_27024967	0	0.32	0.2	0.0886	0.02018
4	27025096		4_27025096	0	0.4992	0.48	-0.0261	0.81959
4	27755454	27811667	organic cation transporter protein-like n=2 Tax=Crassostrea virginica TaxID=6565 RepID=UPI000BB08B79
4	27769524		4_27769524	0	0.4662	0.37	-0.0128	0.502974
4	27810767		4_27810767	0	0.4662	0.37	0.0189	0.173248
4	28598942	28615737	D-galactoside-specific lectin n=2 Tax=Mizuhopecten yessoensis TaxID=6573 RepID=A0A210QDU7_MIZYE
4	28600101		4_28600101	0.02	0.499792	0.489796	0.0259	0.107528
4	28607172		4_28607172	0	0.4872	0.42	-0.0308	0.706576
4	29085679	29093454	Phospholipase A2 n=1 Tax=Lottia gigantea TaxID=225164 RepID=V4B4S7_LOTGI
4	29088195		4_29088195	0	0.4838	0.41	-0.0314	0.809776
4	29089913		4_29089913	0.02	0.166805	0.0918367	-0.0447	1
4	29325202	29331292	yrdC domain-containing protein, mitochondrial-like n=2 Tax=Crassostrea virginica TaxID=6565 RepID=UPI000BAEE0C2
4	29330047		4_29330047	0	0.4662	0.37	-0.0163	0.58167
4	29330304		4_29330304	0	0.455	0.35	-0.0301	0.801264
4	30477841	30505369	transaldolase isoform X1 n=6 Tax=Crassostrea TaxID=6564 RepID=UPI0005C3732C
4	30478246		4_30478246	0	0.3078	0.19	-0.016	0.54958
4	30478918		4_30478918	0	0.4928	0.44	-0.026	0.711702
4	30752190	30762296	dehydrodolichyl diphosphate synthase complex subunit nus1-like n=2 Tax=Pectinidae TaxID=6566 RepID=UPI0014584F7C
4	30755128		4_30755128	0	0.48	0.4	-0.0168	0.730144
4	30755177		4_30755177	0	0.48	0.4	-0.0086	0.458418
4	31276598	31295174	Cleavage stimulation factor 77 kDa subunit n=3 Tax=Crassostrea TaxID=6564 RepID=K1PMJ9_CRAGI
4	31280091		4_31280091	0	0.4608	0.36	-0.003	0.328508
4	31280614		4_31280614	0	0.4712	0.38	-0.0292	0.932578
4	33645139	33683006	IRS-type PTB domain-containing protein n=1 Tax=Pomacea canaliculata TaxID=400727 RepID=A0A2T7P444_POMCA
4	33661456		4_33661456	0	0.4488	0.34	0.0214	0.137136
4	33674069		4_33674069	0	0.4488	0.34	-0.0251	0.594336
4	34221826	34238770	myophilin-like isoform X1 n=2 Tax=Pecten maximus TaxID=6579 RepID=UPI001458CC49
4	34237314		4_34237314	0	0.4968	0.46	0.0568	0.073604
4	34237330		4_34237330	0	0.48	0.4	0.0514	0.067016
4	34280005	34328348	WD repeat and coiled-coil-containing protein-like isoform X1 n=5 Tax=Mizuhopecten yessoensis TaxID=6573 RepID=UPI000B45DEBA
4	34303776		4_34303776	0	0.4712	0.38	-0.0115	0.550174
4	34321931		4_34321931	0	0.4608	0.36	-0.0147	0.483944
4	34788184	34800307	periodic tryptophan protein 1 homolog n=1 Tax=Mizuhopecten yessoensis TaxID=6573 RepID=UPI000B45F2CF
4	34789968		4_34789968	0	0.4488	0.34	-0.0216	1
4	34795414		4_34795414	0	0.4608	0.36	-0.0089	0.531274
4	36456905	36475435	organic cation transporter protein-like n=2 Tax=Pecten maximus TaxID=6579 RepID=UPI001458A8D9
4	36458424		4_36458424	0	0.495	0.45	0.0094	0.324582
4	36458461		4_36458461	0	0.4928	0.44	0.0236	0.15288
4	39007884	39037245	placenta-specific gene 8 protein n=1 Tax=Crassostrea gigas TaxID=29159 RepID=UPI0005C3B569
4	39020916		4_39020916	0	0.4712	0.38	0.0357	0.078824
4	39021313		4_39021313	0	0.3078	0.19	0.0153	0.0786
4	39092501	39100058	cAMP and cAMP-inhibited cGMP 3,5-cyclic phosphodiesterase 10A-like n=1 Tax=Crassostrea virginica TaxID=6565 RepID=UPI000BB05760
4	39092652		4_39092652	0.28	0.46142	0.361111	-0.0633	0.951374
4	39095911		4_39095911	0.16	0.261621	0.154762	0.0853	0.034614
4	41078522	41090859	BHLH domain-containing protein n=1 Tax=Pomacea canaliculata TaxID=400727 RepID=A0A2T7P3N1_POMCA
4	41079455		4_41079455	0.18	0.46401	0.365854	-0.015	0.49593
4	41090015		4_41090015	0.26	0.463477	0.364865	0.0482	0.067764
4	41511314	41621971	multidrug resistance-associated protein 4-like isoform X2 n=3 Tax=Pecten maximus TaxID=6579 RepID=UPI001457F3FE
4	41534248		4_41534248	0	0.4838	0.41	0.0179	0.16965
4	41534275		4_41534275	0	0.4838	0.41	0.0179	0.172422
4	41631408	41723360	HIV Tat-specific factor 1 n=1 Tax=Mizuhopecten yessoensis TaxID=6573 RepID=A0A210PXW5_MIZYE
4	41635629		4_41635629	0	0.4662	0.37	0.0033	0.363872
4	41636538		4_41636538	0	0.455	0.35	0.0339	0.113406
4	42055968	42165570	CCT-beta n=4 Tax=Crassostrea TaxID=6564 RepID=K1R294_CRAGI
4	42150021		4_42150021	0	0.495	0.45	-0.0055	0.600426
4	42152024		4_42152024	0	0.48	0.4	-0.0144	0.704264
4	42317798	42397862	organic cation transporter protein-like n=2 Tax=Crassostrea virginica TaxID=6565 RepID=UPI000BB08B79
4	42362765		4_42362765	0	0.4712	0.38	-0.0361	0.965296
4	42362778		4_42362778	0	0.5	0.5	-0.0144	0.647334
4	44773388	44795378	Glycosyltransferase family 92 protein n=1 Tax=Lottia gigantea TaxID=225164 RepID=V3YX86_LOTGI
4	44782522		4_44782522	0	0.48	0.4	-0.0294	1
4	44790317		4_44790317	0	0.3318	0.21	0.0009	0.49337
4	45422690	45429908	apolipoprotein D-like n=1 Tax=Ctenocephalides felis TaxID=7515 RepID=UPI000E6E2EE8
4	45423046		4_45423046	0	0.4712	0.38	0.0918	0.01419
4	45428756		4_45428756	0	0.4998	0.49	0.0274	0.11987
4	45673011	45677432	dynein heavy chain 6, axonemal-like n=1 Tax=Pecten maximus TaxID=6579 RepID=UPI0014581856
4	45675241		4_45675241	0.02	0.459184	0.357143	-0.0363	0.862504
4	45675356		4_45675356	0	0.4608	0.36	-0.0194	0.64844
4	47194360	47207283	Organic cation transporter protein n=2 Tax=Crassostrea gigas TaxID=29159 RepID=K1PJJ4_CRAGI
4	47201212		4_47201212	0	0.4838	0.41	-0.029	0.870756
4	47201248		4_47201248	0	0.255	0.15	0.0053	0.376188
4	47399534	47409607	Zinc finger protein 593 n=2 Tax=Pectinidae TaxID=6566 RepID=A0A210QWK8_MIZYE
4	47405864		4_47405864	0.16	0.495465	0.452381	0.0397	0.052214
4	47408096		4_47408096	0	0.1302	0.07	-0.0268	0.6995
4	47838663	47966371	Protocadherin Fat 4 n=2 Tax=Mizuhopecten yessoensis TaxID=6573 RepID=A0A210QTB9_MIZYE
4	47838860		4_47838860	0	0.375	0.25	-0.0336	0.534746
4	47839025		4_47839025	0	0.4998	0.49	-0.0483	0.902518
4	47997412	47999167	Putative C1q domain containing protein MgC1q75 n=1 Tax=Mytilus galloprovincialis TaxID=29158 RepID=F0V4B2_MYTGA
4	49075142	49082487	neurogenic locus protein delta-like n=1 Tax=Crassostrea gigas TaxID=29159 RepID=UPI0005C3C1EC
4	49077551		4_49077551	0	0.4278	0.31	0.0163	0.283204
4	49077638		4_49077638	0	0.1128	0.06	-0.0207	0.570446
5	1743486	1773600	protein ABHD14B n=1 Tax=Lingula unguis TaxID=7574 RepID=A0A1S3J445_LINUN
5	1762885		5_1762885	0	0.4712	0.38	-0.0278	0.694986
5	1764000		5_1764000	0	0.4902	0.43	0.1157	0.005042
5	2827505	2832832	putative mannan endo-1,6-alpha-mannosidase C1198.06c n=1 Tax=Pecten maximus TaxID=6579 RepID=UPI0014590BCB
5	2829913		5_2829913	0.04	0.489366	0.427083	-0.0196	0.644464
5	2830078		5_2830078	0.02	0.470012	0.377551	-0.0224	0.623264
5	3856205	3870568	Pleiotropic regulator 1 n=2 Tax=Pectinidae TaxID=6566 RepID=A0A210R1N2_MIZYE
5	3858935		5_3858935	0	0.4422	0.33	-0.0454	1
5	3858992		5_3858992	0	0.4998	0.49	0.0069	0.27832
5	5149364	5189044	RING finger protein 150 n=2 Tax=Pectinidae TaxID=6566 RepID=A0A210Q974_MIZYE
5	5179431		5_5179431	0	0.5	0.5	-0.0091	0.460262
5	5179975		5_5179975	0	0.4488	0.34	-0.0303	0.962322
5	5482371	5493566	LOW QUALITY PROTEIN: hemicentin-1-like n=1 Tax=Lingula unguis TaxID=7574 RepID=A0A1S3IRE7_LINUN
5	5488566		5_5488566	0.04	0.353299	0.229167	-0.0229	0.679468
5	5488569		5_5488569	0.04	0.375	0.25	-0.0137	0.56951
5	7170165	7173091	Complement C1Q-like protein n=1 Tax=Hyriopsis cumingii TaxID=165450 RepID=A0A1L2FYM6_HYRCU
5	7171152		5_7171152	0	0.4982	0.47	0.0033	0.264994
5	8711036	8727154	LOW QUALITY PROTEIN: 2-oxoglutarate-dependent dioxygenase citB-like n=1 Tax=Pecten maximus TaxID=6579 RepID=UPI001459040D
5	8712286		5_8712286	0.24	0.265928	0.157895	-0.0366	0.848976
5	8712915		5_8712915	0.22	0.142012	0.0769231	-0.0373	0.738948
5	10317637	10330564	trichohyalin-like isoform X1 n=7 Tax=Pecten maximus TaxID=6579 RepID=UPI00145855A7
5	10319912		5_10319912	0	0.495	0.45	-0.0259	0.790056
5	10329097		5_10329097	0	0.4352	0.32	0.0219	0.165952
5	10541021	10553066	probable serine/threonine-protein kinase clkA-like n=1 Tax=Saccoglossus kowalevskii TaxID=10224 RepID=UPI0001CBC0D2
5	10550161		5_10550161	0	0.1472	0.08	0.0242	0.067188
5	10551646		5_10551646	0	0.18	0.1	0.0098	0.184512
5	15326263	15352627	Ras GTPase-activating-like protein IQGAP1 n=25 Tax=cellular organisms TaxID=131567 RepID=A0A2U9BBA2_SCOMX
5	15348681		5_15348681	0.12	0.46875	0.375	-0.0002	0.368822
5	15349376		5_15349376	0.12	0.483471	0.409091	-0.0168	0.441348
5	17190414	17281771	eukaryotic translation initiation factor 5B n=1 Tax=Crassostrea gigas TaxID=29159 RepID=UPI00148A9FF2
5	17191352		5_17191352	0	0.4712	0.38	0.0864	0.022846
5	17191736		5_17191736	0	0.4902	0.43	0.0513	0.06367
5	17747855	17774665	heat shock protein 75 kDa, mitochondrial-like n=1 Tax=Aplysia californica TaxID=6500 RepID=UPI00065B5998
5	17748890		5_17748890	0	0.2112	0.12	-0.0274	0.584558
5	17766819		5_17766819	0	0.4928	0.44	-0.0264	0.901958
5	19224982	19245683	Calmodulin n=2 Tax=Pectinidae TaxID=6566 RepID=A0A210PEP6_MIZYE
5	19242030		5_19242030	0.2	0.28875	0.175	0.0364	0.134454
5	19242545		5_19242545	0.28	0.499614	0.486111	-0.0421	0.690206
5	20306995	20316203	ATP-binding cassette sub-family E member 1 n=6 Tax=Chelicerata TaxID=6843 RepID=A0A4Y2C9F5_ARAVE
5	20317732	20321973	ATP-binding cassette sub-family E member 1 n=2 Tax=Pectinidae TaxID=6566 RepID=A0A210Q899_MIZYE
5	20320420		5_20320420	0	0.1472	0.08	0.0309	0.22155
5	20321554		5_20321554	0.04	0.478299	0.395833	-0.0169	0.281908
5	20574327	20593892	Heat shock 70 kDa protein 12A n=3 Tax=Crassostrea TaxID=6564 RepID=K1P486_CRAGI
5	20575148		5_20575148	0.04	0.499132	0.479167	0.0386	0.114216
5	20575617		5_20575617	0	0.4998	0.49	-0.0042	0.390512
5	21183843	21260631	Transforming growth factor-beta-induced protein ig-h3 n=2 Tax=Pectinidae TaxID=6566 RepID=A0A210QKJ7_MIZYE
5	21251518		5_21251518	0	0.495	0.45	-0.0305	0.81531
5	21251818		5_21251818	0.02	0.369846	0.244898	-0.0104	0.499704
5	21691549	21707043	post-GPI attachment to proteins factor 2-like n=1 Tax=Aplysia californica TaxID=6500 RepID=UPI000359A45A
5	21692276		5_21692276	0	0.4758	0.39	-0.0202	0.632564
5	21693649		5_21693649	0	0.495	0.45	-0.0286	0.901826
5	23231411	23383825	Kinesin-like protein KIF1C n=1 Tax=Collichthys lucidus TaxID=240159 RepID=A0A4U5VWU6_COLLU
5	23243932		5_23243932	0.04	0.499783	0.489583	-0.0281	0.617782
5	23383000		5_23383000	0.02	0.369846	0.244898	-0.0199	0.571474
5	23643791	23666597	Leucyl-tRNA synthetase n=1 Tax=Lottia gigantea TaxID=225164 RepID=V3ZR68_LOTGI
5	23650635		5_23650635	0	0.455	0.35	-0.0341	0.963798
5	23653390		5_23653390	0	0.4422	0.33	-0.0238	0.709114
5	26764393	26765558	Exodeoxyribonuclease III n=2 Tax=Bathymodiolus brooksi thiotrophic gill symbiont TaxID=1052209 RepID=A0A482YVF6_9BACT
5	28109089	28126298	heat shock 70 kDa protein 12A isoform X1 n=2 Tax=Crassostrea gigas TaxID=29159 RepID=UPI00148ADAAB
5	28120240		5_28120240	0	0.4968	0.46	0.0365	0.113294
5	28121331		5_28121331	0	0.32	0.2	0.0474	0.049194
5	29140047	29152159	Hexosyltransferase n=2 Tax=Crassostrea gigas TaxID=29159 RepID=K1QVC3_CRAGI
5	29141076		5_29141076	0	0.3942	0.27	0.0453	0.086572
5	29151780		5_29151780	0	0.3318	0.21	0.0972	0.005566
5	29345636	29376090	hypoxia-inducible factor 1-alpha n=1 Tax=Crassostrea gigas TaxID=29159 RepID=UPI00148A5DD6
5	29373657		5_29373657	0.02	0.499792	0.489796	0.0499	0.099736
5	29373915		5_29373915	0	0.4982	0.47	0.0033	0.321718
5	30410646	30418035	DNA-directed RNA polymerases I and III subunit RPAC2-like n=2 Tax=Crassostrea TaxID=6564 RepID=UPI0005C34F88
5	30417806		5_30417806	0	0.5	0.5	-0.0357	0.966122
5	30417810		5_30417810	0	0.4758	0.39	-0.0219	0.592038
5	32001194	32019994	calponin homology domain-containing protein DDB_G0272472 n=1 Tax=Crassostrea gigas TaxID=29159 RepID=UPI00148A1471
5	32004079		5_32004079	0	0.4902	0.43	-0.0181	0.732384
5	32008462		5_32008462	0	0.495	0.45	-0.0343	1
5	32937752	32949493	oncoprotein-induced transcript 3 protein-like n=1 Tax=Pecten maximus TaxID=6579 RepID=UPI0014587DE9
5	32947362		5_32947362	0.08	0.465974	0.369565	0.0276	0.081544
5	32947406		5_32947406	0.08	0.465974	0.369565	0.0276	0.08178
5	33587884	33826816	heat shock 70 kDa protein 4 isoform X1 n=2 Tax=Crassostrea gigas TaxID=29159 RepID=UPI00148A2CDF
5	33614480		5_33614480	0	0.4992	0.48	0.0296	0.153992
5	33617396		5_33617396	0	0.4992	0.48	-0.0044	0.547942
5	33872116	33890708	cyclic nucleotide-gated channel rod photoreceptor subunit alpha-like n=1 Tax=Pecten maximus TaxID=6579 RepID=UPI001458D459
5	33875462		5_33875462	0.22	0.49474	0.448718	-0.0055	0.30347
5	33875671		5_33875671	0.2	0.48875	0.425	0.0235	0.156632
5	35041955	35050903	Sequestosome-1 n=1 Tax=Mizuhopecten yessoensis TaxID=6573 RepID=A0A210R431_MIZYE
5	35042299		5_35042299	0	0.4488	0.34	0.0307	0.116636
5	35049766		5_35049766	0	0.2952	0.18	-0.0211	0.60188
5	35249729	35377454	Cyclophilin D n=1 Tax=Hyriopsis schlegelii TaxID=319528 RepID=A0A097A0B5_HYRSC
5	35250483		5_35250483	0	0.4872	0.42	-0.0123	0.445282
5	35251189		5_35251189	0	0.4902	0.43	-0.0017	0.312846
5	35561557	35607198	protein cramped-like isoform X1 n=2 Tax=Pecten maximus TaxID=6579 RepID=UPI0014590E4E
5	35561832		5_35561832	0	0.495	0.45	-0.044	0.967448
5	35562375		5_35562375	0	0.4928	0.44	-0.0272	0.967284
5	35863150	35883190	CDP-diacylglycerol--glycerol-3-phosphate 3-phosphatidyltransferase n=2 Tax=Cynoglossus semilaevis TaxID=244447 RepID=A0A3P8W1W4_CYNSE
5	35867063		5_35867063	0.16	0.375	0.25	0.0564	0.055838
5	35872809		5_35872809	0.18	0.480964	0.402439	-0.0259	0.46239
5	37962462	37973828	Exocyst complex component 8 n=2 Tax=Pectinidae TaxID=6566 RepID=A0A210PXP0_MIZYE
5	37966793		5_37966793	0	0.4902	0.43	-0.0383	0.78566
5	37966929		5_37966929	0	0.4998	0.49	-0.0356	0.793816
5	38178655	38189240	E3 ubiquitin-protein ligase MYCBP2-like n=1 Tax=Aethina tumida TaxID=116153 RepID=UPI00096B0F10
5	38183554		5_38183554	0	0.4902	0.43	-0.023	0.70871
5	38185312		5_38185312	0	0.4872	0.42	-0.0096	0.447838
5	41157581	41316829	E3 ubiquitin-protein ligase rnf213-alpha-like n=1 Tax=Anneissia japonica TaxID=1529436 RepID=UPI001425AF26
5	41174978		5_41174978	0.24	0.399931	0.276316	-0.0557	0.841156
5	41184507		5_41184507	0.18	0.433076	0.317073	-0.0352	0.649762
5	41645754	41694132	CD109 antigen-like isoform X1 n=9 Tax=Crassostrea virginica TaxID=6565 RepID=UPI000BAF7682
5	41684988		5_41684988	0	0.3078	0.19	-0.0403	0.724238
5	41688394		5_41688394	0	0.4968	0.46	-0.017	0.644638
5	42733238	42745285	dolichyl-phosphate beta-glucosyltransferase-like n=1 Tax=Pecten maximus TaxID=6579 RepID=UPI00145819A5
5	42734170		5_42734170	0	0.5	0.5	0.0061	0.35158
5	42735376		5_42735376	0	0.48	0.4	0.0102	0.258158
5	43454883	43462060	protein toll-like n=1 Tax=Crassostrea gigas TaxID=29159 RepID=UPI0005C3BD68
5	43459677		5_43459677	0.08	0.491493	0.434783	-0.0265	0.598542
5	43460876		5_43460876	0.04	0.496528	0.458333	0.0111	0.145066
5	43991621	44006222	inositol phosphoceramide mannosyltransferase 1-like n=1 Tax=Lingula unguis TaxID=7574 RepID=A0A2R2MLS9_LINUN
5	44004661		5_44004661	0	0.3848	0.26	0.0093	0.285242
5	44004791		5_44004791	0	0.4902	0.43	0.0274	0.139706
5	44119181	44130737	LOW QUALITY PROTEIN: NEDD4-binding protein 2-like n=1 Tax=Pecten maximus TaxID=6579 RepID=UPI001458B643
5	44120320		5_44120320	0	0.495	0.45	-0.0199	0.738512
5	44120519		5_44120519	0	0.4352	0.32	-0.0287	1
5	44804966	44856431	Transporter n=2 Tax=Mizuhopecten yessoensis TaxID=6573 RepID=A0A210QBZ6_MIZYE
5	44854155		5_44854155	0	0.4928	0.44	0.0009	0.359018
5	44854577		5_44854577	0	0.4422	0.33	-0.0279	0.858086
5	46125470	46178807	Glucose dehydrogenase [acceptor] n=1 Tax=Mizuhopecten yessoensis TaxID=6573 RepID=A0A210Q8G7_MIZYE
5	46134949		5_46134949	0	0.4838	0.41	0.0629	0.050612
5	46142406		5_46142406	0	0.4872	0.42	-0.0082	0.484782
5	46632913	46637335	apolipoprotein D-like n=1 Tax=Pecten maximus TaxID=6579 RepID=UPI0014581317
5	46634483		5_46634483	0	0.4992	0.48	-0.0518	0.905296
5	46634489		5_46634489	0	0.4712	0.38	-0.0485	0.749478
5	47155449	47169180	DOMON domain-containing protein n=1 Tax=Elysia chlorotica TaxID=188477 RepID=A0A433TJV3_ELYCH
5	47159526		5_47159526	0	0.3078	0.19	0.0033	0.230604
5	47159527		5_47159527	0	0.3078	0.19	0.0033	0.23177
5	47515738	47545573	BTB/POZ domain-containing protein 17 n=5 Tax=Pectinidae TaxID=6566 RepID=A0A210PZH2_MIZYE
5	47541821		5_47541821	0	0.4902	0.43	0.0176	0.177568
5	47542127		5_47542127	0	0.4872	0.42	0.0056	0.229256
5	47629301	47646494	tumor suppressor candidate 3-like n=1 Tax=Aplysia californica TaxID=6500 RepID=UPI000359BEAC
5	47645951		5_47645951	0.06	0.481666	0.404255	-0.0338	0.860618
5	47646089		5_47646089	0.08	0.476371	0.391304	0.0841	0.019044
5	48137035	48266487	receptor-type tyrosine-protein phosphatase T-like n=1 Tax=Crassostrea virginica TaxID=6565 RepID=UPI000BAE908A
5	48137291		5_48137291	0	0.4758	0.39	-0.0247	0.571292
5	48151105		5_48151105	0.02	0.424823	0.306122	0.0103	0.190514
5	48797424	48828072	Si:ch73-359m17.2 n=1 Tax=Astyanax mexicanus TaxID=7994 RepID=A0A3B1JWB5_ASTMX
5	48822679		5_48822679	0	0.3318	0.21	0.009	0.19677
5	48825419		5_48825419	0	0.4662	0.37	-0.0388	0.77505
5	48851299	48864348	Cytochrome P450 4F22 n=3 Tax=Crassostrea gigas TaxID=29159 RepID=K1R6W1_CRAGI
5	48856368		5_48856368	0.1	0.497778	0.466667	-0.0466	0.88999
5	48857211		5_48857211	0.1	0.475309	0.388889	0.1072	0.011006
5	49256398	49261661	leucine-rich repeat and fibronectin type III domain-containing protein 1-like protein n=1 Tax=Mizuhopecten yessoensis TaxID=6573 RepID=UPI000B45A2B7
5	49260648		5_49260648	0.1	0.497778	0.466667	0.0753	0.02545
5	49261452		5_49261452	0.02	0.439817	0.326531	-0.0343	0.705658
5	49340103	49367669	RING finger protein 121 n=4 Tax=Pectinidae TaxID=6566 RepID=A0A210PL76_MIZYE
5	49354975		5_49354975	0	0.4998	0.49	0.0718	0.033614
5	49355063		5_49355063	0	0.48	0.4	0.0076	0.32433
5	49662823	49679687	Collagen alpha-6(VI) chain n=1 Tax=Mizuhopecten yessoensis TaxID=6573 RepID=A0A210PI34_MIZYE
5	49671634		5_49671634	0.24	0.422091	0.302632	-0.0405	0.76618
5	49672013		5_49672013	0.22	0.483892	0.410256	0.0294	0.148374
5	49969883	49990559	zinc finger protein 845-like isoform X1 n=2 Tax=Crassostrea gigas TaxID=29159 RepID=UPI00148AD58C
5	49983870		5_49983870	0	0.4982	0.47	-0.0284	0.690114
5	49984671		5_49984671	0	0.48	0.4	-0.0261	0.752874
5	50453783	50497486	serine protease inhibitor Cvsi-2-like n=1 Tax=Crassostrea virginica TaxID=6565 RepID=UPI000BAEED79
5	50479112		5_50479112	0	0.4488	0.34	-0.0204	0.797764
5	50480332		5_50480332	0	0.3848	0.26	-0.0289	0.917248
6	412353	427227	aminopeptidase N-like isoform X1 n=5 Tax=Pecten maximus TaxID=6579 RepID=UPI001458269E
6	414580		6_414580	0	0.4872	0.42	-0.0375	0.966544
6	415772		6_415772	0	0.4928	0.44	-0.0295	0.738492
6	513084	534398	Tetraspanin n=1 Tax=Meretrix meretrix TaxID=291251 RepID=A0A173DQG0_MERMT
6	513986		6_513986	0	0.4992	0.48	-0.0314	0.818896
6	514299		6_514299	0	0.4998	0.49	-0.0075	0.458262
6	949448	967663	T-complex protein 1 subunit epsilon-like isoform X2 n=4 Tax=Crassostrea TaxID=6564 RepID=UPI00148A1B75
6	949967		6_949967	0	0.4992	0.48	0.0128	0.202142
6	949974		6_949974	0	0.48	0.4	-0.0159	0.4471
6	1283019	1304247	Cytochrome P450 2D14 n=6 Tax=Crassostrea gigas TaxID=29159 RepID=K1Q9W0_CRAGI
6	1287639		6_1287639	0	0.4902	0.43	-0.0394	0.934342
6	1289428		6_1289428	0	0.4992	0.48	-0.0016	0.265532
6	1394956	1413123	SRP54 domain-containing protein n=1 Tax=Pomacea canaliculata TaxID=400727 RepID=A0A2T7P0C8_POMCA
6	1395305		6_1395305	0	0.4968	0.46	0.0112	0.294366
6	1395333		6_1395333	0	0.4982	0.47	-0.0098	0.52789
6	2564186	2593482	cytochrome P450 20A1-like n=1 Tax=Acanthaster planci TaxID=133434 RepID=UPI000B911F8C
6	2578050		6_2578050	0.04	0.413194	0.291667	0.0071	0.277834
6	2578605		6_2578605	0.04	0.451172	0.34375	-0.0292	0.677894
6	3423377	3441482	chlorophyllase-2, chloroplastic-like n=1 Tax=Crassostrea virginica TaxID=6565 RepID=UPI000BB0C72F
6	3427811		6_3427811	0	0.4758	0.39	0.0209	0.15893
6	3427814		6_3427814	0	0.4838	0.41	0.0367	0.07951
6	4143664	4149052	Chitin-binding type-2 domain-containing protein n=3 Tax=Crassostrea gigas TaxID=29159 RepID=K1RAU5_CRAGI
6	4147979		6_4147979	0.02	0.359225	0.234694	0.0731	0.025046
6	4148056		6_4148056	0.02	0.273219	0.163265	-0.0175	0.572034
6	7014499	7035328	Sodium/potassium-transporting ATPase subunit alpha n=2 Tax=Veneroida TaxID=6580 RepID=A0A513U822_SINCO
6	7021085		6_7021085	0	0.5	0.5	0.0273	0.202894
6	7033130		6_7033130	0	0.1302	0.07	0.173	0.001438
6	7618743	7700532	tetraspanin-18-like n=1 Tax=Pecten maximus TaxID=6579 RepID=UPI001459052C
6	7644953		6_7644953	0	0.4902	0.43	-0.0222	0.62062
6	7644979		6_7644979	0	0.4992	0.48	-0.0102	0.58229
6	8485120	8525367	NRAMP n=1 Tax=Sinonovacula constricta TaxID=98310 RepID=A0A1P8DWW1_SINCO
6	8487168		6_8487168	0.14	0.497566	0.465116	-0.0274	0.717582
6	8487527		6_8487527	0.14	0.46728	0.372093	-0.0372	1
6	8532591	8555324	NRAMP n=1 Tax=Sinonovacula constricta TaxID=98310 RepID=A0A1P8DWW1_SINCO
6	8548590		6_8548590	0	0.4872	0.42	-0.032	0.842774
6	8548650		6_8548650	0	0.4872	0.42	-0.0016	0.449568
6	9193840	9202421	VWFA domain-containing protein n=1 Tax=Elysia chlorotica TaxID=188477 RepID=A0A433TBF7_ELYCH
6	9198584		6_9198584	0	0.1958	0.11	-0.028	1
6	9199792		6_9199792	0.04	0.202908	0.114583	-0.0073	0.554554
6	9296013	9360890	mucin-4 isoform X1 n=5 Tax=Crassostrea gigas TaxID=29159 RepID=UPI00148AB654
6	9296633		6_9296633	0	0.4838	0.41	-0.0221	0.76044
6	9296933		6_9296933	0	0.5	0.5	-0.0131	0.604524
6	9571290	9592758	Ubiquitin thioesterase n=2 Tax=Mizuhopecten yessoensis TaxID=6573 RepID=A0A210QDI5_MIZYE
6	9575094		6_9575094	0	0.3542	0.23	-0.0147	0.623884
6	9590207		6_9590207	0	0.48	0.4	-0.0117	0.703178
6	10137709	10151091	Proliferation-associated protein 2G4 n=2 Tax=Pectinidae TaxID=6566 RepID=A0A210QP07_MIZYE
6	10138135		6_10138135	0	0.4968	0.46	-0.0154	0.711442
6	10138259		6_10138259	0	0.1958	0.11	-0.0118	0.505592
6	11576516	11583055	26S proteasome non-ATPase regulatory subunit 9-like n=1 Tax=Pecten maximus TaxID=6579 RepID=UPI0014585E81
6	11581379		6_11581379	0	0.4872	0.42	0.1784	0.000392
6	11582482		6_11582482	0	0.4998	0.49	0.0069	0.273304
6	11585401	11617793	glucose-6-phosphate exchanger SLC37A2-like isoform X1 n=4 Tax=Pecten maximus TaxID=6579 RepID=UPI001458BB06
6	11586723		6_11586723	0	0.4982	0.47	0.0608	0.022836
6	11586789		6_11586789	0	0.495	0.45	0.1009	0.007318
6	12406369	12417900	Protein BTG3 n=2 Tax=Crassostrea gigas TaxID=29159 RepID=K1Q750_CRAGI
6	12407327		6_12407327	0	0.4838	0.41	-0.017	0.711158
6	12408014		6_12408014	0	0.4902	0.43	-0.0367	0.93547
6	13558631	13569986	Homeobox protein GBX-2 n=8 Tax=Mollusca TaxID=6447 RepID=A0A210QIS5_MIZYE
6	13567320		6_13567320	0	0.4902	0.43	-0.0265	0.966026
6	13567857		6_13567857	0	0.4488	0.34	-0.0387	0.92854
6	15127317	15130437	hemicentin-1-like n=1 Tax=Branchiostoma belcheri TaxID=7741 RepID=UPI0009481B6F
6	15558330	15599961	Collagen pro alpha-chain n=1 Tax=Haliotis discus TaxID=36094 RepID=O97406_HALDI
6	15595766		6_15595766	0.02	0.149938	0.0816327	0.1047	0.015204
6	15598779		6_15598779	0	0.4712	0.38	0.0578	0.05665
6	15796735	15851125	ATP-binding cassette sub-family C member 1 n=1 Tax=Dreissena polymorpha TaxID=45954 RepID=A0A0B5J5C7_DREPO
6	15805889		6_15805889	0	0.4608	0.36	-0.0137	0.51682
6	15805890		6_15805890	0	0.4982	0.47	-0.035	0.84567
6	16865193	16885986	monocarboxylate transporter 12-like n=1 Tax=Pecten maximus TaxID=6579 RepID=UPI0014584068
6	16866805		6_16866805	0	0.3542	0.23	-0.0217	0.424976
6	16867070		6_16867070	0	0.4872	0.42	-0.0375	0.96584
6	16947407	16966792	bifunctional purine biosynthesis protein PURH-like n=4 Tax=Crassostrea TaxID=6564 RepID=UPI00148AA80E
6	16949964		6_16949964	0	0.4998	0.49	0.0721	0.035256
6	16958090		6_16958090	0	0.4118	0.29	-0.022	0.78382
6	18874482	18880689	C-type lectin n=1 Tax=Ruditapes philippinarum TaxID=129788 RepID=C8CBL6_RUDPH
6	18879122		6_18879122	0	0.2822	0.17	-0.0046	0.272272
6	20599320	20635383	Contactin n=2 Tax=Mizuhopecten yessoensis TaxID=6573 RepID=A0A210PTR2_MIZYE
6	21134304	21168602	Glycerol kinase (Fragment) n=1 Tax=Lottia gigantea TaxID=225164 RepID=V3ZRA8_LOTGI
6	21142026		6_21142026	0	0.3078	0.19	0.011	0.317572
6	21145074		6_21145074	0	0.42	0.3	0.0023	0.31371
6	21638330	21659348	beta-1,3-galactosyltransferase 1-like n=1 Tax=Crassostrea virginica TaxID=6565 RepID=UPI000BB066A5
6	21638991		6_21638991	0	0.4902	0.43	-0.0356	0.78276
6	21639021		6_21639021	0	0.42	0.3	-0.0028	0.27585
6	27361965	27410665	F-box/LRR-repeat protein 7 n=8 Tax=Pectinidae TaxID=6566 RepID=A0A210QQS3_MIZYE
6	27362753		6_27362753	0	0.495	0.45	0.035	0.086198
6	27362754		6_27362754	0	0.4968	0.46	0.0534	0.04586
6	28000518	28031102	Vacuolar protein sorting-associated protein 16 homolog n=6 Tax=Crassostrea TaxID=6564 RepID=K1PWU7_CRAGI
6	28017501		6_28017501	0	0.4982	0.47	-0.0003	0.422914
6	28017504		6_28017504	0	0.4982	0.47	0.0143	0.270844
6	28696916	28710374	lactadherin-like n=1 Tax=Pecten maximus TaxID=6579 RepID=UPI0014588818
6	28703479		6_28703479	0.08	0.460066	0.358696	-0.0149	0.416606
6	28704888		6_28704888	0.12	0.456353	0.352273	0.0642	0.057914
6	29238151	29254078	sodium/glucose cotransporter 4-like n=1 Tax=Pecten maximus TaxID=6579 RepID=UPI0014586440
6	29239290		6_29239290	0.08	0.48086	0.402174	-0.0321	0.856318
6	29239291		6_29239291	0.08	0.488422	0.423913	-0.044	0.891184
6	29341901	29348639	C-type lectin n=1 Tax=Meretrix meretrix TaxID=291251 RepID=A0A173DQG5_MERMT
6	29344362		6_29344362	0	0.4872	0.42	0.0337	0.10675
6	29346049		6_29346049	0.08	0.193762	0.108696	-0.0379	1
6	29372396	29415276	solute carrier family 43 member 3-like n=1 Tax=Pecten maximus TaxID=6579 RepID=UPI0014584DE7
6	29378279		6_29378279	0.06	0.426664	0.308511	-0.0033	0.37605
6	29413839		6_29413839	0.06	0.334993	0.212766	-0.0249	0.617118
6	32304403	32346532	NPHS1 adhesion molecule, nephrin n=2 Tax=Anolis carolinensis TaxID=28377 RepID=H9GN95_ANOCA
6	32304661		6_32304661	0.3	0.244898	0.142857	0.2789	0.000262
6	32391110	32417412	Hypoxia up-regulated protein 1 n=3 Tax=Crassostrea gigas TaxID=29159 RepID=K1QBF7_CRAGI
6	32408541		6_32408541	0	0.4992	0.48	-0.0267	0.761212
6	32408631		6_32408631	0	0.3078	0.19	-0.002	0.577726
6	32795787	32852578	amiloride-sensitive amine oxidase [copper-containing]-like n=1 Tax=Crassostrea virginica TaxID=6565 RepID=UPI000BAFB61B
6	32844033		6_32844033	0	0.4928	0.44	-0.0317	0.843372
6	32844662		6_32844662	0	0.4872	0.42	-0.01	0.536346
6	33992131	34000304	MKI67 FHA domain-interacting nucleolar phosphoprotein-like n=1 Tax=Crassostrea virginica TaxID=6565 RepID=UPI000BB08873
6	33998893		6_33998893	0	0.4968	0.46	-0.0075	0.714156
6	33998989		6_33998989	0	0.495	0.45	0.0014	0.545268
6	34106889	34145158	Protein-serine/threonine kinase n=1 Tax=Biomphalaria glabrata TaxID=6526 RepID=A0A2C9JLI9_BIOGL
6	34132409		6_34132409	0	0.4902	0.43	-0.0207	0.756514
6	34137707		6_34137707	0	0.4278	0.31	-0.0158	0.759938
6	35615956	35622141	Sulfotransfer_1 domain-containing protein n=1 Tax=Lottia gigantea TaxID=225164 RepID=V4A9E7_LOTGI
6	37820425	37851256	LOW QUALITY PROTEIN: unhealthy ribosome biogenesis protein 2 homolog n=1 Tax=Crassostrea virginica TaxID=6565 RepID=UPI000BB03BBA
6	37831368		6_37831368	0	0.495	0.45	-0.0105	0.414524
6	37832109		6_37832109	0	0.495	0.45	-0.0065	0.43966
6	38908169	39001895	Max-like protein X n=2 Tax=Pectinidae TaxID=6566 RepID=A0A210PMT0_MIZYE
6	38953855		6_38953855	0	0.42	0.3	-0.0191	0.643804
6	38954045		6_38954045	0	0.4982	0.47	-0.0036	0.317084
6	39344453	39381324	Methyltransf_25 domain-containing protein n=1 Tax=Capitella teleta TaxID=283909 RepID=R7U3T2_CAPTE
6	39369056		6_39369056	0.26	0.126004	0.0675676	0.0143	0.259524
6	39380382		6_39380382	0.3	0.498367	0.471429	-0.0303	0.336798
6	39423589	39430108	type I iodothyronine deiodinase n=1 Tax=Erpetoichthys calabaricus TaxID=27687 RepID=UPI00109EFF3C
6	39428830		6_39428830	0.28	0.129244	0.0694444	0.0112	0.371882
6	39704297	39827588	LOW QUALITY PROTEIN: beta-mannosidase-like n=1 Tax=Crassostrea virginica TaxID=6565 RepID=UPI000BB068EC
6	39796684		6_39796684	0	0.4998	0.49	0.0051	0.446674
6	39803402		6_39803402	0	0.4968	0.46	-0.0105	0.445244
6	39889622	39905879	Coatomer subunit delta n=2 Tax=Pectinidae TaxID=6566 RepID=A0A210PSZ3_MIZYE
6	39894228		6_39894228	0	0.4872	0.42	-0.0319	0.90192
6	39894231		6_39894231	0	0.4608	0.36	-0.0234	0.71884
7	393058	397056	U-scoloptoxin(16)-Cw1a n=1 Tax=Crassostrea gigas TaxID=29159 RepID=UPI00148A3B3F
7	395526		7_395526	0	0.4712	0.38	0.0553	0.033406
7	396868		7_396868	0	0.3648	0.24	-0.0077	0.484526
7	1191398	1253190	Complement C1q-like protein 2 n=1 Tax=Ruditapes philippinarum TaxID=129788 RepID=A0A0U3AA90_RUDPH
7	1232475		7_1232475	0.02	0.492503	0.438776	-0.0106	0.401862
7	1232553		7_1232553	0.02	0.486672	0.418367	-0.0327	0.807404
7	2962113	2989530	Purine nucleoside phosphorylase n=2 Tax=Arion vulgaris TaxID=1028688 RepID=A0A0B6YS56_9EUPU
7	2965783		7_2965783	0	0.4608	0.36	-0.0216	0.746852
7	2966479		7_2966479	0	0.4838	0.41	-0.0225	0.840116
7	3392851	3425362	Putative phosphoethanolamine N-methyltransferase 3 n=7 Tax=Crassostrea TaxID=6564 RepID=K1QK13_CRAGI
7	3424293		7_3424293	0.04	0.421658	0.302083	0.0049	0.361806
7	3424701		7_3424701	0.04	0.492188	0.4375	-0.0334	0.780516
7	5869720	5919381	Fatty acid 2-hydroxylase n=1 Tax=Pomacea canaliculata TaxID=400727 RepID=A0A2T7NH57_POMCA
7	5908809		7_5908809	0	0.4278	0.31	0.0227	0.1655
7	5910368		7_5910368	0	0.5	0.5	-0.0086	0.40678
7	10932383	10944193	DNA ligase n=2 Tax=Pectinidae TaxID=6566 RepID=A0A210QMF7_MIZYE
7	10933342		7_10933342	0	0.495	0.45	-0.0252	0.713196
7	10933365		7_10933365	0	0.4662	0.37	-0.0006	0.40956
7	12218359	12231598	Omega glutathione S-transferase n=1 Tax=Ruditapes philippinarum TaxID=129788 RepID=G9HSP5_RUDPH
7	12225825		7_12225825	0	0.4608	0.36	-0.0075	0.43507
7	12225843		7_12225843	0	0.4488	0.34	0.006	0.289012
7	14222854	14247077	DNA topoisomerase I, mitochondrial-like isoform X1 n=3 Tax=Pecten maximus TaxID=6579 RepID=UPI0014582219
7	14226982		7_14226982	0	0.4982	0.47	0.0511	0.066208
7	14241446		7_14241446	0	0.495	0.45	-0.0129	0.580468
7	15134812	15146519	eIF2B_5 domain-containing protein n=1 Tax=Arion vulgaris TaxID=1028688 RepID=A0A0B6ZU51_9EUPU
7	15145020		7_15145020	0.02	0.399209	0.27551	-0.0316	0.878498
7	15145073		7_15145073	0.02	0.474802	0.387755	0.0699	0.031226
7	18061678	18088042	Oxidative stress-induced growth inhibitor 2 n=2 Tax=Pectinidae TaxID=6566 RepID=A0A210QXU8_MIZYE
7	18063327		7_18063327	0	0.4928	0.44	0.0017	0.33287
7	18064296		7_18064296	0	0.4838	0.41	0.034	0.095688
7	18234233	18268937	Carbonic anhydrase n=1 Tax=Tridacna squamosa TaxID=80830 RepID=A0A3G1J6U0_TRISQ
7	18236992		7_18236992	0	0.4998	0.49	0.0067	0.318206
7	18254068		7_18254068	0.02	0.474802	0.387755	-0.0292	1
7	18368575	18373154	interferon regulatory factor 8-like isoform X1 n=2 Tax=Pecten maximus TaxID=6579 RepID=UPI001458E8E6
7	18372402		7_18372402	0	0.4992	0.48	-0.0009	0.479078
7	18373072		7_18373072	0	0.4968	0.46	-0.0139	0.904966
7	18630934	18672083	core-binding factor subunit beta-like isoform X2 n=2 Tax=Crassostrea virginica TaxID=6565 RepID=UPI000BB0C7DD
7	18666371		7_18666371	0.12	0.495868	0.454545	0.1941	0.000918
7	18669354		7_18669354	0	0.4928	0.44	-0.0117	0.424002
7	19962848	19985716	Protein arginine N-methyltransferase n=2 Tax=Pectinidae TaxID=6566 RepID=A0A210PE51_MIZYE
7	19963956		7_19963956	0	0.455	0.35	0.0171	0.267148
7	19971385		7_19971385	0	0.1958	0.11	-0.0252	0.781652
7	20185321	20192968	Eukaryotic translation initiation factor 6 n=2 Tax=Pectinidae TaxID=6566 RepID=A0A210PE90_MIZYE
7	20185908		7_20185908	0	0.4992	0.48	0.0233	0.177328
7	20502457	20567336	serine/threonine-protein kinase/endoribonuclease IRE1-like isoform X1 n=5 Tax=Varroa TaxID=62624 RepID=UPI000BE1659D
7	20566394		7_20566394	0	0.4968	0.46	0.088	0.015824
7	20567103		7_20567103	0	0.4662	0.37	-0.028	0.80425
7	21253131	21267228	tumor protein p53-inducible nuclear protein 1-like n=1 Tax=Crassostrea virginica TaxID=6565 RepID=UPI000BAF0C47
7	21255768		7_21255768	0	0.4838	0.41	-0.0317	0.869122
7	21256396		7_21256396	0	0.4838	0.41	-0.0181	0.87034
7	21367422	21374363	patched domain-containing protein 3-like n=1 Tax=Pecten maximus TaxID=6579 RepID=UPI00145880A5
7	21536455	21546990	GMP reductase n=2 Tax=Pectinidae TaxID=6566 RepID=A0A210QXQ0_MIZYE
7	21539432		7_21539432	0	0.4998	0.49	0.0885	0.021144
7	21540622		7_21540622	0	0.4998	0.49	0.0204	0.199834
7	22831488	22926564	A disintegrin and metalloproteinase with thrombospondin motifs gon-1-like isoform X1 n=4 Tax=Pecten maximus TaxID=6579 RepID=UPI001458A0B8
7	22918496		7_22918496	0.08	0.453686	0.347826	-0.0048	0.335488
7	22919047		7_22919047	0.1	0.487901	0.422222	-0.0449	0.924682
7	22931669	22952637	ribosome biogenesis protein bop1-A-like n=1 Tax=Crassostrea virginica TaxID=6565 RepID=UPI000BAE7E3B
7	22933679		7_22933679	0	0.495	0.45	0.0284	0.123938
7	22933698		7_22933698	0	0.4758	0.39	0.0165	0.24591
7	23315854	23341941	Phospholipid-transporting ATPase n=7 Tax=Pectinidae TaxID=6566 RepID=A0A210PT26_MIZYE
7	23316858		7_23316858	0	0.4968	0.46	-0.0043	0.316736
7	23319158		7_23319158	0	0.3318	0.21	0.0065	0.330776
7	23394395	23414848	peroxidase-like n=1 Tax=Pecten maximus TaxID=6579 RepID=UPI0014590C6C
7	23398894		7_23398894	0	0.4608	0.36	0.0076	0.201756
7	23412337		7_23412337	0	0.4032	0.28	-0.0224	0.748084
7	25388628	25397541	Transforming growth factor-beta-induced protein ig-h3 n=8 Tax=Crassostrea gigas TaxID=29159 RepID=K1R7Y0_CRAGI
7	25393006		7_25393006	0.22	0.223537	0.128205	0.054	0.024344
7	25396981		7_25396981	0.16	0.191327	0.107143	-0.0258	0.379288
7	26081467	26085686	nose resistant to fluoxetine protein 6-like n=1 Tax=Pecten maximus TaxID=6579 RepID=UPI0014590B45
7	26081914		7_26081914	0.1	0.444444	0.333333	-0.0377	0.547608
7	26081996		7_26081996	0.1	0.470123	0.377778	-0.0141	0.316946
7	26230122	26235228	Cerebellin-1 n=1 Tax=Crassostrea gigas TaxID=29159 RepID=K1QFQ4_CRAGI
7	26233594		7_26233594	0	0.495	0.45	-0.0305	0.712204
7	27176879	27212531	E3 ubiquitin-protein ligase n=1 Tax=Mizuhopecten yessoensis TaxID=6573 RepID=A0A210QVF9_MIZYE
7	27181899		7_27181899	0	0.32	0.2	0.0245	0.190692
7	27189820		7_27189820	0	0.4838	0.41	0.0154	0.215728
7	28255287	28260207	Turripeptide Pal9.2 n=1 Tax=Polystira albida TaxID=394106 RepID=TU92_POLAB
7	28429164	28435618	Carboxylic ester hydrolase n=2 Tax=Crassostrea gigas TaxID=29159 RepID=K1P6V9_CRAGI
7	28430267		7_28430267	0.08	0.476371	0.391304	0.0097	0.12264
7	28431664		7_28431664	0.12	0.5	0.5	-0.0572	1
7	28479586	28485891	Carboxylic ester hydrolase n=2 Tax=Crassostrea gigas TaxID=29159 RepID=K1P6V9_CRAGI
7	30281675	30290155	Putative rRNA methyltransferase n=1 Tax=Mizuhopecten yessoensis TaxID=6573 RepID=A0A210Q816_MIZYE
7	33224455	33259531	GDP-mannose 4,6 dehydratase-like isoform X1 n=2 Tax=Crassostrea virginica TaxID=6565 RepID=UPI000BAFCEF7
7	33224765		7_33224765	0	0.1128	0.06	0.1098	0.014136
7	33226169		7_33226169	0	0.3432	0.22	-0.008	0.395462
7	33711823	33722424	ganglioside-induced differentiation-associated protein 1-like n=1 Tax=Mizuhopecten yessoensis TaxID=6573 RepID=UPI000B45EB79
7	33713278		7_33713278	0.06	0.477365	0.393617	-0.0128	0.736126
7	33713861		7_33713861	0.04	0.413194	0.291667	0.0091	0.214854
7	34240417	34262376	Glutathione synthetase n=1 Tax=Arion vulgaris TaxID=1028688 RepID=A0A0B6ZT03_9EUPU
7	34241869		7_34241869	0	0.4488	0.34	-0.0292	0.798148
7	34241910		7_34241910	0	0.4902	0.43	-0.0347	1
7	34362449	34376630	Testis, prostate and placenta-expressed protein n=2 Tax=Pectinidae TaxID=6566 RepID=A0A210QHF7_MIZYE
7	34363133		7_34363133	0.04	0.341797	0.21875	0.0552	0.02968
7	34366759		7_34366759	0	0.4758	0.39	-0.0016	0.42682
7	35542395	35555932	LOW QUALITY PROTEIN: phosphoenolpyruvate carboxykinase, cytosolic [GTP]-like n=1 Tax=Pecten maximus TaxID=6579 RepID=UPI00145806CC
7	35549466		7_35549466	0	0.4422	0.33	-0.0097	0.50578
7	35550190		7_35550190	0	0.4998	0.49	-0.0326	0.90164
7	36291373	36301013	Cerebellin-1 n=1 Tax=Crassostrea gigas TaxID=29159 RepID=K1QFQ4_CRAGI
7	36300463		7_36300463	0	0.4712	0.38	0.0003	0.206384
7	36300610		7_36300610	0	0.3942	0.27	-0.013	0.315
7	37872009	37875984	Apolipoprotein D n=2 Tax=Crassostrea gigas TaxID=29159 RepID=K1RDQ9_CRAGI
7	38234600	38244536	2,4-dienoyl-CoA reductase, mitochondrial n=2 Tax=Crassostrea gigas TaxID=29159 RepID=K1PEV9_CRAGI
7	38235073		7_38235073	0	0.4982	0.47	-0.0316	0.818648
7	38235110		7_38235110	0	0.4998	0.49	-0.0273	0.90325
7	39588441	39603222	C-type lectin domain family 17, member A-like isoform X2 n=1 Tax=Pecten maximus TaxID=6579 RepID=UPI0014591685
7	39591462		7_39591462	0.08	0.226843	0.130435	0.0173	0.095886
8	1070332	1079168	X-box-binding protein 1 n=2 Tax=Crassostrea gigas TaxID=29159 RepID=K1QSA0_CRAGI
8	1071467		8_1071467	0	0.4968	0.46	0.0337	0.100134
8	1071621		8_1071621	0	0.4998	0.49	-0.0138	0.663116
8	1540714	1558958	Transducin beta-like protein 2 n=2 Tax=Pectinidae TaxID=6566 RepID=A0A210QWI7_MIZYE
8	1543736		8_1543736	0	0.4902	0.43	0.0143	0.25456
8	1549973		8_1549973	0	0.455	0.35	-0.0239	0.775474
8	2084450	2096644	Phosphoenolpyruvate phosphomutase n=2 Tax=Crassostrea TaxID=6564 RepID=K1RHB3_CRAGI
8	2095044		8_2095044	0	0.4488	0.34	-0.0237	0.68902
8	2095141		8_2095141	0	0.5	0.5	-0.0115	0.49349
8	2756360	2784326	DNA-binding protein SATB n=2 Tax=Biomphalaria glabrata TaxID=6526 RepID=A0A2C9JTS8_BIOGL
8	2780162		8_2780162	0	0.3848	0.26	-0.0269	0.615922
8	2780724		8_2780724	0	0.4662	0.37	-0.0178	0.646158
8	3620691	3678581	mitotic checkpoint serine/threonine-protein kinase BUB1-like n=1 Tax=Crassostrea virginica TaxID=6565 RepID=UPI000BAF8648
8	3647675		8_3647675	0	0.4998	0.49	-0.0186	0.560804
8	3648212		8_3648212	0	0.5	0.5	-0.04	0.84646
8	7248233	7360980	Inositol-3-phosphate synthase n=4 Tax=Crassostrea TaxID=6564 RepID=K1RLY3_CRAGI
8	7248772		8_7248772	0.02	0.336735	0.214286	0.0189	0.202892
8	7248807		8_7248807	0.02	0.286756	0.173469	-0.0012	0.304992
8	8865312	8885631	Protein MB21D2 n=1 Tax=Mizuhopecten yessoensis TaxID=6573 RepID=A0A210QHK4_MIZYE
8	8880147		8_8880147	0	0.4928	0.44	-0.0094	0.39405
8	8880562		8_8880562	0	0.4902	0.43	-0.0032	0.344012
8	10461636	10467702	complement component 1 Q subcomponent-binding protein, mitochondrial-like n=1 Tax=Eurytemora affinis TaxID=88015 RepID=UPI000C76799E
8	10465107		8_10465107	0	0.4608	0.36	-0.031	1
8	10466985		8_10466985	0	0.455	0.35	0.0639	0.046184
8	11257122	11266031	Two pore calcium channel protein 1 n=1 Tax=Mizuhopecten yessoensis TaxID=6573 RepID=A0A210Q0H2_MIZYE
8	11264225		8_11264225	0	0.4992	0.48	-0.0043	0.345702
8	11264468		8_11264468	0.02	0.464806	0.367347	-0.0297	0.68989
8	12722411	12736124	LOW QUALITY PROTEIN: vacuole membrane protein 1-like n=1 Tax=Pecten maximus TaxID=6579 RepID=UPI001458352F
8	12726165		8_12726165	0	0.4928	0.44	-0.019	0.59846
8	12731167		8_12731167	0	0.4838	0.41	0.0353	0.102282
8	15464927	15483040	Sulfotransferase family cytosolic 1B member 1 n=1 Tax=Mizuhopecten yessoensis TaxID=6573 RepID=A0A210PFB3_MIZYE
8	15465227		8_15465227	0	0.455	0.35	-0.0031	0.190554
8	15471240		8_15471240	0	0.495	0.45	-0.0051	0.33373
8	15834537	15836881	probable ATP-dependent RNA helicase DDX58 n=1 Tax=Pecten maximus TaxID=6579 RepID=UPI001459146C
8	15835247		8_15835247	0.08	0.176512	0.0978261	-0.0085	0.481328
8	15836056		8_15836056	0.16	0.152778	0.0833333	-0.0006	0.406742
8	15901494	15914864	G-protein coupled receptor 143 n=1 Tax=Mizuhopecten yessoensis TaxID=6573 RepID=A0A210Q1E6_MIZYE
8	15912268		8_15912268	0	0.4968	0.46	0.0181	0.207498
8	15912474		8_15912474	0	0.4758	0.39	-0.0013	0.382422
8	16669510	16674873	fatty acid-binding protein 9-like n=2 Tax=Crassostrea virginica TaxID=6565 RepID=UPI000BB088EE
8	16674344		8_16674344	0.12	0.498967	0.477273	0.0663	0.043136
8	16674397		8_16674397	0.12	0.483471	0.409091	0.0729	0.0367
8	18897410	18923301	Carbohydrate sulfotransferase 15 n=2 Tax=Crassostrea gigas TaxID=29159 RepID=K1QKR6_CRAGI
8	18898537		8_18898537	0	0.4712	0.38	-0.0307	0.835902
8	18900024		8_18900024	0	0.4662	0.37	-0.0264	0.625154
8	19340526	19398271	Protein yippee-like n=19 Tax=Eumetazoa TaxID=6072 RepID=A0A1S3GZQ4_LINUN
8	19390723		8_19390723	0	0.32	0.2	-0.035	0.858784
8	19390992		8_19390992	0	0.48	0.4	-0.0312	0.840076
8	19491475	19499851	C-type lectin 2 n=1 Tax=Ruditapes philippinarum TaxID=129788 RepID=A0A451ET87_RUDPH
8	19495586		8_19495586	0.06	0.296288	0.180851	-0.0064	0.48764
8	19528420	19540564	Sulfotransferase family cytosolic 1B member 1 n=1 Tax=Mizuhopecten yessoensis TaxID=6573 RepID=A0A210PFB3_MIZYE
8	19538893		8_19538893	0	0.4872	0.42	0.0889	0.02108
8	19540223		8_19540223	0	0.495	0.45	-0.0069	0.965946
8	21564139	21576047	C-type lectin 2 n=1 Tax=Ruditapes philippinarum TaxID=129788 RepID=A0A451ET87_RUDPH
8	22462621	22512925	peroxisomal membrane protein 2-like n=1 Tax=Pecten maximus TaxID=6579 RepID=UPI001458EF49
8	22466350		8_22466350	0	0.2952	0.18	-0.0022	0.424432
8	22506077		8_22506077	0	0.455	0.35	-0.002	0.252928
8	23105296	23121353	perlucin-like protein n=2 Tax=Crassostrea gigas TaxID=29159 RepID=UPI0005C3AF2F
8	23120088		8_23120088	0.02	0.259267	0.153061	0.0189	0.203802
8	23601374	23657537	P2X purinoceptor 4-like isoform X1 n=2 Tax=Crassostrea virginica TaxID=6565 RepID=UPI000BAF518F
8	23607475		8_23607475	0	0.4902	0.43	0.0339	0.125676
8	23609773		8_23609773	0	0.3542	0.23	0.0869	0.03771
8	24835006	24864431	Oxysterol-binding protein 1 n=5 Tax=Pectinidae TaxID=6566 RepID=A0A210PUY2_MIZYE
8	24858162		8_24858162	0	0.4992	0.48	-0.0059	0.441772
8	24858164		8_24858164	0	0.4992	0.48	-0.0059	0.44317
8	24871458	24929287	Carbonate dehydratase IV n=1 Tax=Tridacna squamosa TaxID=80830 RepID=A0A2R2Y2Q1_TRISQ
8	24872554		8_24872554	0	0.4928	0.44	0.0042	0.409204
8	24872754		8_24872754	0	0.48	0.4	-0.0182	0.657284
8	25364815	25373093	protein unc-13 homolog C-like n=1 Tax=Dendronephthya gigantea TaxID=151771 RepID=UPI00106DAEFF
8	25541845	25558928	Matrix metalloproteinase 1 n=4 Tax=Crassostrea virginica TaxID=6565 RepID=A0A0K0MB45_CRAVI
8	25546445		8_25546445	0	0.4968	0.46	-0.0126	0.402182
8	25555986		8_25555986	0	0.4982	0.47	0.0356	0.120706
8	26217978	26233866	probable phytanoyl-CoA dioxygenase isoform X1 n=2 Tax=Mizuhopecten yessoensis TaxID=6573 RepID=UPI000B45CC0C
8	26219754		8_26219754	0	0.3942	0.27	-0.0211	0.404096
8	26219864		8_26219864	0	0.4118	0.29	-0.0545	0.848512
8	26602967	26618675	Transcription elongation factor SPT4 n=1 Tax=Lingula unguis TaxID=7574 RepID=A0A1S3I998_LINUN
8	26612097		8_26612097	0	0.32	0.2	0.0371	0.138992
8	26612309		8_26612309	0	0.1302	0.07	-0.0368	0.70151
8	26864918	26881602	sphingomyelin phosphodiesterase n=2 Tax=Crassostrea gigas TaxID=29159 RepID=UPI00148A420E
8	26865508		8_26865508	0	0.4758	0.39	0.0322	0.119884
8	26877460		8_26877460	0	0.4758	0.39	0.0322	0.122792
8	27095357	27119189	LOW QUALITY PROTEIN: uncharacterized protein LOC117332279 n=1 Tax=Pecten maximus TaxID=6579 RepID=UPI0014586F02
8	27104223		8_27104223	0.2	0.362187	0.2375	-0.007	0.400708
8	27109411		8_27109411	0.26	0.470416	0.378378	-0.0606	1
8	30245012	30250586	tomoregulin-2-like n=1 Tax=Pecten maximus TaxID=6579 RepID=UPI0014589BFF
8	30250281		8_30250281	0.24	0.450139	0.342105	-0.0293	0.547448
8	30250348		8_30250348	0	0.4278	0.31	-0.0167	0.601488
8	30721612	30749672	LOC100145795 protein n=1 Tax=Xenopus tropicalis TaxID=8364 RepID=B1WBJ6_XENTR
8	30728011		8_30728011	0	0.5	0.5	0.0388	0.105818
8	30728012		8_30728012	0	0.5	0.5	0.0388	0.107682
8	31290591	31304717	Fructose-bisphosphate aldolase n=4 Tax=Crassostrea TaxID=6564 RepID=K1RTQ6_CRAGI
8	31296259		8_31296259	0	0.4968	0.46	-0.0297	0.904506
8	31296289		8_31296289	0	0.4992	0.48	-0.024	0.765518
8	31311450	31342685	Sodium/glucose cotransporter 4 n=2 Tax=Pectinidae TaxID=6566 RepID=A0A210PIN3_MIZYE
8	31321598		8_31321598	0	0.4968	0.46	0.0488	0.081288
8	31342192		8_31342192	0.06	0.488909	0.425532	0.1395	0.00202
8	33578339	33592461	A disintegrin and metalloproteinase with thrombospondin motifs adt-1-like isoform X1 n=1 Tax=Actinia tenebrosa TaxID=6105 RepID=UPI0012B65A04
8	33587729		8_33587729	0.28	0.424383	0.305556	0.0522	0.06175
8	33587755		8_33587755	0.3	0.450612	0.342857	0.0249	0.128142
8	35370150	35462538	transmembrane emp24 domain-containing protein 2-like n=1 Tax=Pomacea canaliculata TaxID=400727 RepID=UPI000D72AA47
8	35387557		8_35387557	0	0.48	0.4	-0.002	0.388912
8	35414436		8_35414436	0	0.4982	0.47	-0.0274	0.876266
8	36543953	36553952	Sulfotransferase 1A1 n=1 Tax=Mizuhopecten yessoensis TaxID=6573 RepID=A0A210R1L3_MIZYE
8	36551203		8_36551203	0	0.4998	0.49	-0.0246	0.715206
8	36552035		8_36552035	0	0.4928	0.44	-0.0082	0.455036
8	36811864	36855984	17-beta-hydroxysteroid dehydrogenase 14 n=3 Tax=Pectinidae TaxID=6566 RepID=A0A385J6W9_MIZYE
8	36845781		8_36845781	0	0.4992	0.48	0.0324	0.315286
8	36853969		8_36853969	0	0.4608	0.36	0.0054	0.331508
8	37954139	37993046	Serine/threonine-protein phosphatase n=2 Tax=Pectinidae TaxID=6566 RepID=A0A210PUW3_MIZYE
8	37960813		8_37960813	0	0.4872	0.42	-0.0242	0.759318
8	37972400		8_37972400	0	0.4608	0.36	-0.0166	0.64667
8	38197642	38274872	Lipopolysaccharide and beta-1,3-glucan-binding protein n=1 Tax=Meretrix meretrix TaxID=291251 RepID=T1SH41_MERMT
8	38225503		8_38225503	0.08	0.352316	0.228261	-0.0234	0.353306
8	38225543		8_38225543	0.12	0.406767	0.284091	-0.0161	0.21053
8	38595442	38633714	E3 ubiquitin-protein ligase Midline-1-like n=1 Tax=Crassostrea virginica TaxID=6565 RepID=UPI000BAE81D2
8	38596250		8_38596250	0.02	0.399209	0.27551	-0.0014	0.3739
8	38629164		8_38629164	0.02	0.499167	0.479592	-0.0261	0.967178
9	1994498	2016540	Tripartite motif-containing protein 59 n=3 Tax=Pectinidae TaxID=6566 RepID=A0A210QU84_MIZYE
9	2013549		9_2013549	0	0.4902	0.43	-0.019	0.51966
9	2013735		9_2013735	0	0.3942	0.27	-0.0031	0.371546
9	2512233	2524834	peroxisomal NADH pyrophosphatase NUDT12 n=2 Tax=Crassostrea gigas TaxID=29159 RepID=UPI00148A7651
9	2512719		9_2512719	0	0.4992	0.48	0.0139	0.267598
9	2512840		9_2512840	0	0.4758	0.39	-0.0266	0.810548
9	2524988	2545393	lon protease homolog, mitochondrial-like n=1 Tax=Aplysia californica TaxID=6500 RepID=UPI00065C17B5
9	2525574		9_2525574	0	0.4902	0.43	0.0921	0.017396
9	2531286		9_2531286	0	0.5	0.5	-0.0179	0.69388
9	2632191	2648274	Ceroid-lipofuscinosis neuronal protein 6 n=2 Tax=Pectinidae TaxID=6566 RepID=A0A210QUB5_MIZYE
9	2639817		9_2639817	0	0.4422	0.33	0.0327	0.187112
9	2646982		9_2646982	0.06	0.485514	0.414894	-0.0378	0.750042
9	3596625	3612783	D-galactoside-specific lectin n=2 Tax=Mizuhopecten yessoensis TaxID=6573 RepID=A0A210QDU7_MIZYE
9	3605272		9_3605272	0.18	0.433076	0.317073	0.0544	0.06565
9	3611043		9_3611043	0.22	0.393491	0.269231	-0.0316	0.395256
9	4696071	4725881	HERC2-like protein 3 n=2 Tax=Mizuhopecten yessoensis TaxID=6573 RepID=A0A210QDP7_MIZYE
9	4697918		9_4697918	0	0.4998	0.49	-0.0186	0.564434
9	4697947		9_4697947	0	0.5	0.5	-0.0208	0.560612
9	5735558	5739538	ML domain-containing protein n=1 Tax=Lottia gigantea TaxID=225164 RepID=V4A6Z9_LOTGI
9	5738080		9_5738080	0	0.4902	0.43	0.0335	0.108404
9	5738095		9_5738095	0	0.5	0.5	-0.0222	0.646626
9	5861726	5863437	Histone H1-delta n=2 Tax=Crassostrea gigas TaxID=29159 RepID=K1P7W5_CRAGI
9	5862508		9_5862508	0	0.1302	0.07	0.0303	0.151998
9	5862973		9_5862973	0	0.1302	0.07	0.0215	0.17854
9	12516401	12533739	Perilipin-2 n=4 Tax=Mizuhopecten yessoensis TaxID=6573 RepID=A0A210QYY9_MIZYE
9	12525414		9_12525414	0	0.4662	0.37	0.0142	0.260044
9	12533372		9_12533372	0	0.455	0.35	-0.0383	0.774058
9	14451739	14470668	ubiquitin-conjugating enzyme E2 R2 n=2 Tax=Crassostrea TaxID=6564 RepID=UPI0005C359F7
9	14452408		9_14452408	0	0.495	0.45	0.0527	0.06895
9	14452580		9_14452580	0	0.3942	0.27	0.0503	0.037572
9	15239428	15244453	Phospholipase A2 isozymes PA3A/PA3B/PA5 n=1 Tax=Mizuhopecten yessoensis TaxID=6573 RepID=A0A210QH52_MIZYE
9	15240582		9_15240582	0	0.4872	0.42	-0.0323	0.487286
9	15240589		9_15240589	0	0.4968	0.46	-0.0295	0.543288
9	16459050	16540761	Myocyte-specific enhancer factor 2A n=6 Tax=Crassostrea TaxID=6564 RepID=K1QI00_CRAGI
9	16464760		9_16464760	0	0.4992	0.48	0.0344	0.104672
9	16486226		9_16486226	0	0.4032	0.28	-0.0069	0.381338
9	18571462	18584907	T-complex protein 1 subunit gamma n=3 Tax=Crassostrea TaxID=6564 RepID=K1R466_CRAGI
9	18578314		9_18578314	0	0.4608	0.36	-0.0216	0.749338
9	18578338		9_18578338	0	0.4872	0.42	0.0085	0.35607
9	19206826	19230000	very long-chain acyl-CoA synthetase-like n=1 Tax=Crassostrea virginica TaxID=6565 RepID=UPI000BAE907C
9	19207693		9_19207693	0	0.3848	0.26	-0.0323	0.917464
9	19207756		9_19207756	0	0.3848	0.26	-0.021	0.708958
9	20009348	20025286	vascular cell adhesion protein 1-like n=1 Tax=Nilaparvata lugens TaxID=108931 RepID=UPI000B97F759
9	20015821		9_20015821	0	0.455	0.35	0.006	0.272522
9	20015847		9_20015847	0	0.4662	0.37	0.0402	0.073374
9	20173275	20186077	serum response factor-binding protein 1 n=1 Tax=Crassostrea gigas TaxID=29159 RepID=UPI00148A59DC
9	20178363		9_20178363	0	0.495	0.45	0.0555	0.049734
9	20178364		9_20178364	0	0.495	0.45	0.0555	0.04811
9	20648678	20678993	enhancer of mRNA-decapping protein 3-like n=2 Tax=Pectinidae TaxID=6566 RepID=UPI000B45770E
9	20652083		9_20652083	0	0.495	0.45	0.0218	0.162768
9	20652781		9_20652781	0	0.5	0.5	0.043	0.077368
9	21168413	21186725	Protein disulfide-isomerase n=4 Tax=Crassostrea TaxID=6564 RepID=K1Q7T5_CRAGI
9	21176351		9_21176351	0	0.4902	0.43	0.0074	0.298456
9	21184411		9_21184411	0	0.4982	0.47	-0.001	0.313688
9	21939558	21992164	GRAM domain-containing protein n=1 Tax=Lottia gigantea TaxID=225164 RepID=V3ZXY9_LOTGI
9	21982850		9_21982850	0	0.4992	0.48	0.0223	0.1718
9	21988895		9_21988895	0.24	0.316828	0.197368	0.1102	0.003016
9	22224843	22438356	Zinc finger protein 609 n=6 Tax=Pectinidae TaxID=6566 RepID=A0A210QI50_MIZYE
9	22260640		9_22260640	0	0.5	0.5	-0.0151	0.52418
9	22260859		9_22260859	0	0.4838	0.41	0.0569	0.058682
9	22579706	22584404	Complement C1Q-like protein n=1 Tax=Hyriopsis cumingii TaxID=165450 RepID=A0A1L2FYM6_HYRCU
9	22580577		9_22580577	0	0.18	0.1	0.0481	0.030026
9	22583980		9_22583980	0.06	0.119511	0.0638298	-0.0235	0.65124
9	23247826	23314172	solute carrier family 12 member 3-like isoform X1 n=2 Tax=Crassostrea virginica TaxID=6565 RepID=UPI000BB05278
9	23248454		9_23248454	0	0.4928	0.44	-0.0114	0.48959
9	23279084		9_23279084	0	0.5	0.5	-0.0328	0.906874
9	23949923	23999095	Aldedh domain-containing protein n=1 Tax=Lottia gigantea TaxID=225164 RepID=V4BLL6_LOTGI
9	23974124		9_23974124	0	0.4712	0.38	0.0024	0.243478
9	23997186		9_23997186	0.02	0.486672	0.418367	0.0186	0.188156
9	25744505	25768908	H15 domain-containing protein n=1 Tax=Lottia gigantea TaxID=225164 RepID=V3ZM20_LOTGI
9	25747558		9_25747558	0	0.4352	0.32	-0.051	0.925904
9	25747797		9_25747797	0	0.375	0.25	-0.012	0.434568
9	26105501	26125106	Clam ADP-ribosylating protein CARP-1 n=1 Tax=Meretrix lamarckii TaxID=157363 RepID=Q0KK23_9BIVA
9	26109653		9_26109653	0	0.495	0.45	-0.0059	0.378164
9	26109695		9_26109695	0	0.455	0.35	0.0002	0.35505
9	26304725	26310026	Tubulin-specific chaperone A n=2 Tax=Branchiostoma TaxID=7737 RepID=C3Y1Q3_BRAFL
9	26305143		9_26305143	0.04	0.482422	0.40625	-0.0185	0.434814
9	26309933		9_26309933	0	0.2822	0.17	-0.0099	0.327232
9	27414776	27425439	Sorbitol dehydrogenase n=2 Tax=Pectinidae TaxID=6566 RepID=A0A210PWF1_MIZYE
9	27421386		9_27421386	0	0.4278	0.31	0.0356	0.124212
9	27421434		9_27421434	0	0.4758	0.39	0.0544	0.044664
9	31082982	31160370	Kelch domain-containing protein 1 n=1 Tax=Mizuhopecten yessoensis TaxID=6573 RepID=A0A210QZL4_MIZYE
9	31126578		9_31126578	0	0.4998	0.49	-0.0346	1
9	31126636		9_31126636	0	0.4998	0.49	-0.0299	0.903616
9	31947842	31966523	Aquaglyceroporin-3 n=3 Tax=Mizuhopecten yessoensis TaxID=6573 RepID=A0A210QFK8_MIZYE
9	31953746		9_31953746	0	0.4998	0.49	-0.0329	0.788082
9	31957427		9_31957427	0	0.4662	0.37	-0.0208	0.626872
9	32181725	32266079	peroxisomal multifunctional enzyme type 2 isoform X2 n=1 Tax=Crassostrea gigas TaxID=29159 RepID=UPI0009750E9C
9	32195638		9_32195638	0	0.4992	0.48	0.0021	0.306434
9	32215927		9_32215927	0	0.4902	0.43	0.0016	0.355902
9	34201627	34217351	Nicalin-1 n=4 Tax=Crassostrea TaxID=6564 RepID=K1R1W9_CRAGI
9	34202746		9_34202746	0	0.3648	0.24	-0.0377	0.95463
9	34202828		9_34202828	0	0.4928	0.44	-0.011	0.592558
9	34393103	34405000	nuclear receptor 2C2-associated protein isoform X2 n=1 Tax=Petromyzon marinus TaxID=7757 RepID=UPI001402B393
9	34395411		9_34395411	0	0.455	0.35	-0.0011	0.406422
9	34396132		9_34396132	0	0.4968	0.46	0.0818	0.019572
9	34712346	34721347	cyclic AMP-responsive element-binding protein 3-like protein 3 isoform X2 n=2 Tax=Pecten maximus TaxID=6579 RepID=UPI00145860B7
9	34714048		9_34714048	0	0.3542	0.23	0.0747	0.01311
9	34714306		9_34714306	0	0.4992	0.48	0.0421	0.094614
9	35258981	35270994	mesenchyme-specific cell surface glycoprotein-like isoform X1 n=3 Tax=Pecten maximus TaxID=6579 RepID=UPI001458312B
9	35270896		9_35270896	0	0.18	0.1	-0.0274	1
9	37522113	37581921	Polypeptide N-acetylgalactosaminyltransferase n=1 Tax=Mizuhopecten yessoensis TaxID=6573 RepID=A0A210QVQ7_MIZYE
9	37526174		9_37526174	0	0.4422	0.33	0.041	0.088366
9	37526232		9_37526232	0	0.4422	0.33	0.0143	0.229254
9	38303534	38348281	Gamma-tubulin complex component n=2 Tax=Pectinidae TaxID=6566 RepID=A0A210PYR3_MIZYE
9	38312918		9_38312918	0	0.495	0.45	0.0583	0.058662
9	38312932		9_38312932	0	0.4992	0.48	-0.0206	0.580106
9	38410203	38434482	LOW QUALITY PROTEIN: DNA mismatch repair protein Msh3-like n=1 Tax=Pecten maximus TaxID=6579 RepID=UPI001458765E
9	38414141		9_38414141	0	0.4758	0.39	-0.0372	0.965066
9	38414171		9_38414171	0	0.4998	0.49	0.0015	0.314372
10	234882	269789	Insulin-like growth factor binding protein 5 n=1 Tax=Sinonovacula constricta TaxID=98310 RepID=A0A0U2Q6C9_SINCO
10	251287		10_251287	0	0.4712	0.38	-0.0404	0.931944
10	254478		10_254478	0	0.4902	0.43	0.008	0.265868
10	1731046	1751559	LOW QUALITY PROTEIN: heme-binding protein 2-like n=1 Tax=Pecten maximus TaxID=6579 RepID=UPI00145882A4
10	1731406		10_1731406	0	0.4928	0.44	0.1055	0.012346
10	1732137		10_1732137	0	0.4872	0.42	0.0941	0.02039
10	3055655	3076159	Hemicentin-1 n=3 Tax=Crassostrea gigas TaxID=29159 RepID=K1PRG5_CRAGI
10	3066416		10_3066416	0	0.4758	0.39	-0.017	0.52619
10	3066424		10_3066424	0	0.4968	0.46	-0.0057	0.472588
10	3389381	3430903	cadherin-like and PC-esterase domain-containing protein 1 n=1 Tax=Pecten maximus TaxID=6579 RepID=UPI001457FD85
10	3391112		10_3391112	0	0.4712	0.38	-0.0044	0.472972
10	3392040		10_3392040	0	0.3318	0.21	-0.0145	0.572374
10	3557330	3570437	Eukaryotic translation initiation factor 4E type 3-A n=2 Tax=Pectinidae TaxID=6566 RepID=A0A210PMP4_MIZYE
10	3560693		10_3560693	0	0.4982	0.47	-0.0127	0.736396
10	3563637		10_3563637	0	0.4928	0.44	-0.0238	0.68705
10	4587606	4735069	RNA helicase n=2 Tax=Mizuhopecten yessoensis TaxID=6573 RepID=A0A210QWW2_MIZYE
10	4592063		10_4592063	0	0.5	0.5	-0.0091	0.461846
10	4595563		10_4595563	0	0.4982	0.47	0.0098	0.288504
10	5083766	5105043	Caveolin n=5 Tax=Pectinidae TaxID=6566 RepID=A0A210QWU1_MIZYE
10	5102705		10_5102705	0.06	0.238343	0.138298	-0.0031	0.40911
10	5103037		10_5103037	0	0.1472	0.08	-0.0074	0.527084
10	5122575	5147243	caveolin-1-like n=1 Tax=Crassostrea virginica TaxID=6565 RepID=UPI000BAF3954
10	5125180		10_5125180	0.06	0.477365	0.393617	0.0436	0.058912
10	5125900		10_5125900	0.04	0.499132	0.479167	0.0158	0.163262
10	5170711	5174590	Caveolin n=4 Tax=Lottia gigantea TaxID=225164 RepID=V4ALP9_LOTGI
10	7099707	7101331	B-cell translocation gene 1 n=2 Tax=Crassostrea gigas TaxID=29159 RepID=B5TRS0_CRAGI
10	7664283	7690716	Sigma glutathione S-transferase 3 n=1 Tax=Ruditapes philippinarum TaxID=129788 RepID=G9HSP4_RUDPH
10	7673046		10_7673046	0	0.4998	0.49	-0.0217	0.66986
10	7673487		10_7673487	0	0.4982	0.47	-0.0013	0.27588
10	8039631	8045394	transforming growth factor-beta-induced protein ig-h3-like n=2 Tax=Crassostrea virginica TaxID=6565 RepID=UPI000BAF0850
10	8039822		10_8039822	0.1	0.487901	0.422222	-0.0597	1
10	8039862		10_8039862	0.1	0.493827	0.444444	-0.0549	0.857856
10	8752012	8763114	Shell protein-4 n=1 Tax=Mytilus coruscus TaxID=42192 RepID=A0A0G2YN89_MYTCO
10	8760272		10_8760272	0.02	0.408163	0.285714	-0.033	0.625354
10	8762515		10_8762515	0.04	0.46875	0.375	-0.0346	0.76646
10	8773229	8787850	Shell protein-4 n=1 Tax=Mytilus coruscus TaxID=42192 RepID=A0A0G2YN89_MYTCO
10	11183330	11249758	C-type lectin n=2 Tax=Meretrix meretrix TaxID=291251 RepID=A0A173DQE7_MERMT
10	11229326		10_11229326	0.24	0.450139	0.342105	-0.0047	0.280718
10	11229359		10_11229359	0.24	0.399931	0.276316	-0.0404	0.596728
10	12208221	12237091	sulfatase-modifying factor 1-like n=1 Tax=Aplysia californica TaxID=6500 RepID=UPI000359517A
10	12214345		10_12214345	0	0.4992	0.48	-0.0235	0.815488
10	12217562		10_12217562	0.04	0.46875	0.375	-0.0208	0.474398
10	12520776	12527339	fibropellin-1-like n=1 Tax=Stylophora pistillata TaxID=50429 RepID=UPI000C04F70F
10	12521673		10_12521673	0	0.4998	0.49	0.0095	0.255964
10	12524662		10_12524662	0	0.4928	0.44	-0.0013	0.32059
10	13639220	13671029	Glucose-regulated protein 94 n=1 Tax=Crassostrea gigas TaxID=29159 RepID=A5LGG7_CRAGI
10	13639611		10_13639611	0	0.3648	0.24	-0.0005	0.342368
10	13639634		10_13639634	0	0.2952	0.18	0.007	0.257964
10	15477359	15485103	26S proteasome non-ATPase regulatory subunit 6-like n=2 Tax=Pectinidae TaxID=6566 RepID=UPI000B457CAA
10	15478845		10_15478845	0	0.4422	0.33	-0.0048	0.65814
10	15484531		10_15484531	0	0.4982	0.47	-0.0278	0.966784
10	15768306	15795105	pre-rRNA-processing protein TSR1 homolog isoform X1 n=4 Tax=Crassostrea virginica TaxID=6565 RepID=UPI000BAF6358
10	15779335		10_15779335	0	0.455	0.35	0.0117	0.293132
10	15787344		10_15787344	0	0.4998	0.49	-0.013	0.621832
10	15838745	15858594	kelch-like protein 10 n=2 Tax=Crassostrea virginica TaxID=6565 RepID=UPI000BAF6F2B
10	15842759		10_15842759	0.02	0.496668	0.459184	-0.0299	1
10	15842896		10_15842896	0	0.4488	0.34	-0.0296	0.895054
10	15859108	15871382	Phage lysozyme 2 n=1 Tax=Meretrix meretrix TaxID=291251 RepID=A0A1N7TAT8_MERMT
10	15867415		10_15867415	0	0.495	0.45	0.0023	0.231436
10	15870599		10_15870599	0.02	0.5	0.5	0.0108	0.149916
10	15917800	15927360	U6 snRNA-associated Sm-like protein LSm8 n=4 Tax=Pteriomorphia TaxID=6545 RepID=A0A210PZR9_MIZYE
10	15926073		10_15926073	0	0.4902	0.43	-0.0123	0.663758
10	15926336		10_15926336	0	0.4928	0.44	0.0122	0.301894
10	16478513	16540755	guanylate cyclase soluble subunit beta-2-like n=1 Tax=Pecten maximus TaxID=6579 RepID=UPI0014588084
10	16479472		10_16479472	0.02	0.324865	0.204082	0.0024	0.268674
10	16482167		10_16482167	0.02	0.439817	0.326531	-0.0117	0.447272
10	18950281	18962552	N-acyl-phosphatidylethanolamine-hydrolyzing phospholipase D-like n=2 Tax=Crassostrea virginica TaxID=6565 RepID=UPI000BAE7A78
10	18954828		10_18954828	0	0.48	0.4	-0.0271	0.869804
10	18962350		10_18962350	0	0.495	0.45	0.0696	0.03795
10	19660126	19676817	heat shock 70 kDa protein 14 n=1 Tax=Lingula unguis TaxID=7574 RepID=A0A1S3JS87_LINUN
10	19660532		10_19660532	0	0.4838	0.41	0.0861	0.017384
10	19660563		10_19660563	0	0.495	0.45	0.0192	0.159994
10	19811590	19821498	Mitochondrial carnitine/acylcarnitine carrier protein n=3 Tax=Crassostrea TaxID=6564 RepID=K1Q3V9_CRAGI
10	19812158		10_19812158	0	0.4662	0.37	-0.009	0.405472
10	19812160		10_19812160	0	0.4608	0.36	-0.0146	0.535602
10	19822289	19839444	Interferon-related developmental regulator 1 n=2 Tax=Pectinidae TaxID=6566 RepID=A0A210PYJ6_MIZYE
10	19823090		10_19823090	0	0.495	0.45	-0.0241	0.870852
10	19823673		10_19823673	0	0.3942	0.27	-0.015	0.551488
10	20816696	20846765	Mitosis inhibitor protein kinase wee1 n=2 Tax=Crassostrea gigas TaxID=29159 RepID=K1Q742_CRAGI
10	20845198		10_20845198	0.12	0.498967	0.477273	0.1358	0.004126
10	20845255		10_20845255	0.12	0.338585	0.215909	0.1409	0.008892
10	20879918	20918721	dimethylaniline monooxygenase [N-oxide-forming] 3-like n=1 Tax=Pecten maximus TaxID=6579 RepID=UPI001458CD1A
10	20882758		10_20882758	0.02	0.483132	0.408163	-0.0352	0.702088
10	20888064		10_20888064	0	0.48	0.4	-0.0458	1
10	21181121	21191377	cathepsin L1 n=1 Tax=Lingula unguis TaxID=7574 RepID=A0A1S3JXR9_LINUN
10	21185439		10_21185439	0.02	0.496668	0.459184	-0.0391	0.902576
10	21191195		10_21191195	0.02	0.498126	0.469388	-0.0251	0.758896
10	21486524	21498001	leucine-rich repeat and IQ domain-containing protein 4-like n=2 Tax=Crassostrea gigas TaxID=29159 RepID=UPI0009751DA6
10	21497145		10_21497145	0.08	0.405482	0.282609	0.0252	0.107364
10	21497380		10_21497380	0.06	0.461747	0.361702	-0.0298	0.583224
10	21527481	21537552	mesoderm-specific transcript protein-like n=1 Tax=Crassostrea virginica TaxID=6565 RepID=UPI000BAFD9E5
10	21536238		10_21536238	0	0.2408	0.14	-0.0224	0.874086
10	21536245		10_21536245	0	0.2408	0.14	-0.0224	0.871862
10	21668327	21714680	molybdate-anion transporter-like isoform X1 n=2 Tax=Mizuhopecten yessoensis TaxID=6573 RepID=UPI000B4598B7
10	21677198		10_21677198	0	0.455	0.35	-0.0273	0.576818
10	21677289		10_21677289	0	0.4278	0.31	0.0325	0.070076
10	23245611	23302207	Seryl-tRNA synthetase n=3 Tax=Octopus TaxID=6643 RepID=A0A0L8GTR7_OCTBM
10	23247455		10_23247455	0	0.4992	0.48	-0.0188	0.76596
10	23286715		10_23286715	0	0.4902	0.43	0.127	0.0049
10	23404422	23419242	Stress response protein NhaX n=1 Tax=Mizuhopecten yessoensis TaxID=6573 RepID=A0A210QAQ7_MIZYE
10	23415115		10_23415115	0	0.3942	0.27	-0.0095	0.355072
10	23416881		10_23416881	0	0.4998	0.49	0.0041	0.318186
10	23420316	23461687	Chitinase n=1 Tax=Lymnaea stagnalis TaxID=6523 RepID=A0A193PDE7_LYMST
10	23420832		10_23420832	0	0.3848	0.26	-0.0266	0.77161
10	23421373		10_23421373	0	0.4662	0.37	0.0477	0.081714
10	23669730	23673108	perlucin-like protein n=2 Tax=Crassostrea virginica TaxID=6565 RepID=UPI000BAF6E99
10	23671987		10_23671987	0	0.4422	0.33	0.0275	0.14835
10	23672931		10_23672931	0	0.4712	0.38	-0.0404	0.931284
10	23848722	23870620	protein SSUH2 homolog isoform X1 n=3 Tax=Pecten maximus TaxID=6579 RepID=UPI001457E9B5
10	23851495		10_23851495	0	0.4608	0.36	0.0146	0.247678
10	23859186		10_23859186	0	0.375	0.25	-0.0362	0.764238
10	26352558	26363213	kelch domain-containing protein 8B-like n=1 Tax=Aplysia californica TaxID=6500 RepID=UPI000359D4AF
10	26353352		10_26353352	0	0.4872	0.42	-0.0153	0.54055
10	26354309		10_26354309	0	0.4982	0.47	-0.0062	0.317352
10	26402588	26404860	Metallothionein 1 n=2 Tax=Cerastoderma TaxID=55709 RepID=A5A2I2_CERED
10	27278463	27294838	cysteine-rich with EGF-like domain protein 2-B isoform X1 n=2 Tax=Crassostrea gigas TaxID=29159 RepID=UPI00148A8EA8
10	27286138		10_27286138	0	0.4992	0.48	-0.0069	0.598614
10	27292448		10_27292448	0	0.4968	0.46	0.0034	0.292216
10	28524792	28550988	Hairy/enhancer-of-split related with YRPW motif protein n=2 Tax=Mizuhopecten yessoensis TaxID=6573 RepID=A0A210PZW2_MIZYE
10	28545799		10_28545799	0	0.4902	0.43	-0.0134	0.502186
10	28545944		10_28545944	0	0.4902	0.43	-0.0242	0.844324
10	28810031	28906095	cytosolic 10-formyltetrahydrofolate dehydrogenase-like isoform X1 n=8 Tax=Crassostrea TaxID=6564 RepID=UPI00148A2E29
10	28873699		10_28873699	0.3	0.450612	0.342857	0.0993	0.010644
10	28876473		10_28876473	0	0.3318	0.21	0.009	0.313152
10	30210720	30251618	Cytochrome P450 2J6 n=2 Tax=Crassostrea gigas TaxID=29159 RepID=K1QXI3_CRAGI
10	30228569		10_30228569	0.06	0.455636	0.351064	-0.0403	0.961982
10	30234943		10_30234943	0.06	0.461747	0.361702	-0.0379	0.925122
10	30610187	30621374	monoacylglycerol lipase ABHD6-like n=1 Tax=Pecten maximus TaxID=6579 RepID=UPI001458626B
10	30619065		10_30619065	0	0.4872	0.42	0.0643	0.035372
10	30619312		10_30619312	0.02	0.439817	0.326531	0.2291	0.0001
10	33335923	33363018	Protein MCM10 homolog n=1 Tax=Mizuhopecten yessoensis TaxID=6573 RepID=A0A210PHX2_MIZYE
10	33341338		10_33341338	0	0.4992	0.48	0.0937	0.015626
10	33341360		10_33341360	0	0.42	0.3	0.0411	0.081642
10	35280222	35299555	tryptase-2-like n=1 Tax=Crassostrea virginica TaxID=6565 RepID=UPI000BAF17D5
10	35291799		10_35291799	0	0.48	0.4	0.0079	0.315172
10	35291872		10_35291872	0	0.4998	0.49	-0.0134	0.564444
10	35440810	35449730	Dolichyl-diphosphooligosaccharide--protein glycosyltransferase subunit 1 n=2 Tax=Pectinidae TaxID=6566 RepID=A0A210PHZ0_MIZYE
10	35445664		10_35445664	0	0.4712	0.38	0.0024	0.368126
10	35447767		10_35447767	0	0.4838	0.41	0.0233	0.170042
10	35799179	35890200	Transmembrane protein 43 n=2 Tax=Mizuhopecten yessoensis TaxID=6573 RepID=A0A210R4P0_MIZYE
10	35829467		10_35829467	0	0.4872	0.42	-0.0293	0.841276
10	35835044		10_35835044	0	0.4838	0.41	-0.0111	0.595348
10	36311330	36339968	Imidazolonepropionate hydrolase n=2 Tax=Pectinidae TaxID=6566 RepID=A0A210PPQ7_MIZYE
10	36314261		10_36314261	0	0.4928	0.44	0.0194	0.16551
10	36317399		10_36317399	0	0.3318	0.21	-0.0184	0.569272
10	36693798	36724986	Hcy-binding domain-containing protein n=1 Tax=Elysia chlorotica TaxID=188477 RepID=A0A3S1A2I1_ELYCH
10	36706242		10_36706242	0	0.5	0.5	-0.0056	0.309172
10	36706717		10_36706717	0.16	0.489796	0.428571	0.0403	0.097438
10	37181386	37188716	Ribonuclease P n=1 Tax=Mizuhopecten yessoensis TaxID=6573 RepID=A0A210PF19_MIZYE
10	37186024		10_37186024	0	0.4968	0.46	-0.023	0.790596
10	37187095		10_37187095	0	0.4968	0.46	-0.0213	0.58232
10	37543561	37621745	proton myo-inositol cotransporter-like isoform X1 n=2 Tax=Pecten maximus TaxID=6579 RepID=UPI0014581860
10	37612271		10_37612271	0.12	0.483471	0.409091	0.0776	0.020568
10	37612300		10_37612300	0.16	0.489796	0.428571	0.0589	0.032484
11	2459157	2497236	ATP-dependent RNA helicase DHX8 n=2 Tax=Pectinidae TaxID=6566 RepID=A0A210QG45_MIZYE
11	2462429		11_2462429	0	0.4998	0.49	-0.0063	0.373214
11	2462484		11_2462484	0	0.4928	0.44	0.0297	0.11715
11	2518191	2532478	Vesicular, overexpressed in cancer, prosurvival protein 1 n=1 Tax=Mizuhopecten yessoensis TaxID=6573 RepID=A0A210PU93_MIZYE
11	2521391		11_2521391	0	0.4838	0.41	-0.0485	0.966324
11	2521494		11_2521494	0	0.4662	0.37	-0.0359	0.929812
11	2618805	2626708	Metalloendopeptidase n=1 Tax=Mizuhopecten yessoensis TaxID=6573 RepID=A0A210QK76_MIZYE
11	2619058		11_2619058	0	0.32	0.2	-0.0128	0.566308
11	2619576		11_2619576	0.22	0.473373	0.384615	0.0571	0.09898
11	4136833	4183076	heat shock 70 kDa protein 12B-like n=2 Tax=Crassostrea virginica TaxID=6565 RepID=UPI000BB08E8D
11	4181707		11_4181707	0.04	0.5	0.5	-0.0247	0.541086
11	4181905		11_4181905	0.1	0.458272	0.355556	0.0286	0.093896
11	5238546	5262988	Serine/threonine-protein kinase 16 n=2 Tax=Pectinidae TaxID=6566 RepID=A0A210PWQ4_MIZYE
11	5241934		11_5241934	0	0.4422	0.33	-0.0091	0.319166
11	5242814		11_5242814	0	0.4982	0.47	-0.0025	0.15492
11	5297134	5324335	Malate dehydrogenase n=3 Tax=Mizuhopecten yessoensis TaxID=6573 RepID=A0A210PSJ0_MIZYE
11	5305365		11_5305365	0	0.4902	0.43	-0.0366	0.902982
11	5305368		11_5305368	0	0.495	0.45	-0.0282	0.683184
11	5812579	5900349	hypothetical protein n=1 Tax=Escherichia coli TaxID=562 RepID=UPI00142F6E1B
11	5818451		11_5818451	0	0.4662	0.37	-0.0509	0.862752
11	5854383		11_5854383	0	0.4118	0.29	-0.03	0.694156
11	6838679	6868040	Polypeptide N-acetylgalactosaminyltransferase n=1 Tax=Pomacea canaliculata TaxID=400727 RepID=A0A2T7PAH9_POMCA
11	6862186		11_6862186	0	0.4712	0.38	0.0471	0.05999
11	6865198		11_6865198	0	0.4968	0.46	-0.0215	0.623726
11	7633400	7691638	Endo-1,3-beta-D-glucanase n=1 Tax=Tapes literata TaxID=676964 RepID=F6LP52_9BIVA
11	7651511		11_7651511	0	0.4838	0.41	0.0464	0.068794
11	7651817		11_7651817	0	0.4992	0.48	-0.0139	0.476596
11	10141227	10145419	beta,beta-carotene 15,15-dioxygenase-like n=1 Tax=Pecten maximus TaxID=6579 RepID=UPI001458452B
11	10144908		11_10144908	0.1	0.499012	0.477778	0.0123	0.177084
11	10144926		11_10144926	0.12	0.499742	0.488636	-0.0059	0.379156
11	10809090	10827659	ATP-binding cassette sub-family B member 6, mitochondrial n=2 Tax=Pectinidae TaxID=6566 RepID=A0A210PRI9_MIZYE
11	10811608		11_10811608	0	0.4838	0.41	-0.0367	1
11	10811611		11_10811611	0	0.4712	0.38	-0.0298	0.809462
11	13477804	13496004	Proteasome activator complex subunit 3 n=3 Tax=Crassostrea TaxID=6564 RepID=K1RFU6_CRAGI
11	13478124		11_13478124	0	0.4662	0.37	0.0026	0.392368
11	13478210		11_13478210	0	0.4422	0.33	0.0733	0.024216
11	15436190	15455753	heparan-alpha-glucosaminide N-acetyltransferase-like n=1 Tax=Crassostrea virginica TaxID=6565 RepID=UPI000BB07645
11	15450989		11_15450989	0	0.4758	0.39	-0.0162	0.699368
11	15454617		11_15454617	0	0.4982	0.47	-0.0099	0.601818
11	18133183	18154623	hillarin-like isoform X1 n=4 Tax=Crassostrea gigas TaxID=29159 RepID=UPI0005C3746B
11	18139983		11_18139983	0	0.42	0.3	0.007	0.155598
11	18142518		11_18142518	0	0.3848	0.26	-0.0271	0.675496
11	18314881	18351023	Fatty acid amide hydrolase 1 n=1 Tax=Mizuhopecten yessoensis TaxID=6573 RepID=A0A210R773_MIZYE
11	18333500		11_18333500	0	0.4662	0.37	-0.0224	0.80743
11	18336936		11_18336936	0	0.4712	0.38	-0.0215	0.809512
11	18800470	18810279	C-type lectin 1 n=1 Tax=Ruditapes philippinarum TaxID=129788 RepID=A0A451ET86_RUDPH
11	18810130		11_18810130	0	0.4118	0.29	0.0122	0.171214
11	19352301	19369553	Coiled-coil domain-containing protein 47 n=1 Tax=Elysia chlorotica TaxID=188477 RepID=A0A433UEC5_ELYCH
11	19368206		11_19368206	0	0.4928	0.44	-0.0025	0.441254
11	20518458	20553125	CUB and sushi domain-containing protein 3 n=1 Tax=Collichthys lucidus TaxID=240159 RepID=A0A4U5V214_COLLU
11	20548834		11_20548834	0.22	0.499671	0.487179	-0.0375	0.510852
11	21535527	21544118	Aquaporin 11 n=1 Tax=Sinonovacula constricta TaxID=98310 RepID=A0A6G6CYR1_SINCO
11	21541238		11_21541238	0	0.4488	0.34	-0.019	0.739754
11	21541250		11_21541250	0	0.4488	0.34	-0.0248	0.74315
11	22835321	22892430	Adenylate cyclase n=4 Tax=Crassostrea TaxID=6564 RepID=K1QHF9_CRAGI
11	22836150		11_22836150	0	0.4352	0.32	0.0207	0.258962
11	22836427		11_22836427	0	0.42	0.3	0.0005	0.284506
11	23169160	23182669	Protein disulfide-isomerase n=4 Tax=Crassostrea gigas TaxID=29159 RepID=K1QCC9_CRAGI
11	23170351		11_23170351	0	0.4928	0.44	-0.0211	0.685824
11	23170826		11_23170826	0	0.4872	0.42	0.058	0.058494
11	23554779	23575839	NFX1-type zinc finger-containing protein 1-like n=1 Tax=Mizuhopecten yessoensis TaxID=6573 RepID=UPI000B45F399
11	23560047		11_23560047	0	0.455	0.35	-0.0244	0.576614
11	23560119		11_23560119	0	0.4968	0.46	-0.0302	0.642712
11	23658846	23709355	Prolyl 4-hydroxylase subunit alpha-2 n=1 Tax=Mizuhopecten yessoensis TaxID=6573 RepID=A0A210PU50_MIZYE
11	23697458		11_23697458	0	0.4758	0.39	-0.0182	0.675222
11	23697496		11_23697496	0	0.4712	0.38	-0.0305	0.965048
11	24506447	24570423	titin-like isoform X1 n=7 Tax=Pecten maximus TaxID=6579 RepID=UPI0014585808
11	24509787		11_24509787	0	0.4712	0.38	0.0664	0.03862
11	24511909		11_24511909	0	0.48	0.4	-0.0266	0.900104
11	25266212	25292912	LOW QUALITY PROTEIN: ankyrin repeat and zinc finger domain-containing protein 1-like n=1 Tax=Pecten maximus TaxID=6579 RepID=UPI001457F979
11	25277023		11_25277023	0	0.5	0.5	-0.0242	0.847282
11	25280110		11_25280110	0	0.4928	0.44	-0.0202	0.58068
11	25293347	25333980	L-galactose dehydrogenase-like n=1 Tax=Pecten maximus TaxID=6579 RepID=UPI0014587DFD
11	25307161		11_25307161	0	0.2952	0.18	-0.0357	0.945636
11	25308820		11_25308820	0	0.495	0.45	0.0119	0.274496
11	25390782	25414203	Hexosyltransferase n=1 Tax=Lottia gigantea TaxID=225164 RepID=V4AXE2_LOTGI
11	25395603		11_25395603	0	0.4608	0.36	0.0195	0.188552
11	25395754		11_25395754	0	0.4928	0.44	0.0193	0.144772
11	25514154	25567650	probable C-mannosyltransferase DPY19L1 n=1 Tax=Pecten maximus TaxID=6579 RepID=UPI001458C98D
11	25516772		11_25516772	0	0.4998	0.49	-0.0025	0.50964
11	25516774		11_25516774	0	0.5	0.5	0.0091	0.329032
11	27167004	27181816	C1q n=1 Tax=Sinonovacula constricta TaxID=98310 RepID=A0A4P8DYJ0_SINCO
11	27180643		11_27180643	0	0.495	0.45	0.0226	0.17032
11	27180740		11_27180740	0.06	0.494341	0.446809	-0.0117	0.3628
11	28199673	28216673	Chitinase-like lectin n=1 Tax=Littorina littorea TaxID=31216 RepID=A0A0A7RVS6_LITLI
11	28215623		11_28215623	0	0.255	0.15	-0.0178	0.680132
11	29578098	29600183	Heat shock protein 60 n=1 Tax=Ruditapes philippinarum TaxID=129788 RepID=A0A159WJ17_RUDPH
11	29580144		11_29580144	0	0.4998	0.49	-0.0247	0.904368
11	29580596		11_29580596	0	0.4968	0.46	-0.0025	0.873992
11	29758545	29785150	sperm-associated antigen 1-like isoform X1 n=1 Tax=Pecten maximus TaxID=6579 RepID=UPI001458E7D6
11	29761803		11_29761803	0	0.4902	0.43	-0.0399	0.965482
11	29765123		11_29765123	0	0.4712	0.38	-0.0082	0.273964
11	30426250	30486495	BTB domain-containing protein n=1 Tax=Pomacea canaliculata TaxID=400727 RepID=A0A2T7NZP3_POMCA
11	30442747		11_30442747	0	0.4758	0.39	-0.0155	0.654192
11	30461577		11_30461577	0	0.495	0.45	-0.0117	0.544404
11	31121903	31129764	Beta-Ig-H3/fasciclin n=1 Tax=Methanohalobium evestigatum (strain ATCC BAA-1072 / DSM 3721 / NBRC 107634 /OCM 161 / Z-7303) TaxID=644295 RepID=D7E7B7_METEZ
11	31124231		11_31124231	0.26	0.149014	0.0810811	0.0137	0.249644
11	31828216	31846504	C2H2-type domain-containing protein n=2 Tax=Biomphalaria glabrata TaxID=6526 RepID=A0A2C9K235_BIOGL
11	31838425		11_31838425	0	0.4982	0.47	-0.0082	0.623656
11	31846164		11_31846164	0	0.3432	0.22	0.0359	0.067174
12	1629953	1668651	Eukaryotic peptide chain release factor subunit 1 n=10 Tax=Mollusca TaxID=6447 RepID=A0A2C9JCM3_BIOGL
12	1661339		12_1661339	0	0.4712	0.38	0.0026	0.328328
12	1667637		12_1667637	0	0.2262	0.13	0.0499	0.030714
12	1726239	1732593	protein FAM136A-like n=1 Tax=Pomacea canaliculata TaxID=400727 RepID=UPI000D73634D
12	1729176		12_1729176	0	0.4998	0.49	-0.0272	0.712846
12	1729182		12_1729182	0	0.4838	0.41	-0.0031	0.416546
12	6073398	6079717	aminoacyl tRNA synthase complex-interacting multifunctional protein 2-like isoform X2 n=1 Tax=Pecten maximus TaxID=6579 RepID=UPI001458200B
12	6074513		12_6074513	0	0.4998	0.49	0.0108	0.22563
12	6074850		12_6074850	0	0.4982	0.47	0.0571	0.056588
12	8628561	8688552	glycerol-3-phosphate acyltransferase 1, mitochondrial-like isoform X1 n=1 Tax=Pecten maximus TaxID=6579 RepID=UPI0014580818
12	8636978		12_8636978	0	0.4992	0.48	-0.0089	0.427352
12	8637086		12_8637086	0	0.495	0.45	-0.015	0.686854
12	9778574	9816288	GrpE protein homolog n=2 Tax=Mizuhopecten yessoensis TaxID=6573 RepID=A0A210PV47_MIZYE
12	9785714		12_9785714	0	0.5	0.5	-0.0034	0.405066
12	9785743		12_9785743	0	0.4928	0.44	-0.0077	0.662254
12	9820274	9876758	Monocarboxylate transporter 12 n=2 Tax=Mizuhopecten yessoensis TaxID=6573 RepID=A0A210PV19_MIZYE
12	9820556		12_9820556	0.22	0.467127	0.371795	-0.0536	0.794014
12	9820721		12_9820721	0.28	0.453318	0.347222	0.0063	0.32014
12	11207441	11214271	L51_S25_CI-B8 domain-containing protein n=2 Tax=Octopus TaxID=6643 RepID=A0A0L8IC07_OCTBM
12	11213035		12_11213035	0	0.4998	0.49	-0.0005	1
12	11213477		12_11213477	0	0.4422	0.33	-0.036	0.89189
12	12159378	12160453	Cyanophycinase n=1 Tax=Pomacea canaliculata TaxID=400727 RepID=A0A2T7P8M4_POMCA
12	12159698		12_12159698	0	0.4488	0.34	-0.0123	0.469046
12	12159778		12_12159778	0	0.3648	0.24	0.0533	0.046334
12	12799751	12806990	Cyanophycinase n=2 Tax=Crassostrea gigas TaxID=29159 RepID=K1QGR6_CRAGI
12	12799897		12_12799897	0	0.2822	0.17	0.004	0.344658
12	12805403		12_12805403	0	0.455	0.35	-0.0001	0.32777
12	14251052	14288683	RRP12-like protein n=2 Tax=Pectinidae TaxID=6566 RepID=A0A210PHM9_MIZYE
12	14251497		12_14251497	0	0.32	0.2	0.005	0.3641
12	14251538		12_14251538	0	0.4662	0.37	0.0437	0.091186
12	16684545	16699194	Ectonucleoside triphosphate diphosphohydrolase 7 n=2 Tax=Crassostrea gigas TaxID=29159 RepID=K1R526_CRAGI
12	16696006		12_16696006	0	0.4662	0.37	0.0294	0.142616
12	16697383		12_16697383	0	0.4968	0.46	0.0008	0.3257
12	18576518	18585516	Hydroxylysine kinase n=1 Tax=Mizuhopecten yessoensis TaxID=6573 RepID=A0A210R6W0_MIZYE
12	19140350	19220435	T-complex protein 1 subunit eta n=1 Tax=Lingula unguis TaxID=7574 RepID=A0A1S3I1C0_LINUN
12	19142902		12_19142902	0	0.4838	0.41	-0.028	0.840646
12	19174768		12_19174768	0	0.4992	0.48	-0.0255	0.901542
12	20637145	20714526	UPF0668 protein C10orf76 n=2 Tax=Pectinidae TaxID=6566 RepID=A0A210PPF7_MIZYE
12	20677392		12_20677392	0	0.4838	0.41	-0.0067	0.391792
12	20679982		12_20679982	0	0.4998	0.49	-0.0269	0.666104
12	20821696	20846180	solute carrier family 49 member A3-like isoform X1 n=2 Tax=Pecten maximus TaxID=6579 RepID=UPI0014589E65
12	20831776		12_20831776	0	0.4608	0.36	-0.014	0.577542
12	20831810		12_20831810	0	0.4992	0.48	0.0099	0.305512
12	20986369	21021862	delta-like protein B n=1 Tax=Pecten maximus TaxID=6579 RepID=UPI001458E928
12	20988590		12_20988590	0.08	0.352316	0.228261	0.0217	0.194922
12	21005053		12_21005053	0.16	0.481859	0.404762	-0.0397	0.58854
12	21585139	21659371	endothelin-converting enzyme homolog isoform X1 n=4 Tax=Crassostrea virginica TaxID=6565 RepID=UPI000BAF1B04
12	21585601		12_21585601	0	0.3648	0.24	-0.0001	0.25031
12	21585928		12_21585928	0	0.4608	0.36	-0.0175	0.671284
12	22396040	22405677	G-protein coupled receptor 83 n=2 Tax=Pectinidae TaxID=6566 RepID=A0A210QHM7_MIZYE
12	22397505		12_22397505	0.22	0.340894	0.217949	-0.0478	1
12	22398006		12_22398006	0.18	0.176086	0.097561	-0.0171	0.717478
12	23600491	23618023	G-protein coupled receptor 157-like n=1 Tax=Crassostrea virginica TaxID=6565 RepID=UPI000BAF39B6
12	23617652		12_23617652	0.04	0.429688	0.3125	-0.0169	0.578606
12	23617674		12_23617674	0.04	0.494575	0.447917	-0.0417	0.80617
12	24448304	24461111	G_PROTEIN_RECEP_F1_2 domain-containing protein n=1 Tax=Lottia gigantea TaxID=225164 RepID=V3ZA87_LOTGI
12	24448523		12_24448523	0.12	0.499742	0.488636	-0.0392	0.888474
12	24456277		12_24456277	0.04	0.482422	0.40625	-0.0226	0.719644
12	25236770	25364982	Lysine-specific demethylase 3B n=2 Tax=Pectinidae TaxID=6566 RepID=A0A210Q9C8_MIZYE
12	25237305		12_25237305	0	0.4872	0.42	0.0058	0.354096
12	25238153		12_25238153	0	0.4992	0.48	-0.0095	0.383142
12	25520062	25528574	uncharacterized membrane protein C776.05-like isoform X1 n=2 Tax=Crassostrea virginica TaxID=6565 RepID=UPI000BAE9A40
12	25522984		12_25522984	0	0.4998	0.49	-0.0277	0.790604
12	25527553		12_25527553	0	0.495	0.45	-0.0178	0.565198
12	26958941	26966070	Mannan endo-1,4-beta-mannosidase n=4 Tax=Pectinidae TaxID=6566 RepID=A0A210PIB1_MIZYE
12	26961357		12_26961357	0	0.4928	0.44	-0.0067	0.3948
12	26962396		12_26962396	0	0.4758	0.39	-0.0084	0.442902
12	27614412	27660224	Suppressor of fused homolog n=2 Tax=Pectinidae TaxID=6566 RepID=A0A210Q2A3_MIZYE
12	27641113		12_27641113	0	0.4928	0.44	-0.0083	0.505156
12	27641138		12_27641138	0	0.4928	0.44	-0.0211	0.688028
12	28294237	28333162	Poly [ADP-ribose] polymerase 14 n=2 Tax=Mizuhopecten yessoensis TaxID=6573 RepID=A0A210QKL1_MIZYE
12	28307785		12_28307785	0	0.4982	0.47	-0.0203	0.598642
12	28308009		12_28308009	0	0.4992	0.48	-0.0162	0.766672
12	28907256	28941766	DDRGK domain-containing protein 1 n=3 Tax=Crassostrea gigas TaxID=29159 RepID=K1QK73_CRAGI
12	28933533		12_28933533	0.06	0.334993	0.212766	-0.0288	0.55937
12	28933837		12_28933837	0.06	0.5	0.5	-0.0232	0.674316
12	29354294	29410704	Zinc transporter ZIP13 n=1 Tax=Mizuhopecten yessoensis TaxID=6573 RepID=A0A210R1V8_MIZYE
12	29356679		12_29356679	0	0.3648	0.24	0.0062	0.285054
12	29359397		12_29359397	0	0.4662	0.37	0.011	0.240066
12	30314740	30333393	protein mono-ADP-ribosyltransferase PARP14-like isoform X1 n=2 Tax=Pecten maximus TaxID=6579 RepID=UPI0014586EC4
12	30326509		12_30326509	0	0.375	0.25	-0.0128	0.488146
12	30326809		12_30326809	0	0.4992	0.48	0.0233	0.175304
12	30812640	30835521	nascent polypeptide-associated complex subunit alpha, muscle-specific form n=1 Tax=Lingula unguis TaxID=7574 RepID=A0A1S3II71_LINUN
12	30813767		12_30813767	0	0.4998	0.49	-0.0295	0.667316
12	30814630		12_30814630	0	0.4928	0.44	0.0003	0.30798
12	31432840	31477120	MAD protein n=2 Tax=Crassostrea TaxID=6564 RepID=K1RGW6_CRAGI
12	31465208		12_31465208	0	0.3078	0.19	-0.0416	0.895768
12	31466336		12_31466336	0	0.5	0.5	-0.0328	0.906248
12	34139693	34162543	protein CREBRF homolog isoform X3 n=1 Tax=Crassostrea gigas TaxID=29159 RepID=UPI0005C38AC0
12	34139953		12_34139953	0	0.4422	0.33	0.0097	0.240086
12	34140187		12_34140187	0	0.4872	0.42	-0.0119	0.518396
12	35152672	35158418	Fumarylacetoacetate hydrolase domain-containing protein 1 n=5 Tax=Crassostrea TaxID=6564 RepID=K1PQ84_CRAGI
12	35154655		12_35154655	0	0.4488	0.34	-0.0163	0.61775
12	35156571		12_35156571	0	0.4278	0.31	-0.0168	0.78798
12	35542005	35549081	RYamide receptor-like n=1 Tax=Pecten maximus TaxID=6579 RepID=UPI001457EA8C
12	35543386		12_35543386	0	0.4998	0.49	-0.0049	0.460232
12	35544707		12_35544707	0	0.48	0.4	0.0077	0.414766
12	35568264	35671537	Peptidase M12B domain-containing protein n=1 Tax=Lottia gigantea TaxID=225164 RepID=V4AHG6_LOTGI
12	35654436		12_35654436	0	0.4982	0.47	-0.0337	0.90378
12	35666703		12_35666703	0	0.495	0.45	0.0275	0.147054
12	35869107	35899355	Nucleolar complex protein 3 homolog n=1 Tax=Mizuhopecten yessoensis TaxID=6573 RepID=A0A210Q2Y8_MIZYE
12	35870364		12_35870364	0	0.4992	0.48	-0.0037	0.427274
12	35889098		12_35889098	0	0.4662	0.37	0.0195	0.194146
13	477618	501807	ETS-related transcription factor Elf-4 n=1 Tax=Mizuhopecten yessoensis TaxID=6573 RepID=A0A210R3Y7_MIZYE
13	497123		13_497123	0	0.495	0.45	-0.0199	0.712026
13	497242		13_497242	0	0.5	0.5	0.016	0.245814
13	2925980	2932385	CDGSH iron-sulfur domain-containing protein 3, mitochondrial n=1 Tax=Mizuhopecten yessoensis TaxID=6573 RepID=A0A210QQA4_MIZYE
13	2926422		13_2926422	0.26	0.490869	0.432432	0.2269	0.000152
13	2929977		13_2929977	0.14	0.48675	0.418605	-0.0238	0.397406
13	3602700	3620627	Acyl-CoA synthetase family member 2, mitochondrial n=3 Tax=Crassostrea gigas TaxID=29159 RepID=K1QPN1_CRAGI
13	3727302	3744277	Elongation of very long chain fatty acids protein n=1 Tax=Sinonovacula constricta TaxID=98310 RepID=A0A4Y5JTP7_SINCO
13	3736396		13_3736396	0	0.4758	0.39	-0.0127	0.504624
13	3741692		13_3741692	0	0.4968	0.46	-0.0267	0.62479
13	3900544	3915153	Isocitrate dehydrogenase [NADP] n=3 Tax=Crassostrea TaxID=6564 RepID=K1R7T2_CRAGI
13	4809066	4845458	aldehyde dehydrogenase, dimeric NADP-preferring-like isoform X1 n=2 Tax=Pecten maximus TaxID=6579 RepID=UPI0014587FB5
13	4809990		13_4809990	0	0.4488	0.34	0.0307	0.08003
13	4810416		13_4810416	0	0.42	0.3	-0.0243	0.785498
13	5283213	5313741	phosphatidylserine synthase 2-like n=1 Tax=Octopus vulgaris TaxID=6645 RepID=UPI001140E006
13	5300588		13_5300588	0	0.495	0.45	0.035	0.08881
13	5305774		13_5305774	0	0.495	0.45	0.0279	0.108712
13	5498110	5511450	G-patch domain-containing protein n=1 Tax=Fundulus heteroclitus TaxID=8078 RepID=A0A3Q2QXE0_FUNHE
13	5502259		13_5502259	0	0.4928	0.44	-0.0035	0.47972
13	5504460		13_5504460	0	0.4992	0.48	-0.0255	0.902942
13	5714865	5732796	Sulfotransferase family cytosolic 1B member 1 n=1 Tax=Mizuhopecten yessoensis TaxID=6573 RepID=A0A210Q896_MIZYE
13	5717458		13_5717458	0	0.455	0.35	-0.0402	1
13	5717557		13_5717557	0	0.4838	0.41	-0.0258	0.570514
13	7569496	7589862	Putative sulfotransferase (Fragment) n=6 Tax=Ixodidae TaxID=6939 RepID=L7MJR2_9ACAR
13	7579326		13_7579326	0.08	0.446834	0.336957	0.0125	0.111928
13	7583458		13_7583458	0.12	0.46875	0.375	0.0394	0.08118
13	7884328	7920423	syntaxin-7-like n=1 Tax=Pomacea canaliculata TaxID=400727 RepID=UPI000D73A9DC
13	7885367		13_7885367	0	0.3078	0.19	0.0551	0.080524
13	7885463		13_7885463	0	0.48	0.4	0.0065	0.300432
13	8339636	8365447	transmembrane protein 41B-like isoform X1 n=4 Tax=Crassostrea virginica TaxID=6565 RepID=UPI000BAED059
13	8340762		13_8340762	0	0.455	0.35	-0.0227	0.661664
13	8346503		13_8346503	0	0.3648	0.24	-0.0041	0.39468
13	8895958	8898731	galactoside 2-alpha-L-fucosyltransferase 2-like isoform X1 n=2 Tax=Mizuhopecten yessoensis TaxID=6573 RepID=UPI000B45EFA6
13	8896623		13_8896623	0.12	0.495868	0.454545	-0.026	0.526364
13	8897377		13_8897377	0.06	0.155727	0.0851064	0.0928	0.013114
13	9752168	9800600	Fuzzy-like protein n=9 Tax=Crassostrea TaxID=6564 RepID=K1PXH4_CRAGI
13	9790196		13_9790196	0	0.4488	0.34	-0.0163	0.61303
13	9791619		13_9791619	0	0.4838	0.41	0.005	0.314666
13	11569942	11620329	Transcription factor ETV7 n=15 Tax=Crassostrea gigas TaxID=29159 RepID=K1QIK3_CRAGI
13	11570886		13_11570886	0	0.48	0.4	-0.0114	0.484148
13	11570954		13_11570954	0	0.495	0.45	0.0244	0.16153
13	13370084	13417216	sacsin-like isoform X2 n=2 Tax=Crassostrea gigas TaxID=29159 RepID=UPI00148A53A8
13	13371067		13_13371067	0	0.4998	0.49	-0.031	0.934256
13	13372285		13_13372285	0	0.455	0.35	-0.0293	0.863134
13	13805912	13816542	Alpha-L-fucosidase n=2 Tax=Capitella teleta TaxID=283909 RepID=R7TF87_CAPTE
13	13809047		13_13809047	0	0.4352	0.32	-0.0128	0.484152
13	13816389		13_13816389	0	0.4838	0.41	0.0142	0.183142
13	13967719	13988933	transforming growth factor-beta receptor-associated protein 1 n=1 Tax=Crassostrea gigas TaxID=29159 RepID=UPI00148A9B62
13	13976705		13_13976705	0	0.48	0.4	-0.023	0.838998
13	13987553		13_13987553	0	0.4902	0.43	0.0115	0.245392
13	14212193	14237662	secreted frizzled-related protein 3-like n=1 Tax=Pecten maximus TaxID=6579 RepID=UPI0014590C97
13	14212912		13_14212912	0	0.4982	0.47	-0.0151	0.602896
13	14213196		13_14213196	0	0.3432	0.22	0.0212	0.229112
13	14721251	14726621	protein slit-like n=1 Tax=Crassostrea gigas TaxID=29159 RepID=UPI00148AD597
13	14721643		13_14721643	0.12	0.490702	0.431818	-0.0382	0.551806
13	14722349		13_14722349	0.1	0.491111	0.433333	-0.0408	0.703652
13	17203450	17210880	RNA-binding protein 1-like n=1 Tax=Crassostrea virginica TaxID=6565 RepID=UPI000BAF6BD0
13	17208368		13_17208368	0	0.2952	0.18	0.0039	0.341792
13	17208496		13_17208496	0	0.4838	0.41	-0.0225	0.786172
13	17459319	17566354	lactadherin-like isoform X1 n=3 Tax=Pomacea canaliculata TaxID=400727 RepID=UPI000D73729E
13	17460454		13_17460454	0	0.4662	0.37	0.0166	0.18829
13	17462113		13_17462113	0.06	0.472612	0.382979	0.006	0.208418
13	17845509	17855725	Isochorismatase domain-containing protein n=1 Tax=Lottia gigantea TaxID=225164 RepID=V4AKI9_LOTGI
13	17850202		13_17850202	0	0.4838	0.41	-0.0233	0.811776
13	17850319		13_17850319	0	0.4872	0.42	-0.0215	0.758132
13	18285730	18357170	Homeodomain-interacting protein kinase 2 n=8 Tax=Pectinidae TaxID=6566 RepID=A0A210PLG6_MIZYE
13	18339966		13_18339966	0	0.4982	0.47	-0.035	1
13	18341707		13_18341707	0	0.4872	0.42	0.0282	0.134262
13	22790702	22805612	Carboxylic ester hydrolase n=3 Tax=Mizuhopecten yessoensis TaxID=6573 RepID=A0A210PXZ1_MIZYE
13	22799644		13_22799644	0	0.4928	0.44	0.0278	0.14094
13	22800487		13_22800487	0	0.3078	0.19	0.0023	0.37835
13	22826101	22862511	LOW QUALITY PROTEIN: kelch-like protein 24 n=1 Tax=Crassostrea virginica TaxID=6565 RepID=UPI000BAEA0F6
13	22829946		13_22829946	0	0.48	0.4	-0.0165	0.782268
13	22830017		13_22830017	0	0.4608	0.36	-0.0185	0.831324
13	24522697	24638490	3-ketoacyl-CoA thiolase, mitochondrial n=3 Tax=Crassostrea TaxID=6564 RepID=K1PF60_CRAGI
13	24547378		13_24547378	0	0.4352	0.32	0.1331	0.006052
13	24588982		13_24588982	0.06	0.34699	0.223404	-0.0244	0.489098
13	26439897	26442225	Solute carrier family 46 member 3 n=1 Tax=Mizuhopecten yessoensis TaxID=6573 RepID=A0A210QE36_MIZYE
13	26440385		13_26440385	0.04	0.489366	0.427083	-0.0011	0.436974
13	26440718		13_26440718	0.06	0.455636	0.351064	-0.0308	0.531334
13	26957464	26976835	26S proteasome non-ATPase regulatory subunit 2 n=3 Tax=Crassostrea TaxID=6564 RepID=K1PEY4_CRAGI
13	26965343		13_26965343	0	0.495	0.45	-0.0083	0.417954
13	26966729		13_26966729	0	0.4998	0.49	-0.001	0.353956
13	26980010	26988034	Actin, cytoplasmic n=30 Tax=Protostomia TaxID=33317 RepID=A0A345S6Z0_CEPNE
13	26984663		13_26984663	0	0.4662	0.37	-0.0085	0.471132
13	26986931		13_26986931	0	0.4982	0.47	-0.0256	0.523494
13	27412104	27427948	1-deoxyxylulose-5-phosphate synthase YajO n=3 Tax=Crassostrea TaxID=6564 RepID=UPI00148A9701
13	27417445		13_27417445	0	0.4838	0.41	-0.0076	0.516408
13	27417487		13_27417487	0	0.48	0.4	0.0045	0.361378
13	28179734	28191516	Bcl-2-associated X n=1 Tax=Tegillarca granosa TaxID=220873 RepID=A0A346FR87_TEGGR
13	28189286		13_28189286	0	0.48	0.4	-0.0128	0.658308
13	28189333		13_28189333	0	0.4902	0.43	0.0057	0.368382
13	29693801	29721145	beta-lactamase domain-containing protein 2-like n=1 Tax=Pecten maximus TaxID=6579 RepID=UPI001458469F
13	29705016		13_29705016	0	0.3318	0.21	-0.0144	0.517834
13	29718568		13_29718568	0	0.4998	0.49	0.0487	0.079814
13	30802474	30870491	sodium-dependent proline transporter-like isoform X2 n=1 Tax=Pecten maximus TaxID=6579 RepID=UPI00145915E9
13	30805528		13_30805528	0	0.4992	0.48	-0.0308	0.903308
13	30806068		13_30806068	0	0.2952	0.18	-0.0299	0.713262
13	32195150	32201263	adenosine monophosphate-protein transferase FICD-like n=1 Tax=Crassostrea virginica TaxID=6565 RepID=UPI000BAF300C
13	32195640		13_32195640	0	0.4992	0.48	0.0022	0.847156
13	32195646		13_32195646	0	0.4662	0.37	-0.032	0.748876
13	33355835	33371932	Nuclear hormone receptor HR3 n=1 Tax=Mizuhopecten yessoensis TaxID=6573 RepID=A0A210R4M2_MIZYE
13	33364225		13_33364225	0	0.4992	0.48	0.0316	0.127026
13	33365689		13_33365689	0	0.375	0.25	-0.0172	0.612896
14	1386601	1402349	G-protein coupled receptor 157 isoform X1 n=2 Tax=Crassostrea gigas TaxID=29159 RepID=UPI00148AB3A1
14	1388972		14_1388972	0	0.4838	0.41	-0.016	0.34554
14	1389560		14_1389560	0	0.4968	0.46	-0.0242	0.540714
14	1520448	1543153	G-protein coupled receptor 157-like n=1 Tax=Crassostrea virginica TaxID=6565 RepID=UPI000BAF39B6
14	1524623		14_1524623	0.02	0.499792	0.489796	0.0161	0.210834
14	1533477		14_1533477	0	0.4992	0.48	0.0384	0.078106
14	1918602	1926267	histidine N-acetyltransferase-like n=2 Tax=Pomacea canaliculata TaxID=400727 RepID=UPI000D737353
14	1919752		14_1919752	0.22	0.478961	0.397436	-0.0169	0.489954
14	1919894		14_1919894	0.18	0.403629	0.280488	-0.0352	0.73261
14	3562435	3567636	Protein CLN8 n=4 Tax=Crassostrea TaxID=6564 RepID=K1PTP9_CRAGI
14	3563187		14_3563187	0	0.4902	0.43	0.0089	0.240136
14	3564614		14_3564614	0	0.4712	0.38	-0.0235	0.779556
14	3871872	3898159	Putative ribosomal RNA methyltransferase NOP2 n=10 Tax=Crassostrea gigas TaxID=29159 RepID=K1PLG1_CRAGI
14	3878169		14_3878169	0	0.3318	0.21	0.0265	0.10971
14	3878311		14_3878311	0	0.375	0.25	-0.0257	0.730978
14	4786594	4881692	Cyclic GMP-AMP synthase n=1 Tax=Mizuhopecten yessoensis TaxID=6573 RepID=A0A210QHE3_MIZYE
14	4788288		14_4788288	0.02	0.5	0.5	-0.0093	0.643424
14	4788314		14_4788314	0.02	0.486672	0.418367	0.0085	0.413552
14	5870253	5885795	mitochondrial 2-oxoglutarate/malate carrier protein-like n=1 Tax=Aplysia californica TaxID=6500 RepID=UPI000359B42C
14	5884689		14_5884689	0	0.4032	0.28	-0.01	0.275964
14	5884946		14_5884946	0	0.3318	0.21	-0.0013	0.334886
14	7266181	7315411	Chloride channel protein 2 n=9 Tax=Pectinidae TaxID=6566 RepID=A0A210QTK0_MIZYE
14	7311284		14_7311284	0.04	0.457465	0.354167	0.0144	0.20226
14	7313737		14_7313737	0.06	0.390448	0.265957	-0.0058	0.374654
14	7809168	7838129	Trifunctional purine biosynthetic protein adenosine-3 n=2 Tax=Pomacea canaliculata TaxID=400727 RepID=A0A2T7PQ70_POMCA
14	7810450		14_7810450	0	0.495	0.45	-0.0013	0.439812
14	7813595		14_7813595	0	0.4982	0.47	0.0233	0.161384
14	9570749	9583440	phosphatidylinositol N-acetylglucosaminyltransferase subunit P-like n=1 Tax=Saccoglossus kowalevskii TaxID=10224 RepID=UPI0003F08C2E
14	9577319		14_9577319	0.12	0.433884	0.318182	-0.0044	0.252008
14	9577338		14_9577338	0.14	0.42185	0.302326	0.0123	0.18534
14	13037814	13066059	E3 ubiquitin-protein ligase TRIM71 isoform X1 n=1 Tax=Crassostrea gigas TaxID=29159 RepID=UPI00148A3934
14	13038206		14_13038206	0	0.3078	0.19	0.0416	0.088598
14	13053021		14_13053021	0.1	0.24716	0.144444	0.0348	0.083952
14	13066116	13084839	Peptidylglycine monooxygenase n=1 Tax=Agrilus planipennis TaxID=224129 RepID=A0A1W4X0R0_AGRPL
14	13083437		14_13083437	0.22	0.326101	0.205128	0.0852	0.022306
14	13083447		14_13083447	0.22	0.294543	0.179487	-0.0301	0.337124
14	13450795	13519030	leucine-rich repeat-containing protein 15-like n=1 Tax=Pecten maximus TaxID=6579 RepID=UPI0014584C44
14	13452529		14_13452529	0	0.4968	0.46	0.0034	0.325322
14	13458174		14_13458174	0	0.4928	0.44	-0.0133	0.559566
14	16069310	16122686	chromodomain-helicase-DNA-binding protein 5-like isoform X1 n=3 Tax=Pecten maximus TaxID=6579 RepID=UPI0014580177
14	16077536		14_16077536	0	0.4968	0.46	-0.0149	0.489632
14	16089054		14_16089054	0	0.4278	0.31	-0.0253	0.961648
14	16125857	16157906	placenta-specific gene 8 protein n=1 Tax=Crassostrea gigas TaxID=29159 RepID=UPI00148A29C4
14	16138149		14_16138149	0	0.495	0.45	-0.032	0.872142
14	16145433		14_16145433	0	0.4968	0.46	0.0155	0.20367
14	17631357	17643499	Peptidylglycine monooxygenase n=1 Tax=Lingula unguis TaxID=7574 RepID=A0A1S3H7I0_LINUN
14	17636263		14_17636263	0.04	0.117188	0.0625	0.1896	0.000482
14	17636580		14_17636580	0	0.4032	0.28	0.0859	0.007614
14	17891296	17906948	Spermidine synthase n=2 Tax=Pectinidae TaxID=6566 RepID=A0A210Q7V0_MIZYE
14	17894268		14_17894268	0	0.3542	0.23	-0.0236	0.443036
14	17904764		14_17904764	0	0.4712	0.38	-0.0004	0.28752
14	18151440	18154665	endoglucanase n=2 Tax=Crassostrea gigas TaxID=29159 RepID=UPI00148A5ECF
14	18151587		14_18151587	0.24	0.208795	0.118421	-0.0559	0.642494
14	18847160	18887426	probable cation-transporting ATPase 13A3 isoform X1 n=3 Tax=Crassostrea virginica TaxID=6565 RepID=UPI000BB04F31
14	18849988		14_18849988	0.02	0.286756	0.173469	0.0011	0.452712
14	18853580		14_18853580	0.08	0.15879	0.0869565	0.0168	0.285476
14	19551292	19572072	Tripartite motif-containing protein 56 n=2 Tax=Crassostrea gigas TaxID=29159 RepID=K1QSF4_CRAGI
14	19551687		14_19551687	0.26	0.149014	0.0810811	0.0788	0.017182
14	19732939	19756198	ATP-binding cassette sub-family F member 3 n=3 Tax=Pectinidae TaxID=6566 RepID=A0A210QDB1_MIZYE
14	19743425		14_19743425	0	0.4968	0.46	-0.0034	0.363724
14	19751314		14_19751314	0	0.4838	0.41	0.0055	0.345906
14	20651659	20667311	Endoglucanase n=1 Tax=Corbicula japonica TaxID=141464 RepID=A0ZT16_9BIVA
14	20662535		14_20662535	0.02	0.494794	0.44898	0.0074	0.248808
14	20667226		14_20667226	0.02	0.474802	0.387755	-0.0448	0.80928
14	22243847	22292423	E3 ubiquitin-protein ligase MIB2 isoform X1 n=3 Tax=Crassostrea gigas TaxID=29159 RepID=UPI00148A69AF
14	22245514		14_22245514	0	0.4968	0.46	-0.019	0.602356
14	22291136		14_22291136	0	0.4928	0.44	-0.0369	0.934146
14	22937118	22952716	Dopamine beta-hydroxylase n=4 Tax=Mizuhopecten yessoensis TaxID=6573 RepID=A0A210R5P4_MIZYE
14	22947492		14_22947492	0	0.455	0.35	-0.0185	0.638362
14	22949630		14_22949630	0	0.4968	0.46	-0.0338	0.847556
14	24669737	24687918	Ubiquitin-like domain-containing protein n=1 Tax=Rhizophagus irregularis TaxID=588596 RepID=A0A2I1EQE2_9GLOM
14	28020518	28169492	Tripartite motif-containing protein 56 n=2 Tax=Crassostrea gigas TaxID=29159 RepID=K1QSF4_CRAGI
14	28128531		14_28128531	0	0.455	0.35	-0.0099	0.639634
14	28163482		14_28163482	0	0.4422	0.33	0.0254	0.172254
14	29197179	29207391	acetyl-coenzyme A transporter 1-like n=1 Tax=Crassostrea virginica TaxID=6565 RepID=UPI000BAF7012
14	29199151		14_29199151	0	0.4872	0.42	0.0248	0.145936
14	29199322		14_29199322	0	0.4712	0.38	-0.0348	0.93149
14	29799780	29813860	AAA domain-containing protein n=1 Tax=Capitella teleta TaxID=283909 RepID=R7TPJ4_CAPTE
14	29802394		14_29802394	0	0.4992	0.48	-0.0173	0.494188
14	29802406		14_29802406	0	0.495	0.45	-0.0305	0.815154
14	30280690	30303230	Solute carrier family 35 member E2 n=2 Tax=Pectinidae TaxID=6566 RepID=A0A210R2S7_MIZYE
14	30289602		14_30289602	0.02	0.424823	0.306122	-0.0115	0.20883
14	30289623		14_30289623	0.02	0.359225	0.234694	-0.0554	0.95296
14	30549750	30564514	cytochrome P450 4F6-like n=2 Tax=Pecten maximus TaxID=6579 RepID=UPI0014586372
14	30559593		14_30559593	0	0.4278	0.31	0.0158	0.240904
14	30559599		14_30559599	0	0.4278	0.31	-0.0072	0.436348
14	30863591	30873503	solute carrier family 25 member 35-like n=1 Tax=Mizuhopecten yessoensis TaxID=6573 RepID=UPI000B45BB8F
14	30867102		14_30867102	0.18	0.441701	0.329268	0.0006	0.281934
14	30867126		14_30867126	0.22	0.498685	0.474359	0.0195	0.16307
14	32119129	32142521	E3 ubiquitin-protein ligase MIB2-like n=1 Tax=Pecten maximus TaxID=6579 RepID=UPI001459054D
14	32119468		14_32119468	0	0.5	0.5	0.0109	0.266662
14	32120463		14_32120463	0	0.4422	0.33	0.0716	0.019496
14	33307167	33375693	sodium- and chloride-dependent glycine transporter 1-like n=2 Tax=Pectinidae TaxID=6566 RepID=UPI001457F8AF
14	33337702		14_33337702	0	0.4928	0.44	0.0528	0.055626
14	33337974		14_33337974	0	0.4902	0.43	0.0529	0.055522
15	2102093	2171864	epidermal growth factor-like protein 8-like n=1 Tax=Saccoglossus kowalevskii TaxID=10224 RepID=UPI0003F0E38D
15	2120154		15_2120154	0	0.5	0.5	-0.0063	0.492066
15	2147460		15_2147460	0	0.4982	0.47	-0.0206	0.73615
15	4488353	4496653	TPR and ankyrin repeat-containing protein 1-like n=2 Tax=Mizuhopecten yessoensis TaxID=6573 RepID=UPI000B45D516
15	4518555	4522445	TPR and ankyrin repeat-containing protein 1-like n=1 Tax=Pecten maximus TaxID=6579 RepID=UPI0014588B4F
15	6988136	7059250	clavaminate synthase-like protein At3g21360 n=2 Tax=Crassostrea virginica TaxID=6565 RepID=UPI000BAF7526
15	7033760		15_7033760	0	0.495	0.45	-0.0259	0.78965
15	7035214		15_7035214	0	0.495	0.45	0.084	0.021542
15	8306284	8316500	inositol phosphoceramide mannosyltransferase 2-like n=1 Tax=Aplysia californica TaxID=6500 RepID=UPI00035A29A4
15	8313949		15_8313949	0	0.1958	0.11	-0.0348	1
15	8315249		15_8315249	0	0.1958	0.11	0.0283	0.159388
15	8413148	8448533	A disintegrin and metalloproteinase with thrombospondin motifs 16 n=14 Tax=Mizuhopecten yessoensis TaxID=6573 RepID=A0A210QCU4_MIZYE
15	8418514		15_8418514	0.12	0.474174	0.386364	-0.0419	0.812454
15	8436903		15_8436903	0.12	0.497676	0.465909	-0.028	0.513674
15	8871219	8876790	Microsomal glutathione S-transferase n=1 Tax=Ruditapes philippinarum TaxID=129788 RepID=C8CBM6_RUDPH
15	8875852		15_8875852	0	0.4982	0.47	-0.0192	1
15	8876009		15_8876009	0	0.3542	0.23	0.0406	0.077004
15	9242165	9246788	Sulfotransferase-like protein (Fragment) n=1 Tax=Meretrix meretrix TaxID=291251 RepID=E0AF00_MERMT
15	9242621		15_9242621	0.02	0.359225	0.234694	0.0368	0.097418
15	9244487		15_9244487	0	0.4992	0.48	-0.0319	0.765822
15	10376131	10417612	E3 ubiquitin-protein ligase LRSAM1-like n=1 Tax=Pecten maximus TaxID=6579 RepID=UPI00145904E3
15	10390778		15_10390778	0	0.4422	0.33	0.0155	0.221096
15	10396097		15_10396097	0	0.3848	0.26	-0.0081	0.524384
15	11370070	11486805	Deleted in malignant brain tumors 1 protein n=1 Tax=Mizuhopecten yessoensis TaxID=6573 RepID=A0A210R0V5_MIZYE
15	11391044		15_11391044	0	0.3078	0.19	-0.0286	0.80228
15	11392952		15_11392952	0	0.495	0.45	-0.0144	0.542412
15	12121127	12134446	Sushi, nidogen and EGF-like domain-containing protein 1 n=1 Tax=Mizuhopecten yessoensis TaxID=6573 RepID=A0A210QRT4_MIZYE
15	12127772		15_12127772	0.08	0.465974	0.369565	-0.0187	0.447028
15	12129897		15_12129897	0.12	0.497676	0.465909	-0.0381	0.797402
15	12144584	12183836	sushi, von Willebrand factor type A, EGF and pentraxin domain-containing protein 1-like n=1 Tax=Crassostrea virginica TaxID=6565 RepID=UPI000BAF0A55
15	12241422	12271106	sushi, von Willebrand factor type A, EGF and pentraxin domain-containing protein 1-like n=1 Tax=Crassostrea virginica TaxID=6565 RepID=UPI000BAF0A55
15	12243328		15_12243328	0.1	0.451605	0.344444	-0.0416	0.754446
15	12254149		15_12254149	0.08	0.484877	0.413043	0.0645	0.050112
15	12275559	12283908	Sushi, nidogen and EGF-like domain-containing protein 1 n=1 Tax=Mizuhopecten yessoensis TaxID=6573 RepID=A0A210QRT4_MIZYE
15	12506161	12513876	LOW QUALITY PROTEIN: protein catecholamines up-like n=1 Tax=Pecten maximus TaxID=6579 RepID=UPI001458F16C
15	12506885		15_12506885	0	0.455	0.35	0.0311	0.113222
15	12508084		15_12508084	0	0.4838	0.41	0.0285	0.179588
15	12529978	12558122	calmodulin-like protein 5 isoform X1 n=3 Tax=Crassostrea virginica TaxID=6565 RepID=UPI000BAEF274
15	12535917		15_12535917	0	0.4998	0.49	-0.0142	0.714272
15	12557034		15_12557034	0	0.4712	0.38	-0.0109	0.533156
15	13295300	13329047	extensin-like n=1 Tax=Ixodes scapularis TaxID=6945 RepID=UPI001161B615
15	13297131		15_13297131	0	0.3318	0.21	-0.0183	0.517992
15	13321951		15_13321951	0.08	0.499055	0.478261	0.0546	0.03338
15	17539527	17560690	Perlucin-like protein n=1 Tax=Mizuhopecten yessoensis TaxID=6573 RepID=A0A210R4X0_MIZYE
15	17559541		15_17559541	0	0.4968	0.46	0.0131	0.216924
15	17559571		15_17559571	0	0.3942	0.27	-0.0195	0.45881
15	19034058	19044430	Dolichyl pyrophosphate phosphatase 1 n=1 Tax=Lottia gigantea TaxID=225164 RepID=V4B6T9_LOTGI
15	19036725		15_19036725	0	0.4118	0.29	-0.0278	1
15	21173036	21209399	methyltransferase-like protein 24 isoform X4 n=2 Tax=Crassostrea TaxID=6564 RepID=UPI00148A82C8
15	21201981		15_21201981	0	0.4982	0.47	-0.0132	0.645872
15	21205455		15_21205455	0	0.4992	0.48	-0.0308	0.903026
15	21209670	21228518	Exoglucanase XynX n=1 Tax=Mizuhopecten yessoensis TaxID=6573 RepID=A0A210Q0L9_MIZYE
15	21222982		15_21222982	0.02	0.499167	0.479592	0.0351	0.099242
15	21226063		15_21226063	0.02	0.324865	0.204082	-0.019	0.48689
15	22569027	22636756	ABCB/P-glycoprotein-like protein n=6 Tax=Pteriomorphia TaxID=6545 RepID=G4RJB1_MYTGA
15	22569748		15_22569748	0	0.4928	0.44	-0.0264	0.68614
15	22591057		15_22591057	0	0.4902	0.43	0.0463	0.069234
15	23186871	23239424	Calcium-binding mitochondrial carrier protein SCaMC-2 n=2 Tax=Pectinidae TaxID=6566 RepID=A0A210PXD1_MIZYE
15	23187833		15_23187833	0	0.4662	0.37	0.004	0.500878
15	23188918		15_23188918	0	0.3848	0.26	-0.0127	0.43406
15	24267187	24273796	C-type lectin n=1 Tax=Meretrix meretrix TaxID=291251 RepID=A0A173DQG5_MERMT
15	24273466		15_24273466	0	0.4928	0.44	-0.0149	0.354658
15	24273536		15_24273536	0	0.495	0.45	-0.0089	0.29385
15	24494400	24503555	Centriolin n=27 Tax=Pectinidae TaxID=6566 RepID=A0A210PLV1_MIZYE
15	24501279		15_24501279	0	0.4992	0.48	0.0047	0.304948
15	24501737		15_24501737	0	0.455	0.35	0.1777	0.001216
15	24960632	25006902	probable phytanoyl-CoA dioxygenase n=1 Tax=Aplysia californica TaxID=6500 RepID=UPI00035A188C
15	24995711		15_24995711	0.14	0.391833	0.267442	0.0055	0.21185
15	25001887		15_25001887	0.02	0.464806	0.367347	-0.0064	0.33894
15	25176627	25196311	mucin-2-like n=1 Tax=Pecten maximus TaxID=6579 RepID=UPI0014590320
15	25184737		15_25184737	0	0.4838	0.41	-0.0183	0.73258
15	25187691		15_25187691	0.22	0.426036	0.307692	-0.0315	0.854188
15	26240467	26274421	protein spinster homolog 1-like isoform X1 n=3 Tax=Crassostrea virginica TaxID=6565 RepID=UPI000BB0747E
15	26240702		15_26240702	0	0.4968	0.46	0.0181	0.200898
15	26241654		15_26241654	0	0.4982	0.47	-0.0323	0.844468
15	29483940	29533559	probable serine-O-acetyltransferase isoform X1 n=2 Tax=Crassostrea virginica TaxID=6565 RepID=UPI000BB043BE
15	29486175		15_29486175	0	0.4872	0.42	0.003	0.1796
15	29488092		15_29488092	0	0.3432	0.22	0.0183	0.144444
15	29540456	29585937	Carnitine O-acetyltransferase n=3 Tax=Pectinidae TaxID=6566 RepID=A0A210R0U7_MIZYE
15	29548694		15_29548694	0	0.4488	0.34	0	0.391652
15	29554474		15_29554474	0	0.4872	0.42	-0.0092	0.340692
15	30505226	30618393	Golgin subfamily A member 2 n=2 Tax=Mizuhopecten yessoensis TaxID=6573 RepID=A0A210QP81_MIZYE
15	30556481		15_30556481	0	0.3318	0.21	-0.0299	0.858354
15	30613820		15_30613820	0	0.2262	0.13	0.1473	0.001088
15	30716591	30829214	FK506-binding protein 15-like isoform X1 n=2 Tax=Crassostrea virginica TaxID=6565 RepID=UPI000BAFD22B
15	30718110		15_30718110	0	0.4968	0.46	-0.0144	0.735354
15	30746603		15_30746603	0	0.4992	0.48	-0.028	0.87251
16	2770239	2777276	fucolectin-like n=7 Tax=Crassostrea gigas TaxID=29159 RepID=UPI00148A4130
16	2770660		16_2770660	0	0.4662	0.37	-0.0209	0.667404
16	2776689		16_2776689	0	0.4902	0.43	-0.0101	0.454774
16	3927903	3937397	Tumor necrosis factor ligand superfamily member 10 n=3 Tax=Crassostrea gigas TaxID=29159 RepID=K1R207_CRAGI
16	3928743		16_3928743	0	0.4992	0.48	0.1146	0.007138
16	3929260		16_3929260	0	0.48	0.4	-0.0269	0.932648
16	7687712	7699575	heat shock 70 kDa protein 12B-like n=2 Tax=Crassostrea virginica TaxID=6565 RepID=UPI000BB08E8D
16	7689363		16_7689363	0	0.4662	0.37	-0.0107	0.484516
16	7689438		16_7689438	0	0.4608	0.36	-0.0251	0.644768
16	8146061	8157264	G2/mitotic-specific cyclin-B3-like n=1 Tax=Crassostrea virginica TaxID=6565 RepID=UPI000BAFCEB3
16	8148153		16_8148153	0	0.4712	0.38	-0.0108	0.437988
16	8150045		16_8150045	0	0.495	0.45	0	0.398814
16	9492983	9503562	dnaJ homolog subfamily C member 3-like n=1 Tax=Pecten maximus TaxID=6579 RepID=UPI0014585628
16	9500706		16_9500706	0	0.495	0.45	-0.0018	0.483244
16	9501590		16_9501590	0	0.4872	0.42	-0.0046	0.537758
16	10334527	10347702	arginine and glutamate-rich protein 1 n=1 Tax=Lingula unguis TaxID=7574 RepID=A0A1S3HNQ0_LINUN
16	10335336		16_10335336	0	0.4982	0.47	-0.0125	0.546514
16	10341102		16_10341102	0	0.4712	0.38	0.0421	0.093476
16	11022212	11046285	Lysosome-associated membrane glycoprotein 1 n=1 Tax=Mizuhopecten yessoensis TaxID=6573 RepID=A0A210R797_MIZYE
16	11023060		16_11023060	0	0.5	0.5	-0.0315	1
16	13335932	13341013	Ankyrin repeat domain-containing protein 50 n=1 Tax=Mizuhopecten yessoensis TaxID=6573 RepID=A0A210Q5M0_MIZYE
16	13338144		16_13338144	0	0.4838	0.41	-0.0003	0.594114
16	13338479		16_13338479	0	0.4902	0.43	-0.0019	0.81124
16	14031563	14262777	NFX1-type zinc finger-containing protein 1-like n=1 Tax=Mizuhopecten yessoensis TaxID=6573 RepID=UPI000B45F399
16	14032715		16_14032715	0	0.48	0.4	0.0423	0.054734
16	14033842		16_14033842	0	0.4712	0.38	0.0442	0.06128
16	14578440	14631064	Importin-5 n=2 Tax=Pectinidae TaxID=6566 RepID=A0A210QEH5_MIZYE
16	14579090		16_14579090	0	0.48	0.4	0.0316	0.132138
16	14629719		16_14629719	0	0.455	0.35	0.1143	0.012222
16	14794549	14814183	elongation factor G, mitochondrial-like n=1 Tax=Pomacea canaliculata TaxID=400727 RepID=UPI000D737FB7
16	14812659		16_14812659	0	0.495	0.45	-0.0176	0.762342
16	15555536	15609801	ABC transporter G family member 14-like n=1 Tax=Pecten maximus TaxID=6579 RepID=UPI0014583B16
16	15556189		16_15556189	0	0.4968	0.46	0.0222	0.131922
16	15560666		16_15560666	0	0.3542	0.23	0.0329	0.108518
16	18580167	18591463	nuclear fragile X mental retardation-interacting protein 1-like n=1 Tax=Pecten maximus TaxID=6579 RepID=UPI00145892BA
16	18581442		16_18581442	0	0.4712	0.38	-0.0224	0.648804
16	18589022		16_18589022	0	0.4982	0.47	0.0111	0.265386
16	18850169	18866010	mannose-P-dolichol utilization defect 1 protein homolog n=1 Tax=Mizuhopecten yessoensis TaxID=6573 RepID=UPI000B45F41B
16	18853837		16_18853837	0	0.4872	0.42	0.0075	0.257876
16	18855726		16_18855726	0	0.4982	0.47	-0.0029	0.415204
16	18882296	18892874	Dehydrogenase/reductase SDR family member 12 n=2 Tax=Crassostrea gigas TaxID=29159 RepID=K1R3A5_CRAGI
16	18888088		16_18888088	0	0.4608	0.36	-0.0272	0.747438
16	18891158		16_18891158	0	0.4902	0.43	-0.0257	0.641458
16	19266403	19272011	transforming growth factor-beta-induced protein ig-h3-like n=1 Tax=Pecten maximus TaxID=6579 RepID=UPI001458CB45
16	19267508		16_19267508	0.04	0.444444	0.333333	0.002	0.222302
16	19267580		16_19267580	0.04	0.451172	0.34375	-0.0428	0.924264
16	19396696	19424739	Lipoate-protein ligase B n=3 Tax=Octopus TaxID=6643 RepID=A0A0L8FR25_OCTBM
16	19398469		16_19398469	0	0.4982	0.47	-0.0377	1
16	19399590		16_19399590	0	0.4998	0.49	0.0041	0.315226
16	19650002	19659053	Contactin-associated protein like 5-3 n=1 Tax=Mizuhopecten yessoensis TaxID=6573 RepID=A0A210QFB9_MIZYE
16	19652709		16_19652709	0	0.4712	0.38	0.0271	0.119012
16	19653261		16_19653261	0.02	0.432528	0.316327	0.0484	0.04538
16	19730806	19745157	thymidylate kinase-like n=1 Tax=Pecten maximus TaxID=6579 RepID=UPI001458ACCE
16	19731516		16_19731516	0	0.48	0.4	0.0052	0.27817
16	19735623		16_19735623	0	0.2408	0.14	0.101	0.004042
16	21212151	21251867	UDP-glucose:glycoprotein glucosyltransferase 1-like n=1 Tax=Pecten maximus TaxID=6579 RepID=UPI0014590251
16	21212972		16_21212972	0	0.4662	0.37	0.0134	0.206428
16	21214665		16_21214665	0	0.4968	0.46	0.0036	0.37701
16	21254323	21357703	NFX1-type zinc finger-containing protein 1-like n=1 Tax=Mizuhopecten yessoensis TaxID=6573 RepID=UPI000B45F399
16	21338192		16_21338192	0	0.4662	0.37	0.0539	0.059754
16	21338991		16_21338991	0	0.4872	0.42	0.0076	0.272508
16	21565887	21575603	monocarboxylate transporter 12-B-like n=1 Tax=Pecten maximus TaxID=6579 RepID=UPI0014589102
16	21569235		16_21569235	0.02	0.286756	0.173469	-0.0198	0.701486
16	21572230		16_21572230	0.04	0.451172	0.34375	0.0533	0.062126
16	22176620	22183302	Methyltransf_21 domain-containing protein n=2 Tax=Crassostrea gigas TaxID=29159 RepID=K1RTT4_CRAGI
16	22361830	22388249	WD_REPEATS_REGION domain-containing protein n=1 Tax=Lottia gigantea TaxID=225164 RepID=V4ACS8_LOTGI
16	22367406		16_22367406	0	0.4928	0.44	-0.0176	0.57887
16	22376652		16_22376652	0	0.4968	0.46	-0.0177	0.689728
16	22504028	22521675	Monocarboxylate transporter 5 n=1 Tax=Mizuhopecten yessoensis TaxID=6573 RepID=A0A210QXZ3_MIZYE
16	22519468		16_22519468	0	0.3078	0.19	-0.0271	0.84989
16	22520982		16_22520982	0	0.1958	0.11	-0.0367	0.918954
16	24226045	24255295	alpha-mannosidase 2x-like n=1 Tax=Pecten maximus TaxID=6579 RepID=UPI0014590B6C
16	24228458		16_24228458	0	0.4032	0.28	0.0507	0.096686
16	24228647		16_24228647	0	0.4968	0.46	0.0222	0.227286
16	25904958	25923020	metalloreductase STEAP4-like isoform X1 n=4 Tax=Pecten maximus TaxID=6579 RepID=UPI0014588784
16	25918735		16_25918735	0	0.4928	0.44	0.0826	0.017958
16	25920427		16_25920427	0	0.4992	0.48	0.0307	0.099258
16	28114868	28137896	MACPF domain-containing protein (Fragment) n=1 Tax=Lottia gigantea TaxID=225164 RepID=V4AH91_LOTGI
16	28120776		16_28120776	0	0.4872	0.42	0.0221	0.177742
16	28131882		16_28131882	0.08	0.465974	0.369565	-0.0213	0.645836
16	30273337	30296524	Cartilage intermediate layer protein 2 n=2 Tax=Mizuhopecten yessoensis TaxID=6573 RepID=A0A210QK88_MIZYE
16	30273624		16_30273624	0	0.495	0.45	0.0036	0.162826
16	30291699		16_30291699	0	0.4928	0.44	-0.0477	0.841764
17	99552	106560	Nephrin n=2 Tax=Mizuhopecten yessoensis TaxID=6573 RepID=A0A210QHW2_MIZYE
17	101169		17_101169	0.28	0.401235	0.277778	-0.0295	0.374876
17	102644		17_102644	0.18	0.485425	0.414634	-0.0114	0.523128
17	695669	698285	hemicentin-2-like n=1 Tax=Mizuhopecten yessoensis TaxID=6573 RepID=UPI000B458F54
17	698166		17_698166	0.06	0.155727	0.0851064	0.0516	0.037898
17	847275	888222	titin-like isoform X1 n=4 Tax=Crassostrea gigas TaxID=29159 RepID=UPI00148A8397
17	876675		17_876675	0.28	0.388503	0.263889	-0.0319	0.497228
17	883170		17_883170	0.3	0.42	0.3	0.0279	0.133974
17	1892412	1913994	Threonine synthase-like 1 n=2 Tax=Mizuhopecten yessoensis TaxID=6573 RepID=A0A210PDU5_MIZYE
17	1894613		17_1894613	0	0.48	0.4	-0.01	0.531248
17	1903600		17_1903600	0	0.4928	0.44	-0.0163	0.596464
17	2699328	2801571	LOW QUALITY PROTEIN: uncharacterized protein LOC111105512 n=3 Tax=Crassostrea virginica TaxID=6565 RepID=UPI000BAF4856
17	2793595		17_2793595	0	0.4662	0.37	-0.0071	0.417768
17	2795529		17_2795529	0	0.455	0.35	0.0617	0.033394
17	3757105	3770313	Glutamine synthetase-like n=2 Tax=Crassostrea virginica TaxID=6565 RepID=UPI000BAFCD82
17	4363963	4370219	AAC-rich mRNA clone AAC4 protein-like n=1 Tax=Pecten maximus TaxID=6579 RepID=UPI0014582BBD
17	4364579		17_4364579	0	0.4422	0.33	-0.0331	0.963738
17	4369109		17_4369109	0	0.4928	0.44	-0.0406	1
17	4907579	4911442	Protein disulfide-isomerase A6-like n=1 Tax=Anneissia japonica TaxID=1529436 RepID=UPI0014256AFF
17	4909985		17_4909985	0	0.4838	0.41	-0.0209	0.63504
17	4910171		17_4910171	0	0.4838	0.41	-0.0236	0.635336
17	5043736	5057141	Neuromedin-U receptor 2 n=2 Tax=Mizuhopecten yessoensis TaxID=6573 RepID=A0A210QK94_MIZYE
17	5045377		17_5045377	0	0.4872	0.42	-0.018	0.536558
17	5052740		17_5052740	0	0.4968	0.46	0.0191	0.209036
17	7106645	7162775	Vitelline membrane outer layer protein 1 (Fragment) n=1 Tax=Ruditapes philippinarum TaxID=129788 RepID=A0A2P0M990_RUDPH
17	7125815		17_7125815	0	0.4902	0.43	-0.0312	0.90496
17	7129872		17_7129872	0	0.4982	0.47	-0.0264	0.815318
[truncated: 187 more rows]

## Sheet: Supplementary table 5
Table S5: List of the 123 most consistent DEGs associated SNPs in Cerastoderma edule showing genetic differentiation among sampling groups with increasing infection level after exposition to a Marteilia cochillia outbreak (Pardo et al., 2022). The table includes for each SNP: ID (Chromosome_position in bp); reference (REF) and alternative (ALT) alleles; frequency of the reference allele across po…
SNP_ID	Chr	Position	REF	ALT	f (REF)_I0	f (REF)_I1-2	f (REF)_I3-4	frq_graph	Frq differ consistent trend SNPs	He	MAF	Missing data	FST	p-value	DEGs Annotation
1_11827950	1	11827950	C	A	0.357143	0.595238	0.807692		0.450549	0.486111	0.416667	0.04	0.1275	0.003192	Lysosomal-trafficking regulator n=2 Tax=Mizuhopecten yessoensis TaxID=6573 RepID=A0A210PMB4_MIZYE
1_18985767	1	18985767	T	C	0.392857	0.722222	0.625			0.483471	0.409091	0.12	0.078	0.030748	cyclic nucleotide-binding domain-containing protein 2-like n=1 Tax=Pecten maximus TaxID=6579 RepID=UPI001458D427
1_24951424	1	24951424	C	T	0.9	0.681818	0.961538			0.2952	0.18	0	0.1274	0.00612	SpoU_methylase domain-containing protein n=1 Tax=Biomphalaria glabrata TaxID=6526 RepID=A0A2C9JQH1_BIOGL
1_25594873	1	25594873	A	C	0.366667	0.454545	0.769231		0.402564	0.4998	0.49	0	0.1214	0.005922	Kazal-like domain-containing protein n=1 Tax=Arion vulgaris TaxID=1028688 RepID=A0A0B7AQU4_9EUPU
1_31292642	1	31292642	A	G	0.566667	0.727273	0.423077			0.48	0.4	0	0.0561	0.046458	Mediator of RNA polymerase II transcription subunit 6 n=2 Tax=Pectinidae TaxID=6566 RepID=A0A210Q453_MIZYE
1_38113860	1	38113860	A	G	0.466667	0.590909	0.269231			0.4982	0.47	0	0.0662	0.035664	signal recognition particle 14 kDa protein n=2 Tax=Crassostrea TaxID=6564 RepID=UPI0005C37FAE
1_39526950	1	39526950	G	A	0.766667	1	0.923077			0.1638	0.09	0	0.1374	0.001298	2-aminoethylphosphonate--pyruvate transaminase n=1 Tax=Mizuhopecten yessoensis TaxID=6573 RepID=A0A210Q0A6_MIZYE
1_39528547	1	39528547	G	A	0.4	0.545455	0.192308			0.4838	0.41	0	0.0788	0.01381	2-aminoethylphosphonate--pyruvate transaminase n=1 Tax=Mizuhopecten yessoensis TaxID=6573 RepID=A0A210Q0A6_MIZYE
1_42132790	1	42132790	T	A	0.433333	0.545455	0.230769			0.4902	0.43	0	0.0612	0.039722	Dihydroxyacetone phosphate acyltransferase n=2 Tax=Pectinidae TaxID=6566 RepID=A0A210QCY9_MIZYE
1_43331114	1	43331114	T	A	0.333333	0.681818	0.653846			0.4902	0.43	0	0.1147	0.008894	ATP-binding cassette sub-family G member 5 n=2 Tax=Pectinidae TaxID=6566 RepID=A0A210Q7Z0_MIZYE
1_46181361	1	46181361	A	G	0.2	0.318182	0.538462		0.338462	0.4488	0.34	0	0.0804	0.026012	Epididymal secretory protein E1 16.5 kDa secretory protein n=1 Tax=Channa argus TaxID=215402 RepID=A0A6G1QFD5_9TELE
1_52212160	1	52212160	A	C	0.366667	0.659091	0.576923			0.495	0.45	0	0.066	0.04546	WD repeat-containing protein 27 n=3 Tax=Pectinidae TaxID=6566 RepID=A0A210PP53_MIZYE
1_61688773	1	61688773	T	G	0.6	0.772727	0.423077			0.4662	0.37	0	0.1051	0.013006	Putative establishment of meiotic spindle orientation (Fragment) n=2 Tax=Nyssorhynchus TaxID=44543 RepID=T1EAD2_ANOAQ
2_6383856	2	6383856	T	C	0.428571	0.777778	0.7			0.459184	0.357143	0.16	0.116	0.016744	non-specific lipid-transfer protein-like n=1 Tax=Priapulus caudatus TaxID=37621 RepID=UPI000719AD4E
2_24806853	2	24806853	A	T	0.333333	0.727273	0.538462			0.4928	0.44	0	0.137	0.00388	Serine palmitoyltransferase-1 n=2 Tax=Crassostrea TaxID=6564 RepID=S4SCW4_CRAGI
2_30202427	2	30202427	G	T	0.633333	0.75	0.384615			0.4712	0.38	0	0.1063	0.010972	Kyphoscoliosis peptidase n=15 Tax=Crassostrea TaxID=6564 RepID=K1PD13_CRAGI
2_31819132	2	31819132	C	T	0.433333	0.590909	0.846154		0.412821	0.4758	0.39	0	0.1166	0.00458	LOW QUALITY PROTEIN: uncharacterized protein LOC111119482 n=1 Tax=Crassostrea virginica TaxID=6565 RepID=UPI000BAF9E52
2_31820629	2	31820629	G	A	0.633333	0.636364	0.230769		0.402564	0.4982	0.47	0	0.157	0.001498	LOW QUALITY PROTEIN: uncharacterized protein LOC111119482 n=1 Tax=Crassostrea virginica TaxID=6565 RepID=UPI000BAF9E52
2_38523750	2	38523750	T	C	0.5	0.409091	0.730769			0.4992	0.48	0	0.0758	0.031206	Regulator of chromosome condensation n=2 Tax=Pectinidae TaxID=6566 RepID=A0A210PHE8_MIZYE
2_40039593	2	40039593	A	C	0.3	0.590909	0.590909			0.5	0.5	0.04	0.0725	0.029122	non-specific lipid-transfer protein-like n=1 Tax=Pecten maximus TaxID=6579 RepID=UPI001458E02A
2_40071070	2	40071070	T	A	0.6	0.863636	0.807692			0.3542	0.23	0	0.0798	0.037458	non-specific lipid-transfer protein-like n=1 Tax=Pecten maximus TaxID=6579 RepID=UPI001458E02A
2_44323669	2	44323669	A	G	0.333333	0.470588	0.05			0.435569	0.320513	0.22	0.1363	0.002956	Thimet oligopeptidase n=2 Tax=Mizuhopecten yessoensis TaxID=6573 RepID=A0A210PNW1_MIZYE
2_56051941	2	56051941	C	T	0.4	0.690476	0.3			0.499764	0.48913	0.08	0.1351	0.004706	pancreatic triacylglycerol lipase-like n=1 Tax=Crassostrea virginica TaxID=6565 RepID=UPI000BAFB217
3_4328109	3	4328109	T	A	0.366667	0.386364	0.846154		0.479487	0.5	0.5	0	0.2005	0.000132	Eukaryotic peptide chain release factor GTP-binding subunit ERF3B n=3 Tax=Crassostrea TaxID=6564 RepID=K1RCY7_CRAGI
3_12504155	3	12504155	A	C	0.333333	0.318182	0.692308			0.4872	0.42	0	0.1313	0.006022	lysosomal alpha-glucosidase-like n=1 Tax=Octopus vulgaris TaxID=6645 RepID=UPI00114107BB
3_13960779	3	13960779	C	T	0.233333	0.727273	0.307692			0.4982	0.47	0	0.2622	1e-05	C1q-related factor n=3 Tax=Mizuhopecten yessoensis TaxID=6573 RepID=A0A210Q8I7_MIZYE
3_26188137	3	26188137	C	T	0.4	0.590909	0.769231		0.369231	0.4872	0.42	0	0.0812	0.019122	Putative zyg-1-like serine/threonine protein kinase (Fragment) n=3 Tax=Ornithodoros TaxID=6937 RepID=A0A2R5L7Q3_9ACAR
3_26873342	3	26873342	T	G	0.766667	1	0.884615			0.18	0.1	0	0.1377	0.001202	FA_desaturase domain-containing protein n=1 Tax=Pomacea canaliculata TaxID=400727 RepID=A0A2T7PYW6_POMCA
3_28409793	3	28409793	A	G	0.8	0.5	0.730769			0.455	0.35	0	0.0876	0.016572	probable E3 ubiquitin-protein ligase HERC4 n=1 Tax=Crassostrea virginica TaxID=6565 RepID=UPI000BAEB843
3_28415984	3	28415984	T	C	0.766667	0.75	0.384615		0.382051	0.4488	0.34	0	0.1264	0.004296	probable E3 ubiquitin-protein ligase HERC4 n=1 Tax=Crassostrea virginica TaxID=6565 RepID=UPI000BAEB843
3_33568023	3	33568023	G	A	0.5	0.181818	0.230769			0.4118	0.29	0	0.0886	0.0137	RNA helicase n=2 Tax=Takifugu TaxID=31032 RepID=A0A5C6NSB5_9TELE
3_37423401	3	37423401	T	C	0.8	0.545455	0.461538		0.338462	0.48	0.4	0	0.0862	0.017412	Serine protease n=1 Tax=Hyriopsis cumingii TaxID=165450 RepID=D2KKK2_HYRCU
3_43413466	3	43413466	A	G	0.933333	0.636364	0.538462		0.394872	0.42	0.3	0	0.1381	0.001234	AN1-type zinc finger protein 4 n=2 Tax=Pectinidae TaxID=6566 RepID=A0A210PN22_MIZYE
4_2251384	4	2251384	T	G	0.366667	0.568182	0.692308		0.325641	0.4968	0.46	0	0.0585	0.048042	Thioredoxin domain-containing protein n=5 Tax=Octopodidae TaxID=6647 RepID=A0A0L8G3T7_OCTBM
4_27024967	4	27024967	A	G	0.933333	0.681818	0.846154			0.32	0.2	0	0.0886	0.02018	BTB domain-containing protein n=4 Tax=Pomacea canaliculata TaxID=400727 RepID=A0A2T7P555_POMCA
4_39095911	4	39095911	G	C	0.916667	0.722222	0.958333			0.261621	0.154762	0.16	0.0853	0.034614	cAMP and cAMP-inhibited cGMP 3,5-cyclic phosphodiesterase 10A-like n=1 Tax=Crassostrea virginica TaxID=6565 RepID=UPI000BB05760
4_45423046	4	45423046	T	C	0.4	0.704545	0.730769		0.330769	0.4712	0.38	0	0.0918	0.01419	apolipoprotein D-like n=1 Tax=Ctenocephalides felis TaxID=7515 RepID=UPI000E6E2EE8
5_1764000	5	1764000	G	A	0.4	0.75	0.461538			0.4902	0.43	0	0.1157	0.005042	protein ABHD14B n=1 Tax=Lingula unguis TaxID=7574 RepID=A0A1S3J445_LINUN
5_17191352	5	17191352	G	T	0.433333	0.75	0.615385			0.4712	0.38	0	0.0864	0.022846	eukaryotic translation initiation factor 5B n=1 Tax=Crassostrea gigas TaxID=29159 RepID=UPI00148A9FF2
5_28121331	5	28121331	A	T	0.933333	0.704545	0.807692			0.32	0.2	0	0.0474	0.049194	heat shock 70 kDa protein 12A isoform X1 n=2 Tax=Crassostrea gigas TaxID=29159 RepID=UPI00148ADAAB
5_29151780	5	29151780	T	A	0.966667	0.681818	0.769231			0.3318	0.21	0	0.0972	0.005566	Hexosyltransferase n=2 Tax=Crassostrea gigas TaxID=29159 RepID=K1QVC3_CRAGI
5_47646089	5	47646089	C	T	0.269231	0.547619	0.25			0.476371	0.391304	0.08	0.0841	0.019044	tumor suppressor candidate 3-like n=1 Tax=Aplysia californica TaxID=6500 RepID=UPI000359BEAC
5_48857211	5	48857211	T	G	0.178571	0.52381	0.4			0.475309	0.388889	0.1	0.1072	0.011006	Cytochrome P450 4F22 n=3 Tax=Crassostrea gigas TaxID=29159 RepID=K1R6W1_CRAGI
5_49260648	5	49260648	T	C	0.636364	0.619048	0.307692		0.328671	0.497778	0.466667	0.1	0.0753	0.02545	leucine-rich repeat and fibronectin type III domain-containing protein 1-like protein n=1 Tax=Mizuhopecten yessoensis TaxID=6573 RepID=UPI000B45A2B7
5_49354975	5	49354975	C	T	0.6	0.340909	0.615385			0.4998	0.49	0	0.0718	0.033614	RING finger protein 121 n=4 Tax=Pectinidae TaxID=6566 RepID=A0A210PL76_MIZYE
6_4147979	6	4147979	G	A	0.107143	0.204545	0.423077		0.315934	0.359225	0.234694	0.02	0.0731	0.025046	Chitin-binding type-2 domain-containing protein n=3 Tax=Crassostrea gigas TaxID=29159 RepID=K1RAU5_CRAGI
6_7033130	6	7033130	T	A	1	0.977273	0.769231		0.230769	0.1302	0.07	0	0.173	0.001438	Sodium/potassium-transporting ATPase subunit alpha n=2 Tax=Veneroida TaxID=6580 RepID=A0A513U822_SINCO
6_11581379	6	11581379	T	A	0.333333	0.590909	0.846154		0.512821	0.4872	0.42	0	0.1784	0.000392	26S proteasome non-ATPase regulatory subunit 9-like n=1 Tax=Pecten maximus TaxID=6579 RepID=UPI0014585E81
6_11586723	6	11586723	G	A	0.333333	0.659091	0.538462			0.4982	0.47	0	0.0608	0.022836	glucose-6-phosphate exchanger SLC37A2-like isoform X1 n=4 Tax=Pecten maximus TaxID=6579 RepID=UPI001458BB06
6_11586789	6	11586789	G	A	0.333333	0.704545	0.538462			0.495	0.45	0	0.1009	0.007318	glucose-6-phosphate exchanger SLC37A2-like isoform X1 n=4 Tax=Pecten maximus TaxID=6579 RepID=UPI001458BB06
6_15595766	6	15595766	C	A	0.8	0.952381	1			0.149938	0.0816327	0.02	0.1047	0.015204	Collagen pro alpha-chain n=1 Tax=Haliotis discus TaxID=36094 RepID=O97406_HALDI
6_16949964	6	16949964	G	A	0.566667	0.568182	0.269231			0.4998	0.49	0	0.0721	0.035256	bifunctional purine biosynthesis protein PURH-like n=4 Tax=Crassostrea TaxID=6564 RepID=UPI00148AA80E
6_27362754	6	27362754	A	G	0.366667	0.568182	0.692308		0.325641	0.4968	0.46	0	0.0534	0.04586	F-box/LRR-repeat protein 7 n=8 Tax=Pectinidae TaxID=6566 RepID=A0A210QQS3_MIZYE
6_32304661	6	32304661	C	A	0.625	0.964286	1		0,375	0.244898	0.142857	0.3	0.2789	0.000262	NPHS1 adhesion molecule, nephrin n=2 Tax=Anolis carolinensis TaxID=28377 RepID=H9GN95_ANOCA
7_395526	7	395526	C	T	0.366667	0.5	0.192308			0.4712	0.38	0	0.0553	0.033406	U-scoloptoxin(16)-Cw1a n=1 Tax=Crassostrea gigas TaxID=29159 RepID=UPI00148A3B3F
7_15145073	7	15145073	C	A	0.766667	0.619048	0.423077		0.34359	0.474802	0.387755	0.02	0.0699	0.031226	eIF2B_5 domain-containing protein n=1 Tax=Arion vulgaris TaxID=1028688 RepID=A0A0B6ZU51_9EUPU
7_18666371	7	18666371	A	G	0.321429	0.705882	0.269231			0.495868	0.454545	0.12	0.1941	0.000918	core-binding factor subunit beta-like isoform X2 n=2 Tax=Crassostrea virginica TaxID=6565 RepID=UPI000BB0C7DD
7_20566394	7	20566394	T	A	0.4	0.5	0.769231		0.369231	0.4968	0.46	0	0.088	0.015824	serine/threonine-protein kinase/endoribonuclease IRE1-like isoform X1 n=5 Tax=Varroa TaxID=62624 RepID=UPI000BE1659D
7_21539432	7	21539432	T	C	0.5	0.613636	0.269231			0.4998	0.49	0	0.0885	0.021144	GMP reductase n=2 Tax=Pectinidae TaxID=6566 RepID=A0A210QXQ0_MIZYE
7_25393006	7	25393006	C	T	0.863636	0.78125	1			0.223537	0.128205	0.22	0.054	0.024344	Transforming growth factor-beta-induced protein ig-h3 n=8 Tax=Crassostrea gigas TaxID=29159 RepID=K1R7Y0_CRAGI
7_33224765	7	33224765	A	T	0.833333	1	0.961538			0.1128	0.06	0	0.1098	0.014136	GDP-mannose 4,6 dehydratase-like isoform X1 n=2 Tax=Crassostrea virginica TaxID=6565 RepID=UPI000BAFCEF7
7_34363133	7	34363133	T	C	0.633333	0.9	0.769231			0.341797	0.21875	0.04	0.0552	0.02968	Testis, prostate and placenta-expressed protein n=2 Tax=Pectinidae TaxID=6566 RepID=A0A210QHF7_MIZYE
8_10466985	8	10466985	A	G	0.8	0.522727	0.692308			0.455	0.35	0	0.0639	0.046184	complement component 1 Q subcomponent-binding protein, mitochondrial-like n=1 Tax=Eurytemora affinis TaxID=88015 RepID=UPI000C76799E
8_16674344	8	16674344	A	G	0.366667	0.625	0.333333			0.498967	0.477273	0.12	0.0663	0.043136	fatty acid-binding protein 9-like n=2 Tax=Crassostrea virginica TaxID=6565 RepID=UPI000BB088EE
8_16674397	8	16674397	C	A	0.333333	0.55	0.222222			0.483471	0.409091	0.12	0.0729	0.0367	fatty acid-binding protein 9-like n=2 Tax=Crassostrea virginica TaxID=6565 RepID=UPI000BB088EE
8_19538893	8	19538893	A	G	0.4	0.590909	0.769231		0.369231	0.4872	0.42	0	0.0889	0.02108	Sulfotransferase family cytosolic 1B member 1 n=1 Tax=Mizuhopecten yessoensis TaxID=6573 RepID=A0A210PFB3_MIZYE
8_23609773	8	23609773	C	A	0.6	0.863636	0.807692			0.3542	0.23	0	0.0869	0.03771	P2X purinoceptor 4-like isoform X1 n=2 Tax=Crassostrea virginica TaxID=6565 RepID=UPI000BAF518F
8_31342192	8	31342192	A	C	0.821429	0.409091	0.590909			0.488909	0.425532	0.06	0.1395	0.00202	Sodium/glucose cotransporter 4 n=2 Tax=Pectinidae TaxID=6566 RepID=A0A210PIN3_MIZYE
9_2525574	9	2525574	T	A	0.366667	0.704545	0.576923			0.4902	0.43	0	0.0921	0.017396	lon protease homolog, mitochondrial-like n=1 Tax=Aplysia californica TaxID=6500 RepID=UPI00065C17B5
9_14452580	9	14452580	A	T	0.566667	0.840909	0.730769			0.3942	0.27	0	0.0503	0.037572	ubiquitin-conjugating enzyme E2 R2 n=2 Tax=Crassostrea TaxID=6564 RepID=UPI0005C359F7
9_20178363	9	20178363	A	C	0.4	0.681818	0.5			0.495	0.45	0	0.0555	0.049734	serum response factor-binding protein 1 n=1 Tax=Crassostrea gigas TaxID=29159 RepID=UPI00148A59DC
9_20178364	9	20178364	C	A	0.4	0.681818	0.5			0.495	0.45	0	0.0555	0.04811	serum response factor-binding protein 1 n=1 Tax=Crassostrea gigas TaxID=29159 RepID=UPI00148A59DC
9_21988895	9	21988895	T	C	1	0.75	0.642857		0.357143	0.316828	0.197368	0.24	0.1102	0.003016	GRAM domain-containing protein n=1 Tax=Lottia gigantea TaxID=225164 RepID=V3ZXY9_LOTGI
9_22580577	9	22580577	A	C	0.8	0.909091	1			0.18	0.1	0	0.0481	0.030026	Complement C1Q-like protein n=1 Tax=Hyriopsis cumingii TaxID=165450 RepID=A0A1L2FYM6_HYRCU
9_27421434	9	27421434	T	C	0.5	0.568182	0.807692		0.307692	0.4758	0.39	0	0.0544	0.044664	Sorbitol dehydrogenase n=2 Tax=Pectinidae TaxID=6566 RepID=A0A210PWF1_MIZYE
9_34396132	9	34396132	A	T	0.433333	0.477273	0.769231		0.335897	0.4968	0.46	0	0.0818	0.019572	nuclear receptor 2C2-associated protein isoform X2 n=1 Tax=Petromyzon marinus TaxID=7757 RepID=UPI001402B393
9_34714048	9	34714048	T	A	0.333333	0.0909091	0.346154			0.3542	0.23	0	0.0747	0.01311	cyclic AMP-responsive element-binding protein 3-like protein 3 isoform X2 n=2 Tax=Pecten maximus TaxID=6579 RepID=UPI00145860B7
10_1731406	10	1731406	C	T	0.666667	0.636364	0.307692		0.358974	0.4928	0.44	0	0.1055	0.012346	LOW QUALITY PROTEIN: heme-binding protein 2-like n=1 Tax=Pecten maximus TaxID=6579 RepID=UPI00145882A4
10_1732137	10	1732137	A	G	0.7	0.636364	0.346154		0.353846	0.4872	0.42	0	0.0941	0.02039	LOW QUALITY PROTEIN: heme-binding protein 2-like n=1 Tax=Pecten maximus TaxID=6579 RepID=UPI00145882A4
10_18962350	10	18962350	A	G	0.633333	0.409091	0.307692		0.325641	0.495	0.45	0	0.0696	0.03795	N-acyl-phosphatidylethanolamine-hydrolyzing phospholipase D-like n=2 Tax=Crassostrea virginica TaxID=6565 RepID=UPI000BAE7A78
10_19660532	10	19660532	A	T	0.8	0.522727	0.461538		0.338462	0.4838	0.41	0	0.0861	0.017384	heat shock 70 kDa protein 14 n=1 Tax=Lingula unguis TaxID=7574 RepID=A0A1S3JS87_LINUN
10_20845198	10	20845198	G	C	0.714286	0.52381	0.222222		0.492063	0.498967	0.477273	0.12	0.1358	0.004126	Mitosis inhibitor protein kinase wee1 n=2 Tax=Crassostrea gigas TaxID=29159 RepID=K1Q742_CRAGI
10_20845255	10	20845255	T	C	0.933333	0.789474	0.55		0.383333	0.338585	0.215909	0.12	0.1409	0.008892	Mitosis inhibitor protein kinase wee1 n=2 Tax=Crassostrea gigas TaxID=29159 RepID=K1Q742_CRAGI
10_23286715	10	23286715	G	A	0.7	0.386364	0.730769			0.4902	0.43	0	0.127	0.0049	Seryl-tRNA synthetase n=3 Tax=Octopus TaxID=6643 RepID=A0A0L8GTR7_OCTBM
10_28873699	10	28873699	C	A	0.5	0.611111	0.9375		0.4375	0.450612	0.342857	0.3	0.0993	0.010644	cytosolic 10-formyltetrahydrofolate dehydrogenase-like isoform X1 n=8 Tax=Crassostrea TaxID=6564 RepID=UPI00148A2E29
10_30619065	10	30619065	T	C	0.6	0.454545	0.769231			0.4872	0.42	0	0.0643	0.035372	monoacylglycerol lipase ABHD6-like n=1 Tax=Pecten maximus TaxID=6579 RepID=UPI001458626B
10_30619312	10	30619312	T	A	0.821429	0.454545	0.884615			0.439817	0.326531	0.02	0.2291	0.0001	monoacylglycerol lipase ABHD6-like n=1 Tax=Pecten maximus TaxID=6579 RepID=UPI001458626B
10_33341338	10	33341338	T	A	0.7	0.363636	0.576923			0.4992	0.48	0	0.0937	0.015626	Protein MCM10 homolog n=1 Tax=Mizuhopecten yessoensis TaxID=6573 RepID=A0A210PHX2_MIZYE
10_37612271	10	37612271	T	G	0.785714	0.444444	0.583333			0.483471	0.409091	0.12	0.0776	0.020568	proton myo-inositol cotransporter-like isoform X1 n=2 Tax=Pecten maximus TaxID=6579 RepID=UPI0014581860
10_37612300	10	37612300	T	C	0.791667	0.472222	0.5			0.489796	0.428571	0.16	0.0589	0.032484	proton myo-inositol cotransporter-like isoform X1 n=2 Tax=Pecten maximus TaxID=6579 RepID=UPI0014581860
11_13478210	11	13478210	G	C	0.766667	0.522727	0.807692			0.4422	0.33	0	0.0733	0.024216	Proteasome activator complex subunit 3 n=3 Tax=Crassostrea TaxID=6564 RepID=K1RFU6_CRAGI
11_24509787	11	24509787	C	T	0.8	0.522727	0.576923			0.4712	0.38	0	0.0664	0.03862	titin-like isoform X1 n=7 Tax=Pecten maximus TaxID=6579 RepID=UPI0014585808
12_1667637	12	1667637	G	T	0.833333	0.818182	1			0.2262	0.13	0	0.0499	0.030714	Eukaryotic peptide chain release factor subunit 1 n=10 Tax=Mollusca TaxID=6447 RepID=A0A2C9JCM3_BIOGL
12_12159778	12	12159778	A	G	0.666667	0.727273	0.923077		0.25641	0.3648	0.24	0	0.0533	0.046334	Cyanophycinase n=1 Tax=Pomacea canaliculata TaxID=400727 RepID=A0A2T7P8M4_POMCA
13_2926422	13	2926422	C	A	0.454545	0.578947	0			0.490869	0.432432	0.26	0.2269	0.000152	CDGSH iron-sulfur domain-containing protein 3, mitochondrial n=1 Tax=Mizuhopecten yessoensis TaxID=6573 RepID=A0A210QQA4_MIZYE
13_8897377	13	8897377	G	T	1	0.928571	0.772727		0.227273	0.155727	0.0851064	0.06	0.0928	0.013114	galactoside 2-alpha-L-fucosyltransferase 2-like isoform X1 n=2 Tax=Mizuhopecten yessoensis TaxID=6573 RepID=UPI000B45EFA6
13_24547378	13	24547378	C	T	0.266667	0.204545	0.576923			0.4352	0.32	0	0.1331	0.006052	3-ketoacyl-CoA thiolase, mitochondrial n=3 Tax=Crassostrea TaxID=6564 RepID=K1PF60_CRAGI
14_13083437	14	13083437	A	G	0.0833333	0.352941	0.1			0.326101	0.205128	0.22	0.0852	0.022306	Peptidylglycine monooxygenase n=1 Tax=Agrilus planipennis TaxID=224129 RepID=A0A1W4X0R0_AGRPL
14_17636263	14	17636263	G	T	0.785714	1	1			0.117188	0.0625	0.04	0.1896	0.000482	Peptidylglycine monooxygenase n=1 Tax=Lingula unguis TaxID=7574 RepID=A0A1S3H7I0_LINUN
14_17636580	14	17636580	A	T	0.566667	0.704545	0.923077		0.35641	0.4032	0.28	0	0.0859	0.007614	Peptidylglycine monooxygenase n=1 Tax=Lingula unguis TaxID=7574 RepID=A0A1S3H7I0_LINUN
14_19551687	14	19551687	A	T	0.909091	1	0.777778			0.149014	0.0810811	0.26	0.0788	0.017182	Tripartite motif-containing protein 56 n=2 Tax=Crassostrea gigas TaxID=29159 RepID=K1QSF4_CRAGI
14_32120463	14	32120463	A	C	0.6	0.590909	0.884615			0.4422	0.33	0	0.0716	0.019496	E3 ubiquitin-protein ligase MIB2-like n=1 Tax=Pecten maximus TaxID=6579 RepID=UPI001459054D
15_7035214	15	7035214	A	G	0.4	0.704545	0.461538			0.495	0.45	0	0.084	0.021542	clavaminate synthase-like protein At3g21360 n=2 Tax=Crassostrea virginica TaxID=6565 RepID=UPI000BAF7526
15_13321951	15	13321951	A	G	0.321429	0.575	0.666667		0.345238	0.499055	0.478261	0.08	0.0546	0.03338	extensin-like n=1 Tax=Ixodes scapularis TaxID=6945 RepID=UPI001161B615
15_24501737	15	24501737	A	G	0.766667	0.75	0.346154		0.420513	0.455	0.35	0	0.1777	0.001216	Centriolin n=27 Tax=Pectinidae TaxID=6566 RepID=A0A210PLV1_MIZYE
15_30613820	15	30613820	T	A	1	0.886364	0.692308		0.307692	0.2262	0.13	0	0.1473	0.001088	Golgin subfamily A member 2 n=2 Tax=Mizuhopecten yessoensis TaxID=6573 RepID=A0A210QP81_MIZYE
16_3928743	16	3928743	T	C	0.633333	0.522727	0.230769		0.402564	0.4992	0.48	0	0.1146	0.007138	Tumor necrosis factor ligand superfamily member 10 n=3 Tax=Crassostrea gigas TaxID=29159 RepID=K1R207_CRAGI
16_14629719	16	14629719	A	G	0.433333	0.772727	0.692308			0.455	0.35	0	0.1143	0.012222	Importin-5 n=2 Tax=Pectinidae TaxID=6566 RepID=A0A210QEH5_MIZYE
16_19653261	16	19653261	G	T	0.666667	0.590909	0.875			0.432528	0.316327	0.02	0.0484	0.04538	Contactin-associated protein like 5-3 n=1 Tax=Mizuhopecten yessoensis TaxID=6573 RepID=A0A210QFB9_MIZYE
16_19735623	16	19735623	A	G	1	0.840909	0.730769		0.269231	0.2408	0.14	0	0.101	0.004042	thymidylate kinase-like n=1 Tax=Pecten maximus TaxID=6579 RepID=UPI001458ACCE
16_25918735	16	25918735	T	C	0.4	0.545455	0.769231		0.369231	0.4928	0.44	0	0.0826	0.017958	metalloreductase STEAP4-like isoform X1 n=4 Tax=Pecten maximus TaxID=6579 RepID=UPI0014588784
17_698166	17	698166	T	C	1	0.904762	0.818182			0.155727	0.0851064	0.06	0.0516	0.037898	hemicentin-2-like n=1 Tax=Mizuhopecten yessoensis TaxID=6573 RepID=UPI000B458F54
17_2795529	17	2795529	G	A	0.833333	0.590909	0.538462		0.294872	0.455	0.35	0	0.0617	0.033394	LOW QUALITY PROTEIN: uncharacterized protein LOC111105512 n=3 Tax=Crassostrea virginica TaxID=6565 RepID=UPI000BAF4856
17_7757302	17	7757302	A	G	0.933333	0.613636	0.730769			0.3848	0.26	0	0.1022	0.005982	failed axon connections homolog n=1 Tax=Saccoglossus kowalevskii TaxID=10224 RepID=UPI0001CB999A
17_10686881	17	10686881	C	T	0.433333	0.431818	0.807692			0.4982	0.47	0	0.1343	0.003456	Niemann-Pick C1 protein-like n=1 Tax=Crassostrea gigas TaxID=29159 RepID=UPI0009752345
17_11850848	17	11850848	T	A	0.928571	0.861111	0.45		0.478571	0.367755	0.242857	0.3	0.2686	0.001818	DUF4149 domain-containing protein n=1 Tax=Haliotis diversicolor TaxID=36095 RepID=B3TK28_HALDV
17_19174105	17	19174105	C	A	0.7	0.75	0.423077			0.455	0.35	0	0.0889	0.020536	sterile alpha motif domain-containing protein 9-like n=1 Tax=Crassostrea gigas TaxID=29159 RepID=UPI00148AAFDE
18_15846462	18	15846462	C	T	0.3	0.5	0.15			0.458102	0.355263	0.24	0.1065	0.024588	hemicentin-1-like n=2 Tax=Crassostrea virginica TaxID=6565 RepID=UPI000BAE8741
18_16983304	18	16983304	A	G	0.566667	0.931818	0.730769			0.3542	0.23	0	0.1669	0.001144	Cysteine dioxygenase n=1 Tax=Mizuhopecten yessoensis TaxID=6573 RepID=A0A210QMP1_MIZYE
18_20944400	18	20944400	A	G	0.866667	0.659091	0.884615			0.3432	0.22	0	0.0631	0.042886	Cathepsin L n=1 Tax=Meretrix meretrix TaxID=291251 RepID=A0A173DQE9_MERMT
18_20951750	18	20951750	T	C	0.7	0.386364	0.423077			0.4998	0.49	0	0.0841	0.02106	Cathepsin L n=1 Tax=Meretrix meretrix TaxID=291251 RepID=A0A173DQE9_MERMT
19_11422456	19	11422456	G	T	0.538462	0.5	0.833333			0.486111	0.416667	0.16	0.0456	0.040312	Predicted protein (Fragment) n=1 Tax=Nematostella vectensis TaxID=45351 RepID=A7RNJ5_NEMVE
19_13393947	19	13393947	A	G	0.766667	0.447368	0.772727			0.464444	0.366667	0.1	0.118	0.00877	Nuclear receptor subfamily 4 group A member 2 (Fragment) n=1 Tax=Lottia gigantea TaxID=225164 RepID=V4B1N8_LOTGI

## Sheet: Supplementary table 6
Table S6: List of candidate SNPs from the population genomics (red: temporal (2012 vs 2018), blue: exposure (non-exposed vs exposed), pink: shared between temporal and exposure approaches) and transcriptomics (yellow in bold: those with progresive allele frequency trend) approaches; MAF (minimum allele frecuency); FST (genetic differentiation among groups, either of the infection level (transcrip…
SNP_ID	chromosome	SNP_Position	REF	ALT	FST	P-value	Missing data	MAF	Position to gene	Annotation	Go term
220432_34	1	4677978	A	G	0.0902873	0.00636893	0.324675	0.0277778	< 250kb	LOW QUALITY PROTEIN: steryl-sulfatase-like n=1 Tax=Pecten maximus TaxID=6579 RepID=UPI001458F17B
1_11827950	1	11827950	C	A	0.1275	0.003192	0.04	0.416667	INSIDE	Lysosomal-trafficking regulator n=2 Tax=Mizuhopecten yessoensis TaxID=6573 RepID=A0A210PMB4_MIZYE	GO:0007040
1_18985767	1	18985767	T	C	0.078	0.030748	0.12	0.409091	INSIDE	cyclic nucleotide-binding domain-containing protein 2-like n=1 Tax=Pecten maximus TaxID=6579 RepID=UPI001458D427
152630_16	1	21765580	A	G	0.106247	0.00277812	0.246753	0.0689655	< 250kb	Calmodulin n=1 Tax=Serendipita indica (strain DSM 11827) TaxID=1109443 RepID=G4TIQ3_SERID	GO:0005509, GO:0019722
1_24951424	1	24951424	C	T	0.1274	0.00612	0	0.18	INSIDE	SpoU_methylase domain-containing protein n=1 Tax=Biomphalaria glabrata TaxID=6526 RepID=A0A2C9JQH1_BIOGL	GO:0003723, GO:0008173, GO:0006396
1_25594873	1	25594873	A	C	0.1214	0.005922	0	0.49	INSIDE	Kazal-like domain-containing protein n=1 Tax=Arion vulgaris TaxID=1028688 RepID=A0A0B7AQU4_9EUPU
1_31292642	1	31292642	A	G	0.0561	0.046458	0	0.4	INSIDE	Mediator of RNA polymerase II transcription subunit 6 n=2 Tax=Pectinidae TaxID=6566 RepID=A0A210Q453_MIZYE	GO:0003712, GO:0006357, GO:0016592
1_38113860	1	38113860	A	G	0.0662	0.035664	0	0.47	INSIDE	signal recognition particle 14 kDa protein n=2 Tax=Crassostrea TaxID=6564 RepID=UPI0005C37FAE
1_39526950	1	39526950	G	A	0.1374	0.001298	0	0.09	INSIDE	2-aminoethylphosphonate--pyruvate transaminase n=1 Tax=Mizuhopecten yessoensis TaxID=6573 RepID=A0A210Q0A6_MIZYE
1_39528547	1	39528547	G	A	0.0788	0.01381	0	0.41	INSIDE	2-aminoethylphosphonate--pyruvate transaminase n=1 Tax=Mizuhopecten yessoensis TaxID=6573 RepID=A0A210Q0A6_MIZYE
1_42132790	1	42132790	T	A	0.0612	0.039722	0	0.43	INSIDE	Dihydroxyacetone phosphate acyltransferase n=2 Tax=Pectinidae TaxID=6566 RepID=A0A210QCY9_MIZYE	GO:0008374, GO:0044255
81194_27	1	42553301	A	T	0.0804252	0.0076404	0.025974	0.02	< 250kb	Malate dehydrogenase n=2 Tax=Oikopleura dioica TaxID=34765 RepID=E4WX88_OIKDI	GO:0030060, GO:0005975, GO:0006108, GO:0006099
1_43331114	1	43331114	T	A	0.1147	0.008894	0	0.43	INSIDE	ATP-binding cassette sub-family G member 5 n=2 Tax=Pectinidae TaxID=6566 RepID=A0A210Q7Z0_MIZYE	GO:0016887, GO:0042626, GO:0005524, GO:0016021
1_46181361	1	46181361	A	G	0.0804	0.026012	0	0.34	INSIDE	Epididymal secretory protein E1 16.5 kDa secretory protein n=1 Tax=Channa argus TaxID=215402 RepID=A0A6G1QFD5_9TELE	GO:0032367, GO:0005576
109996_19	1	50033999	T	G	0.160661	4.35107e-05	0.506494	0.075	INSIDE	leucine-rich repeat-containing protein 74B-like n=1 Tax=Pecten maximus TaxID=6579 RepID=UPI0014589A56
109595_3	1	50991963	C	A	0.0804252	0.0076404	0.038961	0.02	INSIDE	phospholipase D3-like n=1 Tax=Pecten maximus TaxID=6579 RepID=UPI001458D51A
1_52212160	1	52212160	A	C	0.066	0.04546	0	0.45	INSIDE	WD repeat-containing protein 27 n=3 Tax=Pectinidae TaxID=6566 RepID=A0A210PP53_MIZYE
1_61688773	1	61688773	T	G	0.1051	0.013006	0	0.37	INSIDE	Putative establishment of meiotic spindle orientation (Fragment) n=2 Tax=Nyssorhynchus TaxID=44543 RepID=T1EAD2_ANOAQ	GO:0005509, GO:0019722
85214_26	2	1512288	C	T	0.0841408	0.0051221	0.220779	0.016129	INSIDE	Peptidylprolyl isomerase n=2 Tax=Harpellales TaxID=61421 RepID=A0A2U1J4U8_9FUNG	GO:0003755
163778_3	2	5165780	G	T	0.0816777	0.00716434	0.025974	0.0197368	< 250kb	BSD domain-containing protein 1-like n=1 Tax=Crassostrea virginica TaxID=6565 RepID=UPI000BAEC033
2_6383856	2	6383856	T	C	0.116	0.016744	0.16	0.357143	INSIDE	non-specific lipid-transfer protein-like n=1 Tax=Priapulus caudatus TaxID=37621 RepID=UPI000719AD4E
172379_8	2	7331175	G	T	0.0864805	0.00958094	0.0649351	0.0958904	INSIDE	BRISC and BRCA1-A complex member 1 n=3 Tax=Crassostrea TaxID=6564 RepID=UPI0005C392FE
2_24806853	2	24806853	A	T	0.137	0.00388	0	0.44	INSIDE	Serine palmitoyltransferase-1 n=2 Tax=Crassostrea TaxID=6564 RepID=S4SCW4_CRAGI	GO:0030170, GO:0016740, GO:0009058, GO:0016021
2_30202427	2	30202427	G	T	0.1063	0.010972	0	0.38	INSIDE	Kyphoscoliosis peptidase n=15 Tax=Crassostrea TaxID=6564 RepID=K1PD13_CRAGI
2_31819132	2	31819132	C	T	0.1166	0.00458	0	0.39	INSIDE	LOW QUALITY PROTEIN: uncharacterized protein LOC111119482 n=1 Tax=Crassostrea virginica TaxID=6565 RepID=UPI000BAF9E52
2_31820629	2	31820629	G	A	0.157	0.001498	0	0.47	INSIDE	LOW QUALITY PROTEIN: uncharacterized protein LOC111119482 n=1 Tax=Crassostrea virginica TaxID=6565 RepID=UPI000BAF9E52
277226_18	2	32038099	T	C	0.0972296	0.00559971	0.0779221	0.0821918	< 250kb	prostaglandin E synthase 2-like n=1 Tax=Aplysia californica TaxID=6500 RepID=UPI00035A10DC
239919_19	2	32220984	C	G	0.0920378	0.00752798	0.142857	0.308824	INSIDE	organic solute transporter subunit alpha-like n=1 Tax=Pecten maximus TaxID=6579 RepID=UPI0014589461
270375_0	2	32784443	C	T	0.0855069	0.00605829	0.168831	0.0625	< 250kb	centrosome and spindle pole associated protein 1-like isoform X1 n=21 Tax=Pecten maximus TaxID=6579 RepID=UPI001458AAE2
2_38523750	2	38523750	T	C	0.0758	0.031206	0	0.48	INSIDE	Regulator of chromosome condensation n=2 Tax=Pectinidae TaxID=6566 RepID=A0A210PHE8_MIZYE
240779_29	2	38933736	T	A	0.107745	0.00211678	0.233766	0.0163934	INSIDE	Protein-tyrosine-phosphatase n=18 Tax=Pectinidae TaxID=6566 RepID=A0A210R5D4_MIZYE	GO:0004725, GO:0016021
240764_18	2	39016301	T	A	0.0633122	0.00761686	0.168831	0.0151515	INSIDE	Protein-tyrosine-phosphatase n=18 Tax=Pectinidae TaxID=6566 RepID=A0A210R5D4_MIZYE	GO:0004725, GO:0016021
2_40039593	2	40039593	A	C	0.0725	0.029122	0.04	0.5	INSIDE	non-specific lipid-transfer protein-like n=1 Tax=Pecten maximus TaxID=6579 RepID=UPI001458E02A
2_40071070	2	40071070	T	A	0.0798	0.037458	0	0.23	INSIDE	non-specific lipid-transfer protein-like n=1 Tax=Pecten maximus TaxID=6579 RepID=UPI001458E02A
2_44323669	2	44323669	A	G	0.1363	0.002956	0.22	0.320513	INSIDE	Thimet oligopeptidase n=2 Tax=Mizuhopecten yessoensis TaxID=6573 RepID=A0A210PNW1_MIZYE	GO:0046872, GO:0004222
42856_5	2	50514453	G	A	0.0835289	0.00536905	0.0519481	0.0466667	< 250kb	LOW QUALITY PROTEIN: uncharacterized protein LOC117325954 n=1 Tax=Pecten maximus TaxID=6579 RepID=UPI001458D936
209886_33	2	53376997	G	A	0.0977851	0.00601728	0.168831	0.0454545	INSIDE	Major facilitator superfamily domain-containing protein 1 n=4 Tax=Pectinidae TaxID=6566 RepID=A0A210QJH3_MIZYE	GO:0022857, GO:0016021
2_56051941	2	56051941	C	T	0.1351	0.004706	0.08	0.48913	INSIDE	pancreatic triacylglycerol lipase-like n=1 Tax=Crassostrea virginica TaxID=6565 RepID=UPI000BAFB217
173598_25	3	854775	C	A	0.135195	0.0011052	0.194805	0.0238095	< 250kb	betaine--homocysteine S-methyltransferase 1-like isoform X2 n=2 Tax=Crassostrea virginica TaxID=6565 RepID=UPI000BAF2C18
3_4328109	3	4328109	T	A	0.2005	0.000132	0	0.5	INSIDE	Eukaryotic peptide chain release factor GTP-binding subunit ERF3B n=3 Tax=Crassostrea TaxID=6564 RepID=K1RCY7_CRAGI	GO:0003924, GO:0005525
181317_18	3	5325144	C	T	0.0791661	0.00814148	0.0519481	0.0202703	INSIDE	Sorbitol dehydrogenase n=2 Tax=Mizuhopecten yessoensis TaxID=6573 RepID=A0A210PEV5_MIZYE	GO:0016491, GO:0008270
209292_33	3	10407569	T	C	0.108754	0.00373117	0.012987	0.227273	< 250kb	3-phosphoadenosine-5-phosphosulfate synthase n=11 Tax=Crassostrea TaxID=6564 RepID=K1R185_CRAGI	GO:0004020, GO:0005524, GO:0004781, GO:0000103
209311_11	3	10539463	T	C	0.101565	0.00570504	0.0649351	0.304054	INSIDE	Phosphatidate cytidylyltransferase n=3 Tax=Pectinidae TaxID=6566 RepID=A0A210PUB6_MIZYE	GO:0004605, GO:0016024, GO:0016021
3_12504155	3	12504155	A	C	0.1313	0.006022	0	0.42	INSIDE	lysosomal alpha-glucosidase-like n=1 Tax=Octopus vulgaris TaxID=6645 RepID=UPI00114107BB
90362_1	3	13410301	G	A	0.0848427	0.00614627	0.298701	0.0178571	< 250kb	tyrosine-type recombinase/integrase n=1 Tax=Solemya elarraichensis gill symbiont TaxID=1918949 RepID=UPI000997E425
3_13960779	3	13960779	C	T	0.2622	1e-05	0	0.47	INSIDE	C1q-related factor n=3 Tax=Mizuhopecten yessoensis TaxID=6573 RepID=A0A210Q8I7_MIZYE
118937_15	3	18728398	T	C	0.0955585	0.00377471	0.311688	0.0181818	INSIDE	Monocarboxylate transporter 5 n=1 Tax=Mizuhopecten yessoensis TaxID=6573 RepID=A0A210PN08_MIZYE	GO:0022857, GO:0016021
118815_35	3	19006613	T	C	0.0913749	0.00472909	0.324675	0.0188679	< 250kb	prostate stem cell antigen-like n=1 Tax=Priapulus caudatus TaxID=37621 RepID=UPI000719E547
118718_26	3	19248002	T	C	0.0808283	0.00601458	0.246753	0.0166667	INSIDE	E3 ubiquitin-protein ligase TRAF7-like isoform X1 n=4 Tax=Octopus vulgaris TaxID=6645 RepID=UPI0011409D47
118430_34	3	19925455	C	T	0.0804252	0.0076404	0.0519481	0.02	INSIDE	S-adenosylmethionine synthase n=1 Tax=Biomphalaria glabrata TaxID=6526 RepID=A0A2C9KBX6_BIOGL	GO:0005524, GO:0046872, GO:0004478, GO:0006730, GO:0006556
109333_4	3	20403026	G	A	0.0921436	0.00396676	0.337662	0.0566038	< 250kb	BTB/POZ domain-containing protein 17-like n=2 Tax=Pectinidae TaxID=6566 RepID=UPI001458EECB
3_26188137	3	26188137	C	T	0.0812	0.019122	0	0.42	INSIDE	Putative zyg-1-like serine/threonine protein kinase (Fragment) n=3 Tax=Ornithodoros TaxID=6937 RepID=A0A2R5L7Q3_9ACAR	GO:0004674, GO:0031462
3_26873342	3	26873342	T	G	0.1377	0.001202	0	0.1	INSIDE	FA_desaturase domain-containing protein n=1 Tax=Pomacea canaliculata TaxID=400727 RepID=A0A2T7PYW6_POMCA	GO:0046872, GO:0016717, GO:0006633, GO:0016021
3_28409793	3	28409793	A	G	0.0876	0.016572	0	0.35	INSIDE	probable E3 ubiquitin-protein ligase HERC4 n=1 Tax=Crassostrea virginica TaxID=6565 RepID=UPI000BAEB843
3_28415984	3	28415984	T	C	0.1264	0.004296	0	0.34	INSIDE	probable E3 ubiquitin-protein ligase HERC4 n=1 Tax=Crassostrea virginica TaxID=6565 RepID=UPI000BAEB843
3_33568023	3	33568023	G	A	0.0886	0.0137	0	0.29	INSIDE	RNA helicase n=2 Tax=Takifugu TaxID=31032 RepID=A0A5C6NSB5_9TELE	GO:0005524, GO:0003676, GO:0003724
3_37423401	3	37423401	T	C	0.0862	0.017412	0	0.4	INSIDE	Serine protease n=1 Tax=Hyriopsis cumingii TaxID=165450 RepID=D2KKK2_HYRCU	GO:0004252
3_43413466	3	43413466	A	G	0.1381	0.001234	0	0.3	INSIDE	AN1-type zinc finger protein 4 n=2 Tax=Pectinidae TaxID=6566 RepID=A0A210PN22_MIZYE	GO:0008270
185992_6	3	52822008	G	T	0.0964693	0.00313401	0.233766	0.057377	< 250kb	Peroxisomal membrane protein PMP34 n=3 Tax=Pectinidae TaxID=6566 RepID=A0A210PFI9_MIZYE	GO:0016021
4_2251384	4	2251384	T	G	0.0585	0.048042	0	0.46	INSIDE	Thioredoxin domain-containing protein n=5 Tax=Octopodidae TaxID=6647 RepID=A0A0L8G3T7_OCTBM	GO:0004601, GO:0051920
4_27024967	4	27024967	A	G	0.0886	0.02018	0	0.2	INSIDE	BTB domain-containing protein n=4 Tax=Pomacea canaliculata TaxID=400727 RepID=A0A2T7P555_POMCA	GO:0051260
221361_4	4	29246635	T	C	0.194181	0.000270395	0.155844	0.0522388	< 250kb	guanine nucleotide exchange factor for Rab-3A-like isoform X1 n=3 Tax=Pecten maximus TaxID=6579 RepID=UPI0014584CB4
19806_17	4	30868560	A	G	0.106477	0.00315521	0.298701	0.410714	< 250kb	Testis-expressed sequence 11 protein n=3 Tax=Mizuhopecten yessoensis TaxID=6573 RepID=A0A210PR12_MIZYE	GO:0051321, GO:0005694
4_39095911	4	39095911	G	C	0.0853	0.034614	0.16	0.154762	INSIDE	cAMP and cAMP-inhibited cGMP 3,5-cyclic phosphodiesterase 10A-like n=1 Tax=Crassostrea virginica TaxID=6565 RepID=UPI000BB05760
238043_27	4	41694192	C	G	0.288966	1.63816e-15	0.337662	0.0377358	INSIDE	HIV Tat-specific factor 1 n=1 Tax=Mizuhopecten yessoensis TaxID=6573 RepID=A0A210PXW5_MIZYE	GO:0003723, GO:0000398
4_45423046	4	45423046	T	C	0.0918	0.01419	0	0.38	INSIDE	apolipoprotein D-like n=1 Tax=Ctenocephalides felis TaxID=7515 RepID=UPI000E6E2EE8
5_1764000	5	1764000	G	A	0.1157	0.005042	0	0.43	INSIDE	protein ABHD14B n=1 Tax=Lingula unguis TaxID=7574 RepID=A0A1S3J445_LINUN	GO:0016021
105825_35	5	2810827	A	G	0.0664711	0.00904317	0.285714	0.0175439	< 250kb	putative mannan endo-1,6-alpha-mannosidase C1198.06c n=1 Tax=Pecten maximus TaxID=6579 RepID=UPI0014590BCB
182698_17	5	7332544	T	C	0.129503	0.00134221	0.025974	0.0909091	INSIDE	LOW QUALITY PROTEIN: la-related protein 1B-like n=3 Tax=Crassostrea virginica TaxID=6565 RepID=UPI000BB0B083
5_17191352	5	17191352	G	T	0.0864	0.022846	0	0.38	INSIDE	eukaryotic translation initiation factor 5B n=1 Tax=Crassostrea gigas TaxID=29159 RepID=UPI00148A9FF2
39442_34	5	23254047	C	T	0.108067	0.00382918	0.155844	0.0970149	INSIDE	Kinesin-like protein KIF1C n=1 Tax=Collichthys lucidus TaxID=240159 RepID=A0A4U5VWU6_COLLU	GO:0005524, GO:0008017, GO:0003777, GO:0007018, GO:0008017
5_28121331	5	28121331	A	T	0.0474	0.049194	0	0.2	INSIDE	heat shock 70 kDa protein 12A isoform X1 n=2 Tax=Crassostrea gigas TaxID=29159 RepID=UPI00148ADAAB
5_29151780	5	29151780	T	A	0.0972	0.005566	0	0.21	INSIDE	Hexosyltransferase n=2 Tax=Crassostrea gigas TaxID=29159 RepID=K1QVC3_CRAGI	GO:0016757, GO:0006486, GO:0000139, GO:0016021
166822_3	5	34008325	G	T	0.139378	0.000810883	0.220779	0.120968	INSIDE	Folate_rec domain-containing protein n=1 Tax=Lottia gigantea TaxID=225164 RepID=V4A3I8_LOTGI	GO:0016021
286645_5	5	35551315	C	T	0.0829238	0.00671213	0	0.0194805	INSIDE	tudor domain-containing protein 3-like n=1 Tax=Pecten maximus TaxID=6579 RepID=UPI0014582555
270079_29	5	35790787	T	C	0.172259	8.71584e-05	0.272727	0.155172	< 250kb	FH2 domain-containing protein 1 n=2 Tax=Mizuhopecten yessoensis TaxID=6573 RepID=A0A210QAN1_MIZYE	GO:0003779, GO:0017048, GO:0030036, GO:0003779, GO:0017048
88641_20	5	36588953	C	G	0.14455	0.000929259	0.012987	0.0324675	< 250kb	LOW QUALITY PROTEIN: polyubiquitin-like n=1 Tax=Ceratina calcarata TaxID=156304 RepID=UPI000EAB2712
88559_25	5	36827791	A	T	0.0992604	0.00381991	0.116883	0.214286	INSIDE	transmembrane protein 184C-like n=1 Tax=Pecten maximus TaxID=6579 RepID=UPI001458E7A3
44413_9	5	42607468	C	A	0.064204	0.00842441	0.207792	0.0163934	INSIDE	Polypeptide N-acetylgalactosaminyltransferase n=2 Tax=Pectinidae TaxID=6566 RepID=A0A210PT88_MIZYE	GO:0030246, GO:0016757, GO:0006486, GO:0000139, GO:0016021
19288_27	5	47294897	C	G	0.0576989	0.00909325	0.155844	0.0149254	< 250kb	DOMON domain-containing protein n=1 Tax=Elysia chlorotica TaxID=188477 RepID=A0A433TJV3_ELYCH	GO:0005507, GO:0004500
5_47646089	5	47646089	C	T	0.0841	0.019044	0.08	0.391304	INSIDE	tumor suppressor candidate 3-like n=1 Tax=Aplysia californica TaxID=6500 RepID=UPI000359BEAC
5_48857211	5	48857211	T	G	0.1072	0.011006	0.1	0.388889	INSIDE	Cytochrome P450 4F22 n=3 Tax=Crassostrea gigas TaxID=29159 RepID=K1R6W1_CRAGI	GO:0020037, GO:0005506, GO:0004497, GO:0016705
5_49260648	5	49260648	T	C	0.0753	0.02545	0.1	0.466667	INSIDE	leucine-rich repeat and fibronectin type III domain-containing protein 1-like protein n=1 Tax=Mizuhopecten yessoensis TaxID=6573 RepID=UPI000B45A2B7
5_49354975	5	49354975	C	T	0.0718	0.033614	0	0.49	INSIDE	RING finger protein 121 n=4 Tax=Pectinidae TaxID=6566 RepID=A0A210PL76_MIZYE	GO:0046872, GO:0016021
186932_25	5	50588397	C	T	0.188706	0.000251662	0.0779221	0.0352113	< 250kb	leucine-rich repeat-containing protein 24-like n=1 Tax=Pecten maximus TaxID=6579 RepID=UPI0014586358
6_4147979	6	4147979	G	A	0.0731	0.025046	0.02	0.234694	INSIDE	Chitin-binding type-2 domain-containing protein n=3 Tax=Crassostrea gigas TaxID=29159 RepID=K1RAU5_CRAGI	GO:0008061, GO:0005576
6_7033130	6	7033130	T	A	0.173	0.001438	0	0.07	INSIDE	Sodium/potassium-transporting ATPase subunit alpha n=2 Tax=Veneroida TaxID=6580 RepID=A0A513U822_SINCO	GO:0005524, GO:0046872, GO:0008556, GO:0016021
65481_3	6	7757020	C	A	0.093475	0.00421917	0.324675	0.0185185	INSIDE	failed axon connections-like n=1 Tax=Pecten maximus TaxID=6579 RepID=UPI0014580824
259542_9	6	8587257	C	T	0.107958	0.00381613	0.155844	0.0769231	INSIDE	monocarboxylate transporter 12-like n=2 Tax=Crassostrea virginica TaxID=6565 RepID=UPI000BAEF48A
206963_8	6	9943132	A	T	0.115551	0.00192696	0.168831	0.0681818	< 250kb	gamma-secretase subunit PEN-2-like n=1 Tax=Pomacea canaliculata TaxID=400727 RepID=UPI000D72C2B1
6_11581379	6	11581379	T	A	0.1784	0.000392	0	0.42	INSIDE	26S proteasome non-ATPase regulatory subunit 9-like n=1 Tax=Pecten maximus TaxID=6579 RepID=UPI0014585E81
6_11586723	6	11586723	G	A	0.0608	0.022836	0	0.47	INSIDE	glucose-6-phosphate exchanger SLC37A2-like isoform X1 n=4 Tax=Pecten maximus TaxID=6579 RepID=UPI001458BB06
6_11586789	6	11586789	G	A	0.1009	0.007318	0	0.45	INSIDE	glucose-6-phosphate exchanger SLC37A2-like isoform X1 n=4 Tax=Pecten maximus TaxID=6579 RepID=UPI001458BB06
6_15595766	6	15595766	C	A	0.1047	0.015204	0.02	0.0816327	INSIDE	Collagen pro alpha-chain n=1 Tax=Haliotis discus TaxID=36094 RepID=O97406_HALDI	GO:0005201, GO:0005581
179487_19	6	15847998	A	G	0.0993377	0.00504388	0.376623	0.1	INSIDE	ATP-binding cassette sub-family C member 1 n=1 Tax=Dreissena polymorpha TaxID=45954 RepID=A0A0B5J5C7_DREPO	GO:0016887, GO:0042626, GO:0005524, GO:0016021
6_16949964	6	16949964	G	A	0.0721	0.035256	0	0.49	INSIDE	bifunctional purine biosynthesis protein PURH-like n=4 Tax=Crassostrea TaxID=6564 RepID=UPI00148AA80E
6_27362754	6	27362754	A	G	0.0534	0.04586	0	0.46	INSIDE	F-box/LRR-repeat protein 7 n=8 Tax=Pectinidae TaxID=6566 RepID=A0A210QQS3_MIZYE
6_32304661	6	32304661	C	A	0.2789	0.000262	0.3	0.142857	INSIDE	NPHS1 adhesion molecule, nephrin n=2 Tax=Anolis carolinensis TaxID=28377 RepID=H9GN95_ANOCA	GO:0050839, GO:0017022, GO:0098609, GO:0032836, GO:0072015, GO:0007254, GO:0007520, GO:0030838, GO:0035418, GO:0044062, GO:0007519, GO:0005887, GO:0042995, GO:0005911, GO:0005925, GO:0050839, GO:0017022
68801_17	6	34251609	A	G	0.108966	0.00299304	0.142857	0.0294118	< 250kb	LOW QUALITY PROTEIN: protein capicua homolog n=1 Tax=Pecten maximus TaxID=6579 RepID=UPI00145894DF
7_395526	7	395526	C	T	0.0553	0.033406	0	0.38	INSIDE	U-scoloptoxin(16)-Cw1a n=1 Tax=Crassostrea gigas TaxID=29159 RepID=UPI00148A3B3F
127038_2	7	964487	C	T	0.0588572	0.00855007	0.142857	0.0147059	INSIDE	Fibrinogen C-terminal domain-containing protein n=2 Tax=Octopus TaxID=6643 RepID=A0A0L8HDR8_OCTBM
184559_32	7	2881173	C	T	0.0981801	0.00540626	0.246753	0.0916667	< 250kb	vacuolar protein sorting-associated protein 4B-like isoform X1 n=1 Tax=Crassostrea gigas TaxID=29159 RepID=UPI0005C38572
7_15145073	7	15145073	C	A	0.0699	0.031226	0.02	0.387755	INSIDE	eIF2B_5 domain-containing protein n=1 Tax=Arion vulgaris TaxID=1028688 RepID=A0A0B6ZU51_9EUPU	GO:0003743
7_18666371	7	18666371	A	G	0.1941	0.000918	0.12	0.454545	INSIDE	core-binding factor subunit beta-like isoform X2 n=2 Tax=Crassostrea virginica TaxID=6565 RepID=UPI000BB0C7DD
7_20566394	7	20566394	T	A	0.088	0.015824	0	0.46	INSIDE	serine/threonine-protein kinase/endoribonuclease IRE1-like isoform X1 n=5 Tax=Varroa TaxID=62624 RepID=UPI000BE1659D
7_21539432	7	21539432	T	C	0.0885	0.021144	0	0.49	INSIDE	GMP reductase n=2 Tax=Pectinidae TaxID=6566 RepID=A0A210QXQ0_MIZYE	GO:0003920, GO:0046872, GO:0006144, GO:0006163, GO:1902560
203379_2	7	23126826	T	C	0.0867114	0.0055495	0.272727	0.0175439	< 250kb	Amine oxidase n=2 Tax=Lingula unguis TaxID=7574 RepID=A0A1S3H8W3_LINUN	GO:0005507, GO:0008131, GO:0048038, GO:0009308, GO:0016021
7_25393006	7	25393006	C	T	0.054	0.024344	0.22	0.128205	INSIDE	Transforming growth factor-beta-induced protein ig-h3 n=8 Tax=Crassostrea gigas TaxID=29159 RepID=K1R7Y0_CRAGI
7_33224765	7	33224765	A	T	0.1098	0.014136	0	0.06	INSIDE	GDP-mannose 4,6 dehydratase-like isoform X1 n=2 Tax=Crassostrea virginica TaxID=6565 RepID=UPI000BAFCEF7
7_34363133	7	34363133	T	C	0.0552	0.02968	0.04	0.21875	INSIDE	Testis, prostate and placenta-expressed protein n=2 Tax=Pectinidae TaxID=6566 RepID=A0A210QHF7_MIZYE
52912_17	8	833937	C	T	0.0607797	0.00868935	0.194805	0.015625	< 250kb	Succinate dehydrogenase iron-sulfur subunit n=6 Tax=Testudinoidea TaxID=8486 RepID=A0A4D9DLJ2_9SAUR	GO:0022857, GO:0016021
8_10466985	8	10466985	A	G	0.0639	0.046184	0	0.35	INSIDE	complement component 1 Q subcomponent-binding protein, mitochondrial-like n=1 Tax=Eurytemora affinis TaxID=88015 RepID=UPI000C76799E
8_16674344	8	16674344	A	G	0.0663	0.043136	0.12	0.477273	INSIDE	fatty acid-binding protein 9-like n=2 Tax=Crassostrea virginica TaxID=6565 RepID=UPI000BB088EE
8_16674397	8	16674397	C	A	0.0729	0.0367	0.12	0.409091	INSIDE	fatty acid-binding protein 9-like n=2 Tax=Crassostrea virginica TaxID=6565 RepID=UPI000BB088EE
8_19538893	8	19538893	A	G	0.0889	0.02108	0	0.42	INSIDE	Sulfotransferase family cytosolic 1B member 1 n=1 Tax=Mizuhopecten yessoensis TaxID=6573 RepID=A0A210PFB3_MIZYE	GO:0008146
136710_10	8	21731386	T	A	0.166816	0.000462085	0.428571	0.076087	< 250kb	interleukin-17C n=1 Tax=Erinaceus europaeus TaxID=9365 RepID=A0A1S3AAI4_ERIEU	GO:0005125, GO:0006954, GO:0005615, GO:0005125
136636_15	8	21903346	T	C	0.0801969	0.00692997	0.103896	0.0507246	< 250kb	sulfotransferase family cytosolic 1B member 1-like n=1 Tax=Pecten maximus TaxID=6579 RepID=UPI00145839A9
136533_0	8	22273380	C	G	0.117989	0.00338385	0.0909091	0.0486111	< 250kb	F-box only protein 21-like n=1 Tax=Mizuhopecten yessoensis TaxID=6573 RepID=UPI000B457A5B
285008_5	8	23212049	A	T	0.0953076	0.00436843	0.116883	0.195652	INSIDE	septin-2B-like isoform X7 n=2 Tax=Pectinidae TaxID=6566 RepID=UPI000B4581A0
8_23609773	8	23609773	C	A	0.0869	0.03771	0	0.23	INSIDE	P2X purinoceptor 4-like isoform X1 n=2 Tax=Crassostrea virginica TaxID=6565 RepID=UPI000BAF518F
166340_28	8	24842182	A	C	0.0821918	0.00562872	0.0649351	0.0472973	INSIDE	Oxysterol-binding protein 1 n=5 Tax=Pectinidae TaxID=6566 RepID=A0A210PUY2_MIZYE	GO:0008289, GO:0006869
208130_0	8	30666905	A	G	0.099018	0.00540333	0.38961	0.09375	< 250kb	Tripartite motif-containing protein 56 n=2 Tax=Crassostrea TaxID=6564 RepID=K1QPP1_CRAGI	GO:0008270
8_31342192	8	31342192	A	C	0.1395	0.00202	0.06	0.425532	INSIDE	Sodium/glucose cotransporter 4 n=2 Tax=Pectinidae TaxID=6566 RepID=A0A210PIN3_MIZYE	GO:0022857, GO:0016021
9_2525574	9	2525574	T	A	0.0921	0.017396	0	0.43	INSIDE	lon protease homolog, mitochondrial-like n=1 Tax=Aplysia californica TaxID=6500 RepID=UPI00065C17B5
13580_33	9	12460482	G	A	0.092589	0.00727537	0.038961	0.0789474	< 250kb	protein PRRC1-A-like isoform X1 n=2 Tax=Pecten maximus TaxID=6579 RepID=UPI001458FAA1
9_14452580	9	14452580	A	T	0.0503	0.037572	0	0.27	INSIDE	ubiquitin-conjugating enzyme E2 R2 n=2 Tax=Crassostrea TaxID=6564 RepID=UPI0005C359F7
9_20178363	9	20178363	A	C	0.0555	0.049734	0	0.45	INSIDE	serum response factor-binding protein 1 n=1 Tax=Crassostrea gigas TaxID=29159 RepID=UPI00148A59DC
9_20178364	9	20178364	C	A	0.0555	0.04811	0	0.45	INSIDE	serum response factor-binding protein 1 n=1 Tax=Crassostrea gigas TaxID=29159 RepID=UPI00148A59DC
9_21988895	9	21988895	T	C	0.1102	0.003016	0.24	0.197368	INSIDE	GRAM domain-containing protein n=1 Tax=Lottia gigantea TaxID=225164 RepID=V3ZXY9_LOTGI	GO:0016021
9_22580577	9	22580577	A	C	0.0481	0.030026	0	0.1	INSIDE	Complement C1Q-like protein n=1 Tax=Hyriopsis cumingii TaxID=165450 RepID=A0A1L2FYM6_HYRCU
9_27421434	9	27421434	T	C	0.0544	0.044664	0	0.39	INSIDE	Sorbitol dehydrogenase n=2 Tax=Pectinidae TaxID=6566 RepID=A0A210PWF1_MIZYE	GO:0016491
9_34396132	9	34396132	A	T	0.0818	0.019572	0	0.46	INSIDE	nuclear receptor 2C2-associated protein isoform X2 n=1 Tax=Petromyzon marinus TaxID=7757 RepID=UPI001402B393
9_34714048	9	34714048	T	A	0.0747	0.01311	0	0.23	INSIDE	cyclic AMP-responsive element-binding protein 3-like protein 3 isoform X2 n=2 Tax=Pecten maximus TaxID=6579 RepID=UPI00145860B7
177021_0	9	37681033	A	G	0.104987	0.00393314	0.415584	0.0744681	< 250kb	Protocadherin Fat 4 n=1 Tax=Crassostrea gigas TaxID=29159 RepID=K1QB61_CRAGI	GO:0005509, GO:0007156, GO:0016021
37532_4	10	85175	A	G	0.0943018	0.00818408	0.038961	0.153333	INSIDE	SRSF protein kinase 3 isoform X1 n=4 Tax=Crassostrea gigas TaxID=29159 RepID=UPI00148A78B5
10_1731406	10	1731406	C	T	0.1055	0.012346	0	0.44	INSIDE	LOW QUALITY PROTEIN: heme-binding protein 2-like n=1 Tax=Pecten maximus TaxID=6579 RepID=UPI00145882A4
10_1732137	10	1732137	A	G	0.0941	0.02039	0	0.42	INSIDE	LOW QUALITY PROTEIN: heme-binding protein 2-like n=1 Tax=Pecten maximus TaxID=6579 RepID=UPI00145882A4
262598_29	10	10960478	G	T	0.0816777	0.00716434	0.038961	0.0197368	INSIDE	serine/threonine-protein kinase TBK1-like isoform X1 n=2 Tax=Crassostrea virginica TaxID=6565 RepID=UPI000BAFA649
233444_3	10	15677896	G	A	0.0933008	0.00744337	0.012987	0.0649351	INSIDE	Glutathione S-transferase sigma class protein n=1 Tax=Crassostrea gigas TaxID=29159 RepID=Q5K4L8_CRAGI	GO:0016740, GO:0006749
233383_3	10	15803021	T	C	0.0940547	0.0036772	0.233766	0.0163934	< 250kb	coadhesin n=2 Tax=Crassostrea gigas TaxID=29159 RepID=UPI0005C3A322
142051_2	10	18330041	C	T	0.0921436	0.00396676	0.337662	0.0566038	< 250kb	exportin-T isoform X1 n=9 Tax=Crassostrea TaxID=6564 RepID=UPI00148AD911
142010_20	10	18474986	C	T	0.0905949	0.00856225	0.12987	0.134328	INSIDE	integrator complex subunit 13 isoform X1 n=6 Tax=Crassostrea TaxID=6564 RepID=UPI00148A1527
10_18962350	10	18962350	A	G	0.0696	0.03795	0	0.45	INSIDE	N-acyl-phosphatidylethanolamine-hydrolyzing phospholipase D-like n=2 Tax=Crassostrea virginica TaxID=6565 RepID=UPI000BAE7A78
10_19660532	10	19660532	A	T	0.0861	0.017384	0	0.41	INSIDE	heat shock 70 kDa protein 14 n=1 Tax=Lingula unguis TaxID=7574 RepID=A0A1S3JS87_LINUN	GO:0005524
255888_35	10	19786344	G	T	0.101967	0.0034676	0.0649351	0.236111	INSIDE	RIB43A-like with coiled-coils protein 2 n=2 Tax=Crassostrea TaxID=6564 RepID=K1PYT4_CRAGI
84100_31	10	20829424	C	A	0.11415	0.00252071	0.0519481	0.133333	INSIDE	Mitosis inhibitor protein kinase wee1 n=2 Tax=Crassostrea gigas TaxID=29159 RepID=K1Q742_CRAGI	GO:0005524, GO:0004672
10_20845198	10	20845198	G	C	0.1358	0.004126	0.12	0.477273	INSIDE	Mitosis inhibitor protein kinase wee1 n=2 Tax=Crassostrea gigas TaxID=29159 RepID=K1Q742_CRAGI	GO:0005524, GO:0004672
10_20845255	10	20845255	T	C	0.1409	0.008892	0.12	0.215909	INSIDE	Mitosis inhibitor protein kinase wee1 n=2 Tax=Crassostrea gigas TaxID=29159 RepID=K1Q742_CRAGI	GO:0005524, GO:0004672
10_23286715	10	23286715	G	A	0.127	0.0049	0	0.43	INSIDE	Seryl-tRNA synthetase n=3 Tax=Octopus TaxID=6643 RepID=A0A0L8GTR7_OCTBM	GO:0005524, GO:0004828, GO:0006434
300835_27	10	27375161	T	A	0.0996785	0.00305875	0.272727	0.0175439	< 250kb	cysteine-rich with EGF-like domain protein 2-B isoform X1 n=2 Tax=Crassostrea gigas TaxID=29159 RepID=UPI00148A8EA8
10_28873699	10	28873699	C	A	0.0993	0.010644	0.3	0.342857	INSIDE	cytosolic 10-formyltetrahydrofolate dehydrogenase-like isoform X1 n=8 Tax=Crassostrea TaxID=6564 RepID=UPI00148A2E29
10_30619065	10	30619065	T	C	0.0643	0.035372	0	0.42	INSIDE	monoacylglycerol lipase ABHD6-like n=1 Tax=Pecten maximus TaxID=6579 RepID=UPI001458626B
10_30619312	10	30619312	T	A	0.2291	0.0001	0.02	0.326531	INSIDE	monoacylglycerol lipase ABHD6-like n=1 Tax=Pecten maximus TaxID=6579 RepID=UPI001458626B
10_33341338	10	33341338	T	A	0.0937	0.015626	0	0.48	INSIDE	Protein MCM10 homolog n=1 Tax=Mizuhopecten yessoensis TaxID=6573 RepID=A0A210PHX2_MIZYE	GO:0003690, GO:0046872, GO:0003697, GO:0006270, GO:0005634
91812_4	10	33570000	G	T	0.213115	5.60682e-05	0.428571	0.0222222	< 250kb	Dynamin-1-like protein n=3 Tax=Biomphalaria glabrata TaxID=6526 RepID=A0A2C9K3X3_BIOGL	GO:0003924, GO:0005525, GO:0008289, GO:0000266, GO:0016559, GO:0048511, GO:0005829, GO:0005794, GO:0005741, GO:0005777, GO:0005905, GO:0030672
234122_25	10	37058575	T	A	0.0998653	0.00530605	0.207792	0.0952381	INSIDE	tyrosine-protein phosphatase non-receptor type 13-like isoform X1 n=4 Tax=Pecten maximus TaxID=6579 RepID=UPI00145871D4
10_37612271	10	37612271	T	G	0.0776	0.020568	0.12	0.409091	INSIDE	proton myo-inositol cotransporter-like isoform X1 n=2 Tax=Pecten maximus TaxID=6579 RepID=UPI0014581860
10_37612300	10	37612300	T	C	0.0589	0.032484	0.16	0.428571	INSIDE	proton myo-inositol cotransporter-like isoform X1 n=2 Tax=Pecten maximus TaxID=6579 RepID=UPI0014581860
32590_17	11	5177924	G	C	0.117585	0.00164754	0.207792	0.103175	INSIDE	Deleted in lung and esophageal cancer protein 1 n=9 Tax=Crassostrea gigas TaxID=29159 RepID=K1P3Y7_CRAGI	GO:0008285
11_13478210	11	13478210	G	C	0.0733	0.024216	0	0.33	INSIDE	Proteasome activator complex subunit 3 n=3 Tax=Crassostrea TaxID=6564 RepID=K1RFU6_CRAGI	GO:0008537
11_24509787	11	24509787	C	T	0.0664	0.03862	0	0.38	INSIDE	titin-like isoform X1 n=7 Tax=Pecten maximus TaxID=6579 RepID=UPI0014585808
110873_1	11	31038823	C	A	0.0695812	0.00781699	0.25974	0.0169492	INSIDE	transformer-2 protein homolog alpha-like isoform X1 n=3 Tax=Pecten maximus TaxID=6579 RepID=UPI001459159A
12_1667637	12	1667637	G	T	0.0499	0.030714	0	0.13	INSIDE	Eukaryotic peptide chain release factor subunit 1 n=10 Tax=Mollusca TaxID=6447 RepID=A0A2C9JCM3_BIOGL	GO:0003747, GO:0005737
12_12159778	12	12159778	A	G	0.0533	0.046334	0	0.24	INSIDE	Cyanophycinase n=1 Tax=Pomacea canaliculata TaxID=400727 RepID=A0A2T7P8M4_POMCA	GO:0008236, GO:0044260
215174_5	12	18315989	A	G	0.284404	3.11805e-16	0.272727	0.310345	INSIDE	Cathepsin L-like n=1 Tax=Tropilaelaps mercedesae TaxID=418985 RepID=A0A1V9WZ23_9ACAR	GO:0008234
41967_1	12	18947011	C	A	0.105368	0.00416804	0.506494	0.0375	INSIDE	ancient ubiquitous protein 1-like n=1 Tax=Pecten maximus TaxID=6579 RepID=UPI001457F3C7
126739_1	12	27853864	C	T	0.0949568	0.00657736	0.246753	0.0423729	< 250kb	Kv channel-interacting protein 4 n=3 Tax=Crassostrea TaxID=6564 RepID=K1QKC5_CRAGI	GO:0005509
126878_4	12	28340576	G	A	0.0620501	0.008133	0.181818	0.0153846	INSIDE	Poly [ADP-ribose] polymerase n=6 Tax=Crassostrea gigas TaxID=29159 RepID=K1PFF2_CRAGI	GO:0003950, GO:0003676
126933_19	12	28518329	A	C	0.139213	0.000948138	0.0649351	0.0810811	< 250kb	Poly [ADP-ribose] polymerase n=6 Tax=Crassostrea gigas TaxID=29159 RepID=K1PFF2_CRAGI	GO:0003950, GO:0003676
94393_31	12	31455769	C	G	0.0922716	0.00874358	0.181818	0.184615	INSIDE	MAD protein n=2 Tax=Crassostrea TaxID=6564 RepID=K1RGW6_CRAGI	GO:0046983, GO:0046983
13_2926422	13	2926422	C	A	0.2269	0.000152	0.26	0.432432	INSIDE	CDGSH iron-sulfur domain-containing protein 3, mitochondrial n=1 Tax=Mizuhopecten yessoensis TaxID=6573 RepID=A0A210QQA4_MIZYE	GO:0051537, GO:0046872, GO:0043231
268319_32	13	8706747	C	G	0.126274	0.002077	0.207792	0.246032	INSIDE	synaptojanin-1-like n=2 Tax=Pectinidae TaxID=6566 RepID=UPI001458F78C
13_8897377	13	8897377	G	T	0.0928	0.013114	0.06	0.0851064	INSIDE	galactoside 2-alpha-L-fucosyltransferase 2-like isoform X1 n=2 Tax=Mizuhopecten yessoensis TaxID=6573 RepID=UPI000B45EFA6
13_24547378	13	24547378	C	T	0.1331	0.006052	0	0.32	INSIDE	3-ketoacyl-CoA thiolase, mitochondrial n=3 Tax=Crassostrea TaxID=6564 RepID=K1PF60_CRAGI	GO:0016747
159542_18	13	24820164	A	C	0.139874	0.00114366	0.168831	0.030303	< 250kb	LOW QUALITY PROTEIN: lipoxygenase homology domain-containing protein 1-like n=1 Tax=Pomacea canaliculata TaxID=400727 RepID=UPI000D7357C2
250433_2	13	26740944	T	C	0.0829238	0.00671213	0.012987	0.0194805	INSIDE	putative ammonium transporter 1 n=1 Tax=Priapulus caudatus TaxID=37621 RepID=UPI000719C6BB
151683_1	13	27651097	T	C	0.177772	0.000337129	0.168831	0.0454545	< 250kb	Sushi, von Willebrand factor type A, EGF and pentraxin domain-containing protein 1 (Fragment) n=4 Tax=Python bivittatus TaxID=176946 RepID=A0A5B9C8I2_PYTBI
151694_31	13	27681526	T	A	0.103003	0.00367783	0.116883	0.0285714	< 250kb	Sushi, von Willebrand factor type A, EGF and pentraxin domain-containing protein 1 (Fragment) n=4 Tax=Python bivittatus TaxID=176946 RepID=A0A5B9C8I2_PYTBI
149069_19	14	4017350	T	A	0.122464	0.00151149	0.142857	0.0757576	INSIDE	cathepsin L1 n=3 Tax=Crassostrea TaxID=6564 RepID=UPI00148A39D9
14_13083437	14	13083437	A	G	0.0852	0.022306	0.22	0.205128	INSIDE	Peptidylglycine monooxygenase n=1 Tax=Agrilus planipennis TaxID=224129 RepID=A0A1W4X0R0_AGRPL	GO:0005507, GO:0004504, GO:0006518, GO:0016020
14_17636263	14	17636263	G	T	0.1896	0.000482	0.04	0.0625	INSIDE	Peptidylglycine monooxygenase n=1 Tax=Lingula unguis TaxID=7574 RepID=A0A1S3H7I0_LINUN	GO:0005507, GO:0004504, GO:0006518, GO:0016020
14_17636580	14	17636580	A	T	0.0859	0.007614	0	0.28	INSIDE	Peptidylglycine monooxygenase n=1 Tax=Lingula unguis TaxID=7574 RepID=A0A1S3H7I0_LINUN	GO:0005507, GO:0004504, GO:0006518, GO:0016020
247954_35	14	18017264	A	C	0.126006	0.00265705	0.12987	0.057971	< 250kb	Spermidine synthase n=2 Tax=Pectinidae TaxID=6566 RepID=A0A210Q7V0_MIZYE	GO:0016740, GO:0006596
14_19551687	14	19551687	A	T	0.0788	0.017182	0.26	0.0810811	INSIDE	Tripartite motif-containing protein 56 n=2 Tax=Crassostrea gigas TaxID=29159 RepID=K1QSF4_CRAGI	GO:0008270, GO:0005737
189805_32	14	20522861	A	C	0.102369	0.00501526	0.181818	0.0538462	< 250kb	Guanine nucleotide-binding protein subunit beta n=17 Tax=Lophotrochozoa TaxID=1206795 RepID=GBB_PINFU	GO:0005516, GO:0007165, GO:0005737, GO:0005516
189681_20	14	20796540	T	C	0.075773	0.00757388	0.285714	0.0175439	< 250kb	Protein kinase C n=10 Tax=Pectinidae TaxID=6566 RepID=A0A210Q3U1_MIZYE	GO:0005524, GO:0004698, GO:0007163, GO:0035556
146461_31	14	24563619	G	A	0.115355	0.00220911	0.116883	0.485714	INSIDE	Receptor protein-tyrosine kinase n=13 Tax=Pectinidae TaxID=6566 RepID=A0A210Q3S9_MIZYE	GO:0005524, GO:0005003, GO:0005887
14_32120463	14	32120463	A	C	0.0716	0.019496	0	0.33	INSIDE	E3 ubiquitin-protein ligase MIB2-like n=1 Tax=Pecten maximus TaxID=6579 RepID=UPI001459054D
15_7035214	15	7035214	A	G	0.084	0.021542	0	0.45	INSIDE	clavaminate synthase-like protein At3g21360 n=2 Tax=Crassostrea virginica TaxID=6565 RepID=UPI000BAF7526
87402_31	15	11439763	T	G	0.0873381	0.00641581	0.207792	0.0238095	INSIDE	Deleted in malignant brain tumors 1 protein n=1 Tax=Mizuhopecten yessoensis TaxID=6573 RepID=A0A210R0V5_MIZYE	GO:0005044, GO:0016021
88118_16	15	13199057	C	T	0.0980321	0.00557221	0.415584	0.0869565	< 250kb	General transcription factor 3C polypeptide 5 n=2 Tax=Crassostrea gigas TaxID=29159 RepID=K1P552_CRAGI	GO:0003677, GO:0006384, GO:0005634, GO:0000127
15_13321951	15	13321951	A	G	0.0546	0.03338	0.08	0.478261	INSIDE	extensin-like n=1 Tax=Ixodes scapularis TaxID=6945 RepID=UPI001161B615
60797_28	15	17599837	G	A	0.0570274	0.00854072	0.0909091	0.0138889	INSIDE	choline transporter-like protein 2 isoform X1 n=10 Tax=Crassostrea virginica TaxID=6565 RepID=UPI000BB03E04
245986_32	15	19221254	G	C	0.102058	0.00433619	0.207792	0.452381	INSIDE	Contactin-5 n=1 Tax=Mizuhopecten yessoensis TaxID=6573 RepID=A0A210QKU0_MIZYE	GO:0016021
15_24501737	15	24501737	A	G	0.1777	0.001216	0	0.35	INSIDE	Centriolin n=27 Tax=Pectinidae TaxID=6566 RepID=A0A210PLV1_MIZYE	GO:0008092, GO:0051493, GO:0005815, GO:0008092
314043_24	15	27660909	G	A	0.103739	0.00252537	0.246753	0.0169492	INSIDE	Peptidyl-prolyl cis-trans isomerase n=3 Tax=Crassostrea TaxID=6564 RepID=K1QK10_CRAGI	GO:0003755
314040_9	15	27669397	A	G	0.104895	0.00211187	0.233766	0.0508475	INSIDE	Peptidyl-prolyl cis-trans isomerase n=3 Tax=Crassostrea TaxID=6564 RepID=K1QK10_CRAGI	GO:0003755
15_30613820	15	30613820	T	A	0.1473	0.001088	0	0.13	INSIDE	Golgin subfamily A member 2 n=2 Tax=Mizuhopecten yessoensis TaxID=6573 RepID=A0A210QP81_MIZYE	GO:0005794
231952_8	16	3785839	G	T	0.0819393	0.00792617	0.181818	0.0230769	< 250kb	Tumor necrosis factor ligand superfamily member 10 n=3 Tax=Crassostrea gigas TaxID=29159 RepID=K1R207_CRAGI	GO:0005164, GO:0006955, GO:0016021, GO:0005164
16_3928743	16	3928743	T	C	0.1146	0.007138	0	0.48	INSIDE	Tumor necrosis factor ligand superfamily member 10 n=3 Tax=Crassostrea gigas TaxID=29159 RepID=K1R207_CRAGI	GO:0005164, GO:0006955, GO:0016021, GO:0005164
298282_4	16	7526941	G	T	0.114377	0.00229731	0.233766	0.025	INSIDE	peripheral plasma membrane protein CASK-like n=1 Tax=Octopus vulgaris TaxID=6645 RepID=UPI001140DAE2
16_14629719	16	14629719	A	G	0.1143	0.012222	0	0.35	INSIDE	Importin-5 n=2 Tax=Pectinidae TaxID=6566 RepID=A0A210QEH5_MIZYE	GO:0006606, GO:0005634, GO:0005737
16_19653261	16	19653261	G	T	0.0484	0.04538	0.02	0.316327	INSIDE	Contactin-associated protein like 5-3 n=1 Tax=Mizuhopecten yessoensis TaxID=6573 RepID=A0A210QFB9_MIZYE	GO:0005509, GO:0016020
16_19735623	16	19735623	A	G	0.101	0.004042	0	0.14	INSIDE	thymidylate kinase-like n=1 Tax=Pecten maximus TaxID=6579 RepID=UPI001458ACCE
174455_5	16	22681685	C	T	0.199179	0.000206818	0.324675	0.037037	< 250kb	AP complex subunit sigma n=11 Tax=Arthropoda TaxID=6656 RepID=A0A1Y1L6K7_PHOPY	GO:0006886, GO:0016192, GO:0030117
16_25918735	16	25918735	T	C	0.0826	0.017958	0	0.44	INSIDE	metalloreductase STEAP4-like isoform X1 n=4 Tax=Pecten maximus TaxID=6579 RepID=UPI0014588784
17_698166	17	698166	T	C	0.0516	0.037898	0.06	0.0851064	INSIDE	hemicentin-2-like n=1 Tax=Mizuhopecten yessoensis TaxID=6573 RepID=UPI000B458F54
45581_8	17	1657437	A	G	0.100922	0.00288659	0.038961	0.0592105	INSIDE	NRIF2 (Fragment) n=1 Tax=Poeciliopsis prolifica TaxID=188132 RepID=A0A0S7LQ49_9TELE
45662_19	17	1828461	A	T	0.138205	0.0010751	0.467532	0.0232558	INSIDE	Exodeoxyribonuclease III n=2 Tax=Bathymodiolus brooksi thiotrophic gill symbiont TaxID=1052209 RepID=A0A482YQX5_9BACT	GO:0008853
17_2795529	17	2795529	G	A	0.0617	0.033394	0	0.35	INSIDE	LOW QUALITY PROTEIN: uncharacterized protein LOC111105512 n=3 Tax=Crassostrea virginica TaxID=6565 RepID=UPI000BAF4856
46267_18	17	4021950	G	C	0.106017	0.00260399	0.337662	0.0188679	< 250kb	E3 ubiquitin-protein ligase TRIM56 n=2 Tax=Pectinidae TaxID=6566 RepID=A0A210PH75_MIZYE	GO:0008270
46277_27	17	4022581	A	C	0.0747637	0.00467613	0.454545	0.0113636	< 250kb	E3 ubiquitin-protein ligase TRIM56 n=2 Tax=Pectinidae TaxID=6566 RepID=A0A210PH75_MIZYE	GO:0008270
294497_25	17	4573773	T	C	0.109261	0.00286106	0.220779	0.443548	< 250kb	acetylcholine receptor subunit alpha-type acr-7-like n=1 Tax=Pomacea canaliculata TaxID=400727 RepID=UPI000D73BCF4
17_7757302	17	7757302	A	G	0.1022	0.005982	0	0.26	INSIDE	failed axon connections homolog n=1 Tax=Saccoglossus kowalevskii TaxID=10224 RepID=UPI0001CB999A
238552_6	17	8867038	G	A	0.113216	0.00221295	0.38961	0.0204082	INSIDE	RBR-type E3 ubiquitin transferase n=3 Tax=Pectinidae TaxID=6566 RepID=A0A210Q7G9_MIZYE	GO:0046872, GO:0004842, GO:0016021
17_10686881	17	10686881	C	T	0.1343	0.003456	0	0.47	INSIDE	Niemann-Pick C1 protein-like n=1 Tax=Crassostrea gigas TaxID=29159 RepID=UPI0009752345
17_11850848	17	11850848	T	A	0.2686	0.001818	0.3	0.242857	INSIDE	DUF4149 domain-containing protein n=1 Tax=Haliotis diversicolor TaxID=36095 RepID=B3TK28_HALDV	GO:0016021
17_19174105	17	19174105	C	A	0.0889	0.020536	0	0.35	INSIDE	sterile alpha motif domain-containing protein 9-like n=1 Tax=Crassostrea gigas TaxID=29159 RepID=UPI00148AAFDE
85707_24	18	4658761	G	A	0.101259	0.00361019	0.181818	0.109375	INSIDE	Mothers against decapentaplegic homolog n=1 Tax=Meretrix meretrix TaxID=291251 RepID=A0A1P8LK51_MERMT	GO:0003677, GO:0046872, GO:0006355, GO:0007179, GO:0005634, GO:0005737, GO:0005667
185610_1	18	15244382	C	T	0.108335	0.00235962	0.311688	0.0185185	INSIDE	Testis-expressed sequence 9 protein n=6 Tax=Crassostrea TaxID=6564 RepID=K1R6U8_CRAGI
18_15846462	18	15846462	C	T	0.1065	0.024588	0.24	0.355263	INSIDE	hemicentin-1-like n=2 Tax=Crassostrea virginica TaxID=6565 RepID=UPI000BAE8741
263423_32	18	16930883	T	C	0.106679	0.00267912	0.181818	0.0692308	INSIDE	fumarylacetoacetase-like n=1 Tax=Pecten maximus TaxID=6579 RepID=UPI0014588039
18_16983304	18	16983304	A	G	0.1669	0.001144	0	0.23	INSIDE	Cysteine dioxygenase n=1 Tax=Mizuhopecten yessoensis TaxID=6573 RepID=A0A210QMP1_MIZYE	GO:0017172, GO:0005506, GO:0042412
314839_11	18	17054167	C	T	0.0947127	0.00709252	0.12987	0.311594	< 250kb	fibrillin-1 isoform X1 n=8 Tax=Crassostrea gigas TaxID=29159 RepID=UPI00148A270C
263498_8	18	17284544	G	A	0.114928	0.00280323	0.233766	0.204918	< 250kb	fibrillin-1 isoform X1 n=8 Tax=Crassostrea gigas TaxID=29159 RepID=UPI00148A270C
258399_24	18	17697950	T	C	0.107613	0.00470495	0.25974	0.152542	INSIDE	IgGFc-binding protein-like n=3 Tax=Branchiostoma belcheri TaxID=7741 RepID=UPI0009482B77
18_20944400	18	20944400	A	G	0.0631	0.042886	0	0.22	INSIDE	Cathepsin L n=1 Tax=Meretrix meretrix TaxID=291251 RepID=A0A173DQE9_MERMT	GO:0008234
18_20951750	18	20951750	T	C	0.0841	0.02106	0	0.49	INSIDE	Cathepsin L n=1 Tax=Meretrix meretrix TaxID=291251 RepID=A0A173DQE9_MERMT	GO:0008234
19_11422456	19	11422456	G	T	0.0456	0.040312	0.16	0.416667	INSIDE	Predicted protein (Fragment) n=1 Tax=Nematostella vectensis TaxID=45351 RepID=A7RNJ5_NEMVE
19_13393947	19	13393947	A	G	0.118	0.00877	0.1	0.366667	INSIDE	Nuclear receptor subfamily 4 group A member 2 (Fragment) n=1 Tax=Lottia gigantea TaxID=225164 RepID=V4B1N8_LOTGI	GO:0004879, GO:0043565, GO:0008270, GO:0005634, GO:0005737
138862_2	19	14285868	C	T	0.169563	0.000295645	0.415584	0.0319149	INSIDE	Receptor protein-tyrosine kinase n=2 Tax=Sinonovacula constricta TaxID=98310 RepID=A0A3G1S238_SINCO	GO:0005524, GO:0004714, GO:0016021
83241_35	19	19121785	C	T	0.0969184	0.00586177	0.025974	0.1	INSIDE	dynein heavy chain 7, axonemal-like isoform X9 n=1 Tax=Crassostrea virginica TaxID=6565 RepID=UPI000BAEDBAD
293683_6	19	19296724	C	T	0.118849	0.00233206	0.220779	0.0322581	INSIDE	Complement 1 q protein n=1 Tax=Meretrix meretrix TaxID=291251 RepID=F1DI21_MERMT
